# Supplementary material
Source: PubMed Central journal article supplement (PMC3490221)
Supplement: NIHMS413989-supplement-1_si_001.pdf [file NIHMS413989-supplement-1_si_001.pdf]

**Lewis Acid Mediated (3 + 2) Cycloadditions of Donor-Acceptor Cyclopropanes with Heterocumulenes**

Alexander F. G. Goldberg, Nicholas R. O'Connor,<sup>#</sup> Robert A. Craig, II,<sup>#</sup> and Brian M. Stoltz\*

*The Warren and Katharine Schlinger Laboratory for Chemistry and Chemical Engineering, Division of Chemistry and Chemical Engineering, California Institute of Technology, 1200 E California Boulevard, MC 101-20, Pasadena, CA 91125, USA*

**Table of Contents**

|                                    |     |
|------------------------------------|-----|
| Materials and Methods              | S2  |
| General Experimental Procedures    | S3  |
| Cyclopropane Characterization Data | S6  |
| Thioimidate Characterization Data  | S10 |
| Amidine Characterization Data      | S16 |
| Lactam Characterization Data       | S20 |
| NMR & IR Spectra                   | S22 |
| Crystallography Data               | S82 |

**Materials and Methods.** Unless stated otherwise, reactions were performed in flame-dried or oven-dried glassware under an argon or nitrogen atmosphere using dry, deoxygenated solvents (distilled or passed over a column of activated alumina).<sup>1</sup> Diazodimethylmalonate was prepared according to the method of Davies and coworkers.<sup>2</sup> Commercially obtained reagents were used as received with the exception of tin(II) triflate and iron(III) chloride, which were stored in a nitrogen-filled glovebox. Thin-layer chromatography (TLC) was performed using E. Merck silica gel 60 F254 precoated plates (0.25 mm) and visualized by UV fluorescence quenching, potassium permanganate, or *p*-anisaldehyde staining. SiliaFlash P60 Academic Silica gel (particle size 0.040-0.063 mm) was used for flash chromatography. <sup>1</sup>H and <sup>13</sup>C NMR spectra were recorded on a Varian 400 (at 400 MHz and 100 MHz, respectively) or on a Varian Mercury 500 (at 500 MHz and 126 MHz, respectively) and are reported relative to CHCl<sub>3</sub> (δ 7.26 & 77.16 ppm, respectively) or tetramethylsilane (0.00 ppm). Data for <sup>1</sup>H NMR spectra are reported as follows: chemical shift (δ ppm) (multiplicity, coupling constant (Hz), integration). Abbreviations are used as follows: s = singlet, d = doublet, t = triplet, q = quartet, hept = heptet, m = complex multiplet, app = apparent. IR spectra were recorded on a Perkin Elmer Paragon 1000 Spectrometer and are reported in frequency of absorption (cm<sup>-1</sup>). HRMS were acquired using an Agilent 6200 Series TOF with an Agilent G1978A Multimode source in electrospray ionization (ESI), atmospheric pressure chemical ionization (APCI) or mixed (MM) ionization mode; HRMS were also acquired using a JEOL JMS-600H with fast atom bombardment (FAB). Optical rotations were recorded on a JASCO P-2000 Polarimeter. Enantiomeric excesses were determined by chiral HPLC (Agilent 1100 Series) or chiral SFC (Thar).

---

<sup>1</sup> Pangborn, A. B.; Giardello, M. A.; Grubbs, R. H.; Rosen, R. K.; Timmers, F. J. *Organometallics* **1996**, *15*, 1518–1520.

<sup>2</sup> Baum, J. S.; Shook, D. A.; Davies, H. M. L.; Smith, D. *Synth. Commun.* **1987**, *17*, 1709–1716.

## General Experimental Procedures

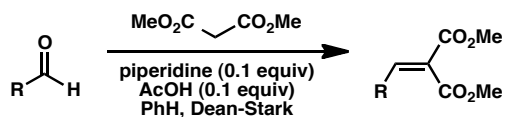

### General Procedure A. Knoevenagel condensation.

A round-bottom flask was charged with the appropriate aldehyde (14.4 mmol), followed by benzene (85 mL), dimethyl malonate (15.8 mmol), piperidine (1.44 mmol), and acetic acid (1.44 mmol). The flask was equipped with a Dean-Stark trap and condenser and the solution heated to reflux. Upon completion (as determined by TLC analysis), evaporation of the solvent gave the crude product, which was purified by silica gel column chromatography.

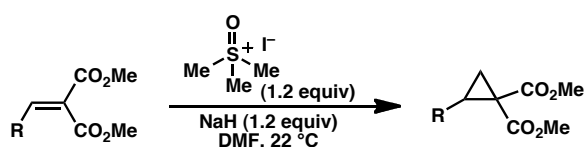

### General Procedure B. Corey-Chaykovsky cyclopropanation.

Sodium hydride (2.56 mmol, 60% dispersion in mineral oil) was suspended in anhydrous DMF (4 mL) in a flame-dried round-bottom flask under nitrogen. Trimethylsulfoxonium iodide (2.56 mmol) was added, and the solution stirred at ambient temperature for 1 hour. A solution of the appropriate benzylidene malonate (2.13 mmol) in anhydrous DMF (2 mL) was added, and the reaction mixture allowed to stir at room temperature. Upon completion (as determined by TLC analysis), the solution was poured onto a mixture of ice and 2 M HCl<sub>(aq)</sub> (10 mL) and extracted with diethyl ether (3 x 30 mL). The combined organic layers were washed once with brine, dried over magnesium sulfate, filtered and concentrated *in vacuo* to give the crude product, which was purified by silica gel column chromatography.

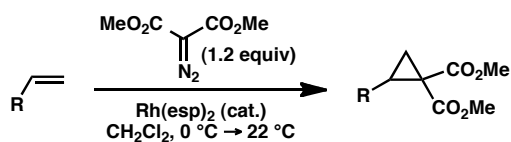

### General Procedure C. Styrene cyclopropanation.

Rh(esp)<sub>2</sub> (0.3 mg) was added to a flame-dried round-bottom flask, which was then evacuated and backfilled with nitrogen three times. The appropriate styrene (5.0 mmol) and anhydrous dichloromethane (5 mL) were then added and the solution was stirred under nitrogen and cooled in an ice bath. A solution of diazodimethylmalonate (6.0 mmol) in anhydrous dichloromethane (5 mL) was added dropwise over 20 minutes. The reaction solution was then allowed to warm to ambient temperature. Upon completion (as determined by TLC analysis), the crude product was adsorbed onto silica gel and purified by column chromatography. When traces of the rhodium catalyst remained after chromatography (as determined by a blue discoloration), the product was dissolved in anhydrous benzene (1.5 mL) in a flame-dried round-bottom flask. A solution of

tetrakis(hydroxymethyl)phosphonium hydroxide (10  $\mu$ L, 1M in isopropanol) was added,<sup>3</sup> and the mixture was stirred at 60 °C for 12 hours. The solution was then cooled to room temperature, diluted with diethyl ether (20 mL), washed once with water and once with brine, dried over magnesium sulfate, filtered and concentrated to give the purified product.

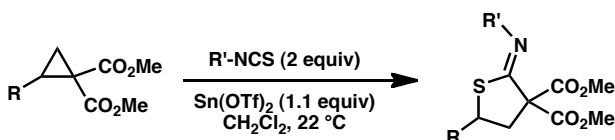

**General Procedure D.** *Isothiocyanate (3 + 2) reaction with D-A cyclopropanes*

To an oven-dried 1 dram vial equipped with a magnetic stir bar was added tin(II) trifluoromethanesulfonate (0.44 mmol) in an inert atmosphere glovebox. The vial was sealed with a screw cap fitted with a Teflon septum, removed from the glovebox and placed under a nitrogen atmosphere. To a separate, oven-dried 1 dram vial were added the appropriate cyclopropane (0.4 mmol) and isothiocyanate (0.8 mmol). The vial was sealed with a screw cap fitted with a Teflon septum, and the mixture was transferred to the first vial as a solution in anhydrous dichloromethane (1 mL + 0.33 mL rinse). The heterogeneous reaction mixture was then allowed to stir at ambient temperature under nitrogen. Upon consumption of the cyclopropane (as determined by TLC analysis), the reaction solution was diluted with dichloromethane (3 mL) and methanol (1 mL), adsorbed onto Celite, and purified by silica gel column chromatography. The products of this reaction were often found to be unstable during prolonged storage (~1 week) at ambient temperature; the decomposition products have not been identified.

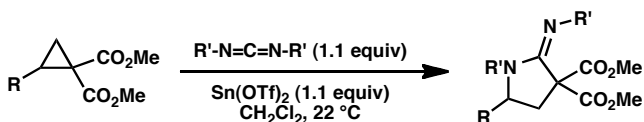

**General Procedure E.** *Carbodiimide (3 + 2) reaction with D-A cyclopropanes*

To an oven-dried 1 dram vial equipped with a magnetic stir bar was added tin(II) trifluoromethanesulfonate (0.44 mmol) in an inert atmosphere glovebox. The vial was sealed with a screw cap fitted with a Teflon septum, removed from the glovebox and placed under a nitrogen atmosphere. To a separate, oven-dried 1 dram vial were added the appropriate cyclopropane (0.4 mmol) and carbodiimide (0.44 mmol). The vial was sealed with a screw cap fitted with a Teflon septum, and the mixture was transferred to the first vial as a solution in anhydrous dichloromethane (1 mL + 0.33 mL rinse). The heterogeneous reaction mixture was then allowed to stir at ambient temperature under nitrogen. Upon consumption of the cyclopropane (as determined by TLC analysis), the reaction solution was diluted with dichloromethane (3 mL) and methanol (1 mL), adsorbed onto Celite, and purified by silica gel column chromatography. The product obtained after column chromatography is an amidinium salt, which is dissolved in DCM,

<sup>3</sup> Pederson, R. L.; Fellows, I. M.; Ung, T. A.; Ishihara, H.; Hajela, S. P. *Adv. Synth. Catal.* **2002**, *344*, 728–735.



and washed with aqueous sodium hydroxide (0.1 M) and brine, then dried over sodium sulfate, filtered, and concentrated *in vacuo* to yield the free amidine base.

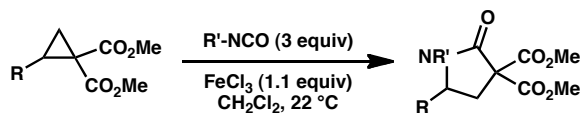

**General Procedure F.** *Isocyanate (3 + 2) reaction with D-A cyclopropanes, Method A.*

To a flame-dried 10 mL flask equipped with a magnetic stir bar was added iron(III) chloride (0.44 mmol) in an inert atmosphere glovebox. The flask was sealed with a Teflon septum, removed from glovebox and placed under a nitrogen atmosphere. To an oven-dried 1 dram vial were added the appropriate cyclopropane (0.4 mmol) and isocyanate (1.2 mmol). The vial was sealed with a screw cap fitted with a Teflon septum, and this mixture was transferred to the reaction flask as a solution in anhydrous dichloromethane (1 mL + 0.33 mL rinse). The solution was then allowed to stir at ambient temperature under nitrogen. Upon consumption of the cyclopropane (as determined by TLC analysis), the reaction solution was diluted with dichloromethane, adsorbed onto Celite, and purified by silica gel column chromatography.

**General Procedure G.** *Isocyanate (3 + 2) reaction with D-A cyclopropanes, Method B.*

To an oven-dried 1 dram vial equipped with a magnetic stir bar was added iron (III) chloride (0.44 mmol) and oven-dried 4Å molecular sieves (50 mg). The vial was sealed with a screw cap fitted with a rubber septum, and was placed under a nitrogen atmosphere. To a second oven-dried 1 dram vial was added the appropriate cyclopropane (0.4 mmol) and isocyanate (1.2 mmol). The vial was sealed with a screw cap fitted with a Teflon septum and this mixture was transferred to the first vial as a solution in anhydrous dichloromethane (1 mL + 0.33 mL rinse). The mixture was then allowed to stir at ambient temperature under nitrogen. Upon consumption of the cyclopropane (as determined by TLC analysis), the reaction mixture was partitioned between dichloromethane and saturated aqueous sodium bicarbonate. The layers were separated and the aqueous phase was washed twice with dichloromethane. The combined organic layers were washed with brine, dried over magnesium sulfate, filtered, and concentrated *in vacuo*. The crude product was purified by column chromatography.

## Cyclopropane Characterization Data

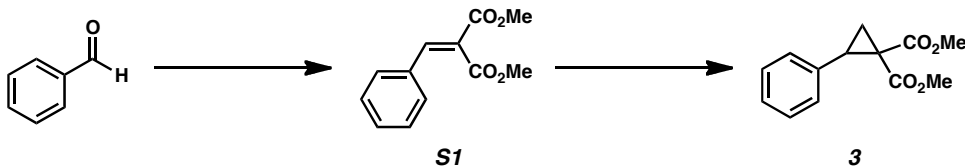**dimethyl 2-phenylcyclopropane-1,1-dicarboxylate**

Benzylidene dimethylmalonate **S1** was prepared according to General Method A: 99% yield.  $R_f = 0.60$  (3:1 Hexanes:EtOAc eluent). Characterization data matches those reported in the literature.<sup>4</sup>

Cyclopropane **3** was prepared according to General Method B: 66% yield.  $R_f = 0.60$  (3:1 Hexanes:EtOAc eluent). Characterization data matches those reported in the literature.<sup>5</sup>

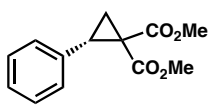**(S)-3****(S)-dimethyl 2-phenylcyclopropane-1,1-dicarboxylate**

Cyclopropane (*S*)-**3** was prepared according to literature methods.<sup>6</sup>  $[\alpha]_D^{25.0} -133.17^\circ$  ( $c$  0.99,  $\text{CHCl}_3$ , >98% ee).

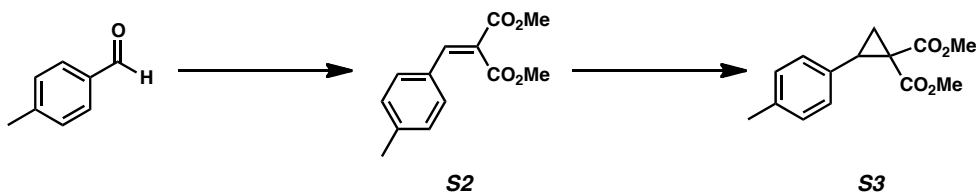**dimethyl 2-(p-tolyl)cyclopropane-1,1-dicarboxylate**

Benzylidene dimethylmalonate **S2** was prepared according to General Method A: 30% yield.  $R_f = 0.19$  (3:1 Hexanes:EtOAc eluent). Characterization data matches those reported in the literature.<sup>7</sup>

Cyclopropane **S3** was prepared according to General Method B: 77% yield.  $R_f = 0.60$  (3:1 Hexanes:EtOAc). Characterization data matches those reported in the literature.<sup>8</sup>

<sup>4</sup> Smith, III, A. B.; Liu, Z. *Org. Lett.* **2008**, *10*, 4363–4365.

<sup>5</sup> Goudreau, S. R.; Marcoux, D.; Charette, A. B. *J. Org. Chem.* **2009**, *74*, 470–473.

<sup>6</sup> Davies, H. M. L.; Bruzinski, P. R.; Lake, D. H.; Kong, N.; Fall, M. J. *J. Am. Chem. Soc.* **1996**, *118*, 6897–6907.

<sup>7</sup> Rappoport, Z.; Gazit, A. *J. Org. Chem.* **1986**, *51*, 4107–4111.

<sup>8</sup> Davies, H. M. L.; Panaro, S. A. *Tetrahedron* **2000**, *56*, 4871–4880.

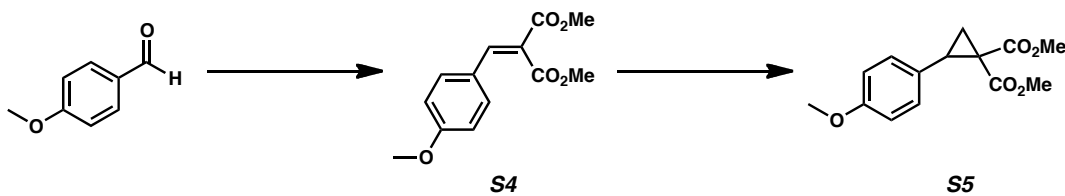

**dimethyl 2-(4-methoxyphenyl)cyclopropane-1,1-dicarboxylate**

Benzylidene dimethylmalonate **S4** was prepared according to General Method A: 92% yield.  $R_f = 0.27$  (3:1 Hexanes:EtOAc eluent). Characterization data matches those reported in the literature.<sup>9</sup>

Cyclopropane **S5** was prepared according to General Method B: 95% yield.  $R_f = 0.40$  (3:1 Hexanes:EtOAc eluent). Characterization data matches those reported in the literature.<sup>10</sup>

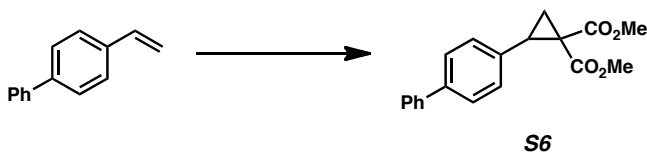

**dimethyl 2-([1,1'-biphenyl]-4-yl)cyclopropane-1,1-dicarboxylate**

Cyclopropane **S6** was prepared according to General Method C: 99% yield.  $R_f = 0.48$  (3:1 Hexanes:EtOAc eluent). Characterization data matches those reported in the literature.<sup>11</sup>

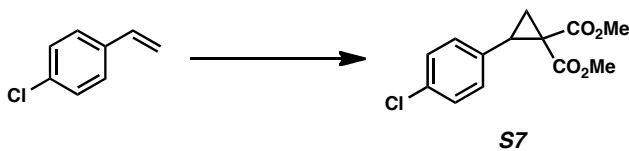

**dimethyl 2-(4-chlorophenyl)cyclopropane-1,1-dicarboxylate**

Cyclopropane **S7** was prepared according to General Method C: 99% yield.  $R_f = 0.53$  (3:1 Hexanes:EtOAc eluent). Characterization data matches those reported in the literature.<sup>10</sup>

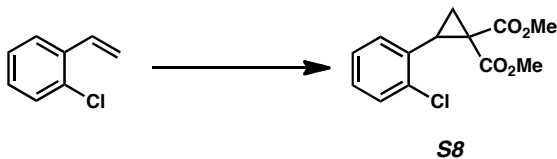

**dimethyl 2-(2-chlorophenyl)cyclopropane-1,1-dicarboxylate**

Cyclopropane **S8** was prepared according to General Method C: 60% yield.  $R_f = 0.50$  (3:1 Hexanes:EtOAc eluent); <sup>1</sup>H NMR (500 MHz, CDCl<sub>3</sub>)  $\delta$  7.39–7.33 (m, 1H), 7.22–7.15 (m, 2H), 7.11–7.07 (m, 1H), 3.81 (s, 3H), 3.36 (s, 4H), 2.26 (dd,  $J = 8.3, 5.2$  Hz, 1H), 1.79 (dd,  $J = 9.1, 5.2$  Hz, 1H); <sup>13</sup>C NMR (126 MHz, CDCl<sub>3</sub>)  $\delta$  170.0, 167.1, 136.6, 132.8, 129.3, 129.0, 128.9, 126.5, 53.0, 52.4, 36.5, 31.3, 19.0; IR (Neat Film, NaCl) 3001, 2953,

<sup>9</sup> Srgel, S.; Tokunaga, N.; Sasaki, K.; Okamoto, K.; Hayashi, T. *Org. Lett.* **2008**, *10*, 589–592.

<sup>10</sup> De Simone, F.; Saget, T.; Benfatti, F.; Almeida, S.; Waser, J. *Chem.–Eur. J.* **2011**, *51*, 14527–14538.

<sup>11</sup> Chagarovskiy, A. O.; Ivanova, O. A.; Rakhmankulov, E. R.; Budynina, E. M.; Trushkov, I. V.; Melnikov, M. Y. *Adv. Synth. Catal.* **2010**, *352*, 3179–3184.

1732, 1483, 1435, 1377, 1331, 1288, 1219, 1131, 1055, 894, 785, 754  $\text{cm}^{-1}$ ; HRMS (ESI)  $m/z$  calc'd for  $\text{C}_{13}\text{H}_{14}^{35}\text{ClO}_4$   $[\text{M}+\text{H}]^+$ : 269.0575, found 269.0573.

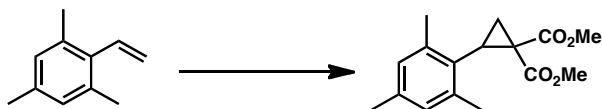**S9**

**dimethyl 2-mesitylcyclopropane-1,1-dicarboxylate**

Cyclopropane **S9** was prepared according to General Method C: 71% yield.  $R_f = 0.40$  (3:1 Hexanes:EtOAc eluent);  $^1\text{H}$  NMR (500 MHz,  $\text{CDCl}_3$ )  $\delta$  6.81 (s, 2H), 3.83 (s, 3H), 3.34 (s, 3H), 3.10–3.02 (app t,  $J = 9.3$  Hz, 1H), 2.42–2.36 (dd,  $J = 8.9, 4.9$  Hz, 1H), 2.32 (s, 6H), 2.22 (s, 3H), 1.97–1.89 (dd,  $J = 9.6, 4.9$  Hz, 1H);  $^{13}\text{C}$  NMR (126 MHz,  $\text{CDCl}_3$ )  $\delta$  170.8, 168.0, 136.6, 129.2, 128.5, 52.9, 52.2, 35.3, 32.0, 24.0, 21.0; IR (Neat Film, NaCl) 2953, 2921, 1728, 1612, 1437, 1372, 1328, 1287, 1224, 1196, 1128, 1096, 1032, 1015, 992, 894, 852, 782, 718  $\text{cm}^{-1}$ ; HRMS (Low Voltage MM: ESI-APCI)  $m/z$  calc'd for  $\text{C}_{16}\text{H}_{21}\text{O}_4$   $[\text{M}+\text{H}]^+$ : 277.1434, found 277.1420.

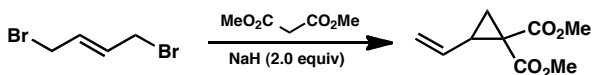**S10**

**dimethyl 2-vinylcyclopropane-1,1-dicarboxylate**

Cyclopropane **S10** was prepared according to the method of Johnson and coworkers.<sup>12</sup>

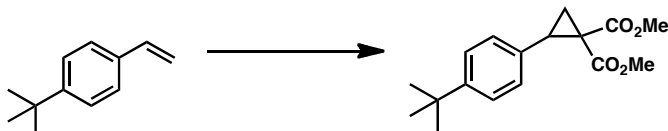**S11**

**dimethyl 2-(4-(tert-butyl)phenyl)cyclopropane-1,1-dicarboxylate**

Cyclopropane **S11** was prepared according to General Method C: 89% yield.  $R_f = 0.50$  (3:1 Hexanes:EtOAc eluent). Characterization data matches those reported in the literature.<sup>13</sup>

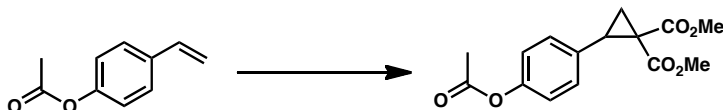**S12**

**dimethyl 2-(4-acetoxyphenyl)cyclopropane-1,1-dicarboxylate**

Cyclopropane **S12** was prepared according to General Method C: 67% yield.  $R_f = 0.30$  (3:1 Hexanes:EtOAc eluent). Characterization data matches those reported in the literature.<sup>14</sup>

<sup>12</sup> Parsons, A. T.; Campbell, M. J.; Johnson, J. S. *Org. Lett.* **2008**, *10*, 2541–2544.

<sup>13</sup> Perreault, C.; Goudreau, S. R.; Zimmer, L. E.; Charette, A. B.; *Org. Lett.* **2008**, *10*, 689–692.

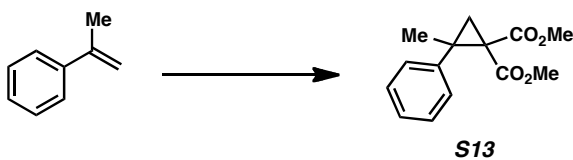

**dimethyl 2-methyl-2-phenylcyclopropane-1,1-dicarboxylate**

Cyclopropane **S13** was prepared according to General Method C: 41% yield.  $R_f = 0.53$  (3:1 Hexanes:EtOAc eluent). Characterization data matches those reported in the literature.<sup>15</sup>

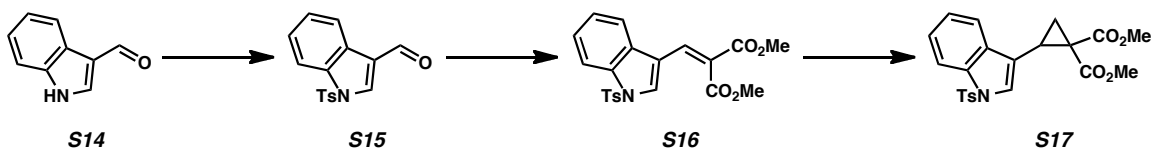

**dimethyl 2-(1-tosyl-1H-indol-3-yl)cyclopropane-1,1-dicarboxylate**

*N*-Tosylindole-3-carboxaldehyde (**S15**) was prepared according to literature methods from indole-3-carboxaldehyde (**S14**).<sup>16</sup>

Benzylidene dimethylmalonate **S16** was prepared according to General Method A: 75% yield.  $R_f = 0.20$  (3:1 Hexanes:EtOAc eluent). Characterization data matches those reported in the literature.<sup>17</sup>

Cyclopropane **S17** was prepared according to General Method B: 95% yield.  $R_f = 0.30$  (3:1 Hexanes:EtOAc eluent).<sup>17</sup>

<sup>14</sup> Pohlhaus, P. D.; Sanders, S. D.; Parsons, A. T.; Li, W.; Johnson, J. S.; *J. Am. Chem. Soc.* **2008**, *130*, 8642–8650.

<sup>15</sup> Georgakopoulou, G.; Kalogiros, C.; Hadjiarapoglou, L. P. *Synlett* **2001**, 1843–1846.

<sup>16</sup> Guo, X.; Hu, W.; Cheng, S.; Wang, L.; Chang, J. *Synth. Commun.* **2006**, *36*, 781–788.

<sup>17</sup> Ivanova, O. A.; Budynina, E. M.; Chagarovskiy, A. O.; Rakhmankulov, E. R.; Trushkov, I. V.; Semeykin, A. V.; Shimanovskii, N. L.; Melnikov, M. Y. *Chem.–Eur. J.* **2011**, *17*, 11738–11742.

**Thioimidate Characterization Data**

Unless stated otherwise, all thioimidates were prepared according to General Method D

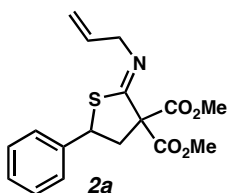

**(Z)-dimethyl 2-(allylimino)-5-phenyldihydrothiophene-3,3(2H)-dicarboxylate (2a):** 92% yield.  $R_f = 0.45$  (7:3 Hexanes:EtOAc eluent);  $^1\text{H NMR}$  (500 MHz,  $\text{CDCl}_3$ )  $\delta$  7.46–7.40 (m, 2H), 7.39–7.34 (m, 2H), 7.33–7.29 (m, 1H), 5.99 (ddt,  $J = 17.1, 10.4, 5.2$  Hz, 1H), 5.26 (dq,  $J = 17.2, 1.8$  Hz, 1H), 5.13 (dq,  $J = 10.4, 1.7$  Hz, 1H), 4.73 (dd,  $J = 11.7, 4.9$  Hz, 1H), 4.00 (dtd,  $J = 5.5, 1.8, 0.7$  Hz, 2H), 3.88 (s, 3H), 3.81 (s, 3H), 3.12 (dd,  $J = 13.0, 4.9$  Hz, 1H), 2.90 (dd,  $J = 13.0, 11.7$  Hz, 1H);  $^{13}\text{C NMR}$  (126 MHz,  $\text{CDCl}_3$ )  $\delta$  168.4, 168.1, 166.0, 138.2, 134.0, 129.0, 128.5, 127.8, 116.0, 71.0, 59.8, 53.8, 53.6, 50.9, 44.3; IR (Neat Film, NaCl) 3010, 2952, 1738, 1652, 1495, 1435, 1269, 1227, 1169, 1098, 1064, 977, 921, 862, 842, 799, 765  $\text{cm}^{-1}$ ; HRMS (MM: ESI-APCI)  $m/z$  calc'd for  $\text{C}_{17}\text{H}_{20}\text{NO}_4\text{S}$   $[\text{M}+\text{H}]^+$ : 334.1108, found 334.1113.

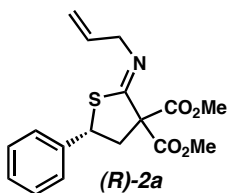

**(R,Z)-dimethyl 2-(allylimino)-5-phenyldihydrothiophene-3,3(2H)-dicarboxylate ((R)-2a):** Characterization data is same as above;  $[\alpha]_D^{25.0} 8.8^\circ$  ( $c$  0.445,  $\text{CHCl}_3$ , 95% ee).

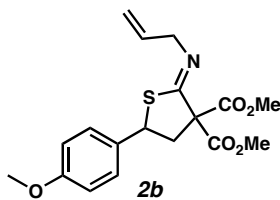

**dimethyl 1-allyl-5-(4-methoxyphenyl)-2-thioxopyrrolidine-3,3-dicarboxylate (2b):** 98% yield.  $R_f = 0.49$  (7:3 Hexanes:EtOAc eluent);  $^1\text{H NMR}$  (500 MHz,  $\text{CDCl}_3$ )  $\delta$  7.38–7.32 (m, 2H), 6.90–6.85 (m, 2H), 6.03–5.92 (m, 1H), 5.24 (dq,  $J = 17.2, 1.8$  Hz, 1H), 5.12 (dq,  $J = 10.4, 1.7$  Hz, 1H), 4.71 (dd,  $J = 11.8, 4.8$  Hz, 1H), 3.99 (dt,  $J = 5.2, 1.8$  Hz, 2H), 3.87 (s, 3H), 3.81 (s, 3H), 3.80 (s, 3H), 3.07 (dd,  $J = 13.0, 4.9$  Hz, 1H), 2.87 (dd,  $J = 13.0, 11.8$  Hz, 1H);  $^{13}\text{C NMR}$  (126 MHz,  $\text{CDCl}_3$ )  $\delta$  168.4, 168.1, 166.5, 159.7, 134.0, 130.0, 129.0, 116.0, 114.3, 71.1, 59.7, 55.5, 53.8, 53.6, 50.6, 44.5; IR (Neat Film, NaCl) 3003, 2953, 2837, 1736, 1638, 1610, 1513, 1435, 1305, 1250, 1175, 1098, 1070, 1032, 922, 831, 792  $\text{cm}^{-1}$ ; HRMS (Low Voltage MM: ESI-APCI)  $m/z$  calc'd for  $\text{C}_{18}\text{H}_{22}\text{NO}_5\text{S}$   $[\text{M}+\text{H}]^+$ : 364.1213, found 364.1193.

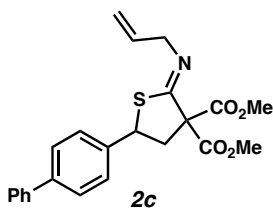

**(Z)-dimethyl 5-([1,1'-biphenyl]-4-yl)-2-(allylimino)dihydrothiophene-3,3(2H)-dicarboxylate (2c):** 80% yield.  $R_f = 0.53$  (7:3 Hexanes:EtOAc eluent);  $^1\text{H NMR}$  (500 MHz,  $\text{CDCl}_3$ )  $\delta$  7.62–7.56 (m, 4H), 7.53–7.49 (m, 2H), 7.48–7.42 (m, 2H), 7.39–7.33 (m, 1H), 6.00 (ddt,  $J = 17.2, 10.4, 5.2$  Hz, 1H), 5.27 (dq,  $J = 17.1, 1.8$  Hz, 1H), 5.14 (dq,  $J = 10.3, 1.7$  Hz, 1H), 4.79 (dd,  $J = 11.7, 4.9$  Hz, 1H), 4.02 (dt,  $J = 5.2, 1.8$  Hz, 2H), 3.89 (s, 3H), 3.83 (s, 3H), 3.16 (dd,  $J = 13.0, 4.9$  Hz, 1H), 2.94 (dd,  $J = 13.0, 11.7$  Hz, 1H);  $^{13}\text{C NMR}$  (126 MHz,  $\text{CDCl}_3$ )  $\delta$  168.3, 168.0, 166.2, 141.4, 140.4, 137.0, 133.8, 128.9, 128.2, 127.6, 127.1, 116.0, 71.0, 59.6, 53.7, 53.5, 50.6, 44.2; IR (Neat Film, NaCl) 3029, 2952, 1736, 1651, 1639, 1487, 1435, 1412, 1279, 1263, 1226, 1168, 1099, 1070, 1008, 977, 920, 836, 799, 767, 738  $\text{cm}^{-1}$ ; HRMS (Low Voltage MM: ESI-APCI)  $m/z$  calc'd for  $\text{C}_{23}\text{H}_{24}\text{NO}_4\text{S}$   $[\text{M}+\text{H}]^+$ : 410.1421, found 410.1408.

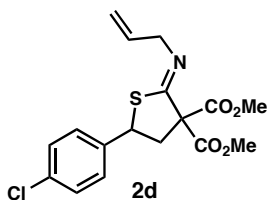

**(Z)-dimethyl 2-(allylimino)-5-(4-chlorophenyl)dihydrothiophene-3,3(2H)-dicarboxylate (2d):** 66% yield.  $R_f = 0.49$  (7:3 Hexanes:EtOAc eluent);  $^1\text{H NMR}$  (400 MHz,  $\text{CDCl}_3$ )  $\delta$  7.42 – 7.19 (m, 4H), 5.97 (ddt,  $J = 17.1, 10.4, 5.1$  Hz, 1H), 5.23 (dq,  $J = 17.2, 1.9$  Hz, 1H), 5.12 (dq,  $J = 10.4, 1.7$  Hz, 1H), 4.69 (dd,  $J = 11.6, 4.9$  Hz, 1H), 3.98 (dt,  $J = 5.1, 1.8$  Hz, 2H), 3.86 (s, 3H), 3.79 (s, 3H), 3.09 (dd,  $J = 13.0, 5.0$  Hz, 1H), 2.82 (dd,  $J = 13.0, 11.6$  Hz, 1H);  $^{13}\text{C NMR}$  (101 MHz,  $\text{CDCl}_3$ )  $\delta$  168.1, 167.8, 165.3, 136.7, 134.2, 133.8, 129.0, 129.0, 115.9, 70.8, 59.7, 53.7, 53.4, 50.0, 44.1; IR (Neat Film, NaCl) 2953, 1733, 1652, 1637, 1491, 1434, 1266, 1221, 1167, 1090, 1068, 1011  $\text{cm}^{-1}$ ; HRMS (MM: ESI-APCI)  $m/z$  calc'd for  $\text{C}_{17}\text{H}_{19}^{35}\text{ClNO}_4\text{S}$   $[\text{M}+\text{H}]^+$ : 368.0718, found 368.0729.

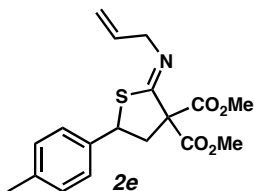

**(Z)-dimethyl 2-(allylimino)-5-(p-tolyl)dihydrothiophene-3,3(2H)-dicarboxylate (2e):** 99% yield.  $R_f = 0.47$  (7:3 Hexanes:EtOAc eluent);  $^1\text{H NMR}$  (500 MHz,  $\text{CDCl}_3$ )  $\delta$  7.33–7.29 (m, 2H), 7.19–7.15 (m, 2H), 5.98 (ddt,  $J = 17.2, 10.4, 5.2$  Hz, 1H), 5.25 (dq,  $J = 17.2, 1.8$  Hz, 1H), 5.14 (dq,  $J = 10.4, 1.7$  Hz, 1H), 4.72 (dd,  $J = 11.8, 4.8$  Hz, 1H), 4.01 (dt,  $J = 5.2, 1.8$  Hz, 2H), 3.88 (s, 3H), 3.82 (s, 3H), 3.10 (dd,  $J = 13.1, 4.9$  Hz, 1H), 2.88 (dd,  $J = 13.0, 11.8$  Hz, 1H), 2.35 (s, 3H);  $^{13}\text{C NMR}$  (126 MHz,  $\text{CDCl}_3$ )  $\delta$  168.2, 168.0, 138.5, 134.9, 133.7, 129.7, 127.7, 116.3, 71.1, 59.5, 53.9, 53.7, 51.1, 44.5, 21.3; IR (Neat Film, NaCl) 3011, 2952, 1737, 1652, 1639, 1515, 1435, 1278, 1269, 1257, 1228, 1169,

1071, 1018, 978, 921, 864, 848, 818, 790  $\text{cm}^{-1}$ ; HRMS (Low Voltage MM: ESI-APCI)  $m/z$  calc'd for  $\text{C}_{18}\text{H}_{22}\text{NO}_4\text{S}$   $[\text{M}+\text{H}]^+$ : 348.1264, found 348.1254.

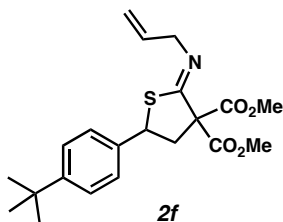

**(Z)-dimethyl 2-(allylimino)-5-(4-(tert-butyl)phenyl)dihydrothiophene-3,3(2H)-dicarboxylate (2f)**: 41% yield.  $R_f = 0.30$  (3:1 Hexanes:EtOAc eluent);  $^1\text{H}$  NMR (500 MHz,  $\text{CDCl}_3$ )  $\delta$  7.41–7.32 (m, 4H), 5.98 (ddt,  $J = 17.1, 10.4, 5.2$  Hz, 1H), 5.25 (dq,  $J = 17.2, 1.8$  Hz, 1H), 5.13 (dq,  $J = 10.4, 1.7$  Hz, 1H), 4.71 (dd,  $J = 11.8, 4.9$  Hz, 1H), 3.99 (dt,  $J = 5.1, 1.7$  Hz, 2H), 3.88 (s, 3H), 3.81 (s, 3H), 3.07 (dd,  $J = 13.0, 4.9$  Hz, 1H), 2.90 (dd,  $J = 13.0, 11.8$  Hz, 1H) 1.31 (s, 9H);  $^{13}\text{C}$  NMR (126 MHz,  $\text{CDCl}_3$ )  $\delta$  168.5, 168.2, 166.3, 151.6, 135.1, 134.1, 127.5, 125.9, 116.0, 71.1, 59.8, 53.8, 53.6, 50.7, 44.3, 34.8, 31.4; IR (Neat Film, NaCl) 2955, 2904, 2868, 1737, 1652, 1639, 1509, 1435, 1363, 1280, 1267, 1227, 1168, 1111, 1070, 1016, 978, 920, 828  $\text{cm}^{-1}$ ; HRMS (Low Voltage MM: ESI-APCI)  $m/z$  calc'd for  $\text{C}_{21}\text{H}_{28}\text{NO}_4\text{S}$   $[\text{M}+\text{H}]^+$ : 390.1734, found 390.1726.

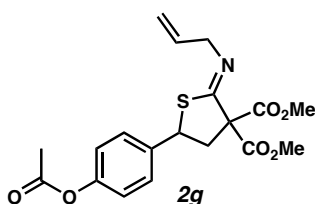

**(Z)-dimethyl 5-(4-acetoxyphenyl)-2-(allylimino)dihydrothiophene-3,3(2H)-dicarboxylate (2g)**: 84% yield.  $R_f = 0.20$  (3:1 Hexanes:EtOAc eluent);  $^1\text{H}$  NMR (500 MHz,  $\text{CDCl}_3$ )  $\delta$  7.49–7.41 (m, 2H), 7.12–7.05 (m, 2H), 5.97 (ddt,  $J = 17.2, 10.3, 5.2$  Hz, 1H), 5.25 (dq,  $J = 17.2, 1.8$  Hz, 1H), 5.13 (dq,  $J = 10.4, 1.7$  Hz, 1H), 4.72 (dd,  $J = 11.6, 4.9$  Hz, 1H), 3.99 (ddd,  $J = 7.0, 1.7, 1.0$  Hz, 2H), 3.87 (s, 3H), 3.80 (s, 3H), 3.11 (dd,  $J = 13.1, 4.9$  Hz, 1H), 2.85 (dd,  $J = 13.1, 11.6$  Hz, 1H), 2.30 (s, 3H);  $^{13}\text{C}$  NMR (126 MHz,  $\text{CDCl}_3$ )  $\delta$  169.5, 168.4, 168.0, 165.8, 150.6, 135.8, 134.0, 129.0, 122.2, 116.0, 71.0, 59.8, 53.8, 53.6, 50.3, 44.5, 21.3; IR (Neat Film, NaCl) 2953, 1736, 1649, 1639, 1507, 1436, 1370, 1280, 1257, 1194, 1167, 1099, 1016, 911, 851  $\text{cm}^{-1}$ ; HRMS (Low Voltage MM: ESI-APCI)  $m/z$  calc'd for  $\text{C}_{19}\text{H}_{22}\text{NO}_6\text{S}$   $[\text{M}+\text{H}]^+$ : 392.1162, found 392.1159.

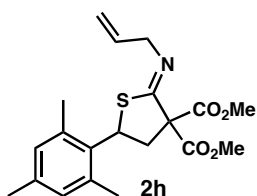

**(Z)-dimethyl 2-(allylimino)-5-mesityldihydrothiophene-3,3(2H)-dicarboxylate (2h)**: 85% yield. White, translucent crystals were obtained by slow diffusion of 1% benzene in heptane into a solution of thioimidate **2h** in ethyl acetate, M.P.: 89–91  $^\circ\text{C}$ ;  $R_f = 0.52$  (7:3 Hexanes:EtOAc eluent);  $^1\text{H}$  NMR (500 MHz,  $\text{CDCl}_3$ )  $\delta$  6.87–6.84 (m, 2H), 5.99 (ddt,  $J =$



17.2, 10.4, 5.2 Hz, 1H), 5.32 (dd,  $J = 12.5, 5.3$  Hz, 1H), 5.24 (dq,  $J = 17.2, 1.8$  Hz, 1H), 5.13 (dq,  $J = 10.4, 1.7$  Hz, 1H), 4.02 (dtd,  $J = 5.2, 1.8, 0.8$  Hz, 2H), 3.90 (s, 3H), 3.84 (s, 3H), 3.24 (dd,  $J = 13.3, 12.5$  Hz, 1H), 2.93 (dd,  $J = 13.3, 5.3$  Hz, 1H), 2.46 (s, 6H), 2.25 (s, 3H);  $^{13}\text{C}$  NMR (126 MHz,  $\text{CDCl}_3$ )  $\delta$  168.5, 168.3, 166.8, 137.9, 134.0, 130.9, 129.2, 116.0, 71.1, 59.8, 53.8, 53.6, 46.2, 40.0, 21.3, 20.9; IR (Neat Film, NaCl) 3010, 2952, 2918, 1737, 1649, 1638, 1611, 1435, 1267, 1230, 1203, 1167, 1097, 1073, 1015, 976, 921, 954, 822, 799, 774, 739  $\text{cm}^{-1}$ ; HRMS (Low Voltage MM: ESI-APCI)  $m/z$  calc'd for  $\text{C}_{20}\text{H}_{26}\text{NO}_4\text{S}$   $[\text{M}+\text{H}]^+$ : 376.1577, found 376.1563.

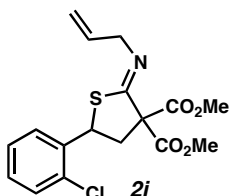

**(Z)-dimethyl 2-(allylimino)-5-(2-chlorophenyl)dihydrothiophene-3,3(2H)-dicarboxylate (2i)**: 84% yield.  $R_f = 0.48$  (7:3 Hexanes:EtOAc eluent);  $^1\text{H}$  NMR (500 MHz,  $\text{CDCl}_3$ )  $\delta$  7.65 (dd,  $J = 7.8, 1.7$  Hz, 1H), 7.38 (dd,  $J = 7.9, 1.4$  Hz, 1H), 7.31 (td,  $J = 7.6, 1.4$  Hz, 1H), 7.23 (td,  $J = 7.6, 1.7$ , 1H), 5.98 (ddt,  $J = 17.2, 10.4, 5.2$  Hz, 1H), 5.30–5.22 (m, 2H), 5.14 (dq,  $J = 10.4, 1.7$  Hz, 1H), 4.03 (td,  $J = 4.4, 2.0$  Hz, 2H), 3.88 (s, 3H), 3.77 (s, 3H), 3.19 (dd,  $J = 13.0, 5.1$  Hz, 1H), 2.84 (dd,  $J = 13.0, 11.0$  Hz, 1H);  $^{13}\text{C}$  NMR (126 MHz,  $\text{CDCl}_3$ )  $\delta$  168.1, 168.0, 165.7, 135.8, 134.0, 133.9, 130.0, 129.5, 128.5, 127.5, 116.1, 70.6, 59.7, 53.8, 53.6, 47.0, 42.6; IR (Neat Film, NaCl) 3011, 2953, 1737, 1651, 1639, 1435, 1279, 1256, 1228, 1171, 1130, 1100, 1069, 1051, 1038, 977, 921, 760  $\text{cm}^{-1}$ ; HRMS (Low Voltage MM: ESI-APCI)  $m/z$  calc'd for  $\text{C}_{17}\text{H}_{19}^{35}\text{ClNO}_4\text{S}$   $[\text{M}+\text{H}]^+$ : 368.0718, found 368.0700.

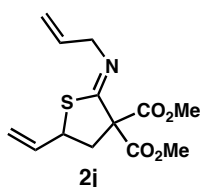

**(Z)-dimethyl 2-(allylimino)-5-vinyldihydrothiophene-3,3(2H)-dicarboxylate (2j)**: 99% yield.  $R_f = 0.45$  (7:3 Hexanes:EtOAc eluent);  $^1\text{H}$  NMR (500 MHz,  $\text{CDCl}_3$ )  $\delta$  5.95 (ddt,  $J = 17.2, 10.4, 5.2$  Hz, 1H), 5.80 (ddd,  $J = 16.9, 10.0, 8.4$  Hz, 1H), 5.33 (dq,  $J = 16.9, 0.8$  Hz, 1H), 5.23 (ddd,  $J = 17.3, 1.8, 0.6$  Hz, 1H), 5.19 (d,  $J = 10.1$ , 1H), 5.13 (ddd,  $J = 10.4, 1.7, 0.7$  Hz, 1H), 4.22 (m, 1H), 3.98 (dd,  $J = 5.2, 2.0$  Hz, 2H), 3.84 (s, 3H), 3.81 (d,  $J = 0.6$  Hz, 3H), 2.97 (ddd,  $J = 13.1, 5.1, 0.8$  Hz, 1H), 2.61 (dd,  $J = 13.1, 10.6$  Hz, 1H);  $^{13}\text{C}$  NMR (126 MHz,  $\text{CDCl}_3$ )  $\delta$  168.1, 168.0, 135.7, 133.6, 118.9, 116.3, 70.5, 59.4, 53.8, 53.7, 50.3, 42.2; IR (Neat Film, NaCl) 2952, 1735, 1649, 1638, 1434, 1328, 1272, 1254, 1169, 1139, 1097, 1068, 987, 923, 859, 787, 728  $\text{cm}^{-1}$ ; HRMS (Low Voltage MM: ESI-APCI)  $m/z$  calc'd for  $\text{C}_{13}\text{H}_{18}\text{NO}_4\text{S}$   $[\text{M}+\text{H}]^+$ : 284.0951, found 284.0962.

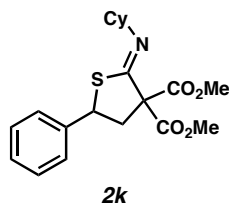

**(Z)-dimethyl 2-(cyclohexylimino)-5-phenyldihydrothiophene-3,3(2H)-dicarboxylate (2k):** 91% yield.  $R_f = 0.40$  (3:1 Hexanes:EtOAc eluent);  $^1\text{H NMR}$  (500 MHz,  $\text{CDCl}_3$ )  $\delta$  7.46–7.42 (m, 2H), 7.36 (ddd,  $J = 8.2, 7.1, 0.9$  Hz, 2H), 7.30 (m, 1H), 4.69 (dd,  $J = 11.7, 4.9$  Hz, 1H), 3.87 (s, 3H), 3.78 (s, 3H), 3.08 (dd,  $J = 13.0, 4.9$  Hz, 1H), 2.98 (tt,  $J = 10.1, 3.6$  Hz, 1H), 2.85 (dd,  $J = 13.0, 11.7$  Hz, 1H), 1.85–1.72 (m, 4H), 1.65–1.57 (m, 1H), 1.57–1.44 (m, 2H), 1.37–1.20 (m, 4H);  $^{13}\text{C NMR}$  (126 MHz,  $\text{CDCl}_3$ )  $\delta$  168.6, 168.3, 161.5, 138.6, 128.9, 128.4, 127.8, 70.8, 67.1, 53.7, 53.4, 50.6, 44.0, 32.8, 31.7, 25.8, 24.7, 24.6; IR (Neat Film, NaCl) 2930, 2854, 1738, 1651, 1435, 1168, 1067, 973, 912, 764  $\text{cm}^{-1}$ ; HRMS (ESI)  $m/z$  calc'd for  $\text{C}_{20}\text{H}_{26}\text{NO}_4\text{S}$   $[\text{M}+\text{H}]^+$ : 376.1577, found 356.1589.

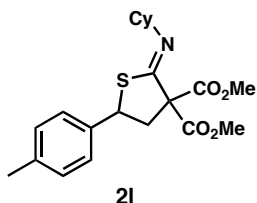

**(Z)-dimethyl 2-(cyclohexylimino)-5-(p-tolyl)dihydrothiophene-3,3(2H)-dicarboxylate (2l):** 99% yield.  $R_f = 0.63$  (2:1 Hexanes: EtOAc eluent);  $^1\text{H NMR}$  (500 MHz,  $\text{CDCl}_3$ )  $\delta$  7.35–7.29 (m, 2H), 7.18–7.14 (m, 2H), 4.67 (dd,  $J = 11.8, 4.8$  Hz, 1H), 3.86 (s, 3H), 3.78 (s, 3H), 3.05 (dd,  $J = 13.0, 4.9$  Hz, 1H), 2.98 (tt,  $J = 10.1, 3.6$  Hz, 1H), 2.83 (dd,  $J = 13.0, 11.8$  Hz, 1H), 2.35 (s, 3H), 1.83–1.72 (m, 4H), 1.65–1.57 (m, 1H), 1.56–1.44 (m, 2H), 1.38–1.21 (m, 3H);  $^{13}\text{C NMR}$  (126 MHz,  $\text{CDCl}_3$ )  $\delta$  168.7, 168.3, 161.5, 138.2, 135.5, 129.6, 127.6, 70.9, 67.0, 53.6, 53.4, 50.4, 44.0, 32.8, 31.7, 25.8, 24.7, 24.5, 21.2; IR (Neat Film, NaCl) 2929, 2853, 1735, 1648, 1434, 1255, 1167, 1071, 973, 818  $\text{cm}^{-1}$ ; HRMS (APCI)  $m/z$  calc'd for  $\text{C}_{21}\text{H}_{28}\text{NO}_4\text{S}$   $[\text{M}+\text{H}]^+$ : 390.1734, found 390.1738.

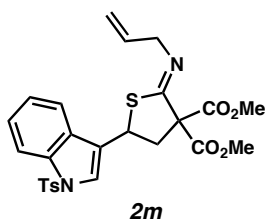

**(Z)-dimethyl 2-(allylimino)-5-(1-tosyl-1H-indol-3-yl)dihydrothiophene-3,3(2H)-dicarboxylate (XX):** 77% yield.  $R_f = 0.80$  (1:1 Hexanes:EtOAc eluent);  $^1\text{H NMR}$  (500 MHz,  $\text{CDCl}_3$ )  $\delta$  168.1, 167.9, 166.2, 145.4, 135.5, 135.1, 133.6, 130.2, 128.9, 127.1, 125.5, 123.9, 123.5, 119.9, 116.3, 114.0, 77.4, 70.5, 59.7, 53.9, 53.7, 42.7, 41.7, 21.7;  $^{13}\text{C NMR}$  (126 MHz,  $\text{CDCl}_3$ )  $\delta$  168.1, 167.9, 166.2, 145.4, 135.5, 135.1, 133.6, 130.2, 128.9, 127.1, 125.5, 123.9, 123.5, 119.9, 116.3, 114.0, 77.4, 70.5, 59.7, 53.9, 53.7, 42.7, 41.7, 21.7; IR (Neat Film, NaCl) 2953, 1738, 1639, 1447, 1372, 1275, 1175, 1126, 1095, 974, 912, 733  $\text{cm}^{-1}$ ; HRMS (ESI)  $m/z$  calc'd for  $\text{C}_{26}\text{H}_{27}\text{N}_2\text{O}_6\text{S}_2$   $[\text{M}+\text{H}]^+$ : 527.1305, found 527.1298.

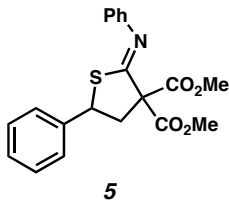**(Z)-dimethyl 5-phenyl-2-(phenylimino)dihydrothiophene-3,3(2H)-dicarboxylate (5):**

Prepared using General Method F, using phenylisothiocyanate. 89% yield.  $R_f = 0.60$  (3:1 Hexanes:EtOAc eluent);  $^1\text{H NMR}$  (500 MHz,  $\text{CDCl}_3$ )  $\delta$  7.41–7.37 (m, 2H), 7.36–7.31 (m, 4H), 7.30–7.27 (m, 1H), 7.16–7.11 (m, 1H), 7.05–7.01 (m, 2H), 4.76 (dd,  $J = 11.7, 4.9$  Hz, 1H), 3.97 (s, 3H), 3.87 (s, 3H), 3.19 (dd,  $J = 13.1, 4.9$  Hz, 1H), 2.99 (dd,  $J = 13.1, 11.7$  Hz, 1H);  $^{13}\text{C NMR}$  (126 MHz,  $\text{CDCl}_3$ )  $\delta$  168.3, 167.9, 167.8, 151.0, 137.8, 129.1, 129.0, 128.5, 127.8, 125.3, 120.2, 71.4, 54.0, 53.8, 51.2, 43.9; IR (Neat Film, NaCl) 3030, 2952, 1735, 1638, 1593, 1486, 1434, 1268, 1224, 1170, 1063, 973, 763  $\text{cm}^{-1}$ ; HRMS (ESI)  $m/z$  calc'd for  $\text{C}_{20}\text{H}_{20}\text{NO}_4\text{S}$   $[\text{M}+\text{H}]^+$ : 370.1108, found 370.1098.

**Characterization Data for Amidines**

All amidines were synthesized according to General Method E.

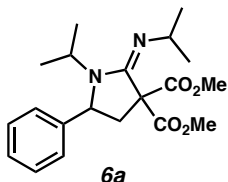

**(E)-dimethyl 1-isopropyl-2-(isopropylimino)-5-phenylpyrrolidine-3,3-dicarboxylate (6a):** 98% yield.  $R_f = 0.39$  (9:1  $\text{CH}_2\text{Cl}_2$ :MeOH eluent);  $^1\text{H NMR}$  (400 MHz,  $\text{CDCl}_3$ )  $\delta$  7.37 – 7.18 (m, 5H), 4.52 (t,  $J = 7.1$  Hz, 1H), 3.99 (p,  $J = 6.8$  Hz, 1H), 3.79 (s, 3H), 3.70 (s, 3H), 3.50 (hept,  $J = 6.0$  Hz, 1H), 2.95 (dd,  $J = 12.8, 7.0$  Hz, 1H), 2.33 (dd,  $J = 12.8, 7.2$  Hz, 1H), 1.15 (d,  $J = 6.8$  Hz, 3H), 1.11 (d,  $J = 6.0$  Hz, 3H), 1.05 (d,  $J = 5.9$  Hz, 3H), 0.88 (d,  $J = 6.9$  Hz, 3H);  $^{13}\text{C NMR}$  (101 MHz,  $\text{CDCl}_3$ )  $\delta$  169.7, 169.2, 151.3, 143.8, 128.5, 127.8, 127.0, 60.5, 59.8, 53.1, 52.9, 51.4, 47.3, 43.4, 24.7, 24.3, 19.6, 19.2; IR (Neat Film, NaCl) 2963, 1731, 1659, 1436, 1261, 1212, 1063, 969  $\text{cm}^{-1}$ ; HRMS (MM: ESI-APCI)  $m/z$  calc'd for  $\text{C}_{20}\text{H}_{29}\text{N}_2\text{O}_4$   $[\text{M}+\text{H}]^+$ : 361.2122, found 361.2018.

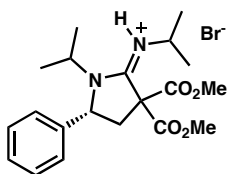

**(R,E)-dimethyl 1-isopropyl-2-(isopropylimino)-5-phenylpyrrolidine-3,3-dicarboxylate ((R)-6a·HBr):** Acetyl bromide (22  $\mu\text{L}$ , 0.3 mmol) was dissolved in dichloromethane (3 mL) in a 10 mL round bottom flask. Methanol (41  $\mu\text{L}$ , 1 mmol) was added to the solution and this mixture was transferred into a second flask containing a solution of amidine (R)-6a (72 mg, 0.2 mmol). The mixture was concentrated in vacuo and crystallized by vapor diffusion of diethyl ether into dichloromethane to produce fine colorless needles suitable for X-ray crystallography.  $[\alpha]_D^{25.0} 8.8^\circ$  (c 0.445,  $\text{CHCl}_3$ , >98% ee).

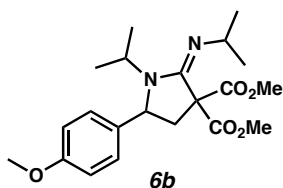

**(E)-dimethyl 1-isopropyl-2-(isopropylimino)-5-(4-methoxyphenyl)pyrrolidine-3,3-dicarboxylate (6b):** 98% yield.  $R_f = 0.42$  (9:1  $\text{CH}_2\text{Cl}_2$ :MeOH eluent);  $^1\text{H NMR}$  (400 MHz,  $\text{CDCl}_3$ )  $\delta$  7.25 – 7.16 (m, 2H), 6.89 – 6.79 (m, 2H), 4.50 (br t,  $J = 6.9$  Hz, 1H), 4.07 – 3.95 (br m, 1H), 3.79 (s, 3H), 3.77 (s, 3H), 3.72 (s, 3H), 3.49 (p,  $J = 6.0$  Hz, 1H), 2.93 (br dd,  $J = 12.8, 6.9$  Hz, 1H), 2.30 (br dd,  $J = 12.9, 7.3$  Hz, 1H), 1.14 (br d,  $J = 6.9$  Hz, 4H), 1.11 (d,  $J = 4.3$  Hz, 2H), 1.05 (d,  $J = 6.0$  Hz, 3H), 0.87 (d,  $J = 6.9$  Hz, 3H);  $^{13}\text{C NMR}$  (101 MHz,  $\text{CDCl}_3$ )  $\delta$  169.5, 169.0, 159.3, 151.6, 135.2, 128.2, 113.9, 60.7, 59.6, 55.3, 53.2, 53.0, 51.4, 47.4, 43.4, 24.5, 24.1, 19.7, 19.2; IR (Neat Film, NaCl) 2963,

2928, 1736, 1654, 1612, 1513, 1249, 1214, 1172, 1081  $\text{cm}^{-1}$ ; HRMS (MM: ESI-APCI)  $m/z$  calc'd for  $\text{C}_{21}\text{H}_{31}\text{N}_2\text{O}_5$   $[\text{M}+\text{H}]^+$ : 391.2227, found 391.2208.

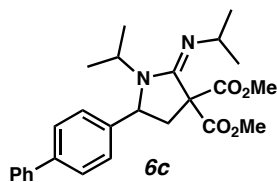

**(E)-dimethyl 5-([1,1'-biphenyl]-4-yl)-1-isopropyl-2-(isopropylimino)pyrrolidine-3,3-dicarboxylate (6c)**: 92% yield.  $R_f = 0.42$  (9:1  $\text{CH}_2\text{Cl}_2$ :MeOH eluent);  $^1\text{H}$  NMR (500 MHz,  $\text{CDCl}_3$ )  $\delta$  7.63–7.53 (m, 4H), 7.47–7.38 (m, 4H), 7.37–7.32 (m, 1H), 4.59 (t,  $J = 7.1$  Hz, 1H), 4.04 (hept,  $J = 6.9$  Hz, 1H), 3.83 (s, 3H), 3.74 (s, 3H), 3.53 (hept,  $J = 5.9$  Hz, 1H), 3.00 (dd,  $J = 12.8, 7.0$  Hz, 1H), 2.37 (dd,  $J = 12.8, 7.3$  Hz, 1H), 1.20 (d,  $J = 6.8$  Hz, 3H), 1.15 (d,  $J = 6.0$  Hz, 3H), 1.08 (d,  $J = 5.9$  Hz, 3H), 0.95 (d,  $J = 6.9$  Hz, 3H);  $^{13}\text{C}$  NMR (126 MHz,  $\text{CDCl}_3$ )  $\delta$  169.7, 169.2, 151.4, 142.9, 140.8, 140.7, 128.9, 127.5, 127.4, 127.2, 127.1, 60.6, 59.6, 53.2, 53.0, 51.5, 47.4, 43.4, 24.7, 24.4, 19.8, 19.2; IR (Neat Film, NaCl) 2964, 1733, 1658, 1486, 1435, 1375, 1358, 1264, 1216, 1165, 1126, 1076, 1008, 973, 841, 767, 733  $\text{cm}^{-1}$ ; HRMS (MM: ESI-APCI)  $m/z$  calc'd for  $\text{C}_{26}\text{H}_{33}\text{N}_2\text{O}_4$   $[\text{M}+\text{H}]^+$ : 437.2435, found 437.2411.

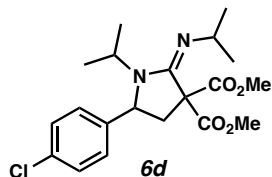

**(E)-dimethyl 5-(4-chlorophenyl)-1-isopropyl-2-(isopropylimino)pyrrolidine-3,3-dicarboxylate (6d)**: 78% yield.  $R_f = 0.40$  (9:1  $\text{CH}_2\text{Cl}_2$ :MeOH eluent);  $^1\text{H}$  NMR (500 MHz,  $\text{CDCl}_3$ )  $\delta$  7.30–7.23 (m, 4H), 4.50 (t,  $J = 7.1$  Hz, 1H), 4.00 (hept,  $J = 6.9$  Hz, 1H), 3.80 (s, 3H), 3.71 (s, 3H), 3.48 (hept,  $J = 5.9$  Hz, 1H), 2.95 (dd,  $J = 12.8, 7.1$  Hz, 1H), 2.27 (dd,  $J = 12.9, 7.1$  Hz, 1H), 1.13 (d,  $J = 6.7$  Hz, 3H), 1.09 (d,  $J = 6.0$  Hz, 3H), 1.04 (d,  $J = 5.9$  Hz, 3H), 0.86 (d,  $J = 6.9$  Hz, 3H);  $^{13}\text{C}$  NMR (126 MHz,  $\text{CDCl}_3$ )  $\delta$  169.6, 169.1, 151.2, 142.6, 133.4, 128.7, 128.3, 60.4, 59.1, 53.2, 53.0, 51.5, 47.3, 43.3, 24.7, 24.3, 19.9, 19.1; IR (Neat Film, NaCl) 2965, 1733, 1658, 1489, 1435, 1376, 1359, 1269, 1214, 1165, 1126, 1088, 1014, 974, 831  $\text{cm}^{-1}$ ; HRMS (MM: ESI-APCI)  $m/z$  calc'd for  $\text{C}_{20}\text{H}_{28}^{35}\text{ClN}_2\text{O}_4$   $[\text{M}+\text{H}]^+$ : 395.1732, found 395.1755.

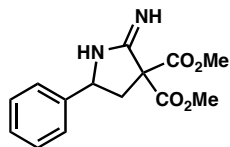

6e

**dimethyl 2-imino-5-phenylpyrrolidine-3,3-dicarboxylate (6e)**: 78% yield.  $R_f = 0.45$  (9:1  $\text{CH}_2\text{Cl}_2$ :MeOH eluent);  $^1\text{H}$  NMR (500 MHz,  $\text{CDCl}_3$ )  $\delta$  7.34–7.27 (m, 3H), 7.25–7.21 (m, 2H), 4.99 (dd,  $J = 8.2, 6.9$  Hz, 1H), 3.83 (s, 3H), 3.77 (s, 3H), 3.10 (dd,  $J = 13.6, 7.0$  Hz, 1H), 2.37 (dd,  $J = 13.6, 8.1$  Hz, 1H);  $^{13}\text{C}$  NMR (126 MHz,  $\text{CDCl}_3$ )  $\delta$  168.9, 168.3, 160.2, 144.2, 128.6, 127.1, 126.4, 68.4, 67.4, 53.6, 53.4, 42.8; IR (Neat Film, NaCl)

3449, 3028, 1729, 1665, 1600, 1435, 1386, 1354, 1279, 1243, 1201, 1154, 1114, 1075, 765  $\text{cm}^{-1}$ ; HRMS (FAB+)  $m/z$  calc'd for  $\text{C}_{14}\text{H}_{17}\text{N}_2\text{O}_4$   $[\text{M}+\text{H}]^+$ : 277.1188, found 277.1176.

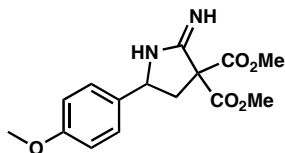

6f

**dimethyl 2-imino-5-(4-methoxyphenyl)pyrrolidine-3,3-dicarboxylate (6f)**: 68% yield.  $R_f = 0.47$  (9:1  $\text{CH}_2\text{Cl}_2$ :MeOH eluent);  $^1\text{H}$  NMR (500 MHz,  $\text{CDCl}_3$ )  $\delta$  7.23–7.16 (m, 2H), 6.84 (dd,  $J = 6.8, 1.9$  Hz, 2H), 4.97–4.88 (m, 1H), 3.82 (s, 3H), 3.78 (s, 3H), 3.76 (s, 3H), 3.06 (dd,  $J = 13.6, 6.9$  Hz, 1H) 2.34 (dd,  $J = 13.6, 8.1$  Hz, 1H);  $^{13}\text{C}$  NMR (126 MHz,  $\text{CDCl}_3$ )  $\delta$  168.9, 168.3, 160.1, 158.7, 136.3, 127.5, 113.9, 113.9, 67.8, 67.4, 55.4, 53.6, 53.4, 42.9; IR (Neat Film, NaCl) 3464, 3374, 3102, 2955, 2838, 1738, 1662, 1612, 1514, 1439, 1351, 1247, 1213, 1175, 1105, 1077, 1034, 831, 733  $\text{cm}^{-1}$ ; HRMS (FAB+)  $m/z$  calc'd for  $\text{C}_{15}\text{H}_{19}\text{N}_2\text{O}_5$   $[\text{M}+\text{H}]^+$ : 307.1294, found 307.1287.

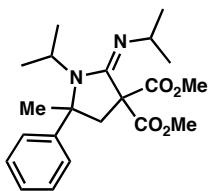

6g

**(E)-dimethyl 1-isopropyl-2-(isopropylimino)-5-methyl-5-phenylpyrrolidine-3,3-dicarboxylate (6g)**: 58% yield.  $R_f = 0.35$  (10:1  $\text{CHCl}_3$ :MeOH eluent);  $^1\text{H}$  NMR (500 MHz,  $\text{CDCl}_3$ )  $\delta$  7.48–7.44 (m, 2H), 7.38–7.33 (m, 2H), 7.29–7.24 (m, 1H), 3.85 (s, 3H), 3.71 (s, 3H), 3.44 (dt,  $J = 11.8, 5.9$  Hz, 1H), 3.09 ? 2.99 (hept,  $J = 6.7$  Hz, 1H), 2.83–2.72 (m, 2H), 1.61 (s, 3H), 1.35 (dd,  $J = 17.2, 6.7$  Hz, 6H), 1.10 (dd,  $J = 18.8, 5.9$  Hz, 6H);  $^{13}\text{C}$  NMR (126 MHz,  $\text{CDCl}_3$ )  $\delta$  170.5, 170.2, 148.5, 146.8, 128.3, 127.2, 126.7, 64.8, 60.3, 53.2, 53.1, 51.4, 50.5, 47.1, 24.9, 24.8, 24.5, 19.9, 19.1; IR (Neat Film, NaCl) 2963, 1731, 1654, 1375, 1251, 1217, 1090  $\text{cm}^{-1}$ ; HRMS (MM: ESI-APCI)  $m/z$  calc'd for  $\text{C}_{21}\text{H}_{31}\text{N}_2\text{O}_4$   $[\text{M}+\text{H}]^+$ : 375.2278, found 375.2297.

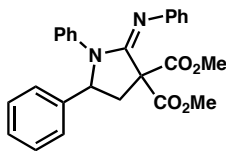

6h

**(E)-dimethyl 1,5-diphenyl-2-(phenylimino)pyrrolidine-3,3-dicarboxylate (6h)**: 79% yield.  $R_f = 0.32$  (10:1  $\text{CH}_2\text{Cl}_2$ :MeOH eluent);  $^1\text{H}$  NMR (400 MHz,  $\text{DMSO}-d_6$ , 80  $^\circ\text{C}$ )  $\delta$  7.34 – 7.16 (m, 8H), 7.10 (dt,  $J = 15.2, 7.6$  Hz, 5H), 6.95 (t,  $J = 7.4$  Hz, 1H), 6.80 (t,  $J = 7.3$  Hz, 1H), 6.71 (d,  $J = 7.7$  Hz, 2H), 5.28 (t,  $J = 7.0$  Hz, 1H), 3.66 (s, 3H) 3.45 (s, 3H), 3.17 (dd,  $J = 13.0, 7.2$  Hz, 1H), 3.05 (s, 1H), 2.71 (dd,  $J = 13.0, 6.9$  Hz, 1H);  $^{13}\text{C}$  NMR (101 MHz,  $\text{DMSO}-d_6$ , 100  $^\circ\text{C}$ )  $\delta$  168.5, 168.2, 152.0, 148.4, 148.3, 140.9, 129.6, 129.5, 129.4, 129.3, 129.2, 129.1, 129.0, 128.9, 128.8, 128.7, 128.2, 128.1, 128.0, 127.7,

127.5, 127.4, 127.3, 127.2, 126.6, 125.9, 124.6, 122.0, 121.9, 120.9, 64.1, 63.1, 62.7, 55.3, 54.5, 54.3, 53.4, 52.6, 52.4, 51.9, 43.0; IR (Neat Film, NaCl) 3062, 3027, 2948, 1730, 1661, 1592, 1493, 1372, 1263, 1051  $\text{cm}^{-1}$ ; HRMS (MM: ESI-APCI)  $m/z$  calc'd for  $\text{C}_{26}\text{H}_{25}\text{N}_2\text{O}_4$   $[\text{M}+\text{H}]^+$ : 429.1809, found 429.1825.

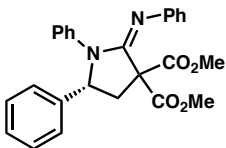

**(R)-6h**

**(R,E)-dimethyl 1,5-diphenyl-2-(phenylimino)pyrrolidine-3,3-dicarboxylate ((R)-6h):**  
Characterization data same as above;  $[\alpha]_{\text{D}}^{25.0}$   $36.7^\circ$  ( $c$  0.805,  $\text{CHCl}_3$ , 88% ee).

## Characterization data for Lactams

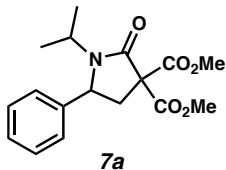

**dimethyl 1-isopropyl-2-oxo-5-phenylpyrrolidine-3,3-dicarboxylate (7a):** Prepared according to General Method F. 72% yield.  $R_f = 0.46$  (1:1 Hexanes:EtOAc eluent);  $^1\text{H}$  NMR (500 MHz,  $\text{CDCl}_3$ )  $\delta$  7.39–7.26 (m, 5H), 4.64 (t,  $J = 7.3$  Hz, 1H), 3.83 (s, 3H), 3.81 (s, 3H), 3.80–3.71 (m, 1H), 3.02 (dd,  $J = 13.8, 7.7$  Hz, 1H), 2.59 (dd,  $J = 13.8, 6.9$  Hz, 1H), 1.25 (d,  $J = 6.9$  Hz, 3H), 1.01 (d,  $J = 6.8$  Hz, 3H);  $^{13}\text{C}$  NMR (126 MHz,  $\text{CDCl}_3$ )  $\delta$  168.3, 168.1, 167.2, 141.0, 129.0, 128.6, 127.2, 63.4, 59.7, 53.7, 53.5, 47.1, 38.4, 19.8, 19.7; IR (Neat Film, NaCl) 2954, 1735, 1703, 1495, 1457, 1434, 1367, 1342, 1259, 1218, 1130, 1090, 1065, 998, 966, 919, 894, 774  $\text{cm}^{-1}$ ; HRMS (MM: ESI-APCI)  $m/z$  calc'd for  $\text{C}_{17}\text{H}_{22}\text{NO}_5$   $[\text{M}+\text{H}]^+$ : 320.1492, found 320.1490.

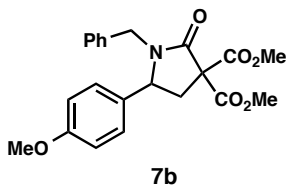

**dimethyl 1-butyl-2-oxo-5-(4-methoxyphenyl)pyrrolidine-3,3-dicarboxylate (7b):** Prepared according to General Method F. 62% yield.  $R_f = 0.39$  (1:1 Hexanes:EtOAc eluent);  $^1\text{H}$  NMR (500 MHz,  $\text{CDCl}_3$ )  $\delta$  7.30–7.23 (m, 3H), 7.08–7.02 (m, 4H), 6.94–6.87 (m, 2H), 5.11 (d,  $J = 14.5$  Hz, 1H), 4.31 (t,  $J = 7.6$  Hz, 1H), 3.87 (s, 3H), 3.84 (s, 3H), 3.81 (s, 3H), 3.46 (d,  $J = 14.6$  Hz, 1H), 2.94 (dd,  $J = 13.8, 7.2$  Hz, 1H), 2.65 (dd,  $J = 13.8, 8.1$  Hz, 1H);  $^{13}\text{C}$  NMR (126 MHz,  $\text{CDCl}_3$ )  $\delta$  168.1, 167.9, 167.1, 160.0, 135.5, 130.4, 128.8, 128.7, 128.6, 127.9, 114.6, 63.4, 58.3, 55.5, 53.7, 53.6, 45.2, 38.1; IR (Neat Film, NaCl) 2953, 1735, 1705, 1513, 1434, 1281, 1247  $\text{cm}^{-1}$ ; HRMS (MM: ESI-APCI)  $m/z$  calc'd for  $\text{C}_{22}\text{H}_{24}\text{NO}_6$   $[\text{M}+\text{H}]^+$ : 398.1598, found 398.1581.

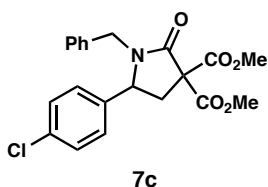

**dimethyl 1-butyl-2-oxo-5-(4-chlorophenyl)pyrrolidine-3,3-dicarboxylate (7c):** Prepared according to General Method F. 78% yield.  $R_f = 0.41$  (1:1 Hexanes:EtOAc eluent);  $^1\text{H}$  NMR (500 MHz,  $\text{CDCl}_3$ )  $\delta$  7.39–7.33 (m, 2H), 7.29–7.24 (m, 3H), 7.10–7.05 (m, 2H), 7.04–7.00 (m, 2H), 5.13 (d,  $J = 14.6$  Hz, 1H), 4.33 (t,  $J = 7.6$  Hz, 1H), 3.87 (s, 3H), 3.83 (s, 3H), 3.46 (d,  $J = 14.6$  Hz, 1H), 2.97 (dd,  $J = 13.9, 7.4$  Hz, 1H), 2.60 (dd,  $J = 13.9, 7.8$  Hz, 1H);  $^{13}\text{C}$  NMR (126 MHz,  $\text{CDCl}_3$ )  $\delta$  167.9, 167.7, 167.2, 137.3, 135.1, 134.7, 129.5, 128.8, 128.7, 128.6, 128.0, 63.2, 58.1, 53.8, 53.7, 45.3, 37.9; IR (Neat Film, NaCl) 2953, 1736, 1708, 1435, 1242, 1204, 1090  $\text{cm}^{-1}$ ; HRMS (MM: ESI-APCI)  $m/z$  calc'd for  $\text{C}_{21}\text{H}_{21}^{35}\text{ClNO}_5$   $[\text{M}+\text{H}]^+$ : 402.1103, found 402.1084.



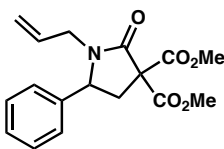

7d

**dimethyl 1-allyl-2-oxo-5-phenylpyrrolidine-3,3-dicarboxylate (7d):** Prepared according to General Method G. 42% yield.  $R_f = 0.52$  (1:1 Hexanes:EtOAc eluent);  $^1\text{H}$  NMR (500 MHz,  $\text{CDCl}_3$ )  $\delta$  7.42–7.29 (m, 3H), 7.24–7.18 (m, 2H), 5.71–5.52 (m, 1H), 5.12 (ddt,  $J = 10.1, 1.3, 0.7$  Hz, 1H), 4.99–4.91 (m, 1H), 4.64 (t,  $J = 7.5$  Hz, 1H), 4.40 (m, 1H), 3.90–3.84 (m, 3H), 3.82 (d,  $J = 0.9$  Hz, 3H), 3.15–3.02 (m, 2H), 2.62 (dd,  $J = 13.8, 7.4$  Hz, 1H);  $^{13}\text{C}$  NMR (126 MHz,  $\text{CDCl}_3$ )  $\delta$  168.0, 167.9, 166.8, 138.9, 131.0, 129.2, 128.8, 127.3, 118.9, 63.1, 59.1, 53.8, 53.6, 44.1, 38.0; IR (Neat Film, NaCl) 2953, 1735, 1707, 1433, 1245, 1214, 1070  $\text{cm}^{-1}$ ; HRMS (FAB+)  $m/z$  calc'd for  $\text{C}_{17}\text{H}_{20}\text{NO}_5$   $[\text{M}+\text{H}]^+$ : 318.1341, found 318.1356.

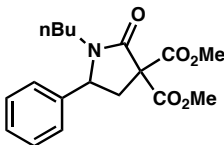

7e

**dimethyl 1-butyl-2-oxo-5-phenylpyrrolidine-3,3-dicarboxylate (7e):** Prepared according to General Method G. 58% yield.  $R_f = 0.10$  (4:1 Hexanes:EtOAc eluent);  $^1\text{H}$  NMR (500 MHz,  $\text{CDCl}_3$ )  $\delta$  7.40–7.31 (m, 3H), 7.25–7.20 (m, 2H), 4.63 (t,  $J = 7.5$  Hz, 1H), 3.84 (s, 3H), 3.81 (s, 3H), 3.70 (dt,  $J = 13.7, 7.9$  Hz, 1H), 3.06 (dd,  $J = 13.7, 7.3$  Hz, 1H), 2.57–2.53 (m, 2H), 1.43–1.30 (m, 2H), 1.29–1.10 (m, 2H), 0.82 (t,  $J = 7.3$  Hz, 3H);  $^{13}\text{C}$  NMR (126 MHz,  $\text{CDCl}_3$ )  $\delta$  168.1, 168.0, 166.9, 139.1, 129.2, 128.7, 127.1, 63.2, 59.5, 53.7, 53.6, 41.1, 38.3, 28.6, 19.8, 13.7; IR (Neat Film, NaCl) 2957, 2873, 1732, 1708, 1495, 1456, 1435, 1370, 1278, 1242, 1202, 1108, 1090, 1070, 893, 771  $\text{cm}^{-1}$ ; HRMS (FAB+)  $m/z$  calc'd for  $\text{C}_{18}\text{H}_{24}\text{NO}_5$   $[\text{M}+\text{H}]^+$ : 334.1654, found 334.1646.

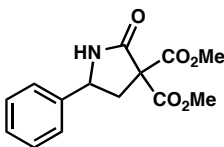

7f

**dimethyl 2-oxo-5-phenylpyrrolidine-3,3-dicarboxylate (7f):** Prepared according to General Method G. 49% yield.  $R_f = 0.48$  (1:1 Hexanes:EtOAc eluent);  $^1\text{H}$  NMR (500 MHz,  $\text{CDCl}_3$ )  $\delta$  7.40–7.33 (m, 2H), 7.33–7.28 (m, 3H), 6.93–6.69 (bs, 1H), 4.75 (t,  $J = 7.4$  Hz, 1H), 3.85 (d,  $J = 1.6$  Hz, 3H), 3.77 (dd,  $J = 2.1, 0.9$  Hz, 3H), 3.18 (ddt,  $J = 13.6, 7.2, 0.8$  Hz, 1H), 2.63 (ddd,  $J = 13.5, 7.8, 1.8$  Hz, 1H);  $^{13}\text{C}$  NMR (126 MHz,  $\text{CDCl}_3$ )  $\delta$  169.5, 167.5, 167.4, 140.3, 129.0, 128.4, 126.0, 63.2, 55.4, 53.7, 53.6, 40.4; IR (Neat Film, NaCl) 3251, 2955, 1729, 1435, 1250, 1208, 1060  $\text{cm}^{-1}$ ; HRMS (FAB+)  $m/z$  calc'd for  $\text{C}_{14}\text{H}_{16}\text{NO}_5$   $[\text{M}+\text{H}]^+$ : 278.1028, found 278.1042.

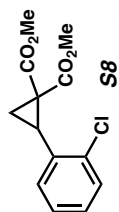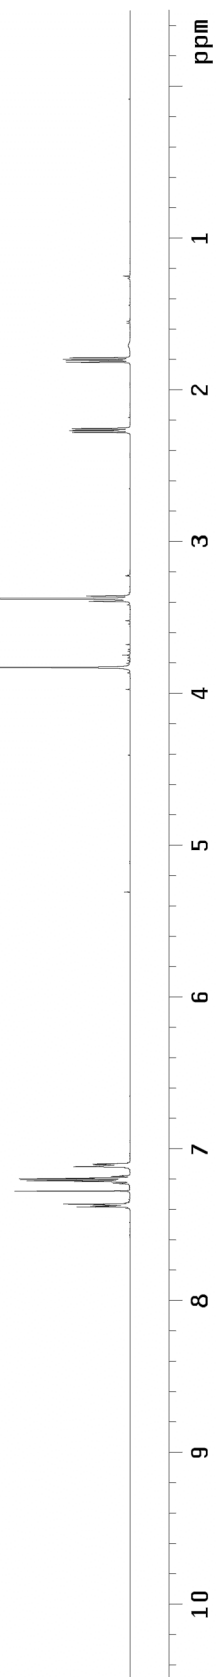

<sup>1</sup>H NMR (500 MHz, CDCl<sub>3</sub>) of compound **S8**.

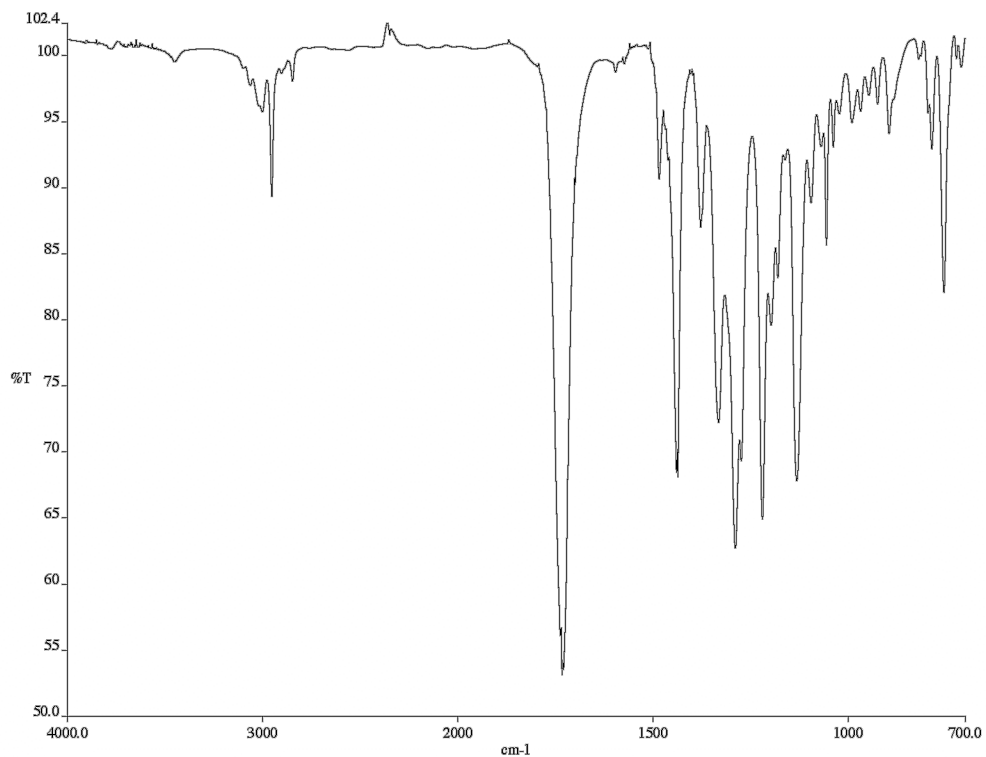

Infrared spectrum (thin film/NaCl) of compound **S8**.

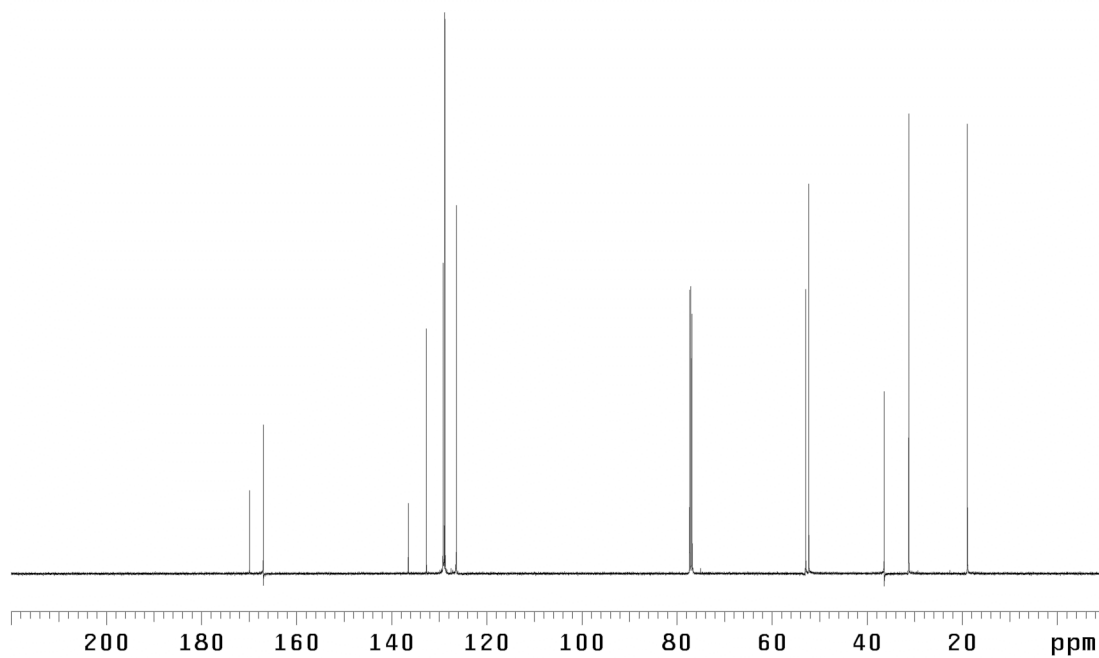

<sup>13</sup>C NMR (126 MHz, CDCl<sub>3</sub>) of compound **S8**.

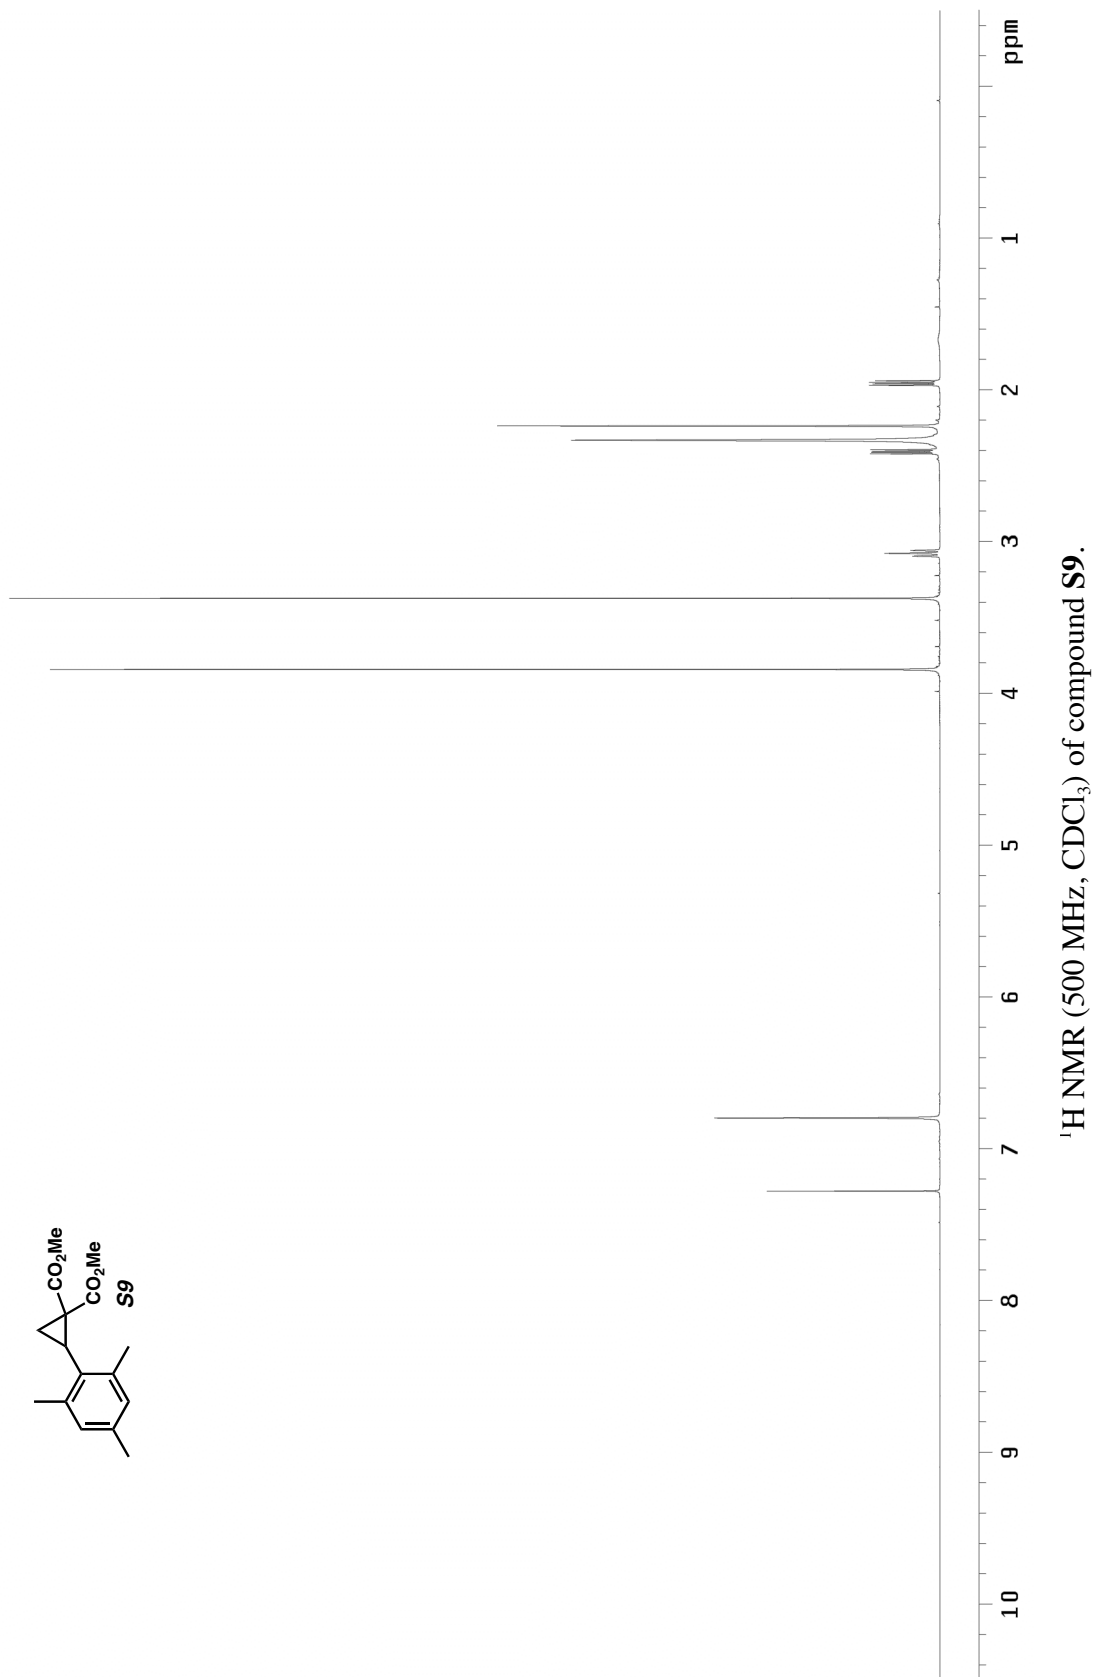

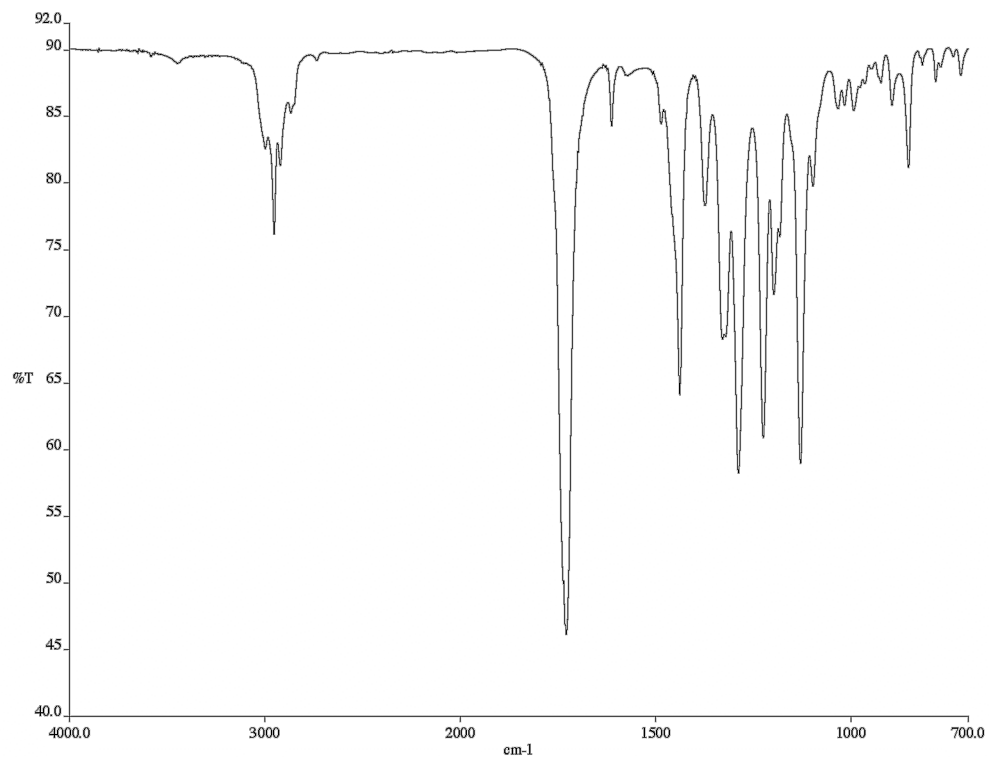

Infrared spectrum (thin film/NaCl) of compound **S9**.

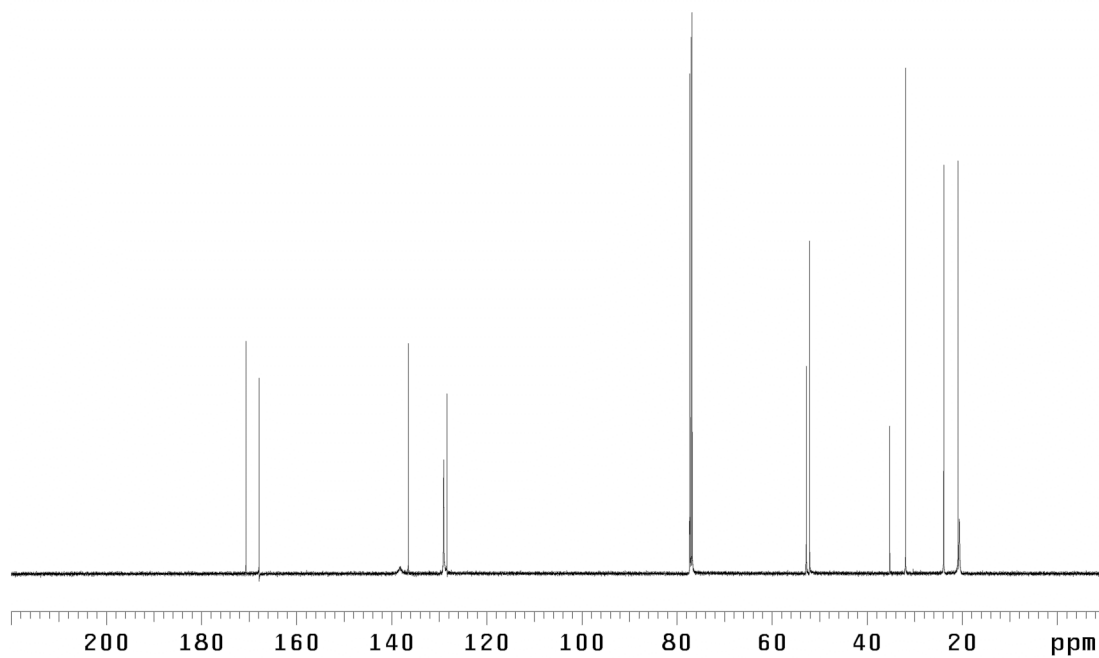

<sup>13</sup>C NMR (126 MHz, CDCl<sub>3</sub>) of compound **S9**.

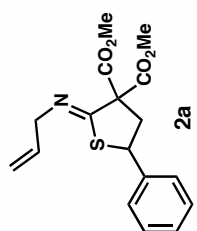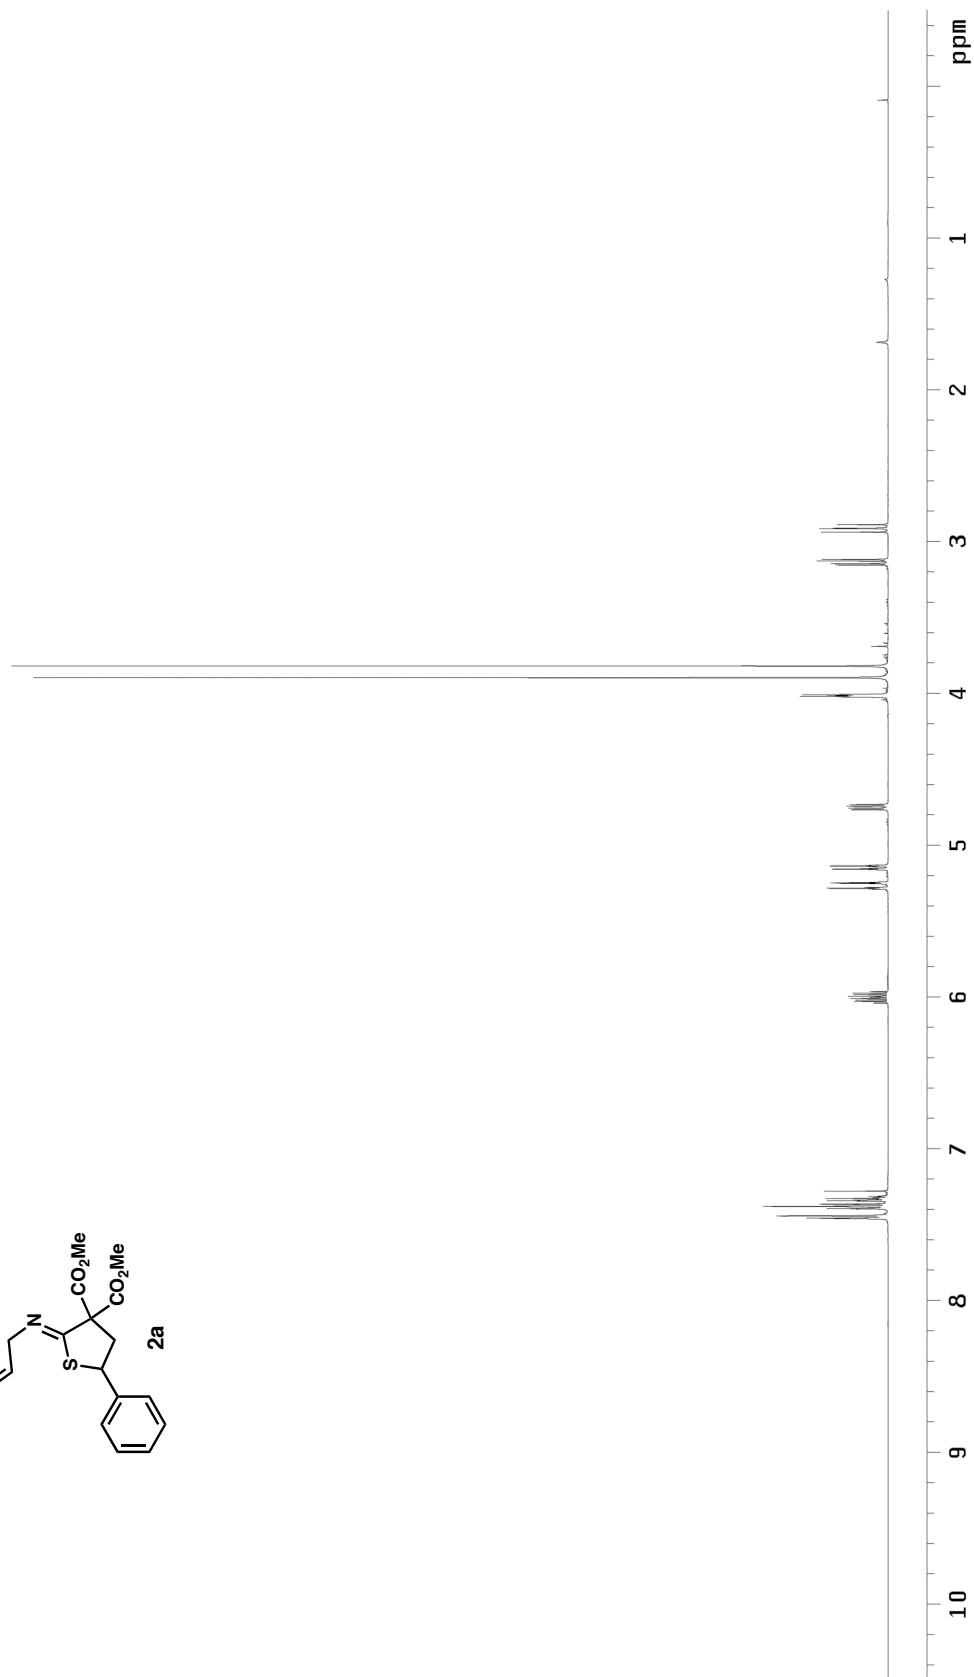

<sup>1</sup>H NMR (500 MHz, CDCl<sub>3</sub>) of compound **2a**.

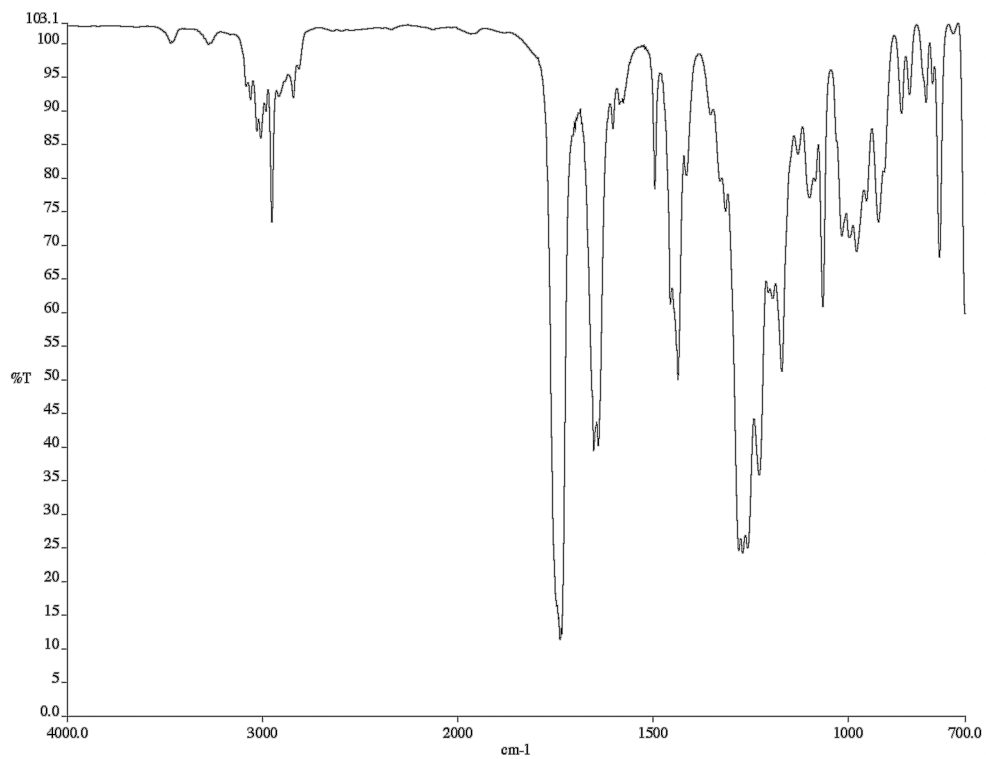Infrared spectrum (thin film/NaCl) of compound **2a**.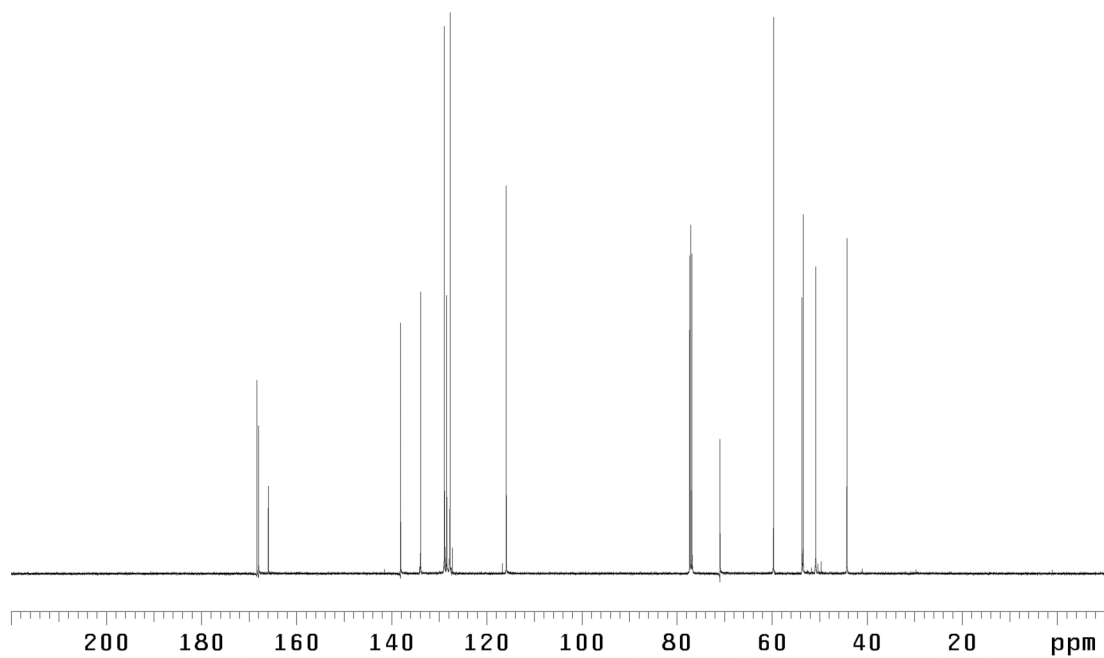<sup>13</sup>C NMR (126 MHz, CDCl<sub>3</sub>) of compound **2a**.

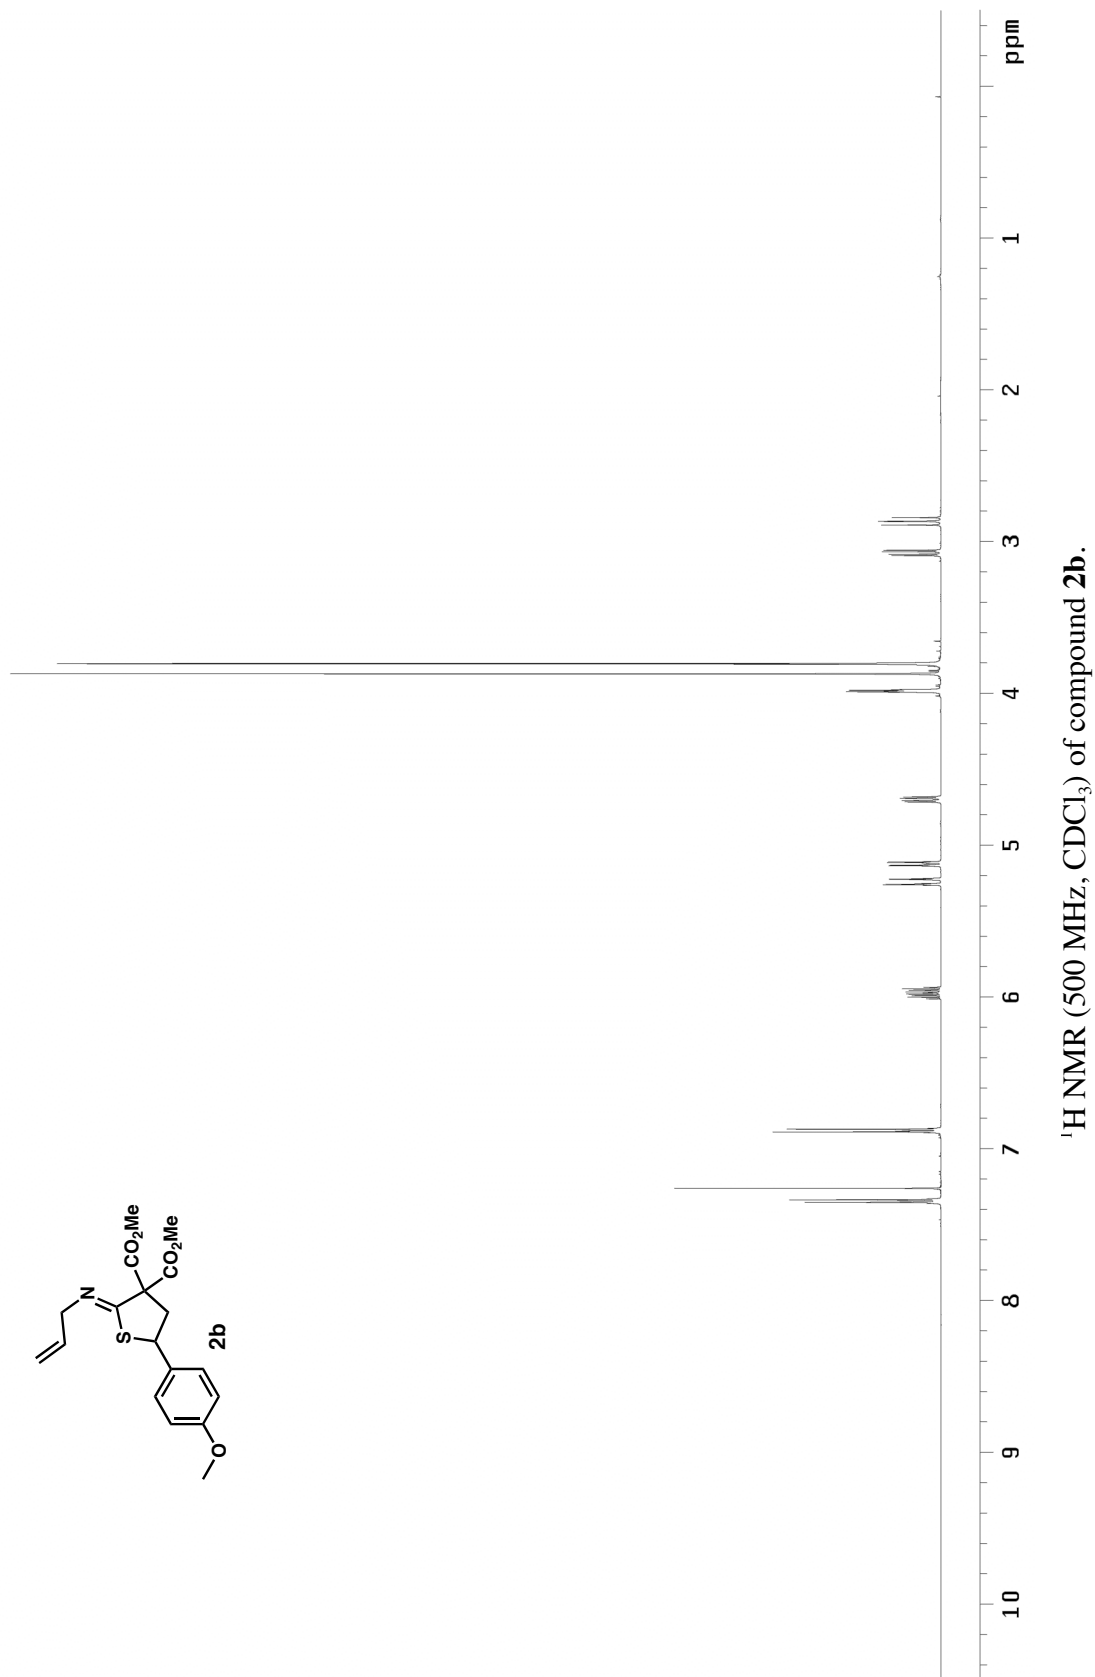



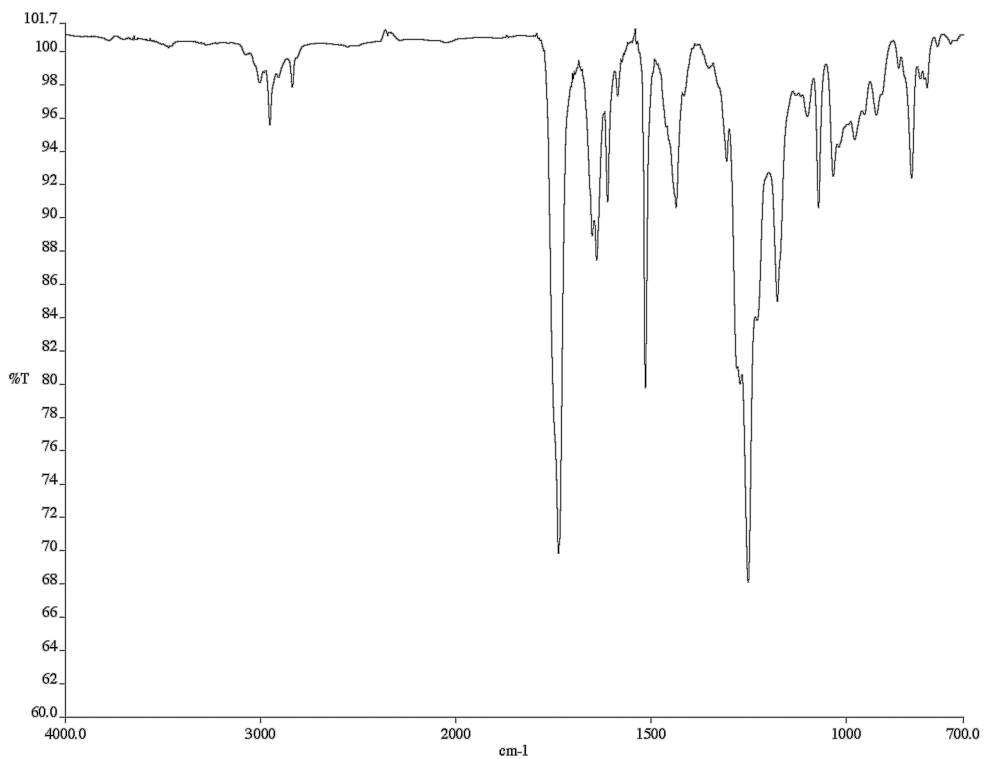Infrared spectrum (thin film/NaCl) of compound **2b**.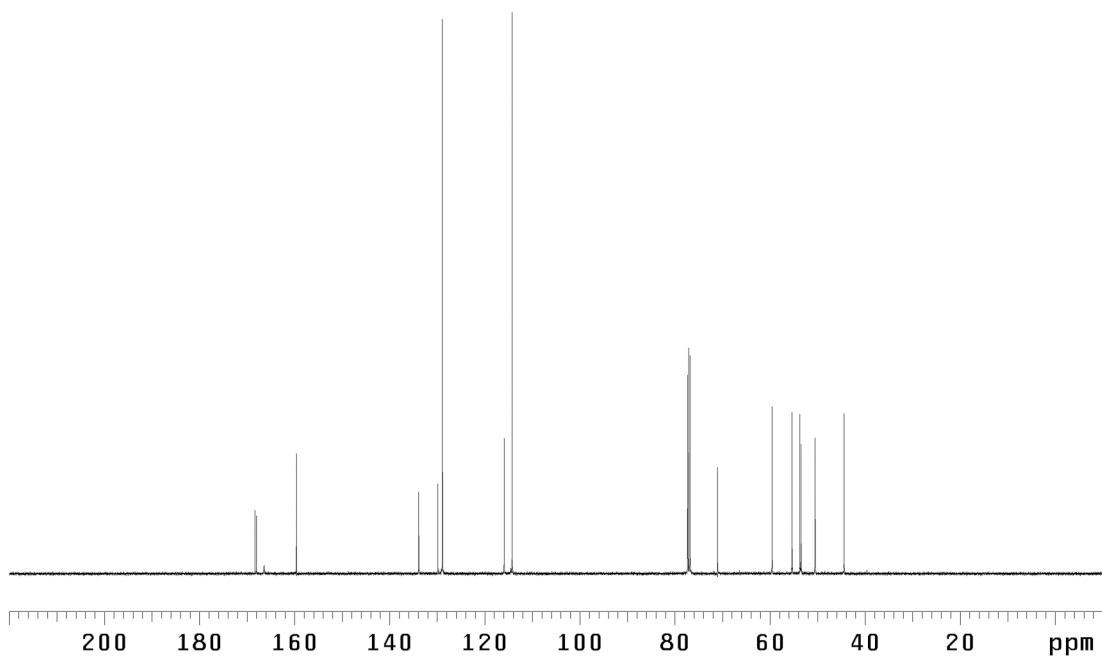<sup>13</sup>C NMR (126 MHz, CDCl<sub>3</sub>) of compound **2b**.

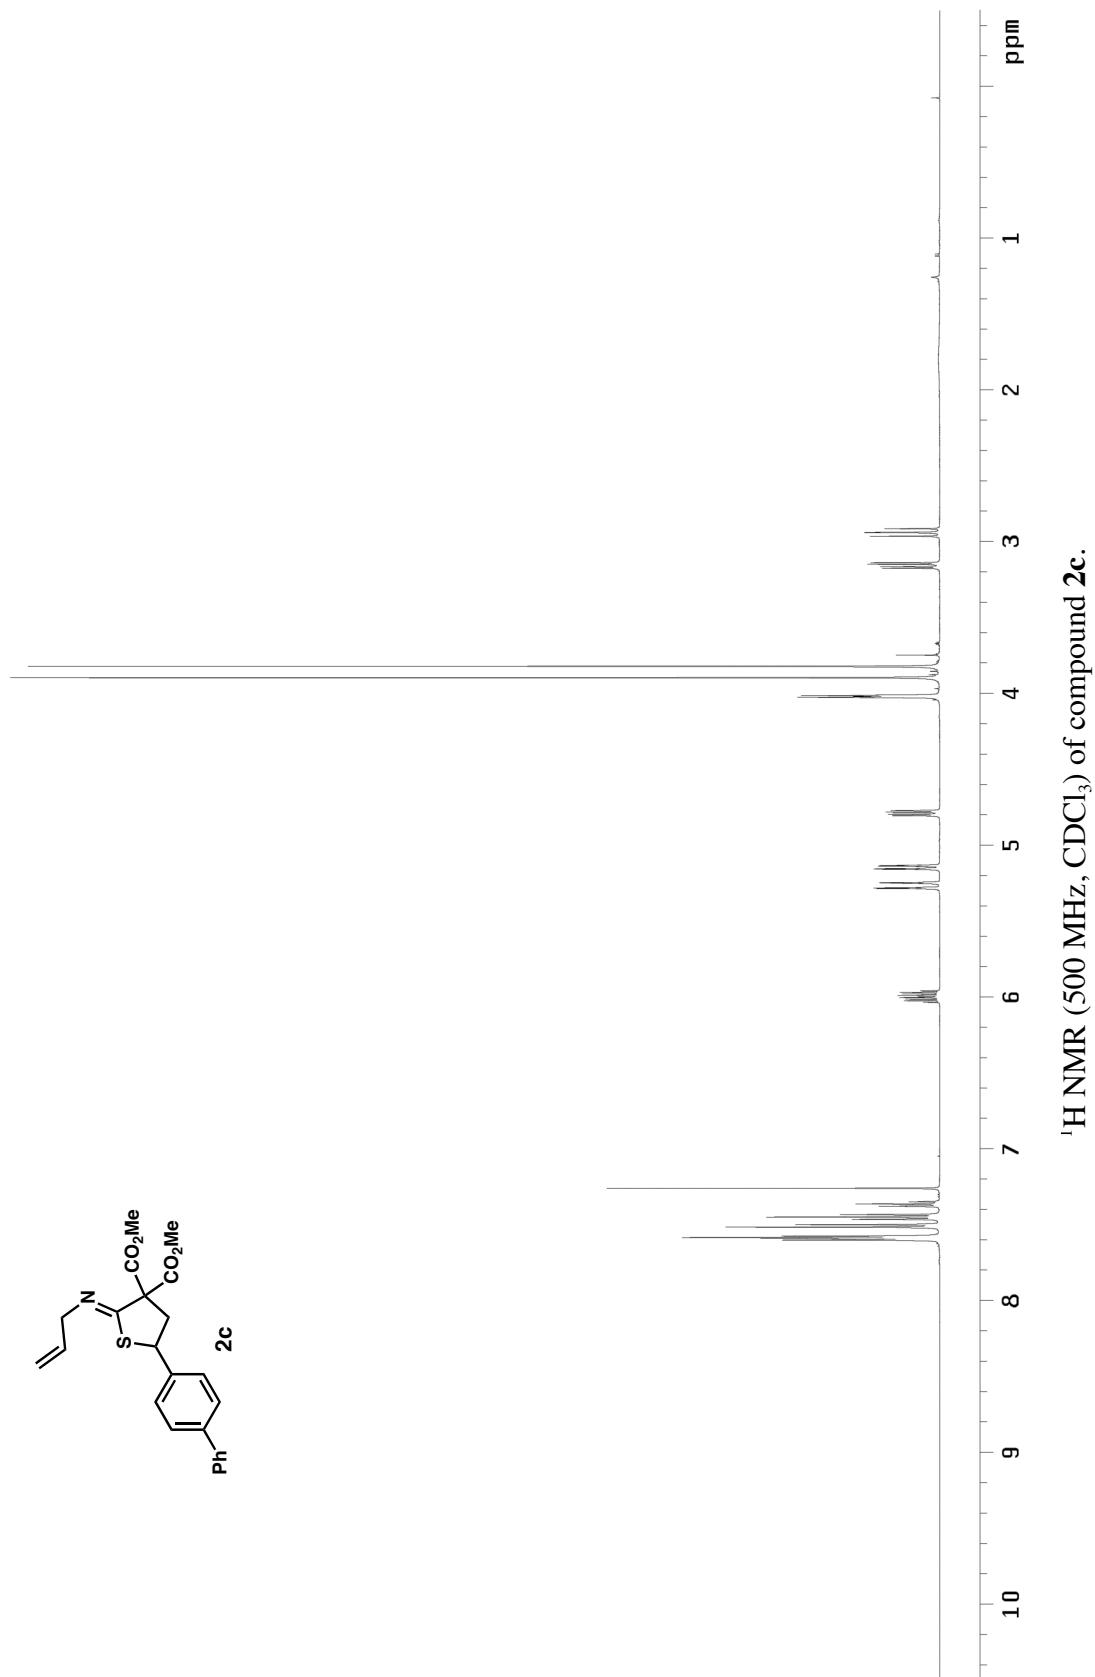

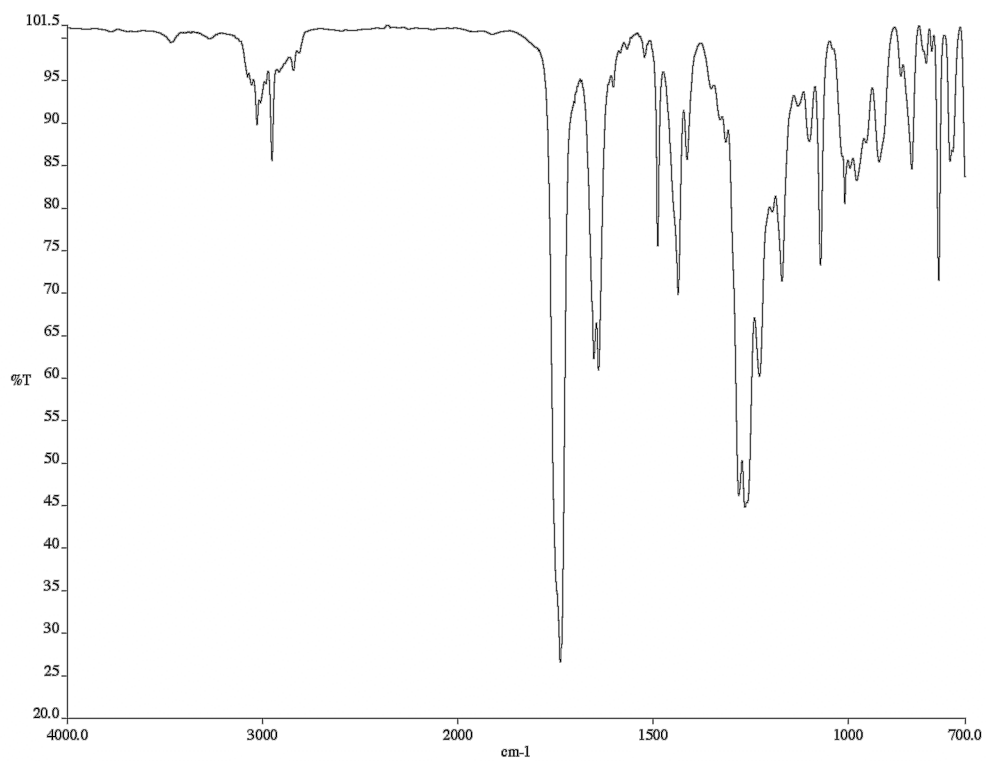Infrared spectrum (thin film/NaCl) of compound **2c**.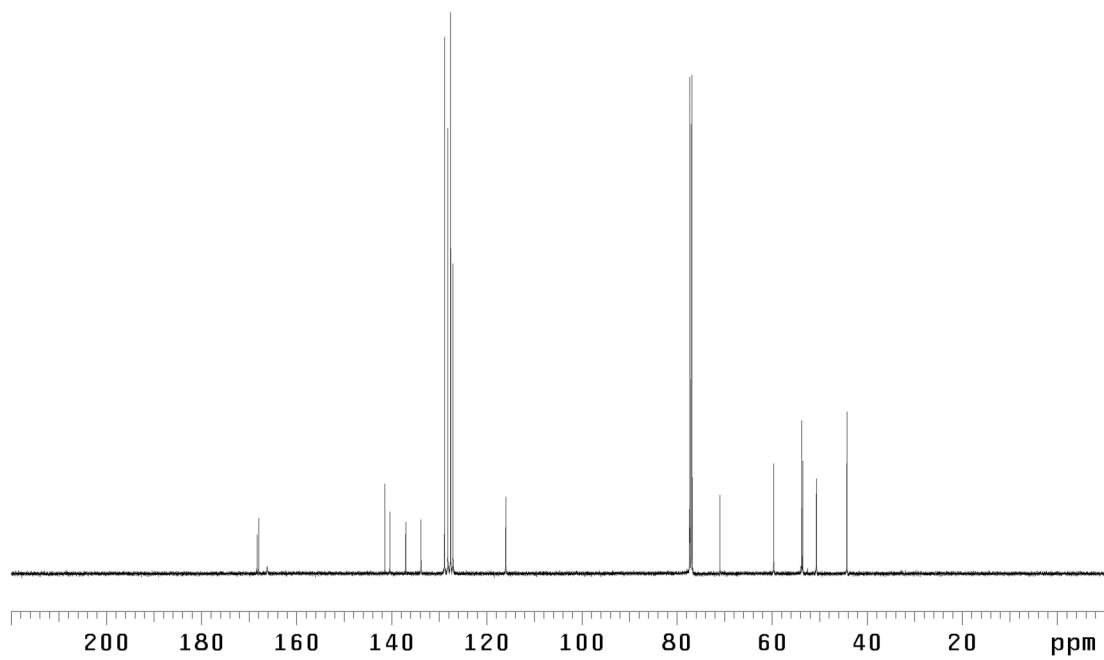<sup>13</sup>C NMR (126 MHz, CDCl<sub>3</sub>) of compound **2c**.

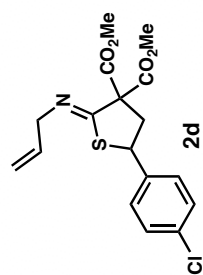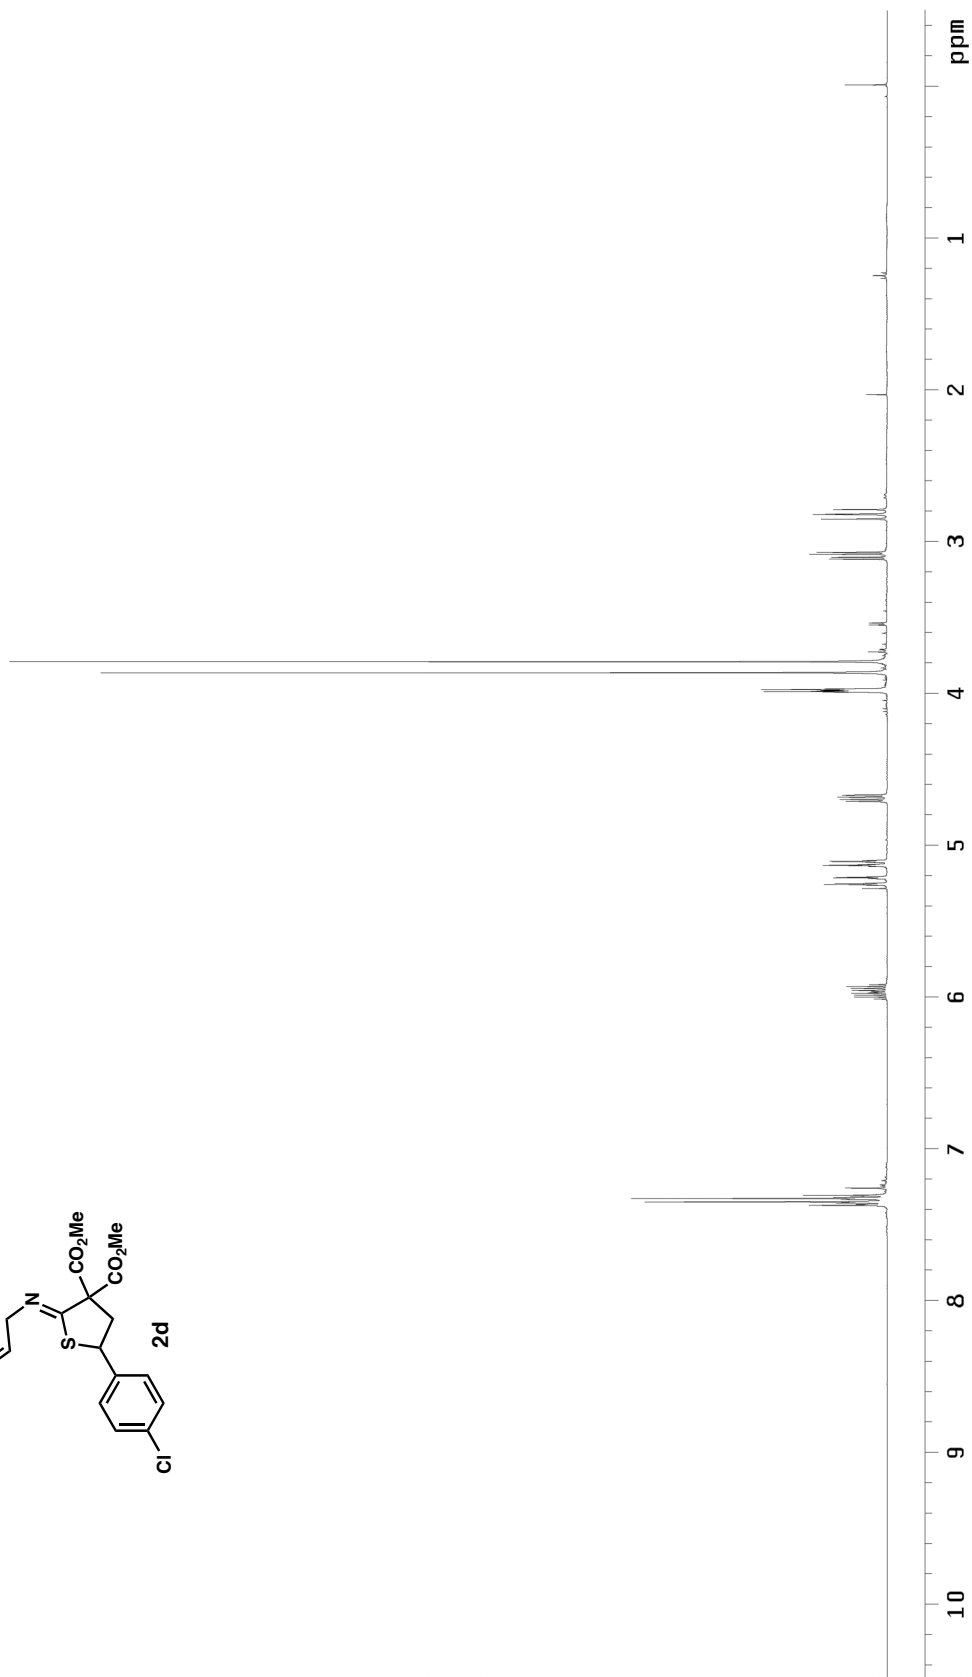

<sup>1</sup>H NMR (500 MHz, CDCl<sub>3</sub>) of compound **2d**.

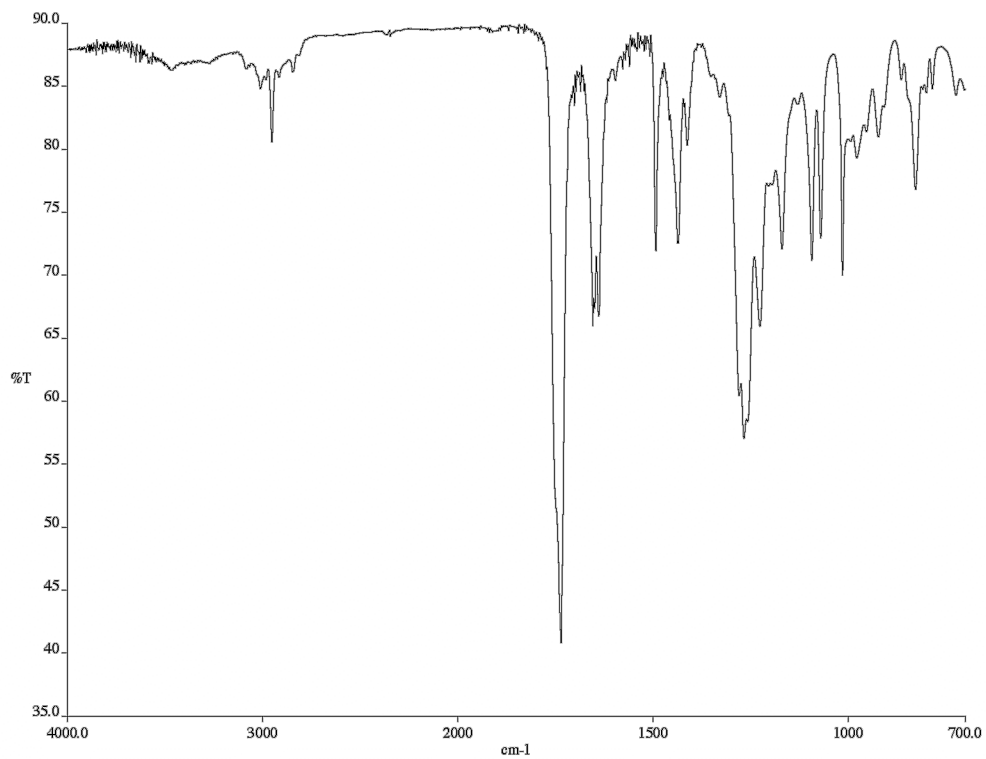Infrared spectrum (thin film/NaCl) of compound **2d**.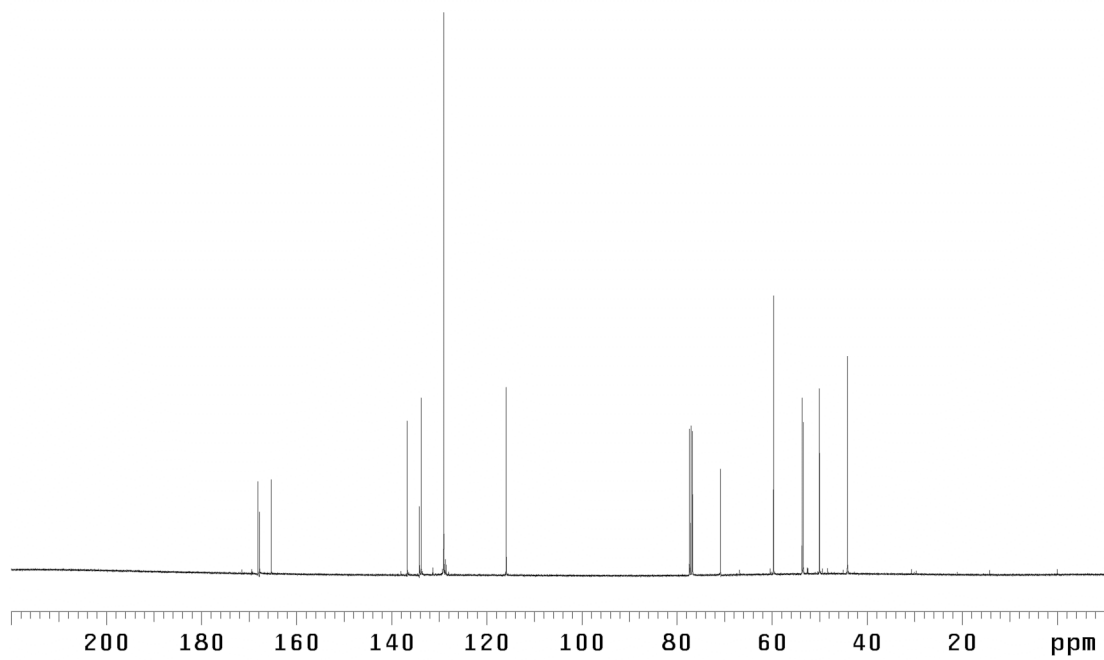 $^{13}\text{C}$  NMR (126 MHz,  $\text{CDCl}_3$ ) of compound **2d**.

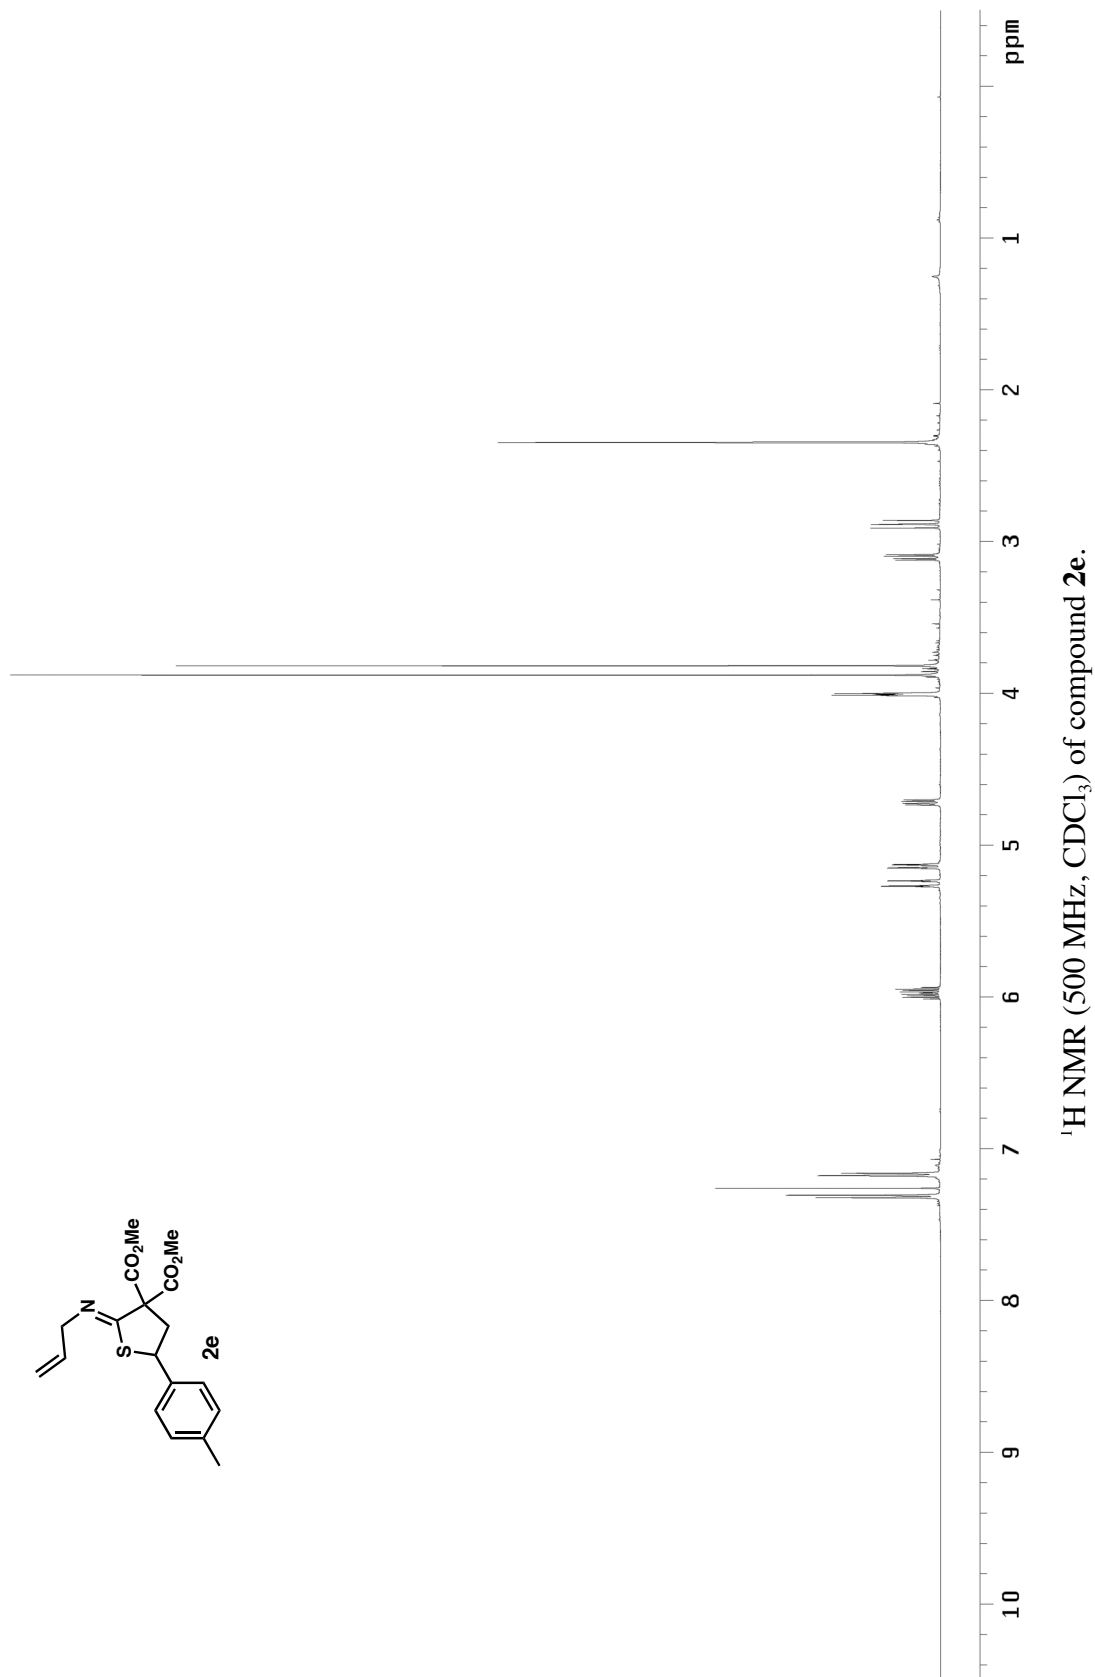

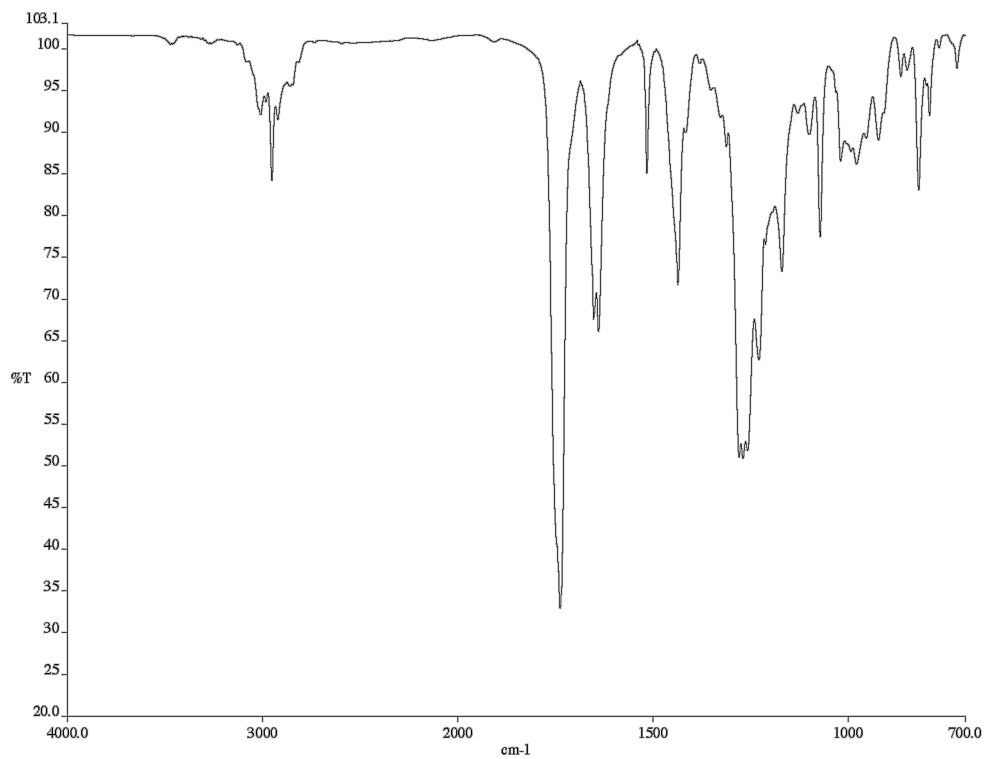Infrared spectrum (thin film/NaCl) of compound **2e**.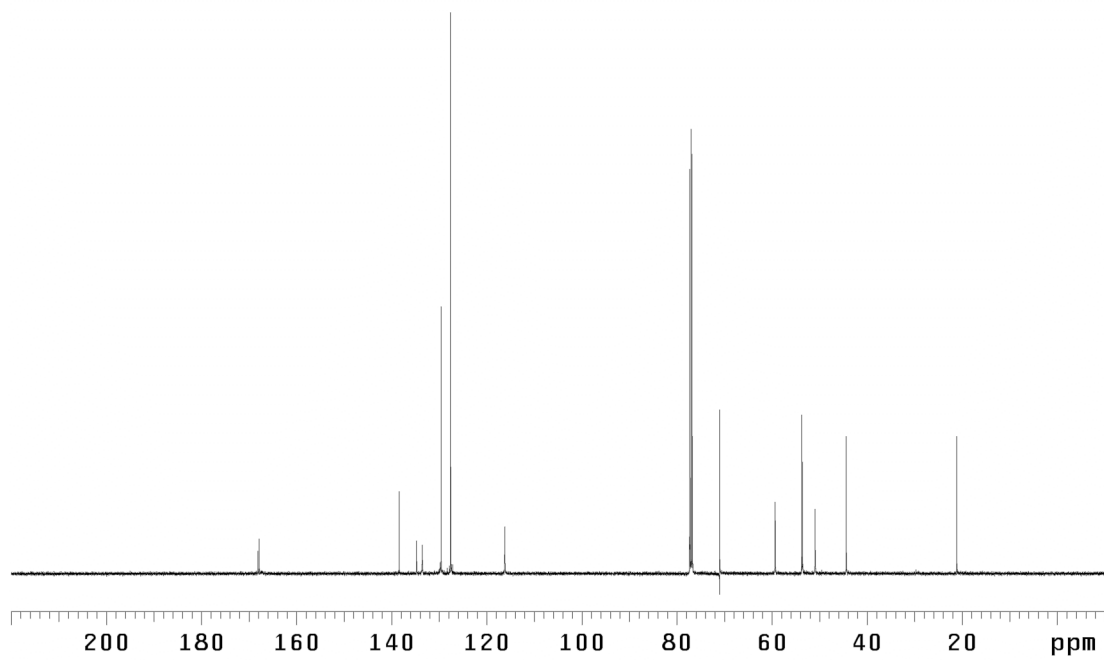 $^{13}\text{C}$  NMR (126 MHz,  $\text{CDCl}_3$ ) of compound **2e**.

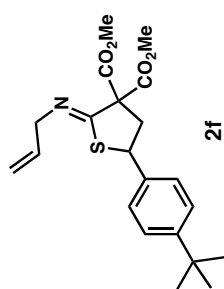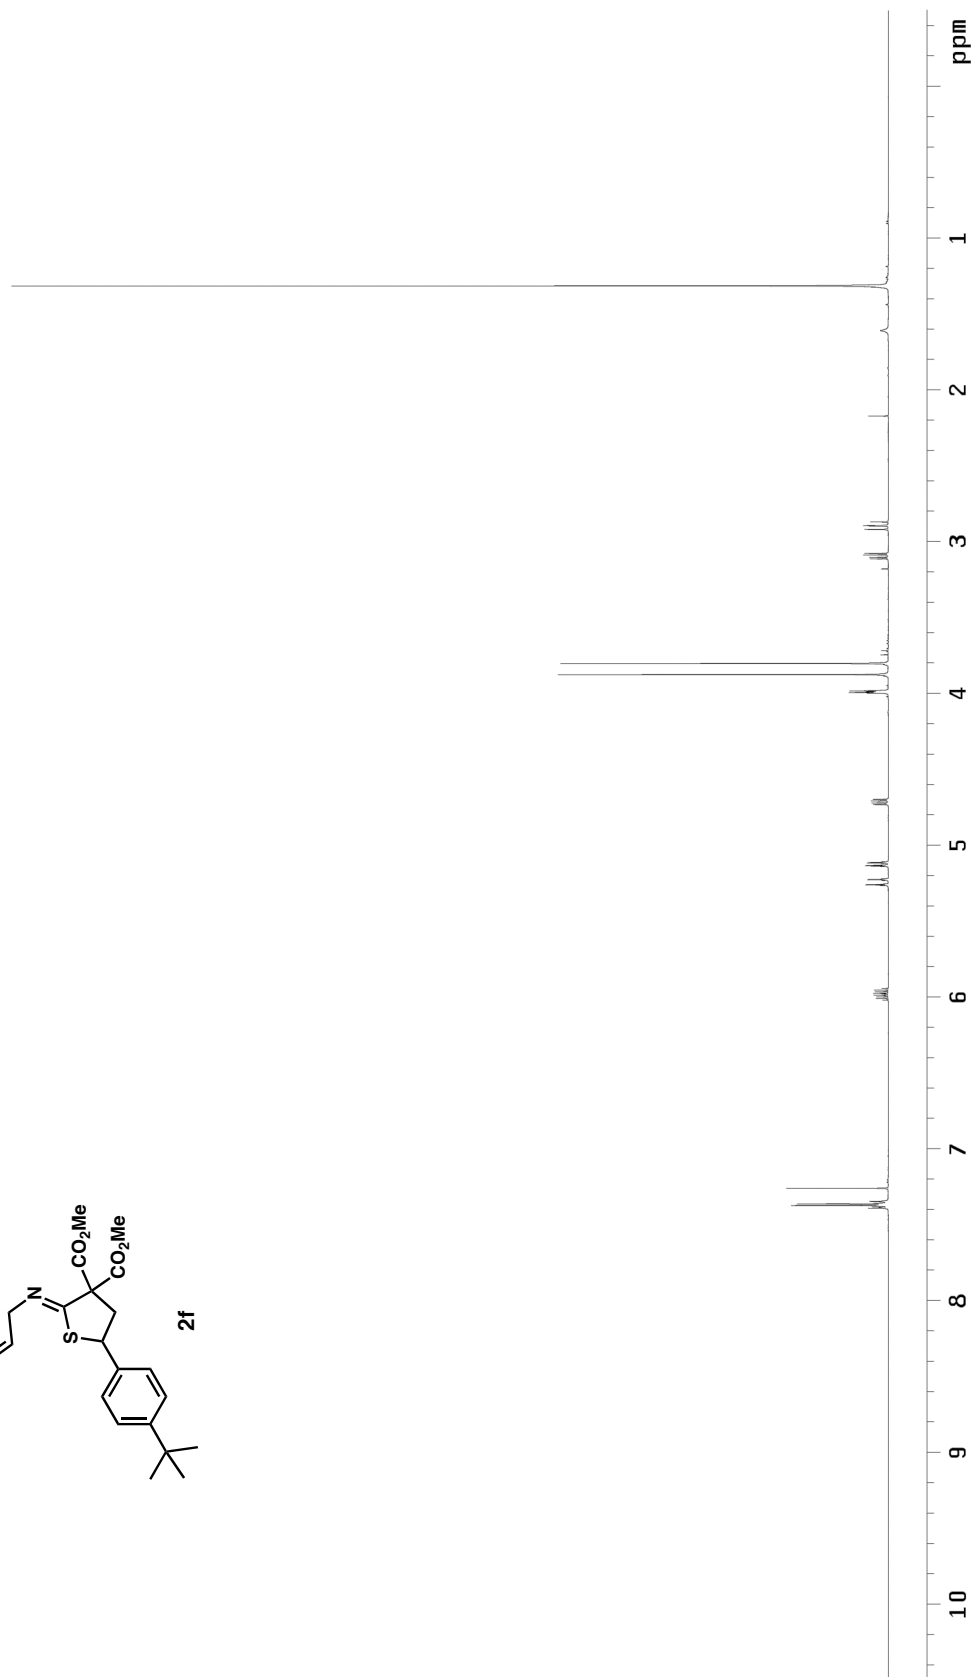

<sup>1</sup>H NMR (500 MHz, CDCl<sub>3</sub>) of compound **2f**.



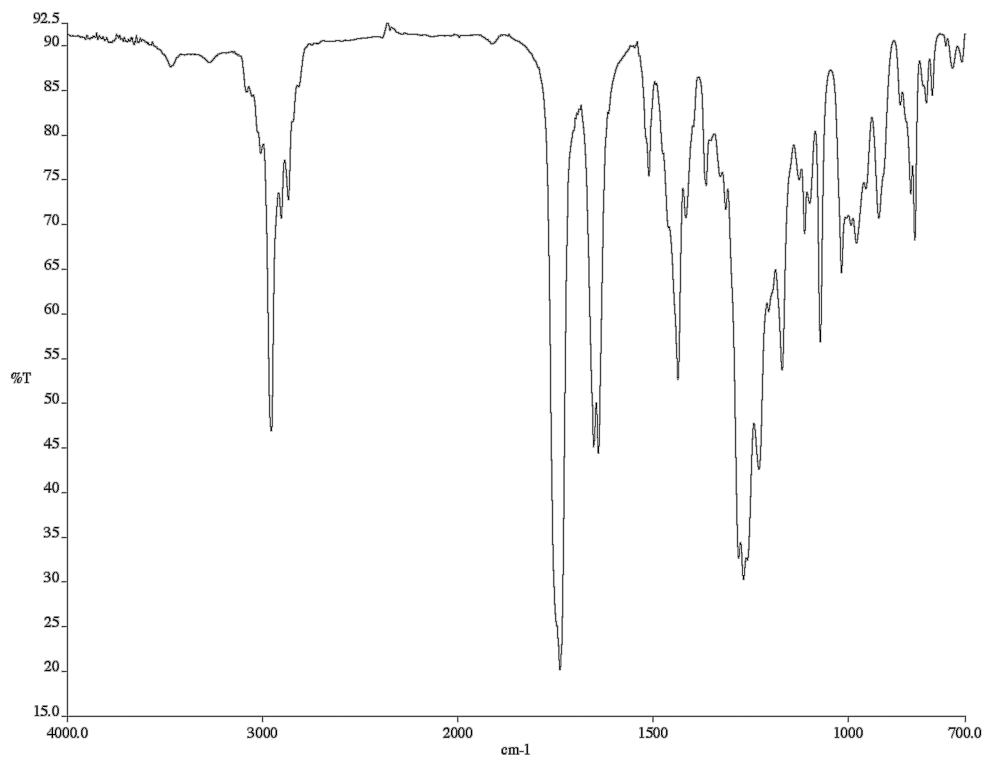Infrared spectrum (thin film/NaCl) of compound **2f**.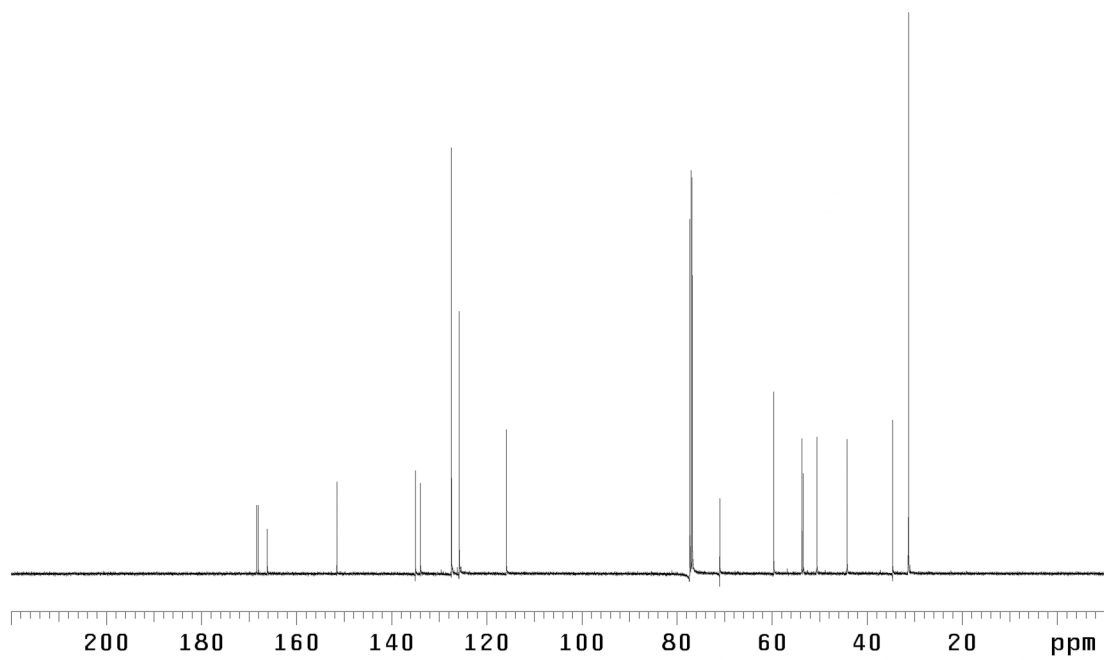<sup>13</sup>C NMR (126 MHz, CDCl<sub>3</sub>) of compound **2f**.

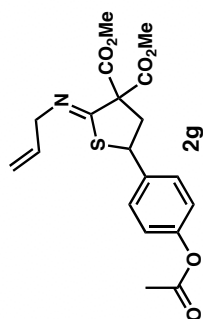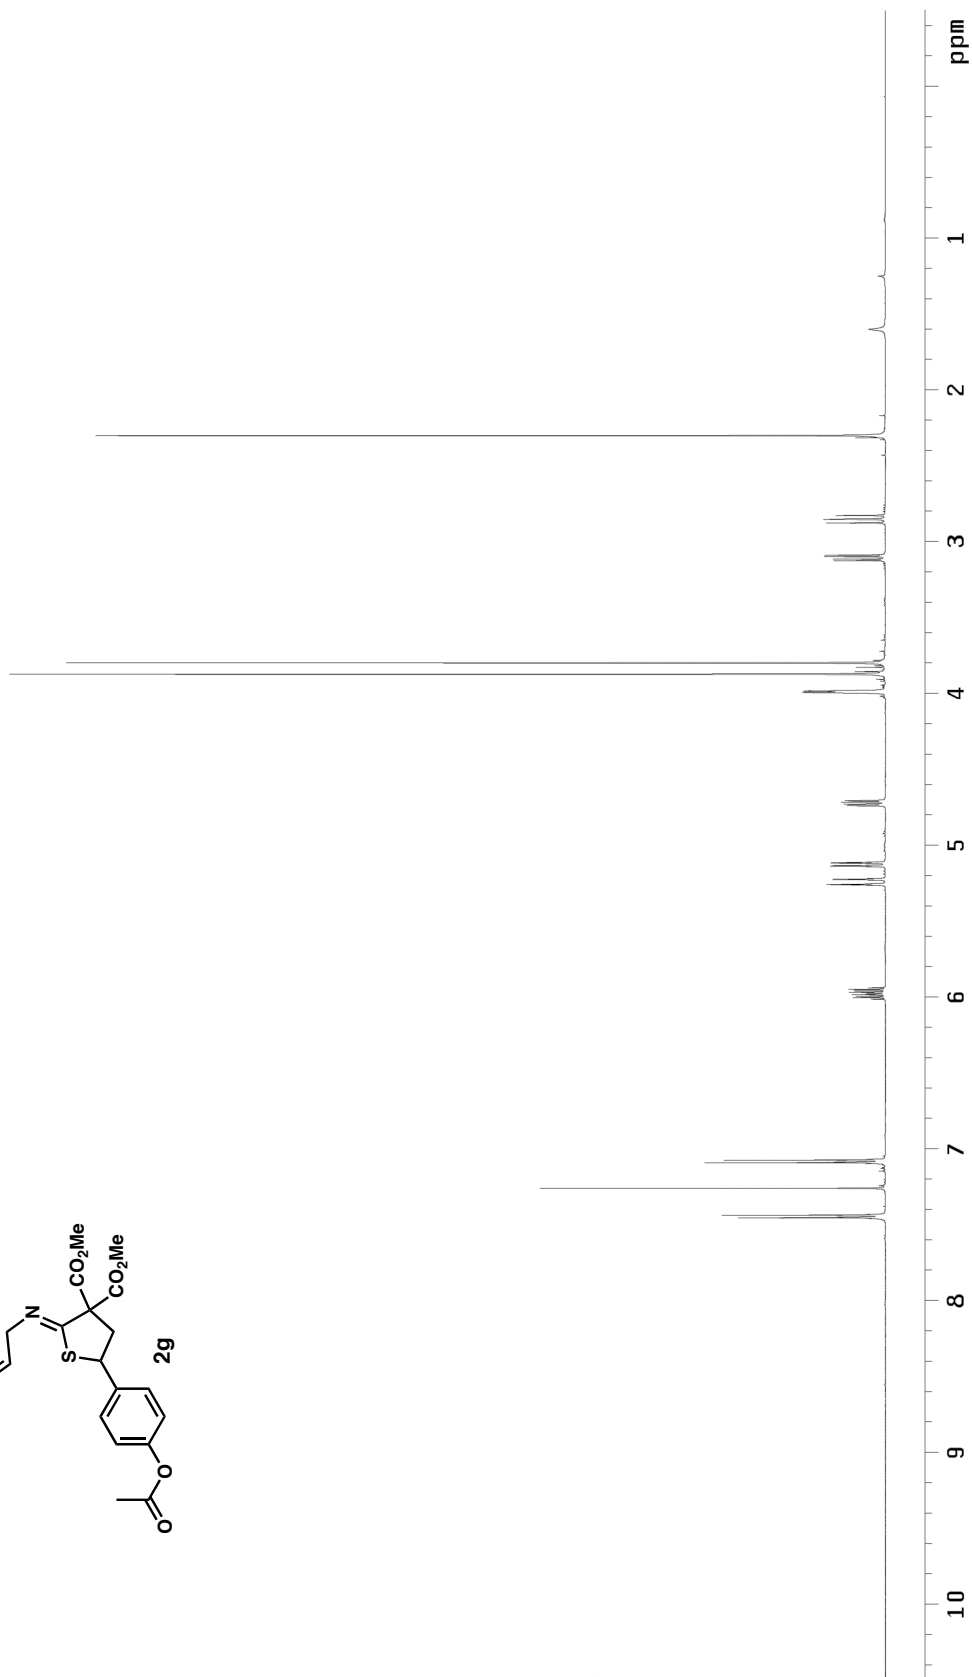

$^1\text{H}$  NMR (500 MHz,  $\text{CDCl}_3$ ) of compound **2g**.

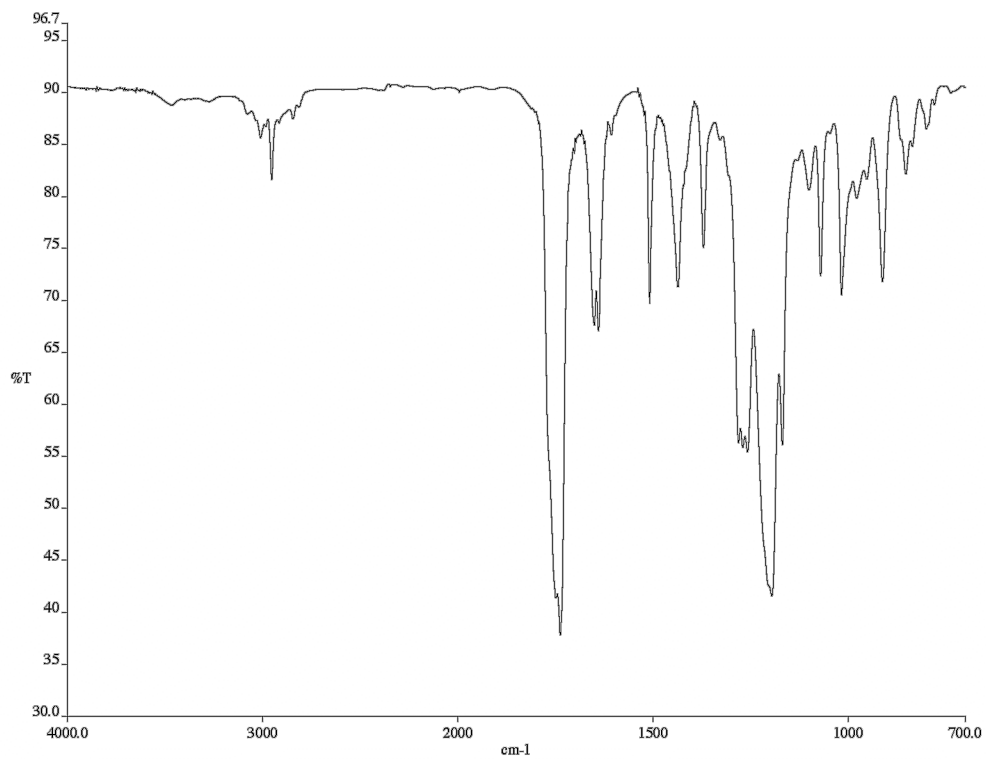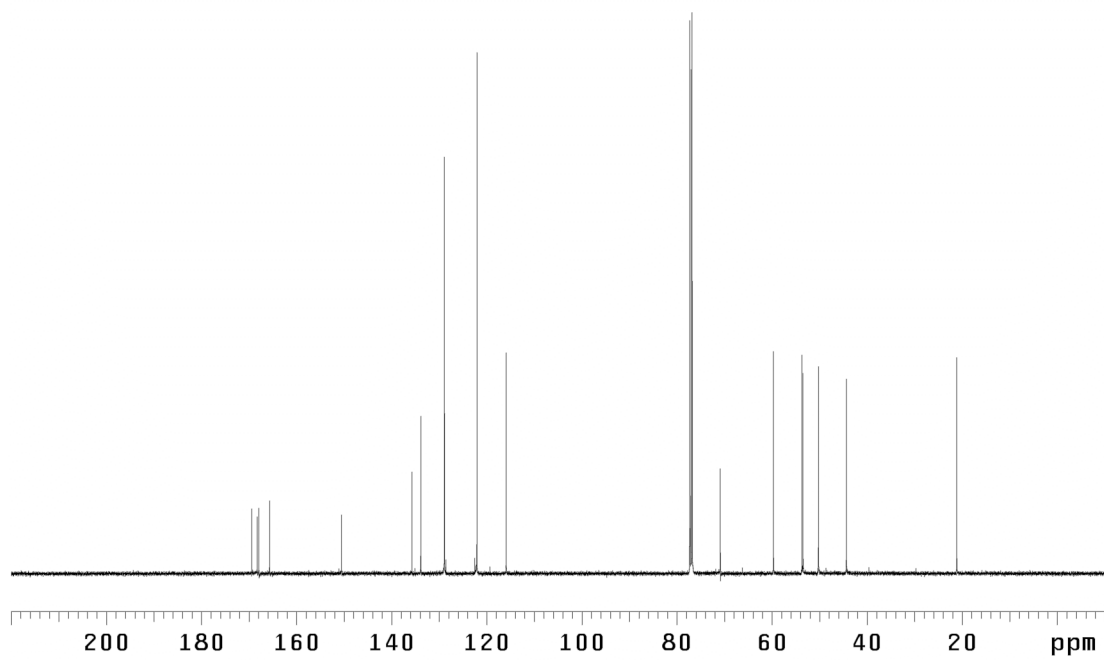

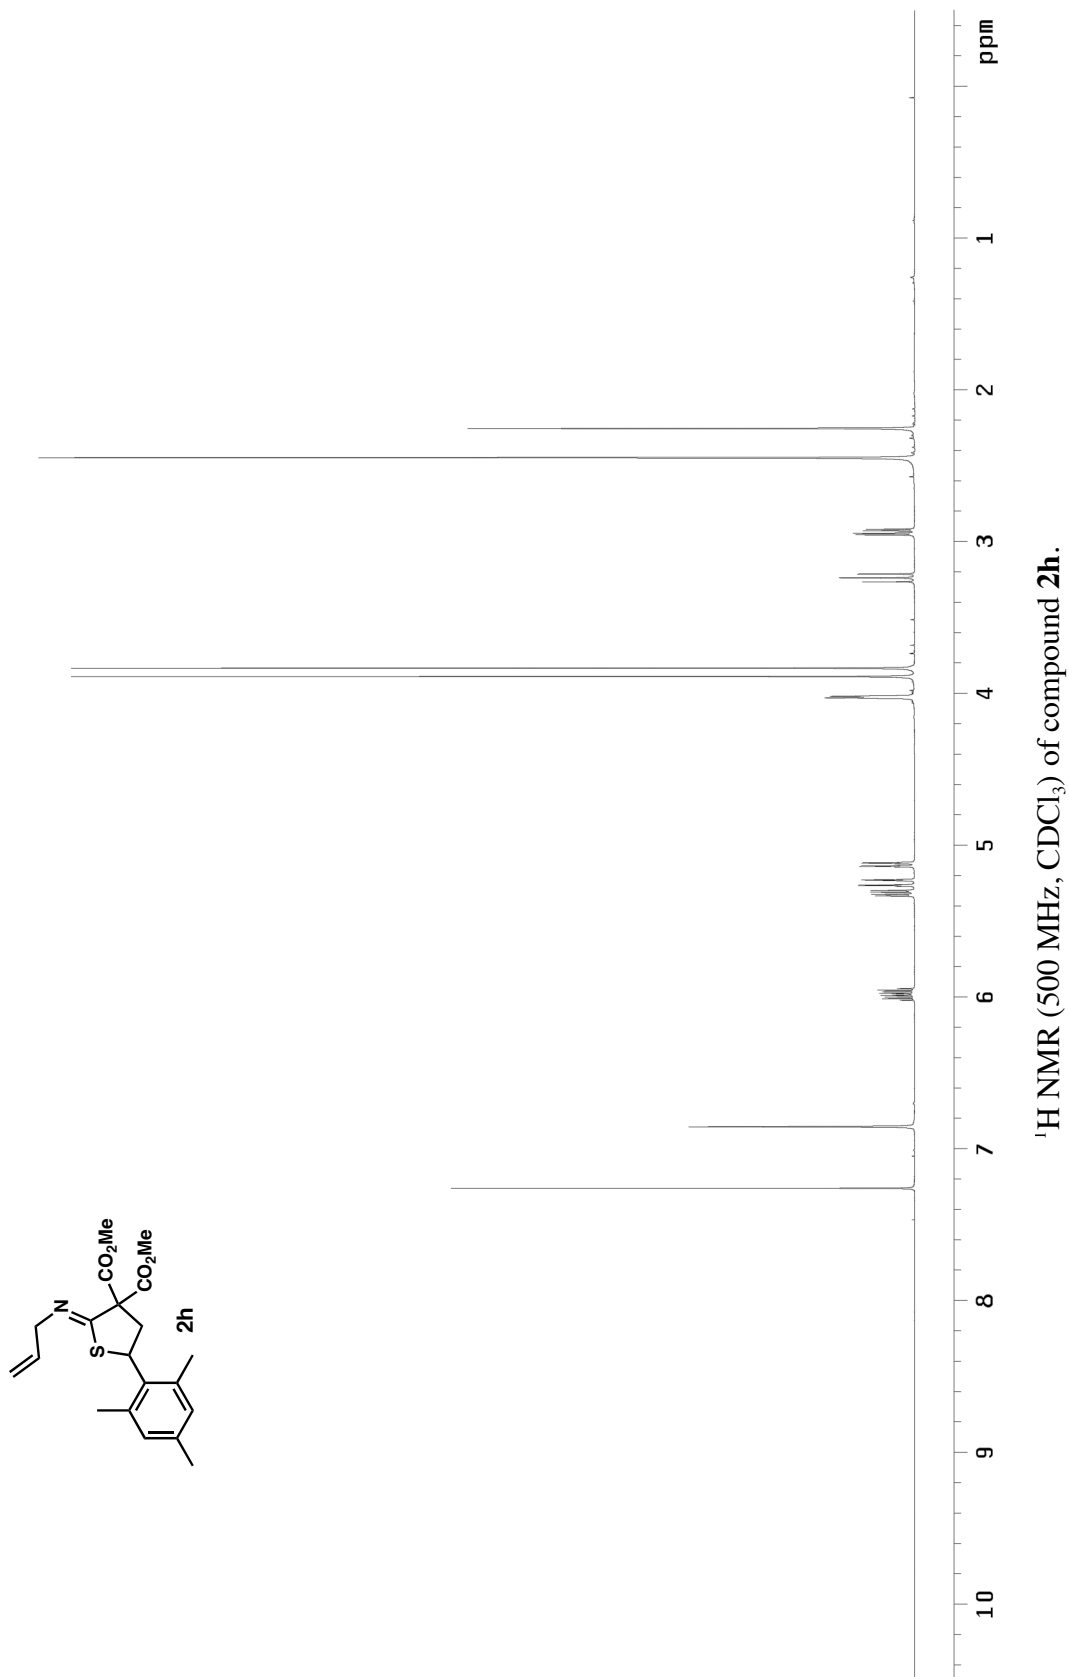

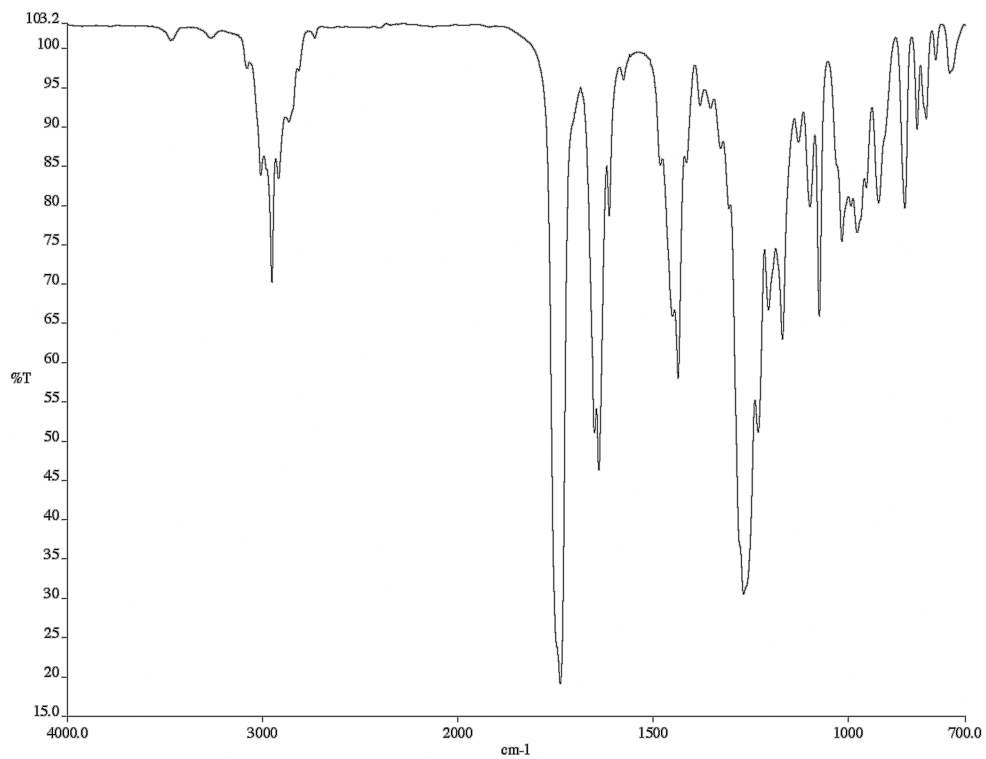Infrared spectrum (thin film/NaCl) of compound **2h**.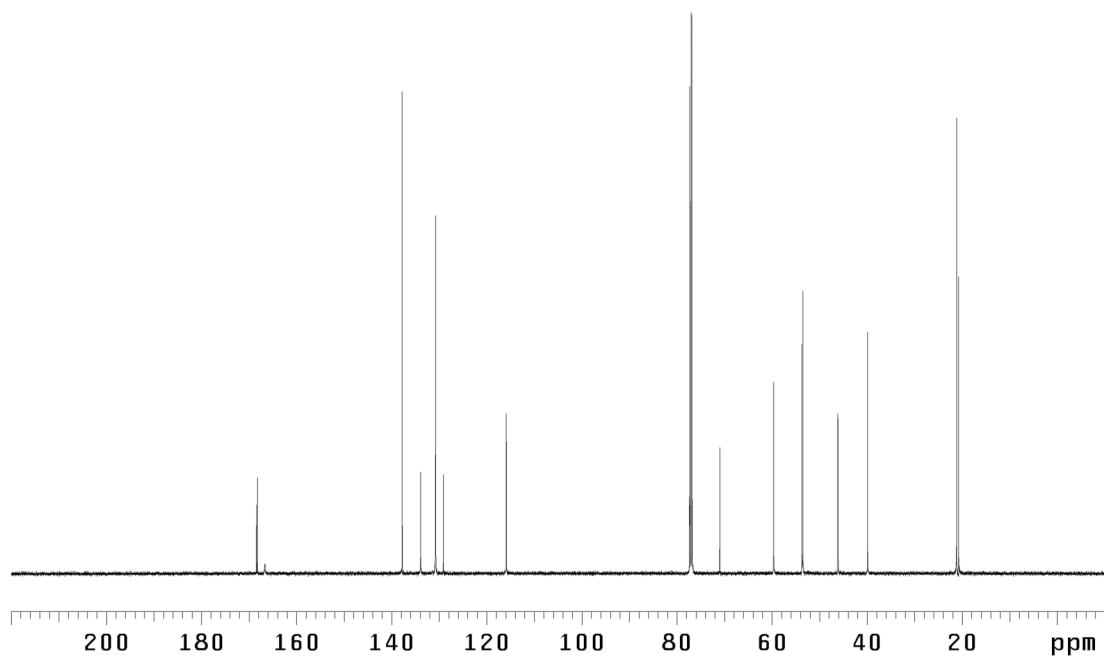 $^{13}\text{C}$  NMR (500 MHz,  $\text{CDCl}_3$ ) of compound **2h**.

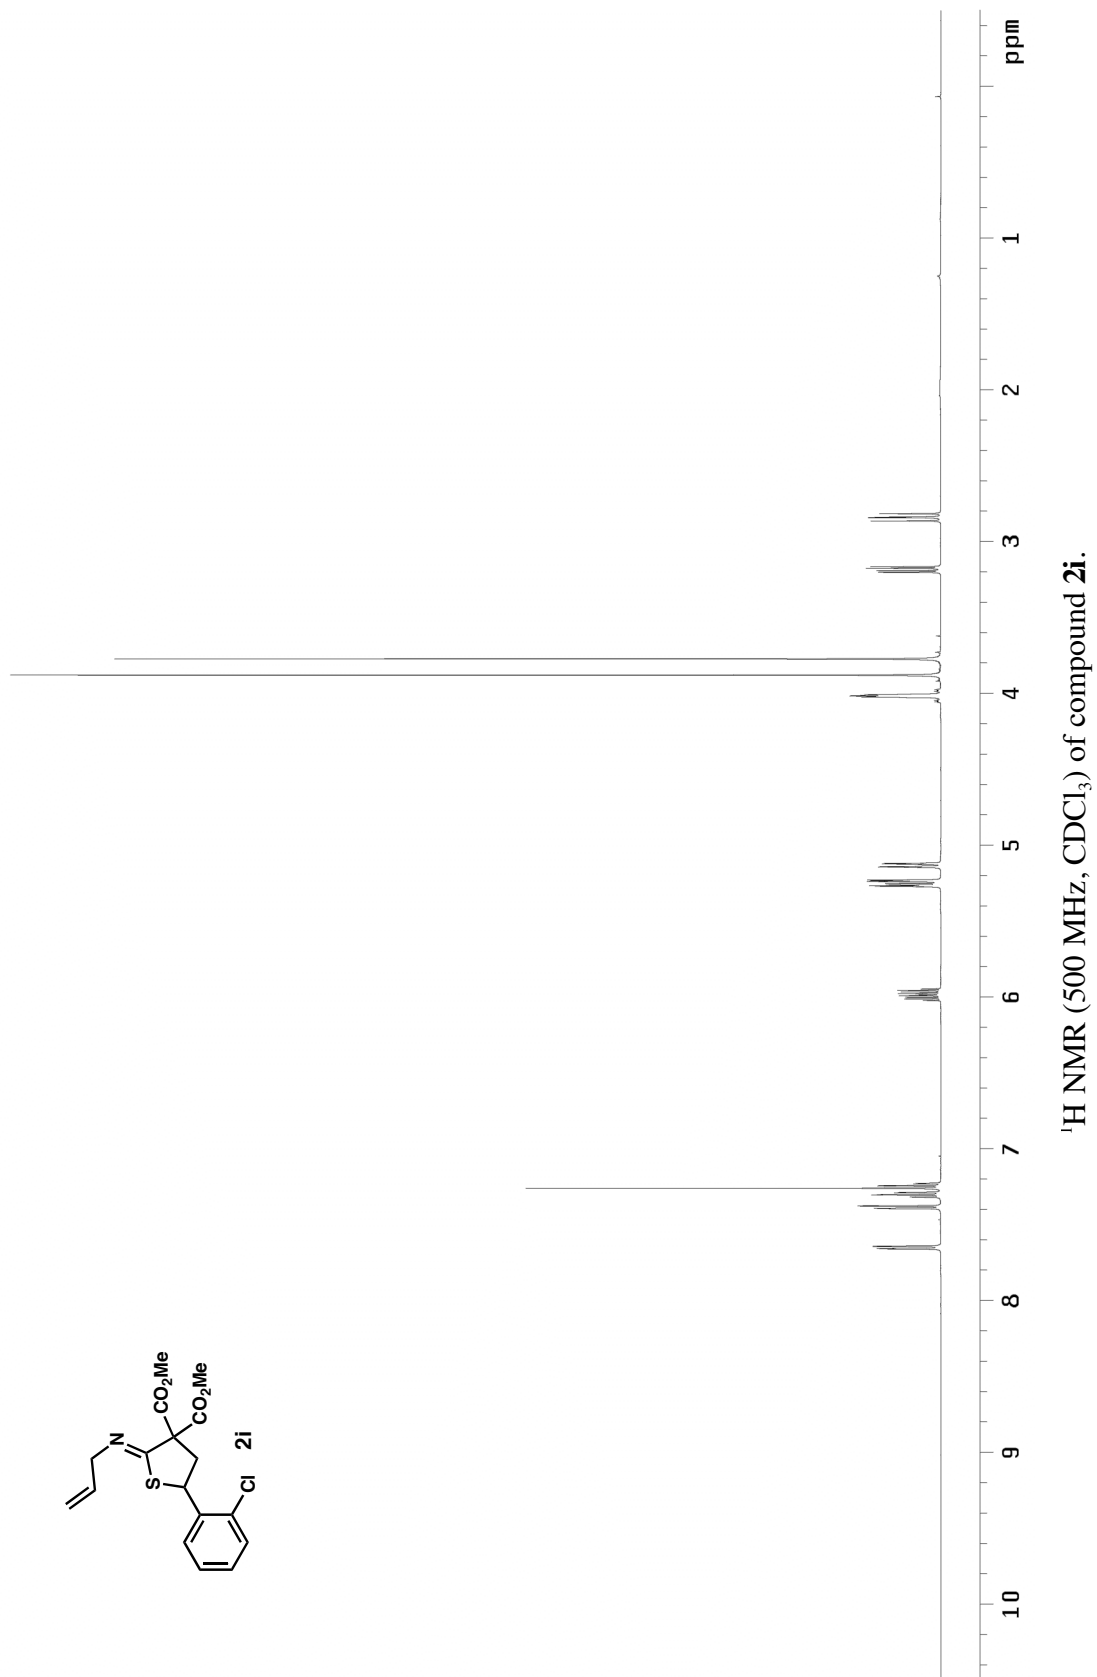

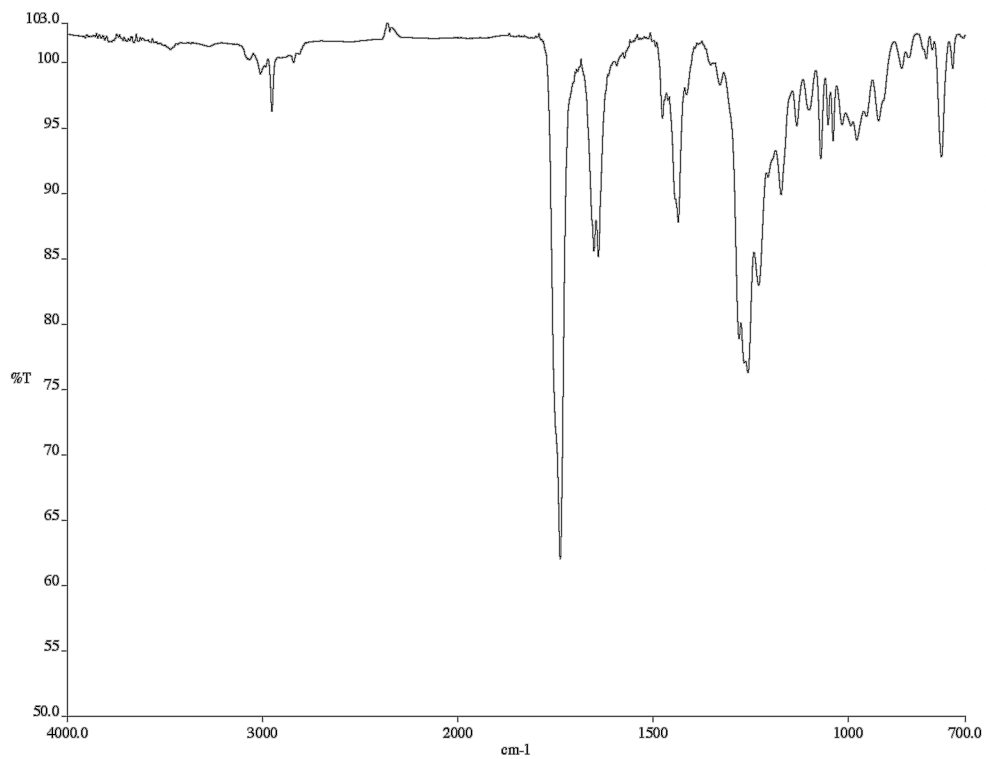Infrared spectrum (thin film/NaCl) of compound **2i**.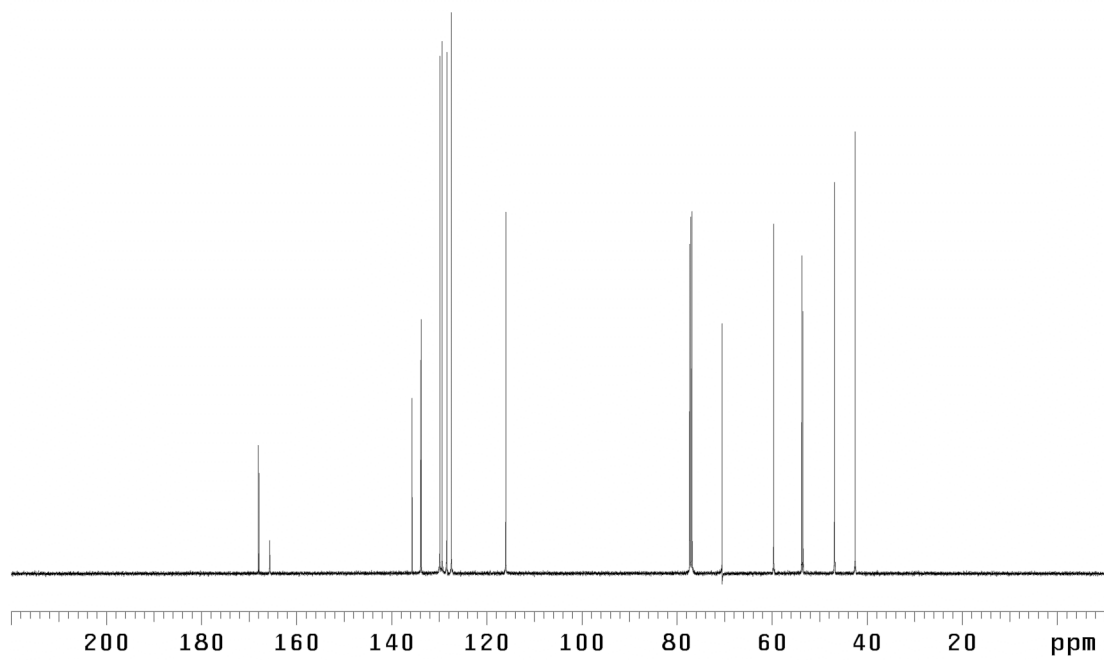<sup>13</sup>C NMR (126 MHz, CDCl<sub>3</sub>) of compound **2i**.

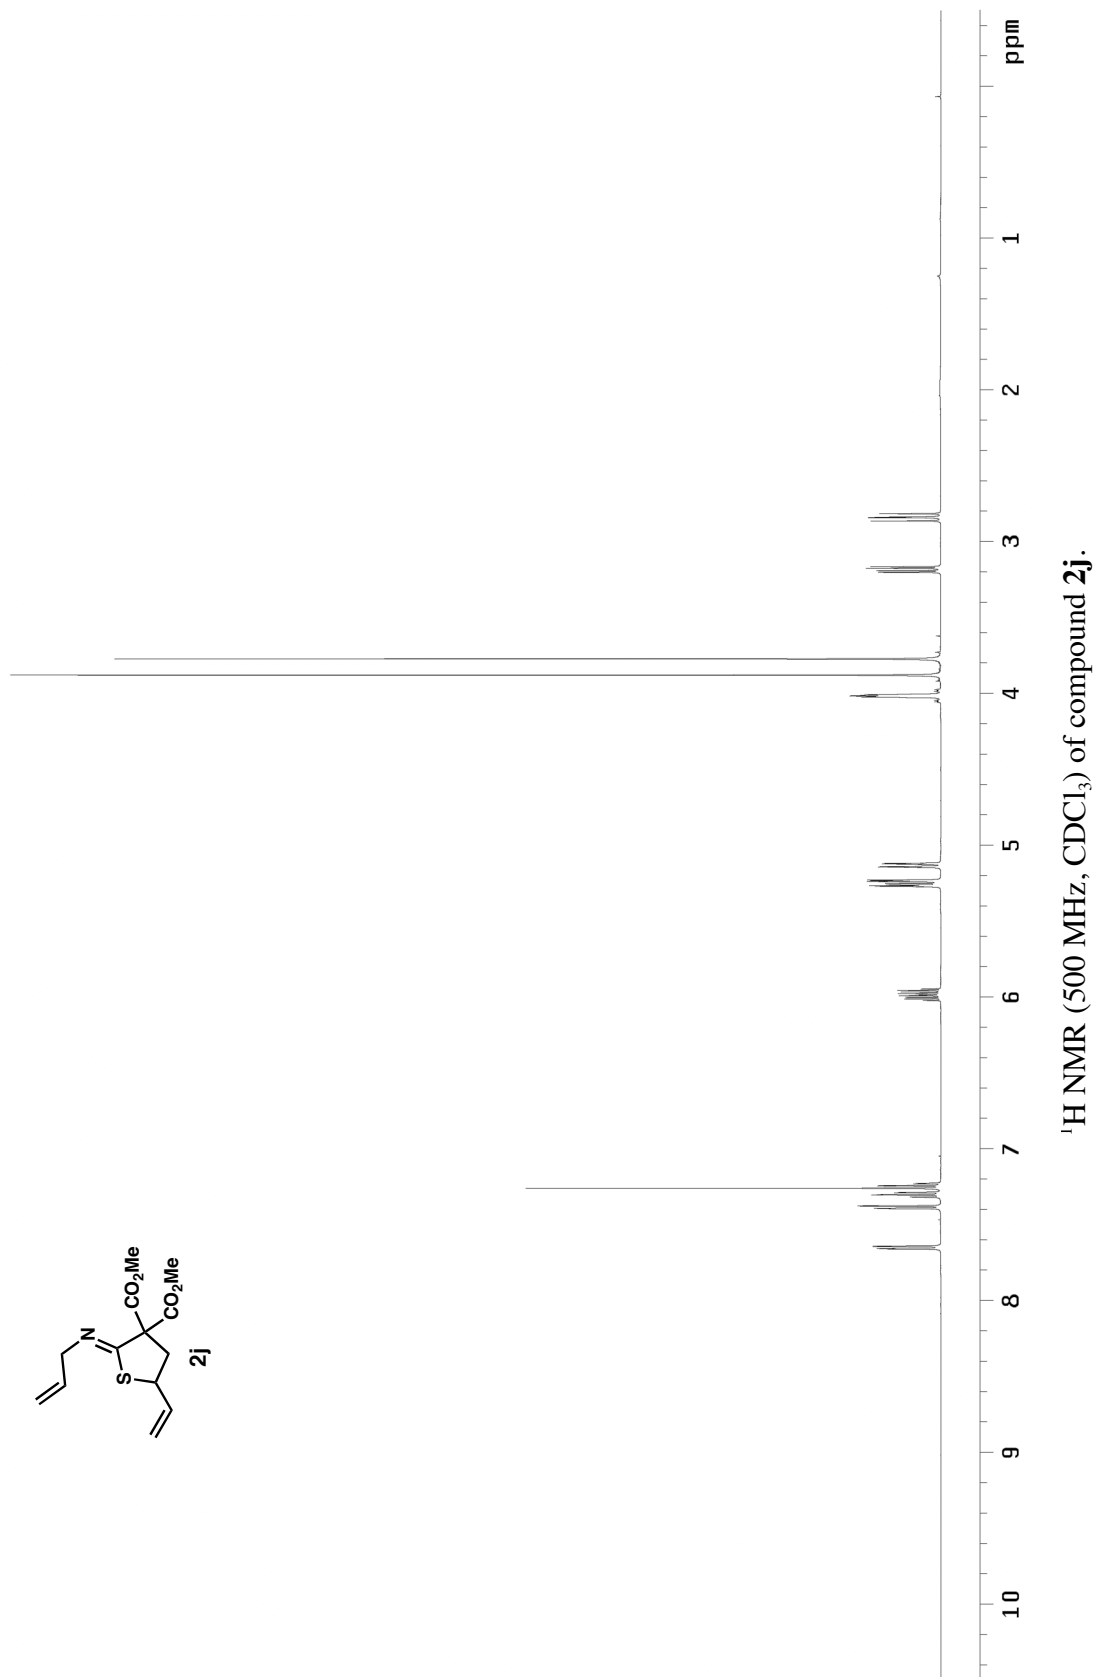



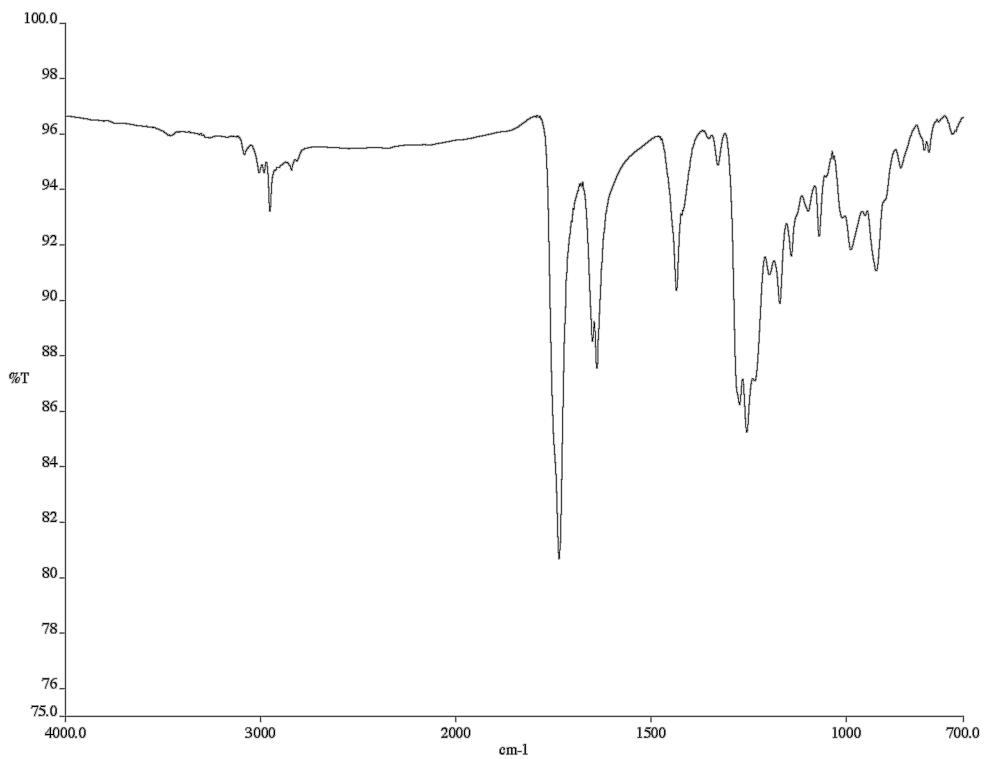Infrared spectrum (thin film/NaCl) of compound **2j**.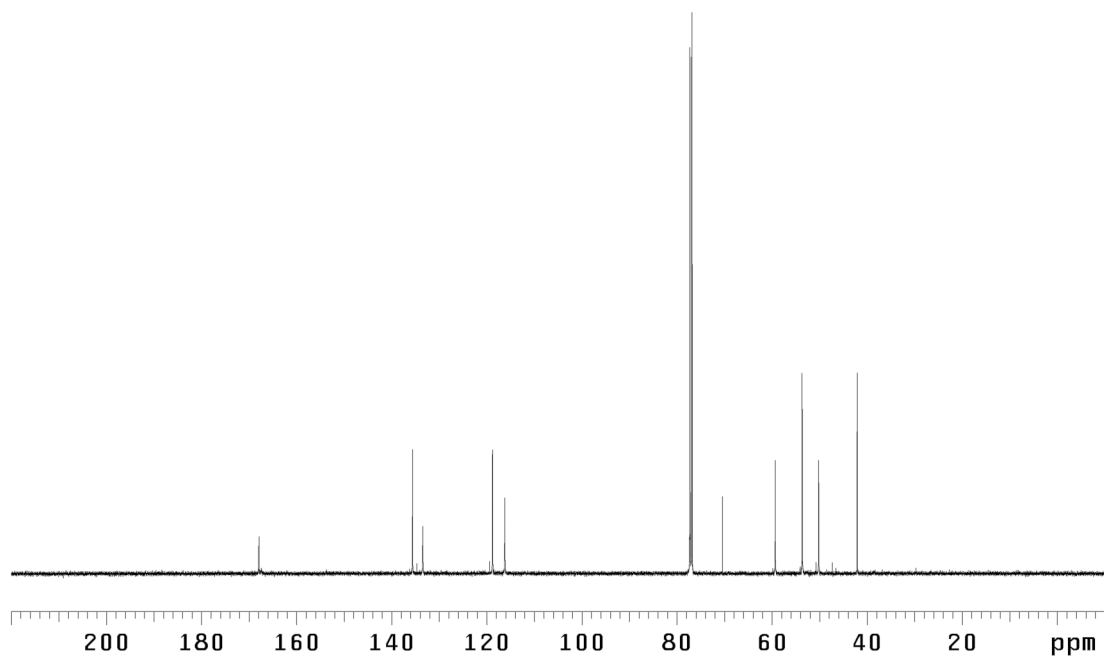<sup>13</sup>C NMR (126 MHz, CDCl<sub>3</sub>) of compound **2j**.

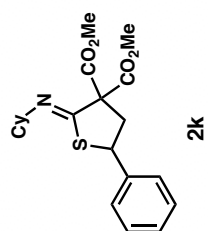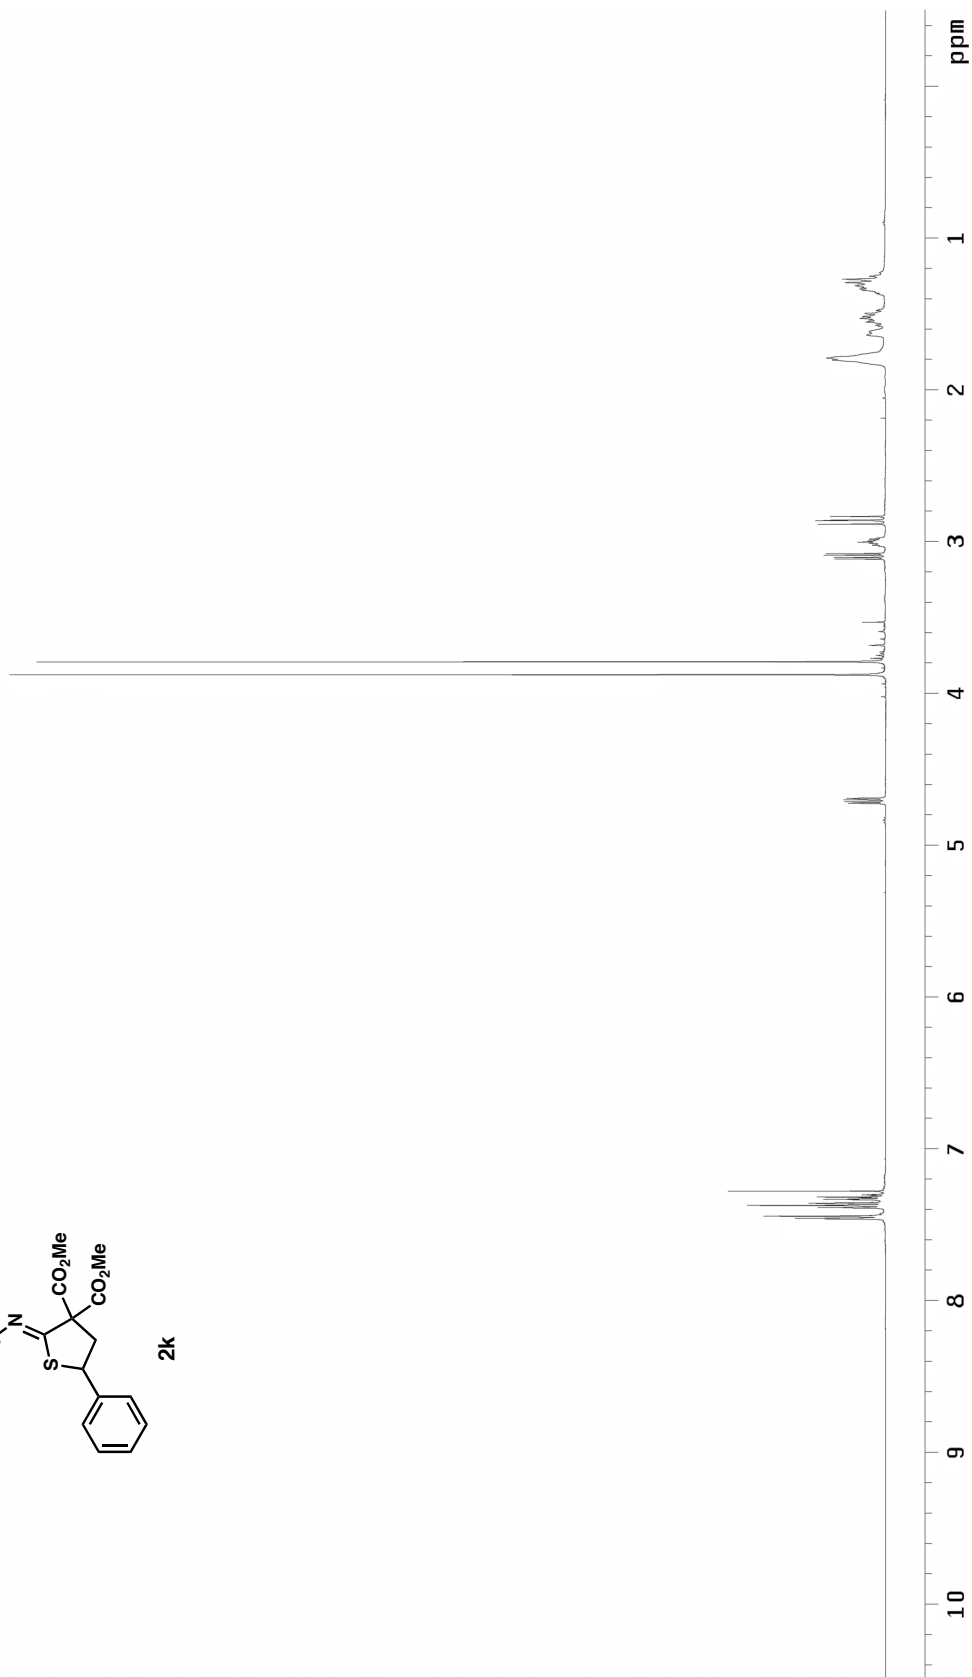

<sup>1</sup>H NMR (500 MHz, CDCl<sub>3</sub>) of compound **2k**.

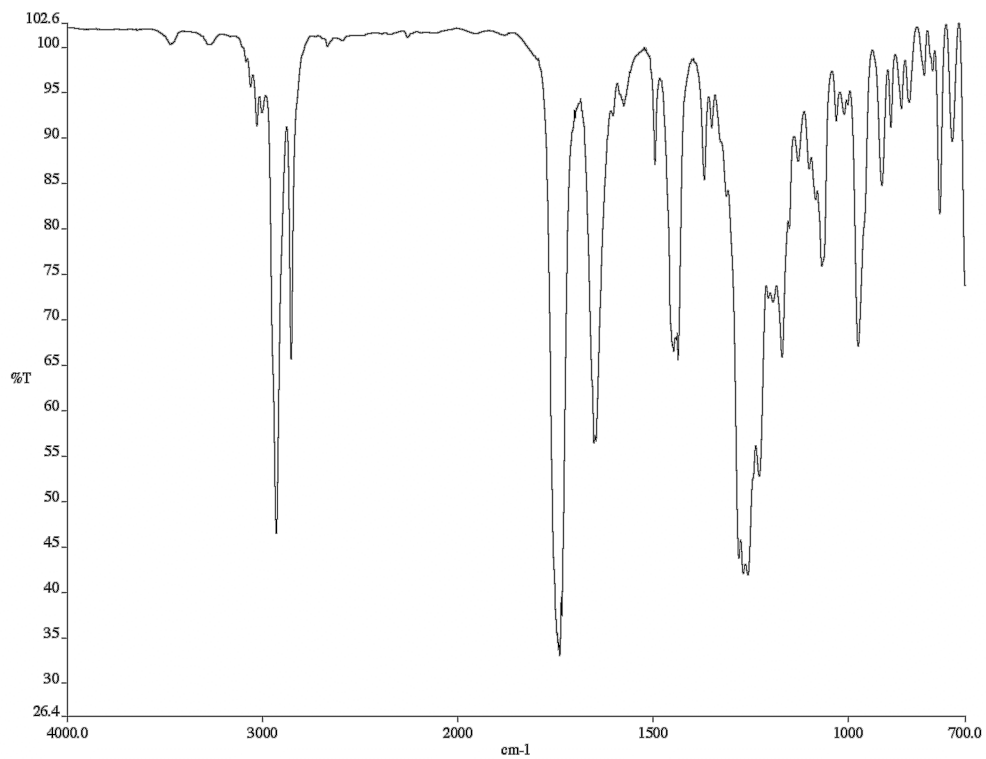Infrared spectrum (thin film/NaCl) of compound **2k**.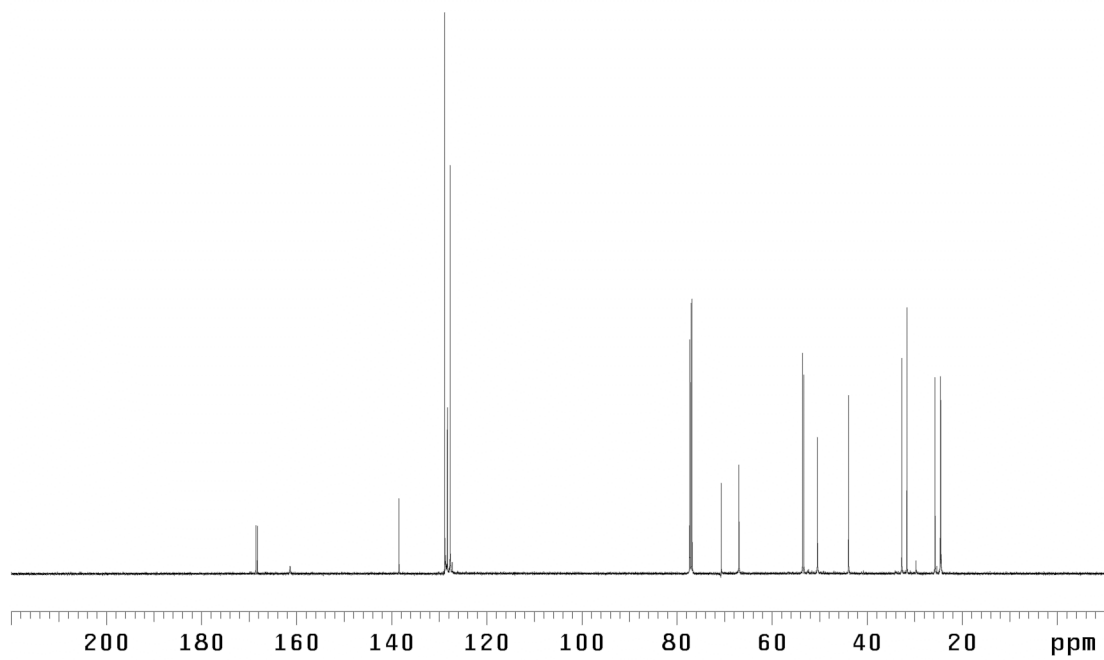<sup>13</sup>C NMR (500 MHz, CDCl<sub>3</sub>) of compound **2k**.

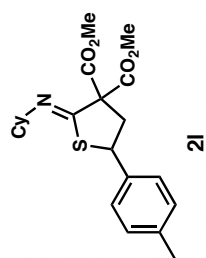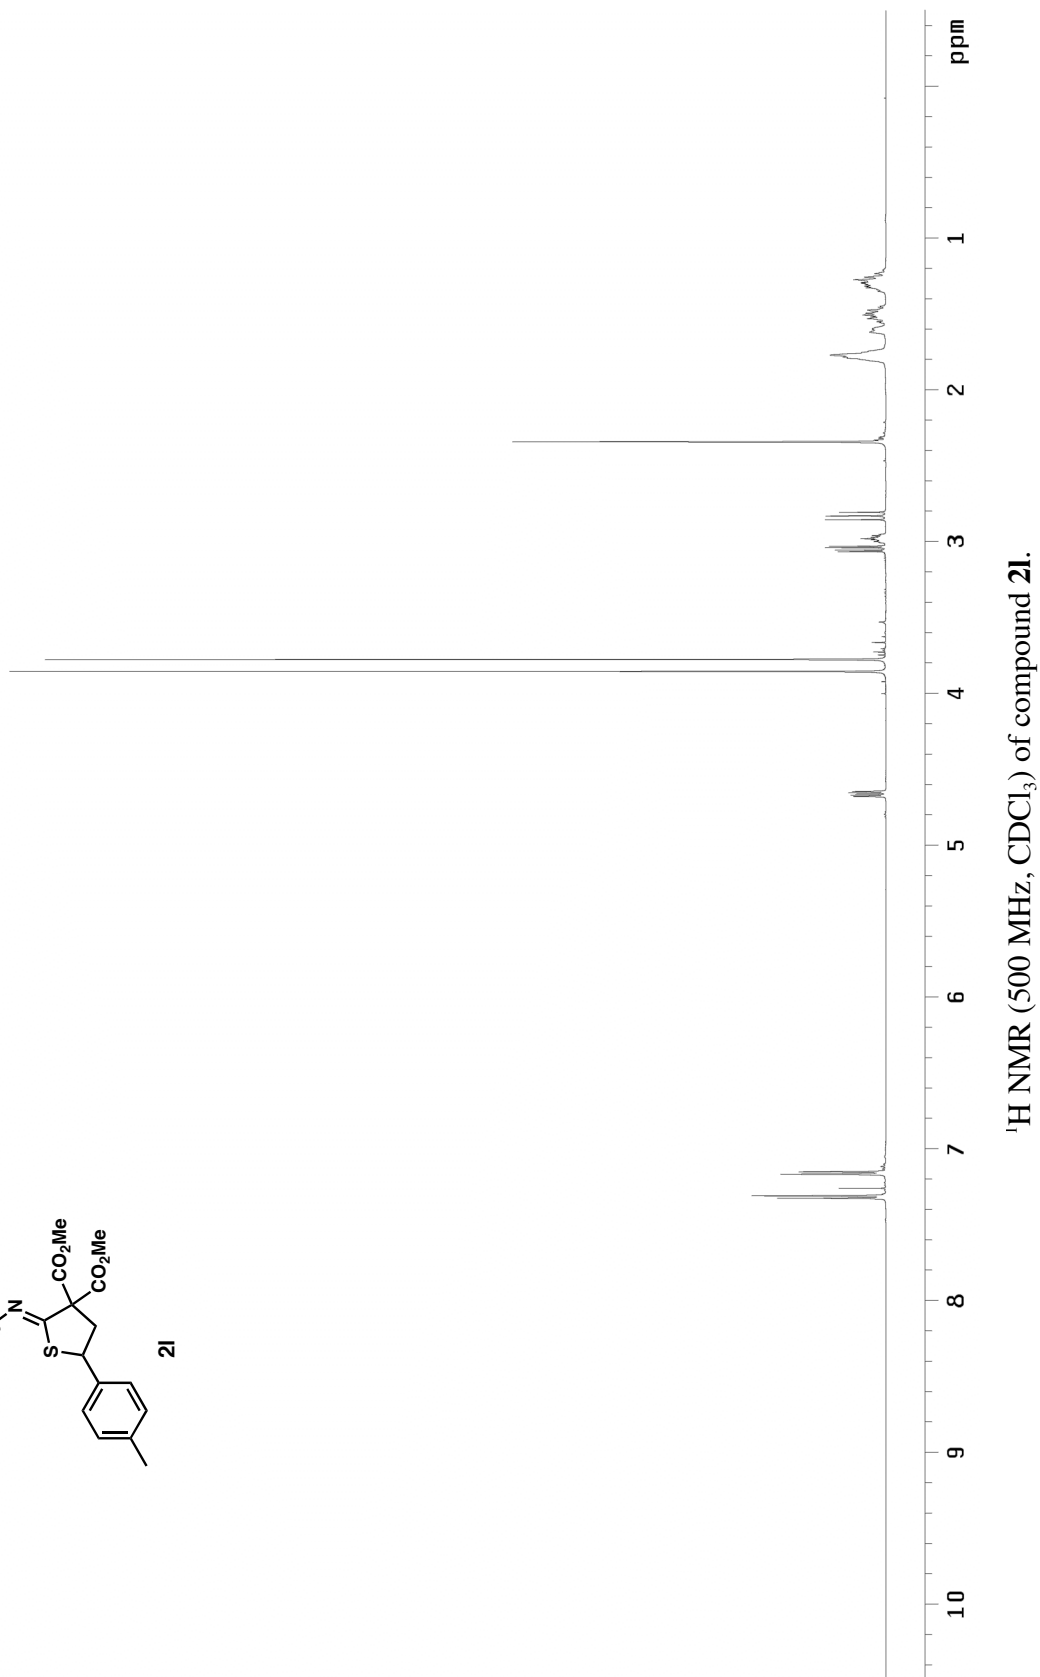

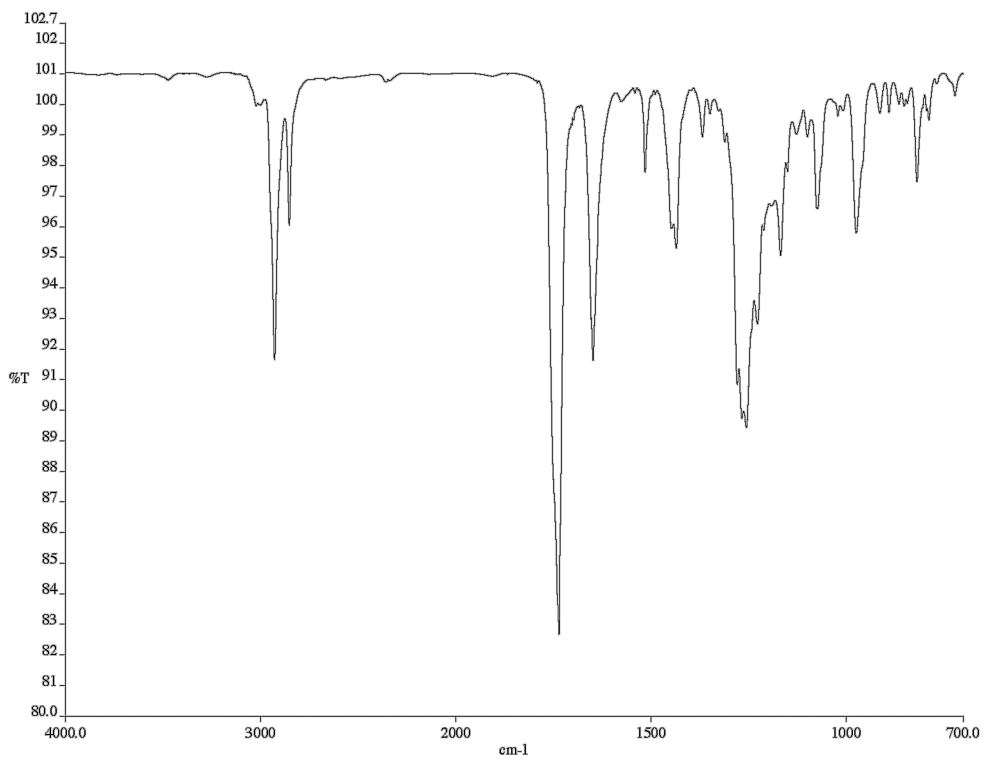Infrared spectrum (thin film/NaCl) of compound **21**.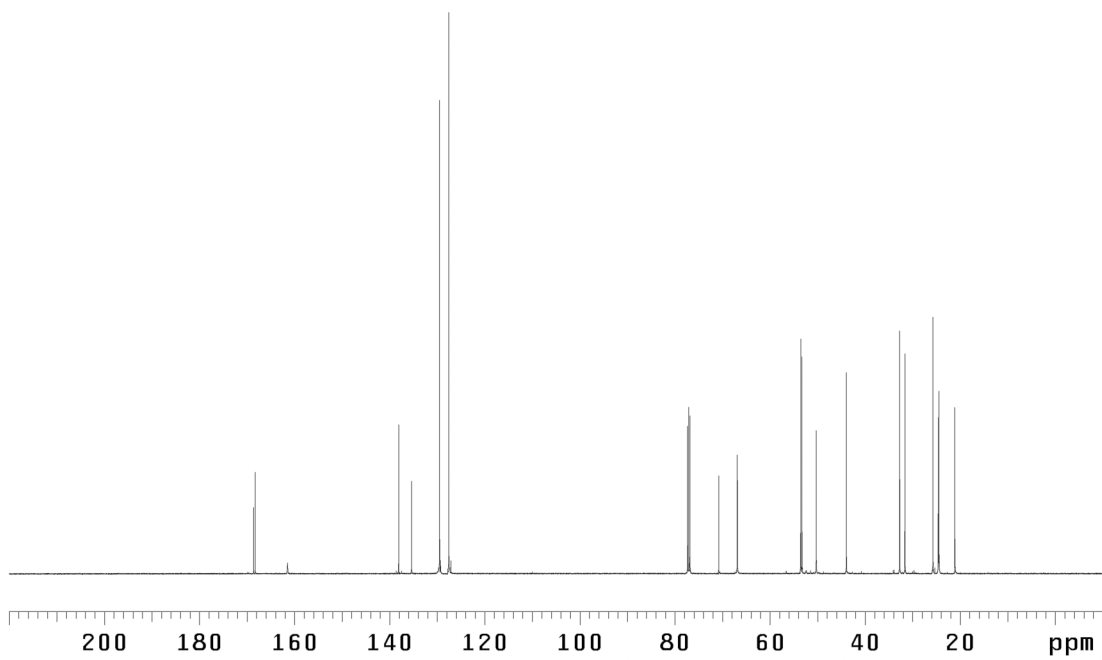<sup>13</sup>C NMR (126 MHz, CDCl<sub>3</sub>) of compound **21**.

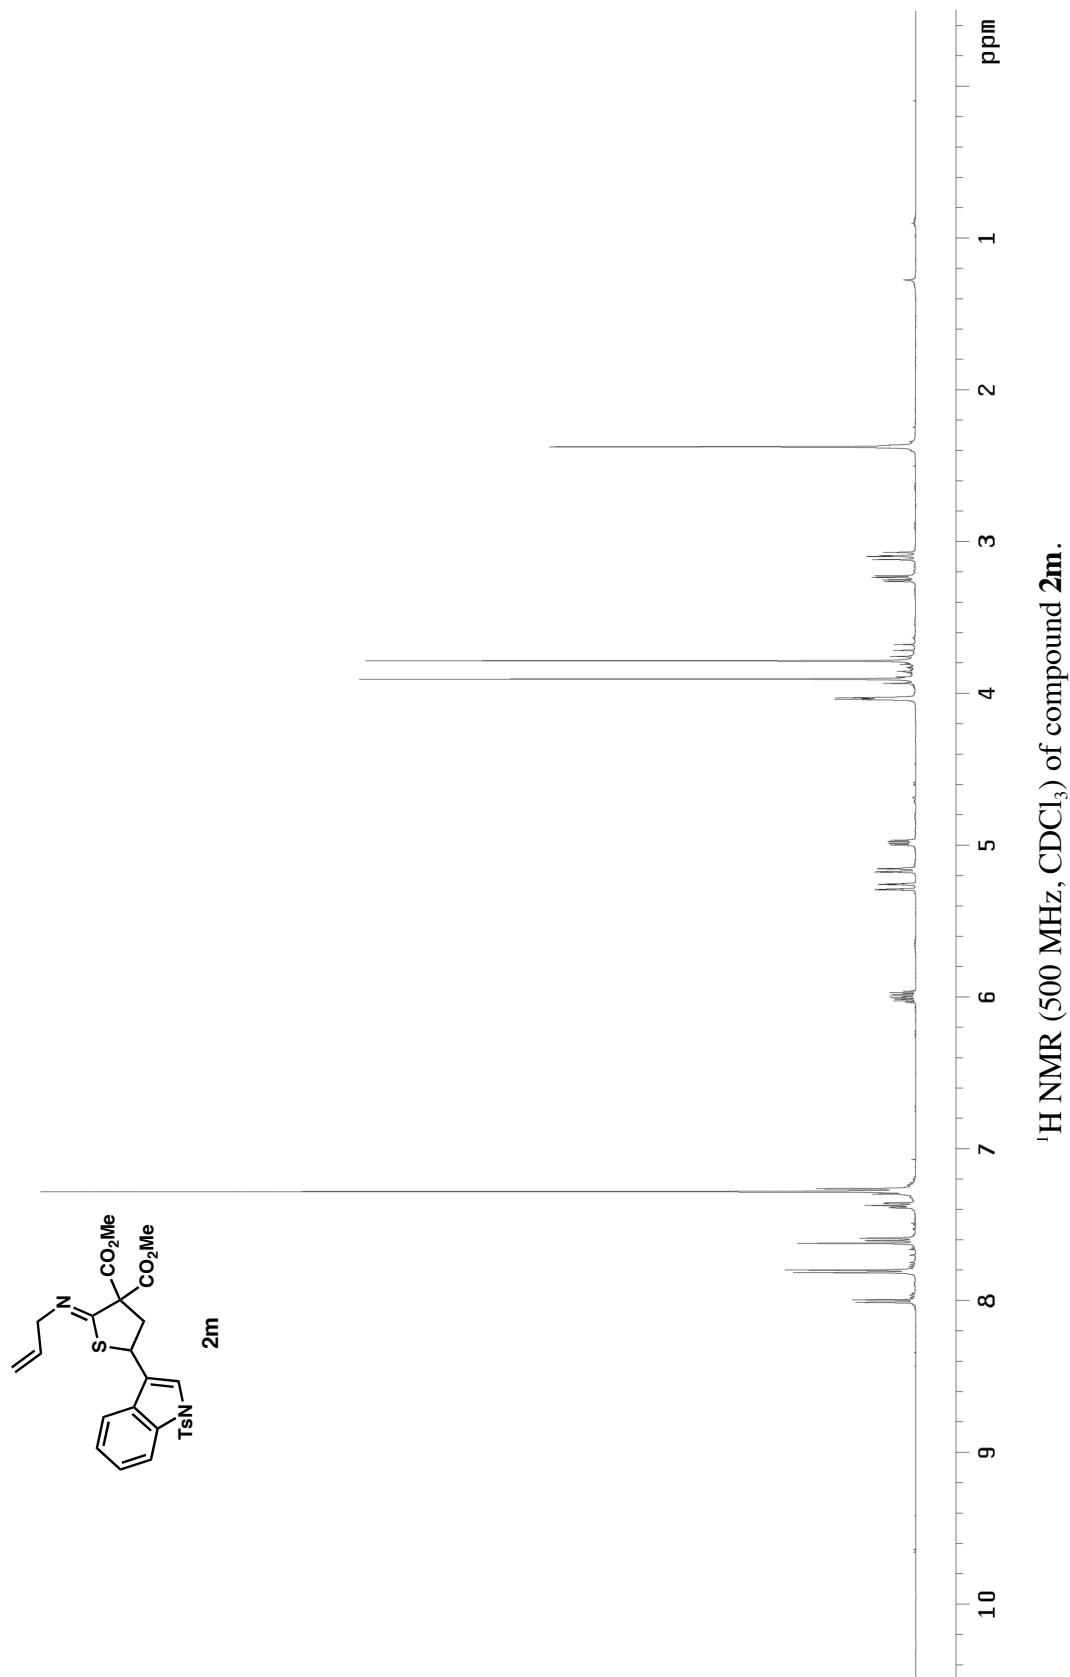

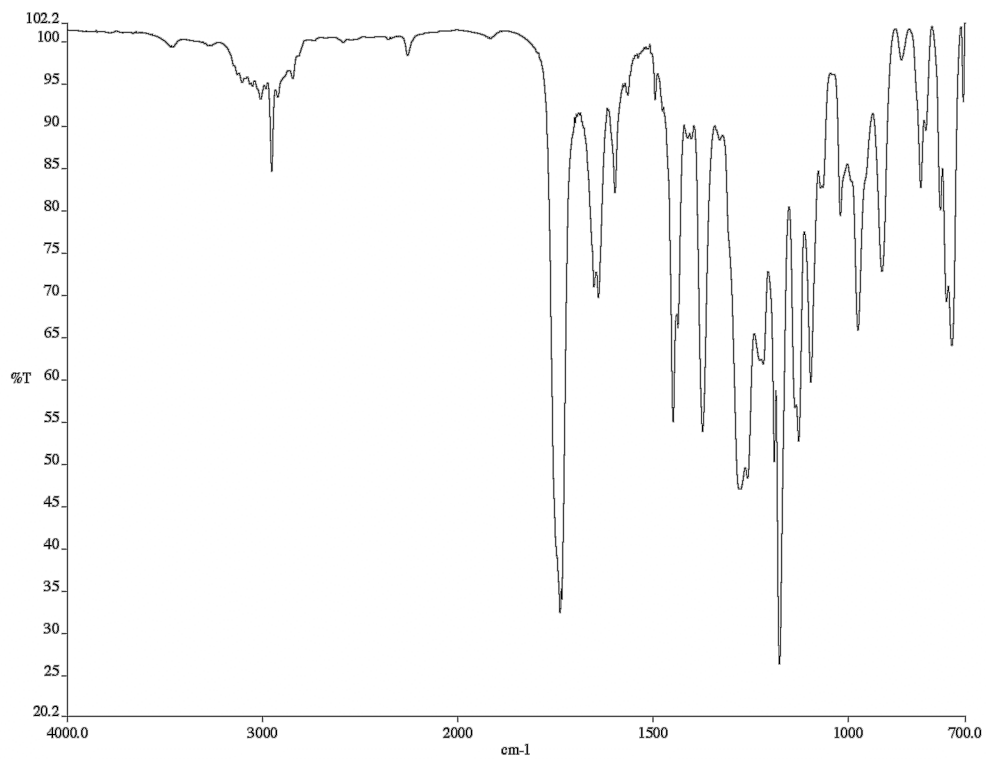Infrared spectrum (thin film/NaCl) of compound **2m**.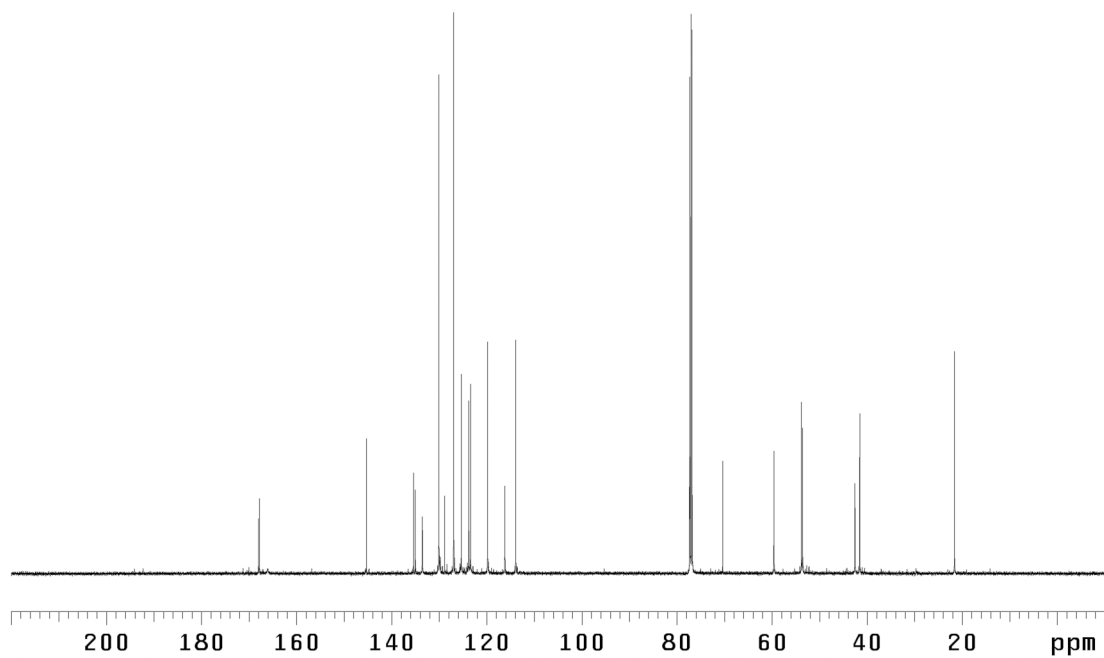 $^{13}\text{C}$  NMR (126 MHz,  $\text{CDCl}_3$ ) of compound **2m**.

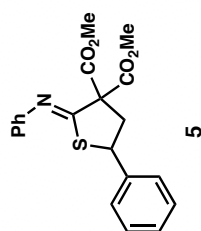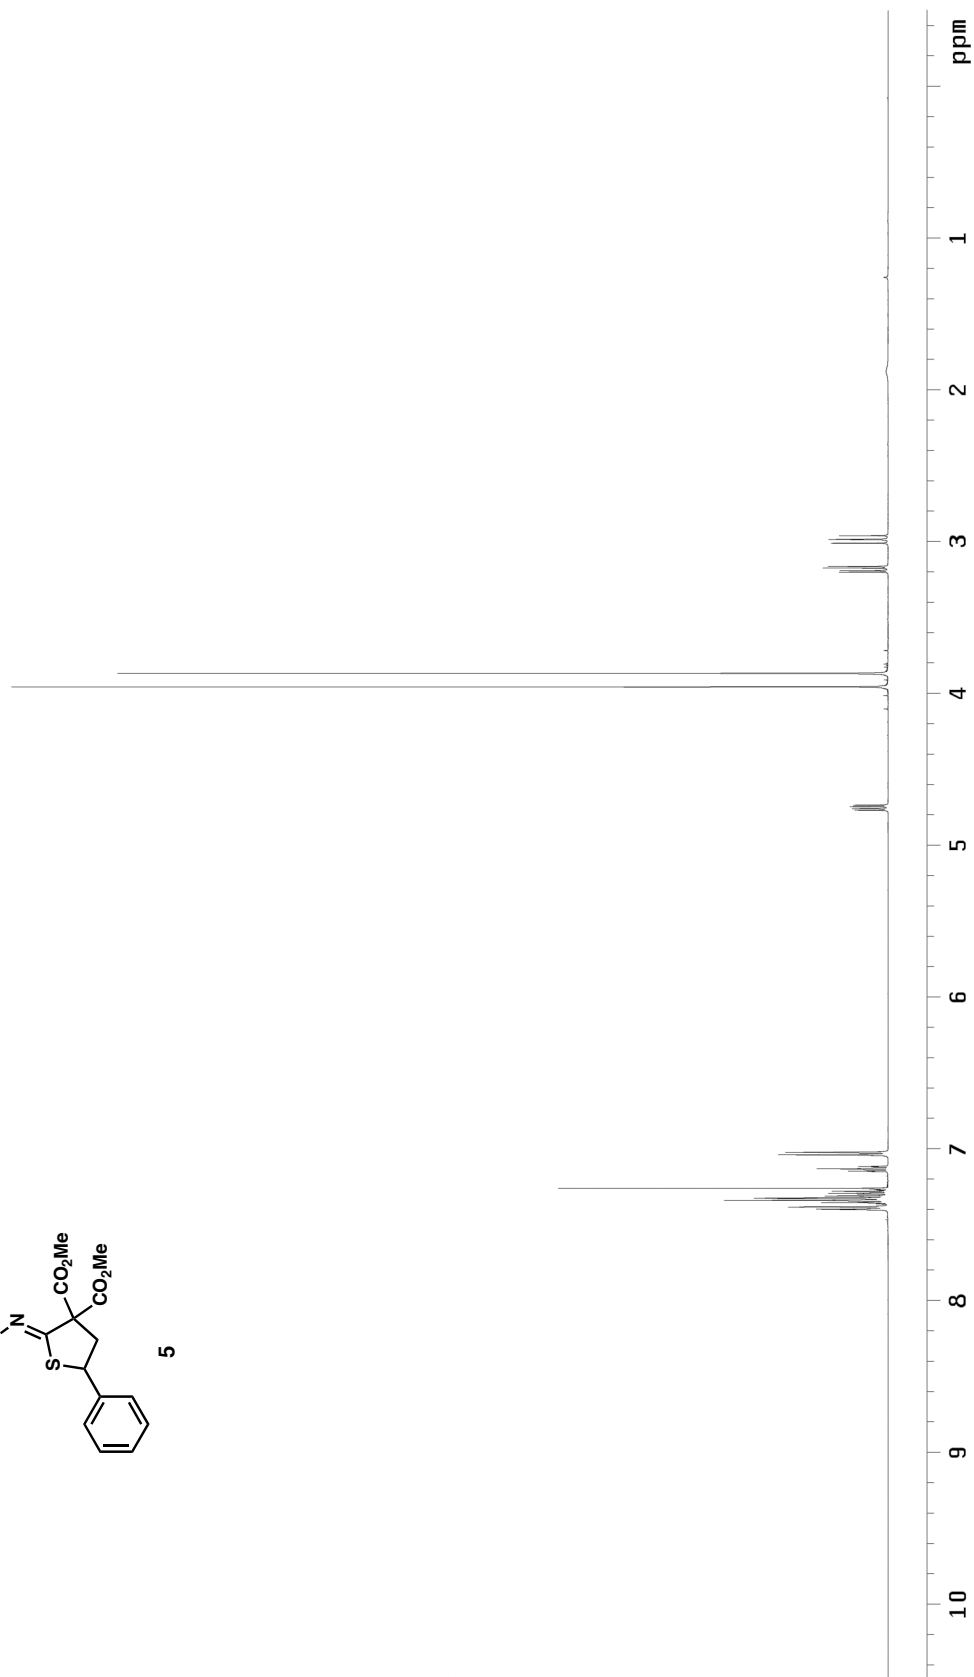

<sup>1</sup>H NMR (500 MHz, CDCl<sub>3</sub>) of compound **5**.



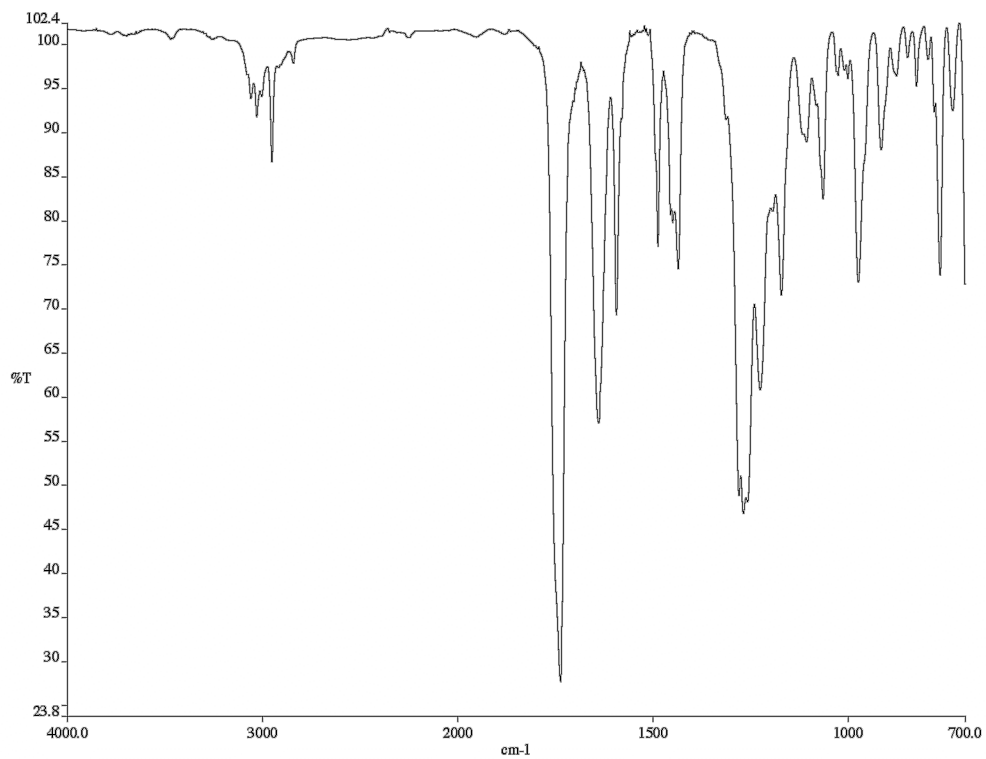Infrared spectrum (thin film/NaCl) of compound **5**.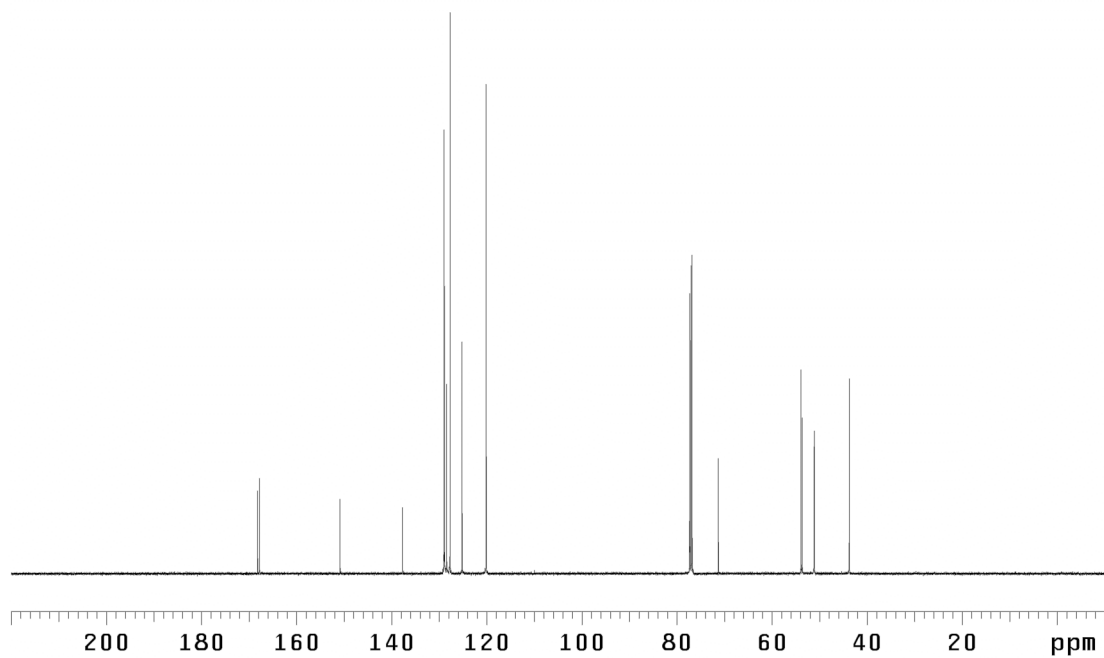<sup>13</sup>C NMR (126 MHz, CDCl<sub>3</sub>) of compound **5**.

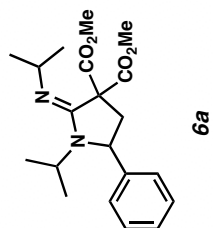**6a**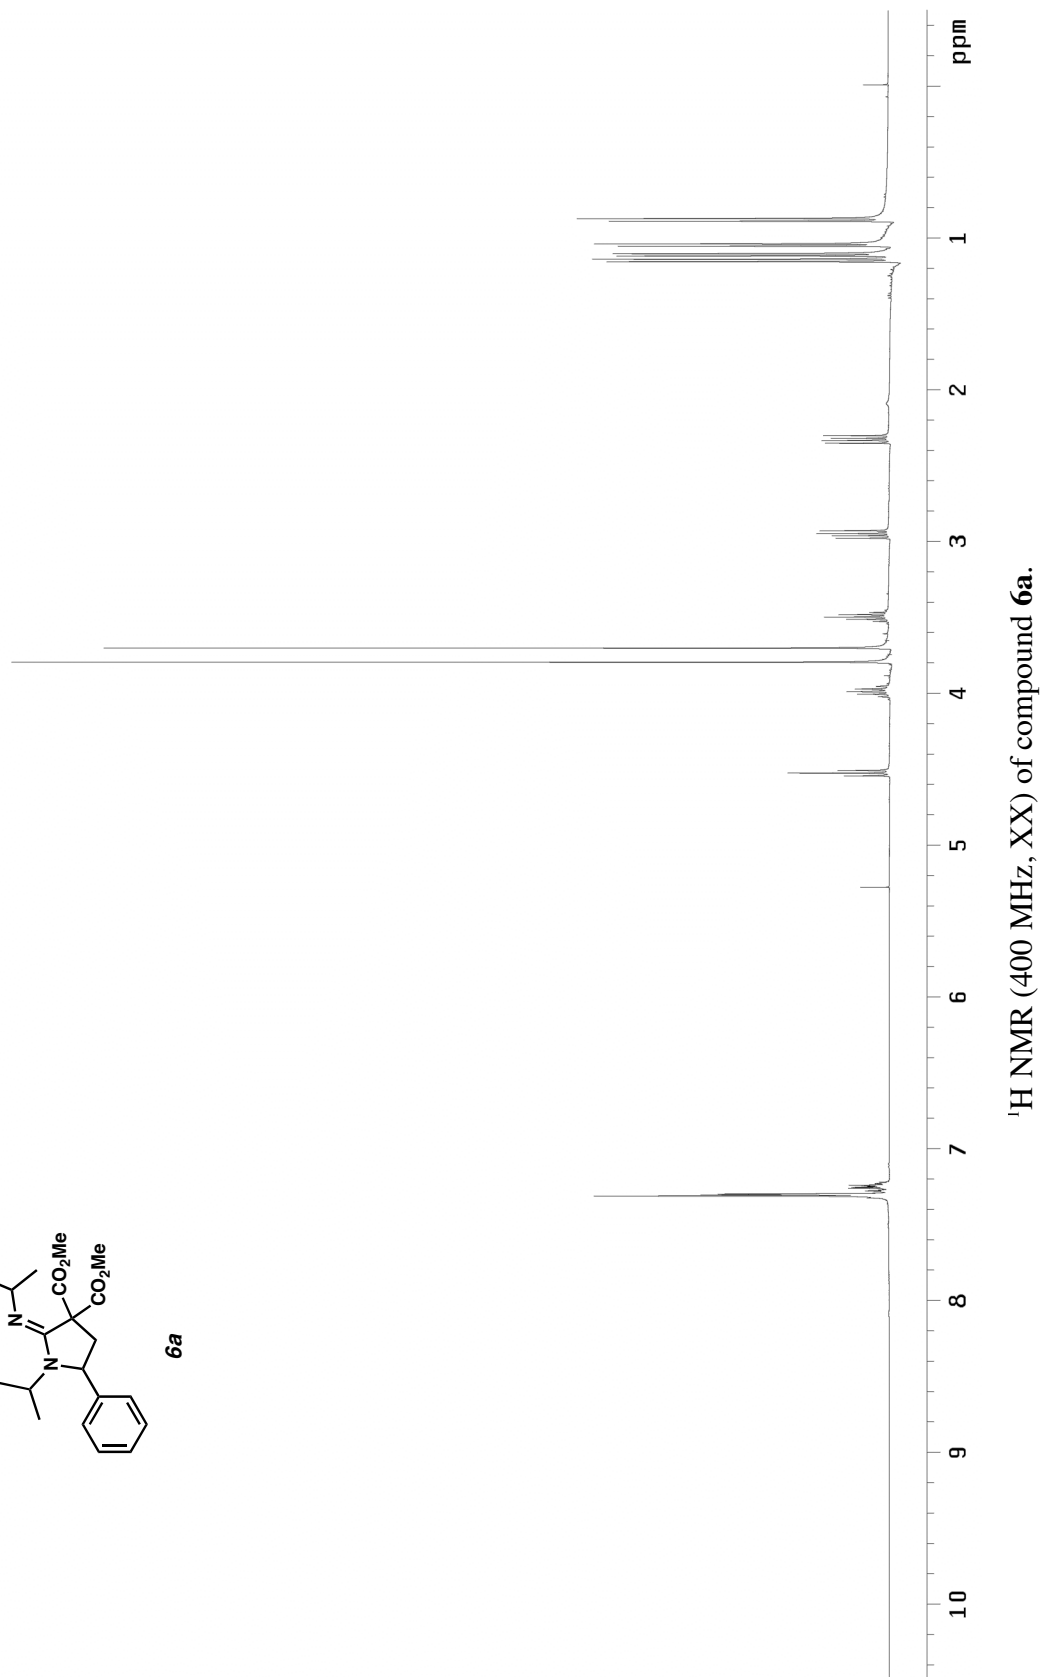

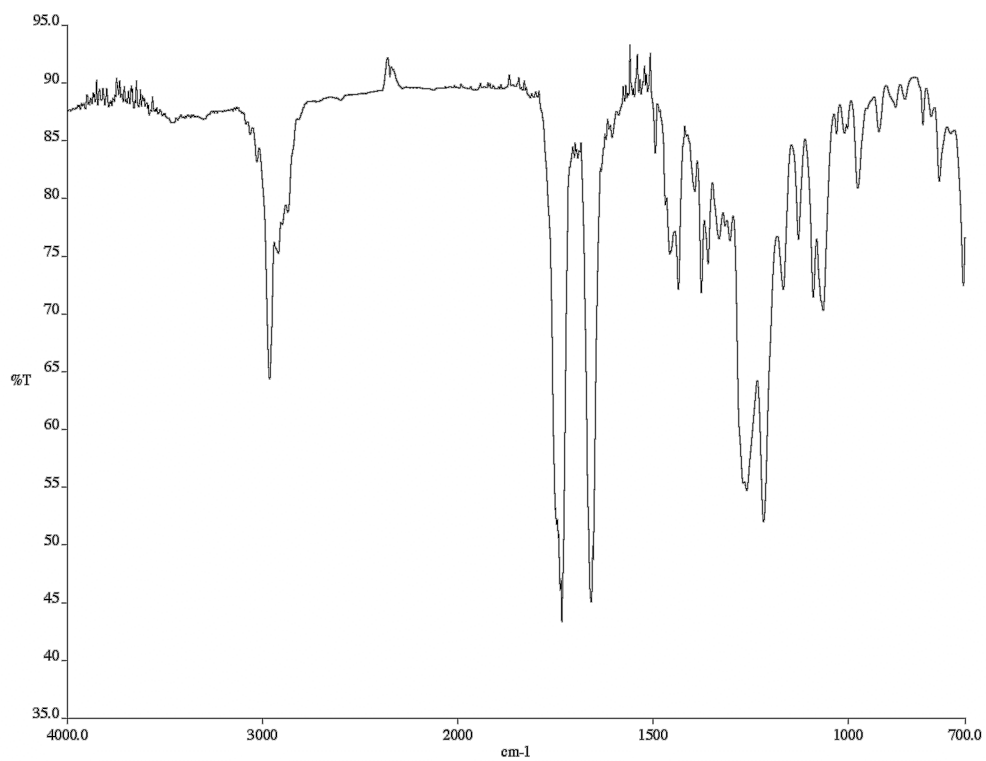Infrared spectrum (thin film/NaCl) of compound **6a**.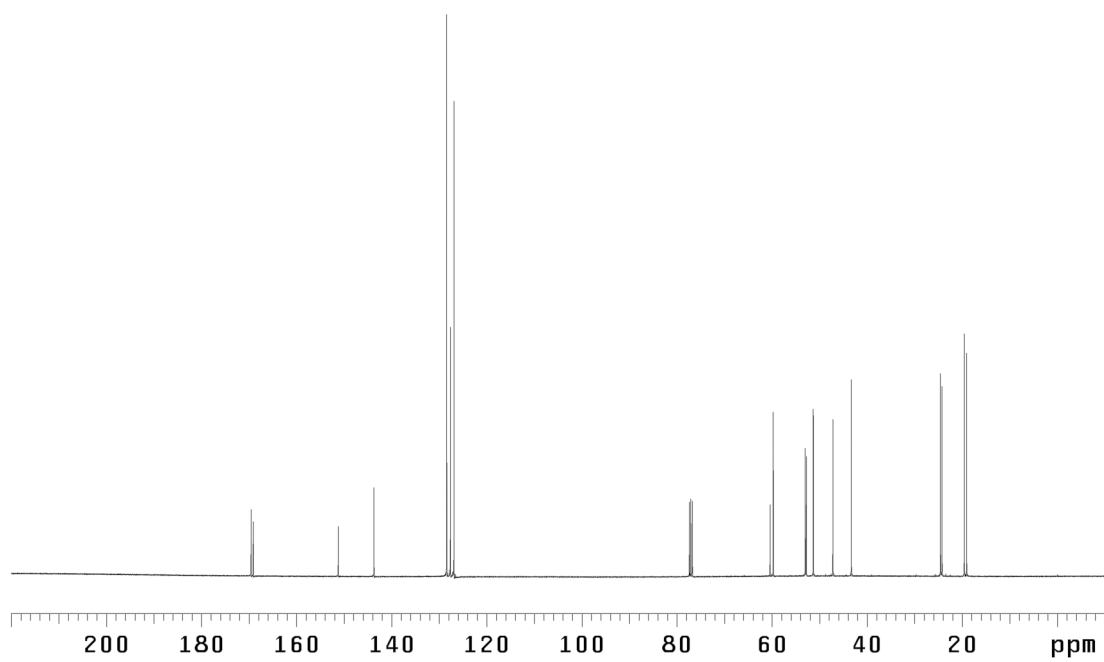 $^{13}\text{C}$  NMR (101 MHz,  $\text{CDCl}_3$ ) of compound **6a**.

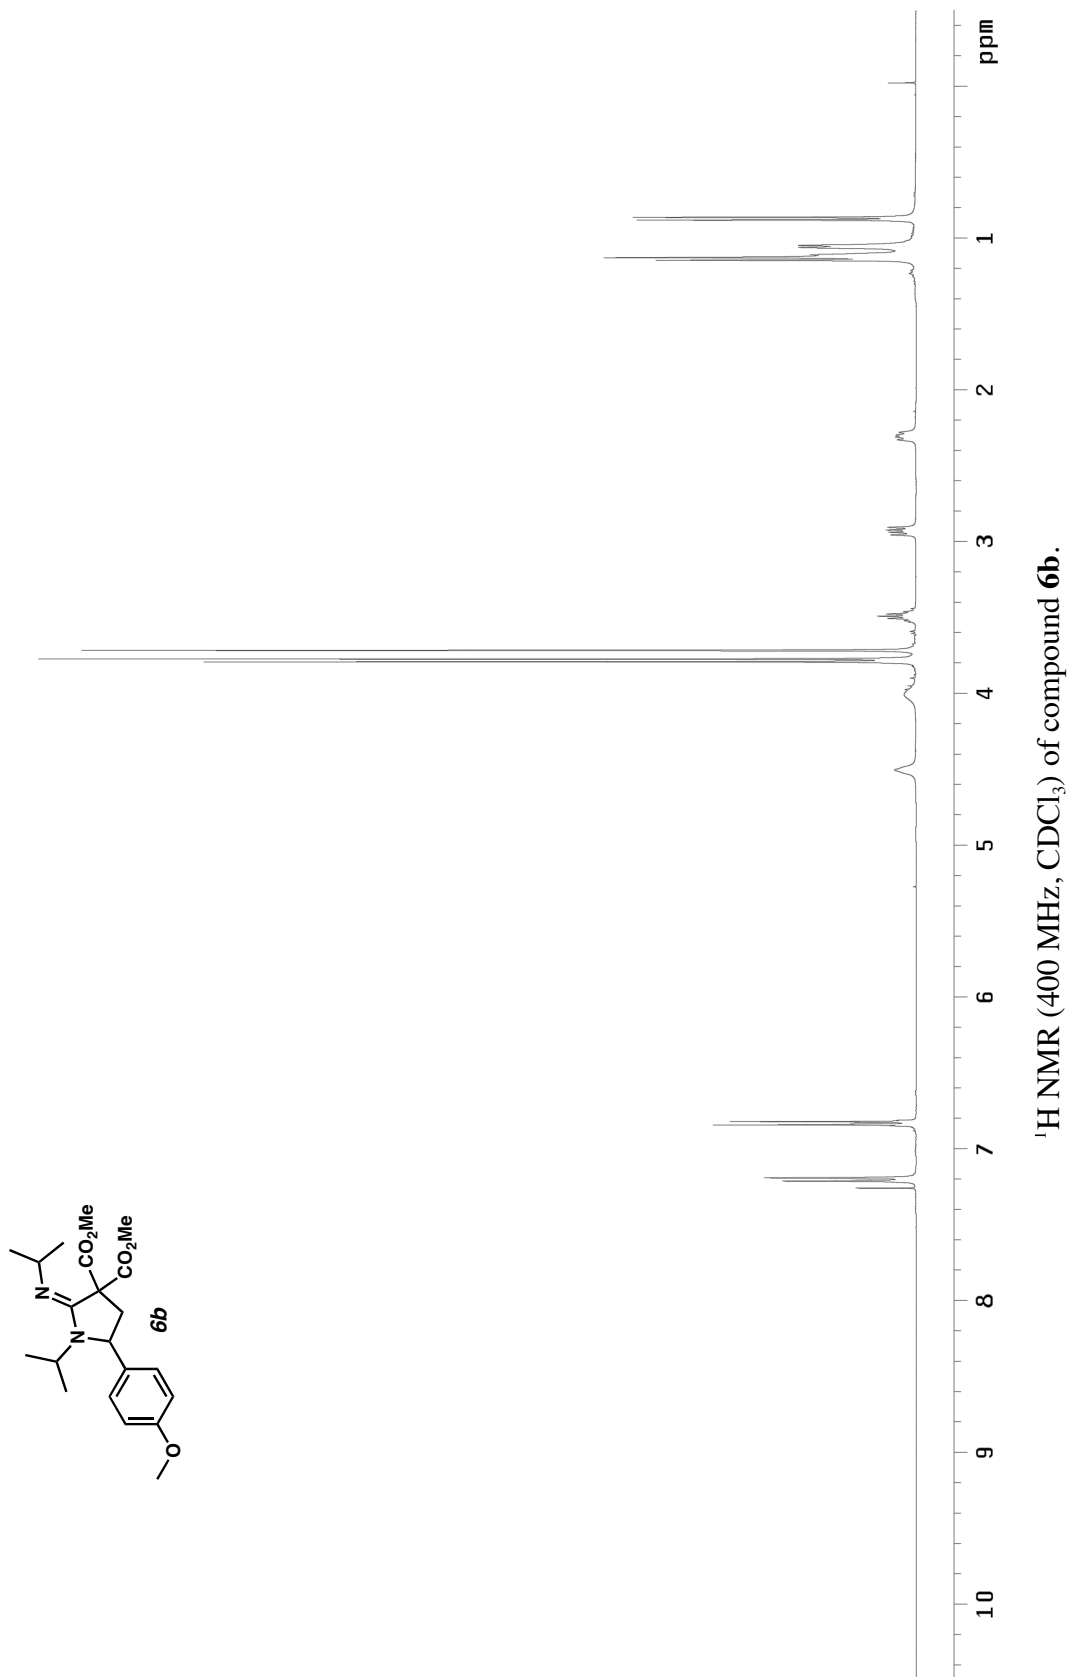

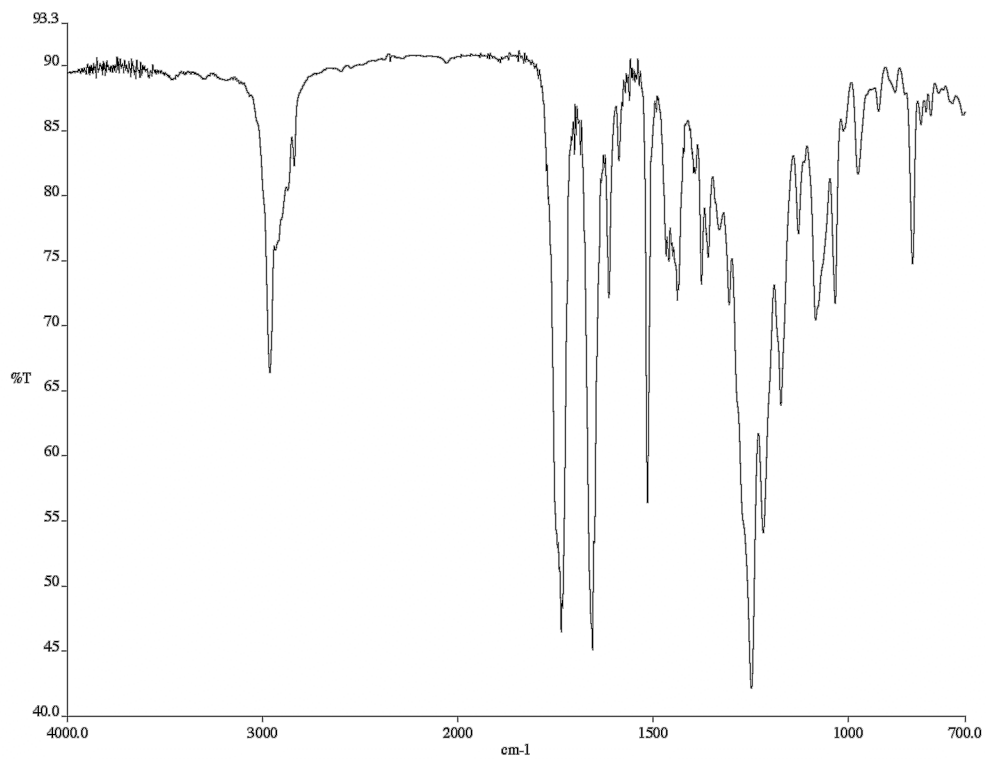Infrared spectrum (thin film/NaCl) of compound **6b**.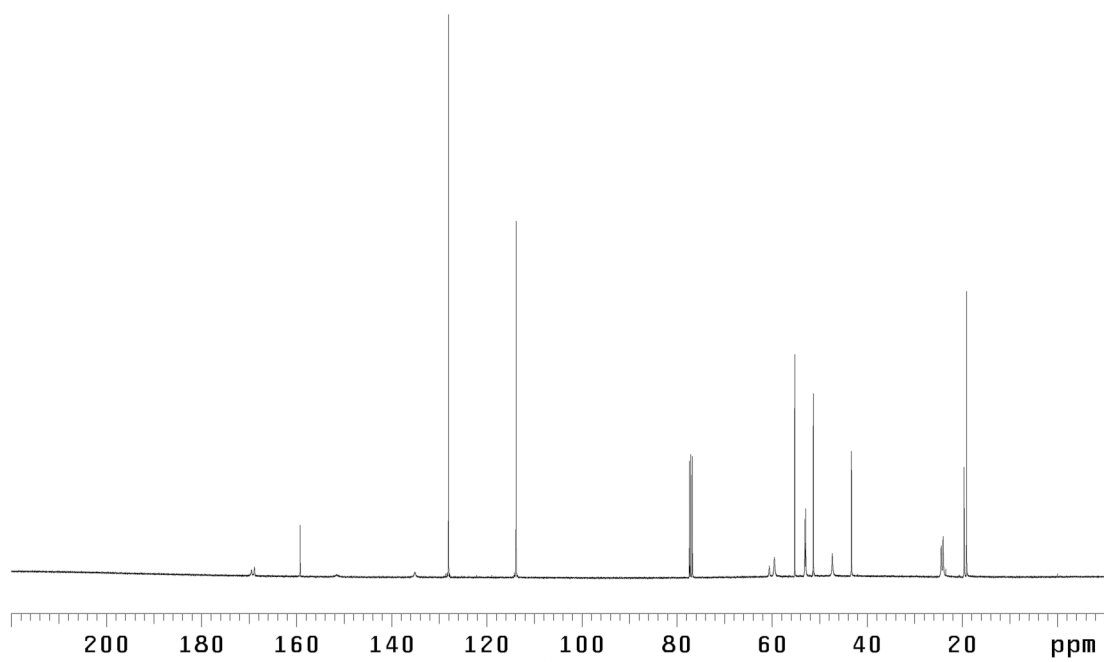<sup>13</sup>C NMR (101 MHz, CDCl<sub>3</sub>) of compound **6b**.

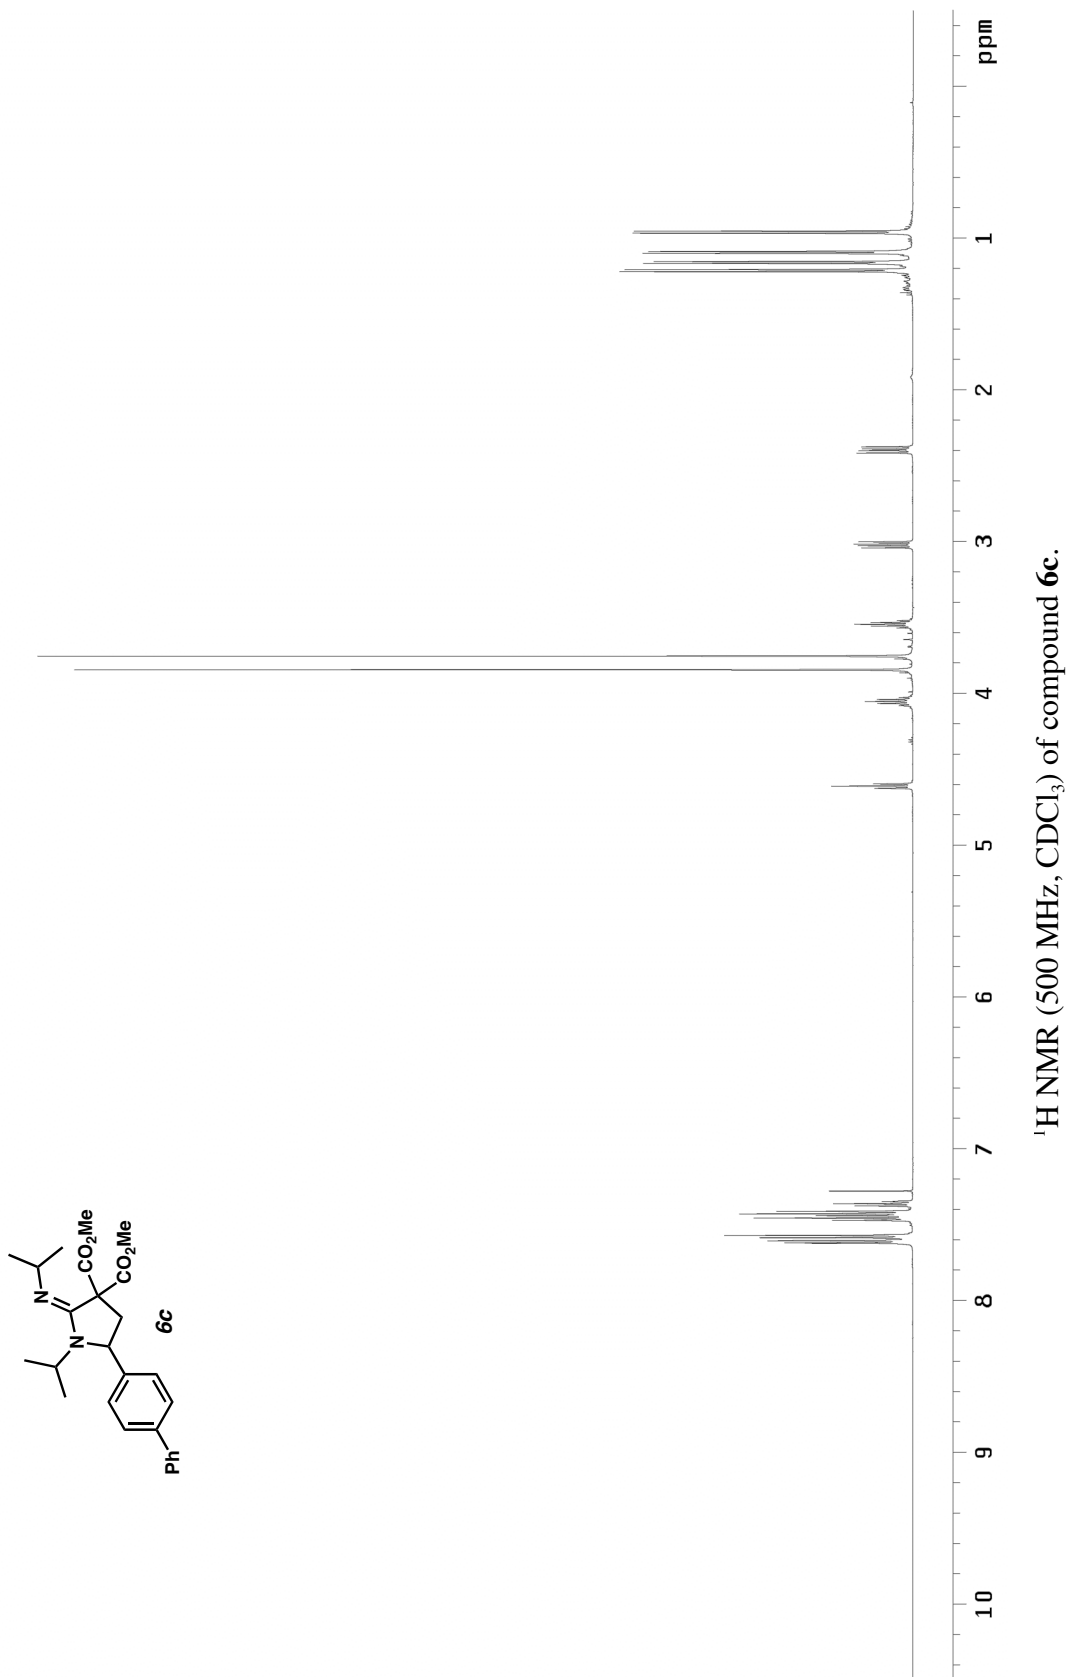

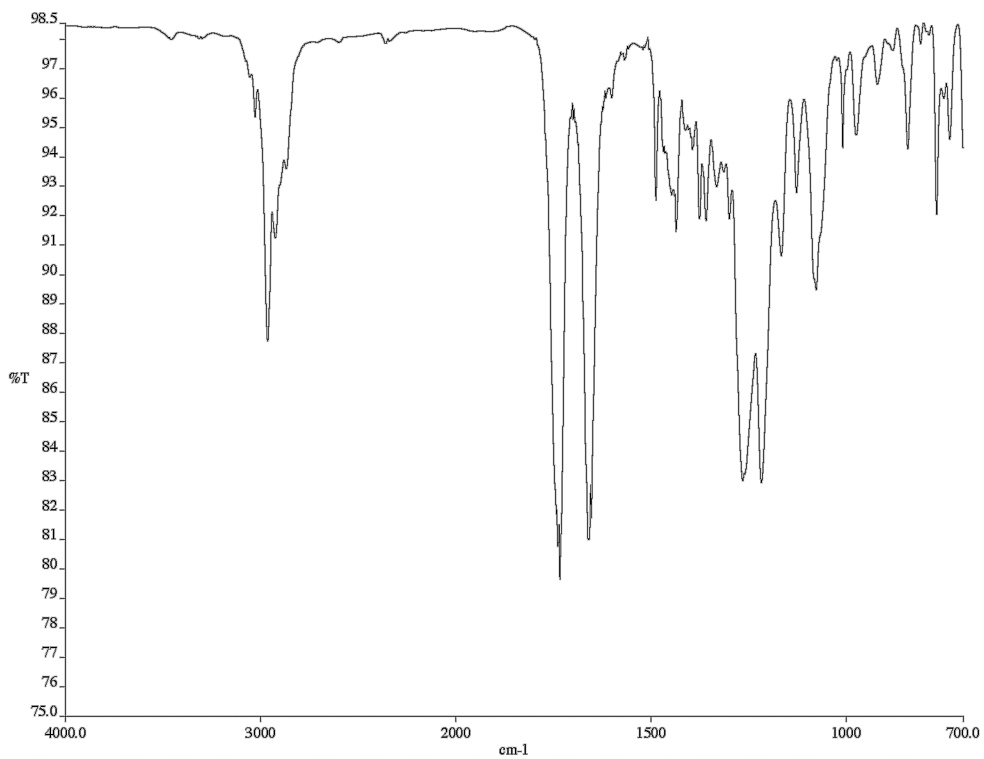Infrared spectrum (thin film/NaCl) of compound **6c**.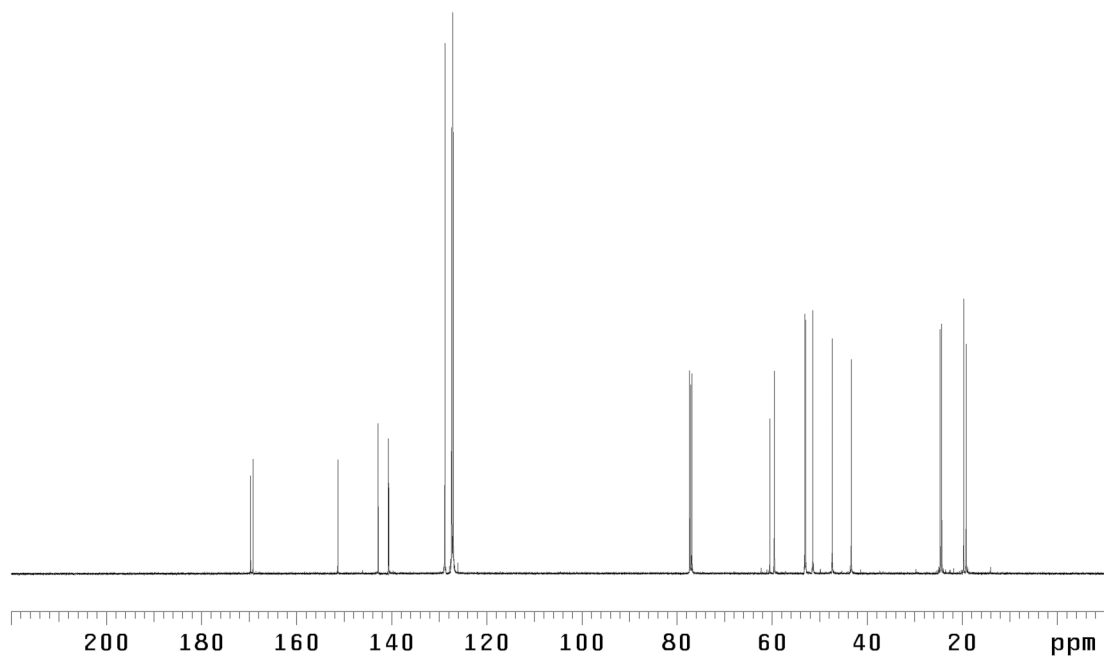<sup>13</sup>C NMR (126 MHz, CDCl<sub>3</sub>) of compound **6c**.

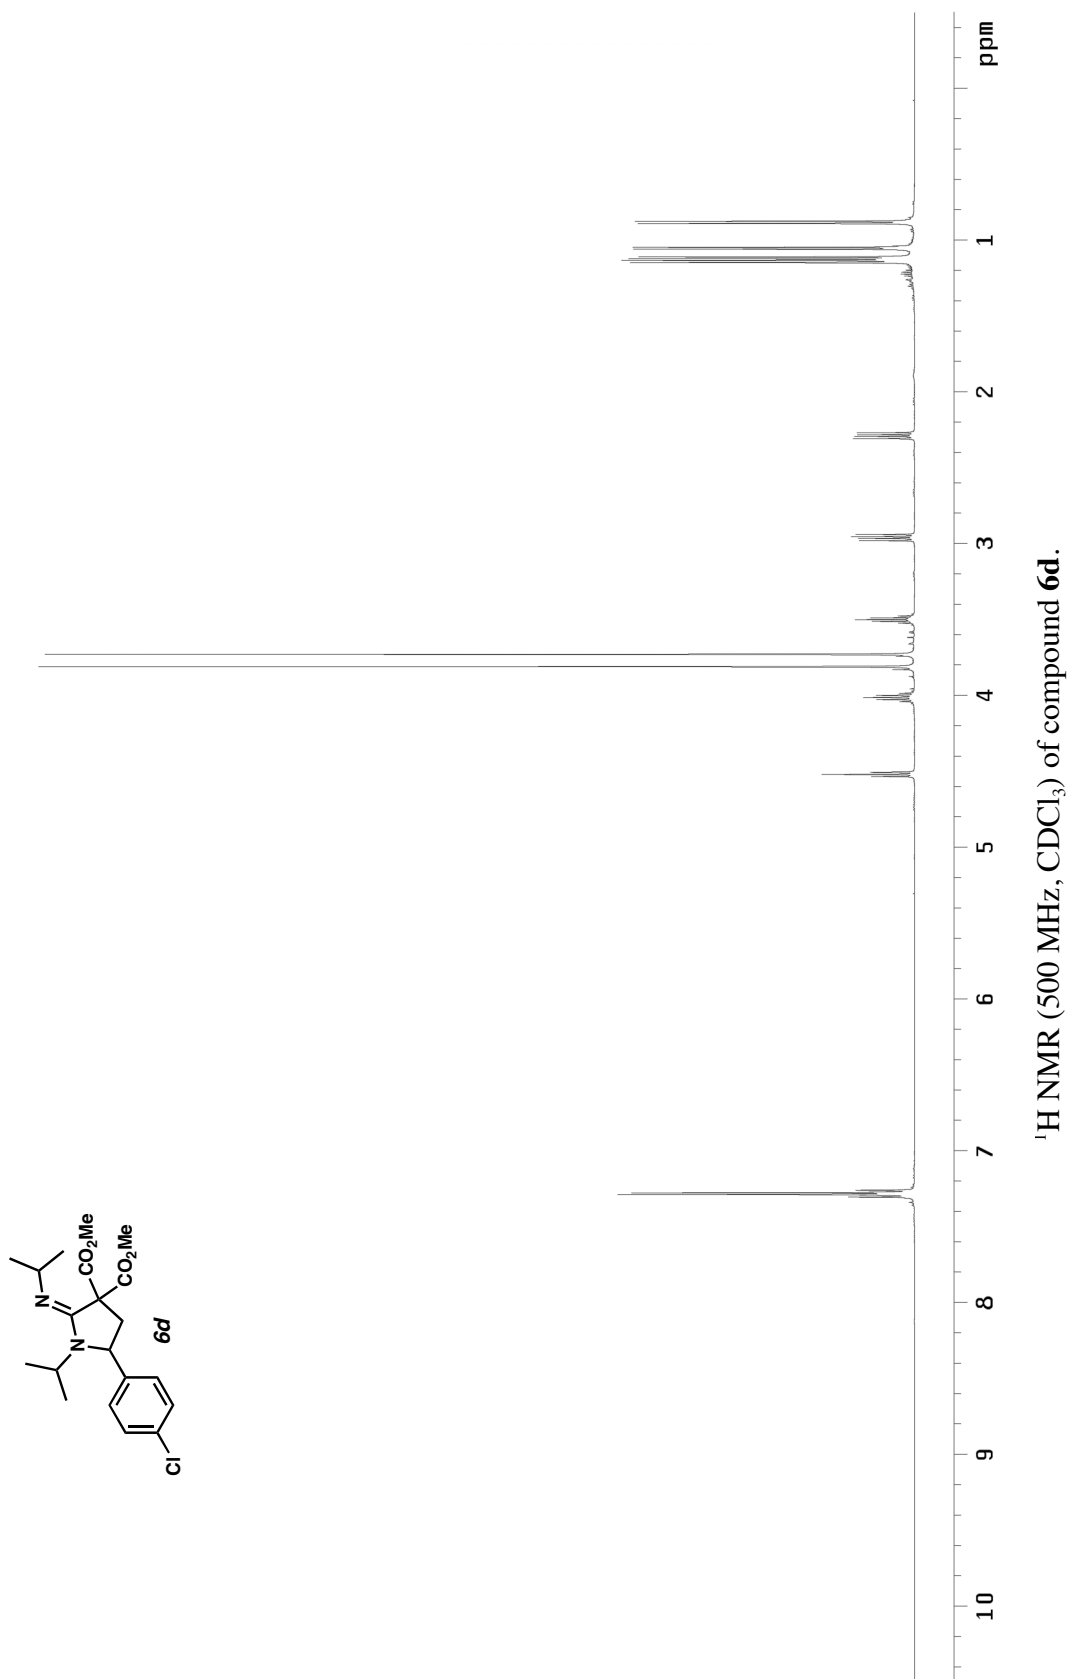



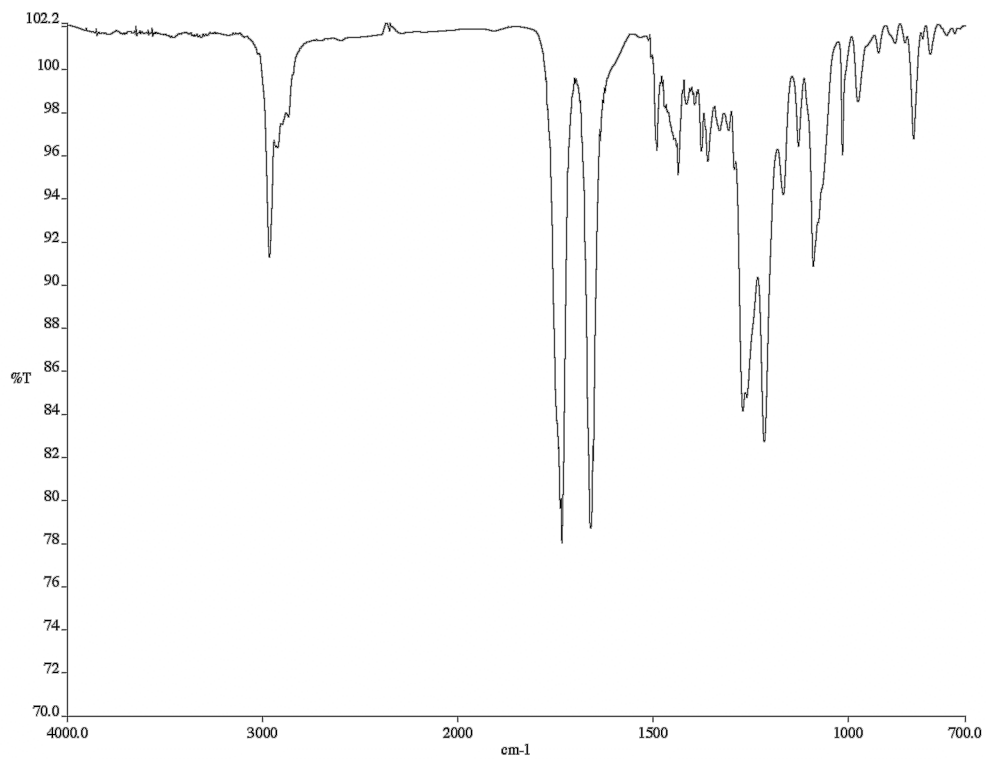Infrared spectrum (thin film/NaCl) of compound **6d**.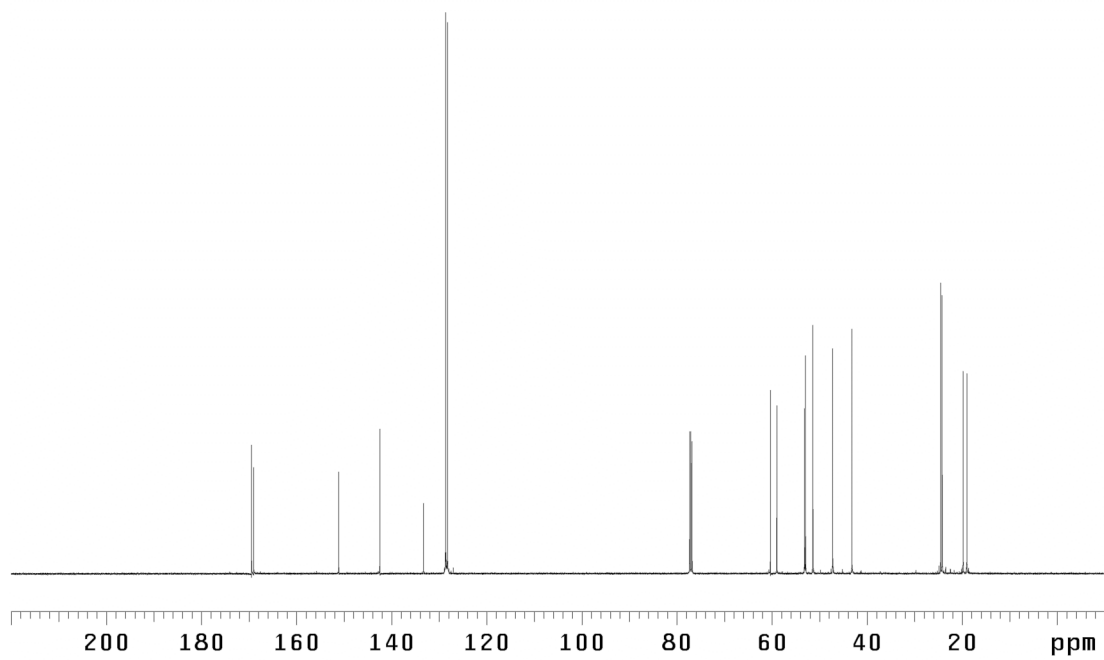<sup>13</sup>C NMR (126 MHz, CDCl<sub>3</sub>) of compound **6d**.

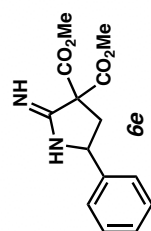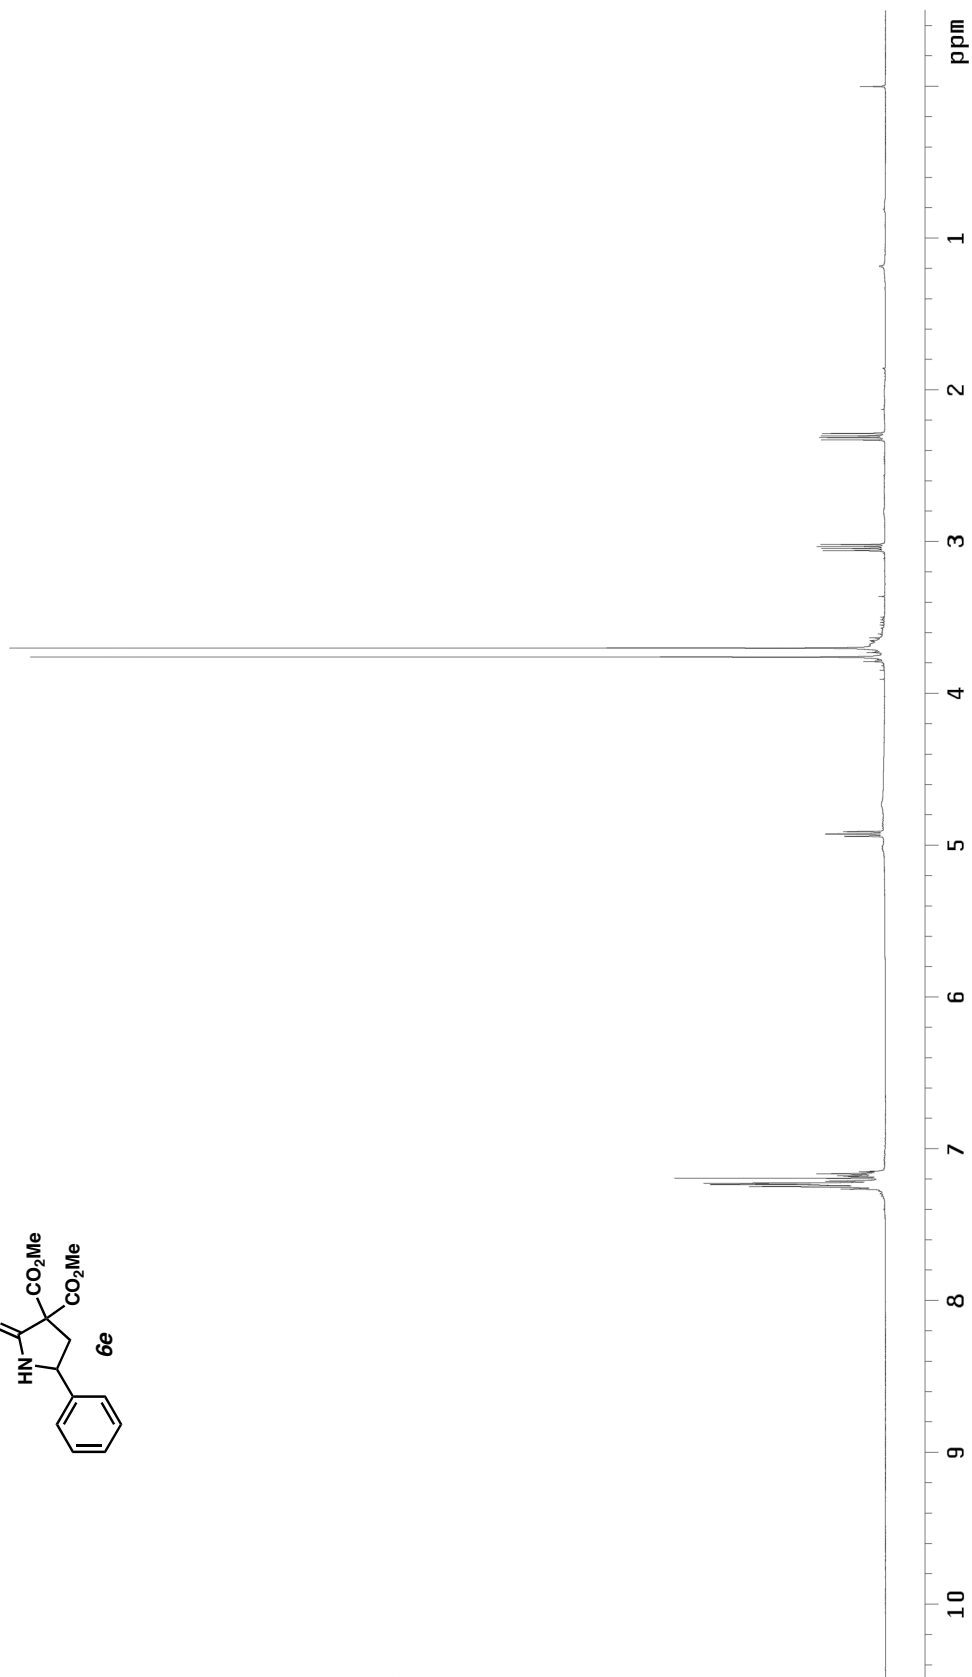

<sup>1</sup>H NMR (500 MHz, CDCl<sub>3</sub>) of compound **6e**.

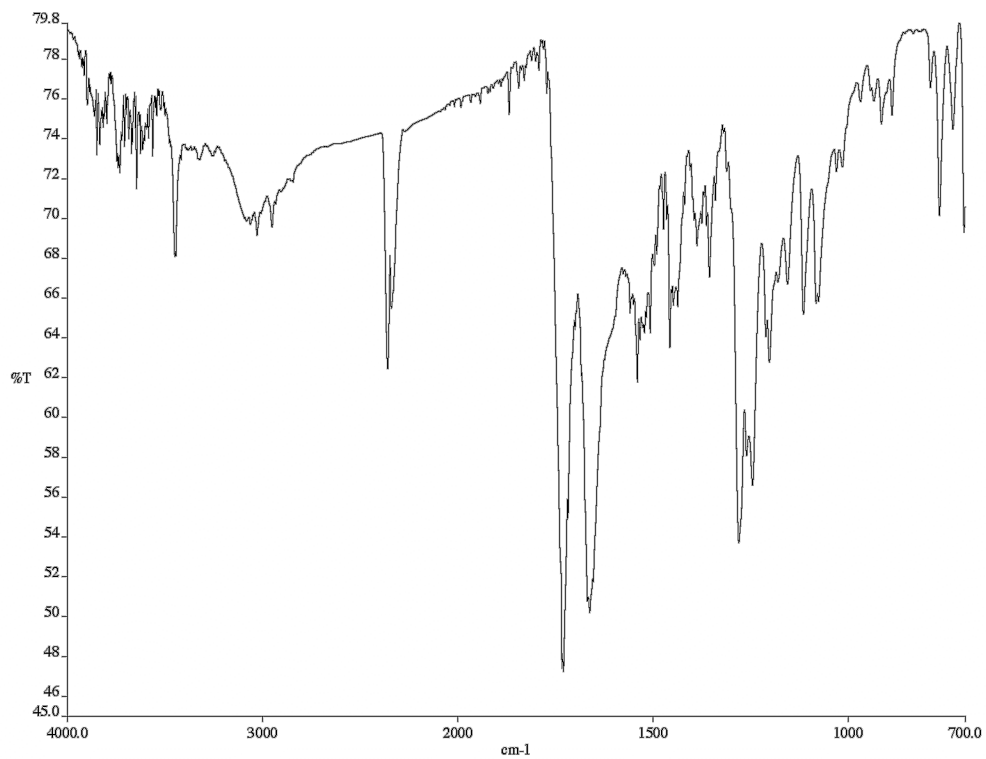Infrared spectrum (thin film/NaCl) of compound **6e**.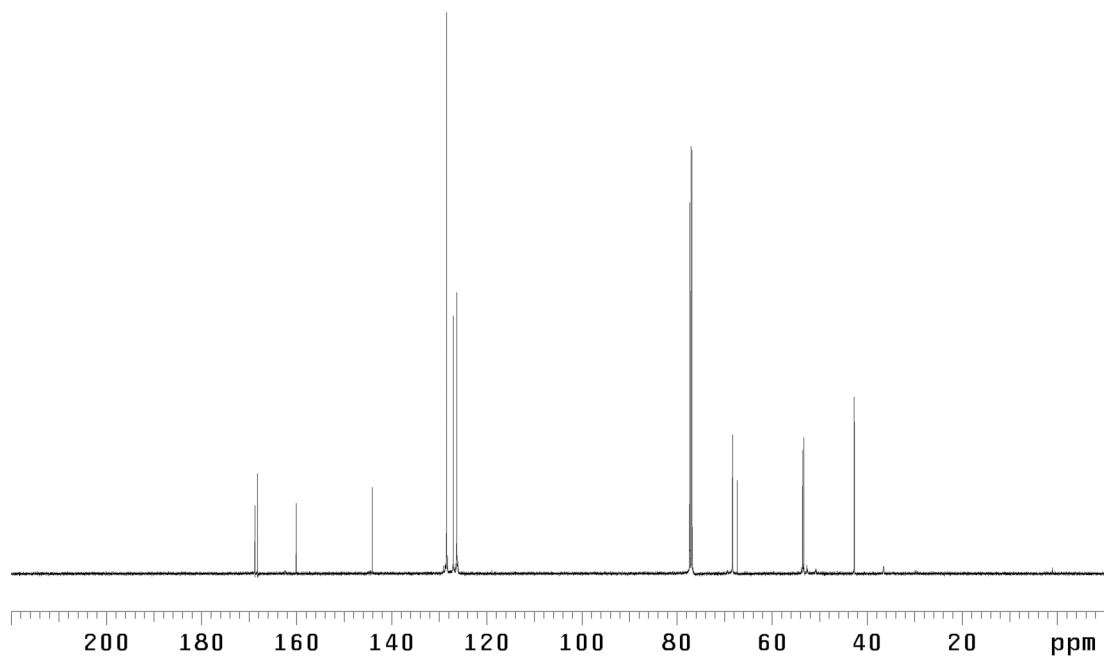<sup>13</sup>C NMR (126 MHz, CDCl<sub>3</sub>) of compound **6e**.

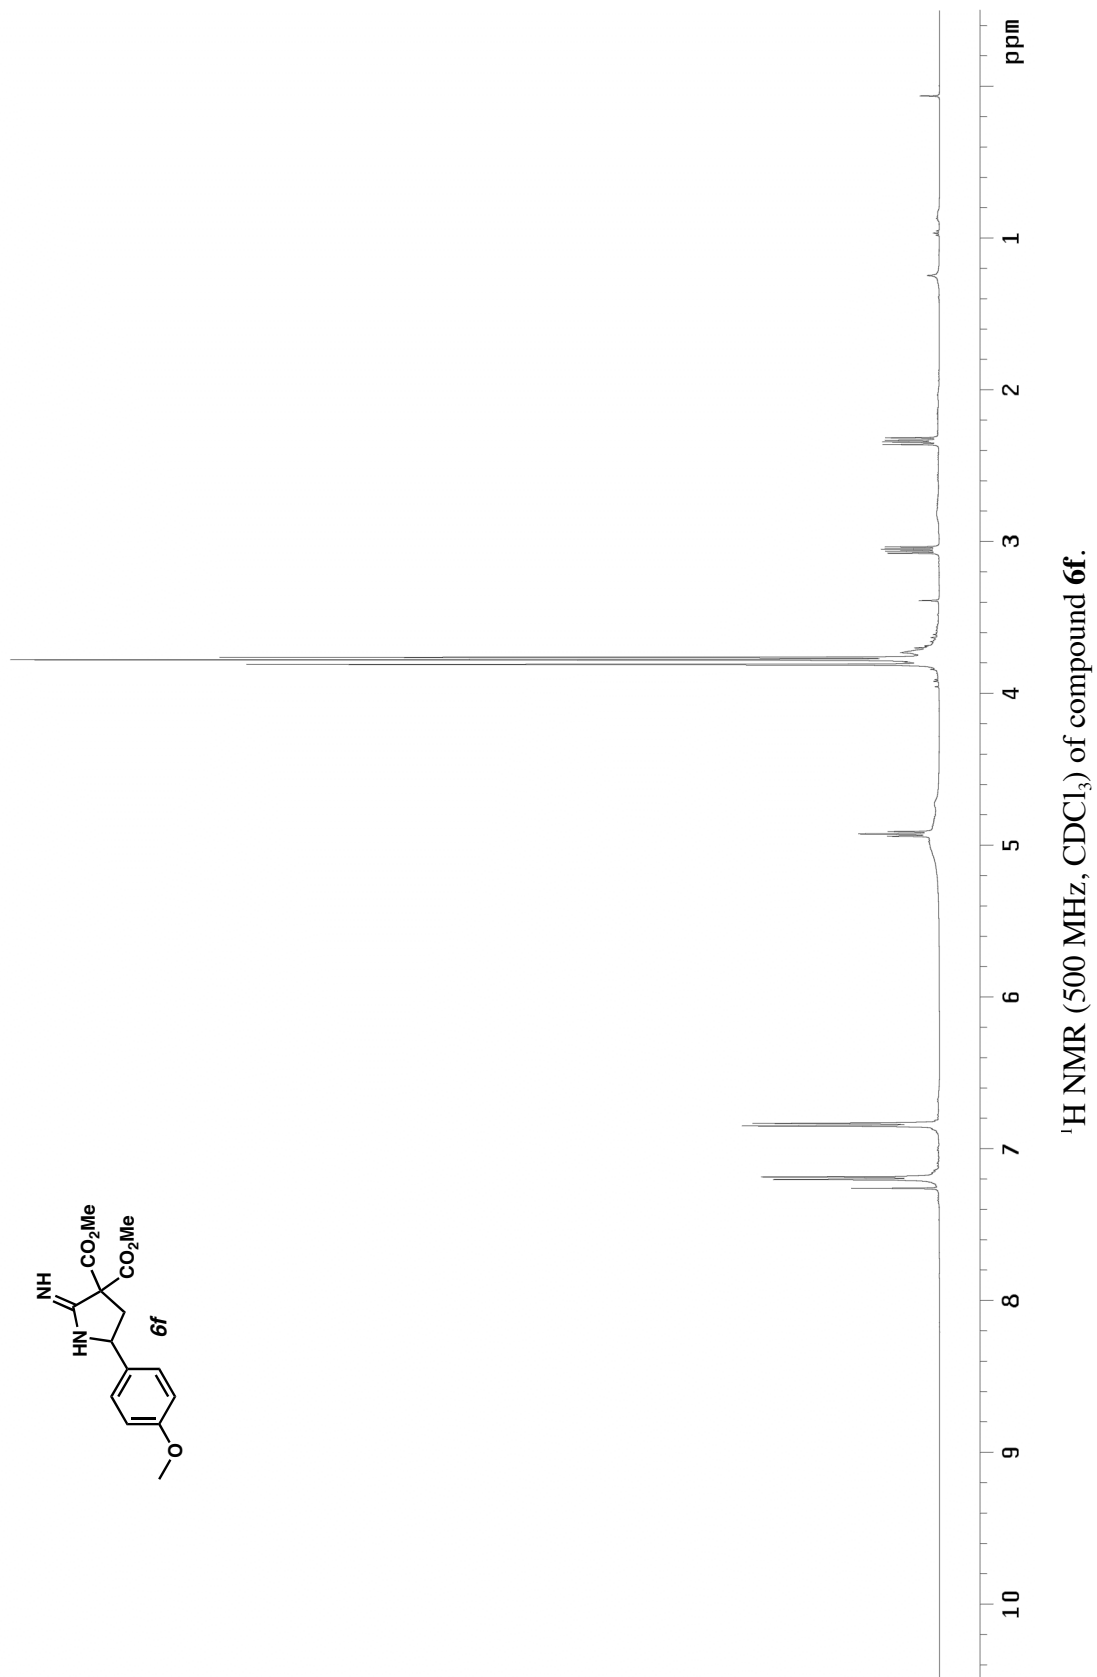

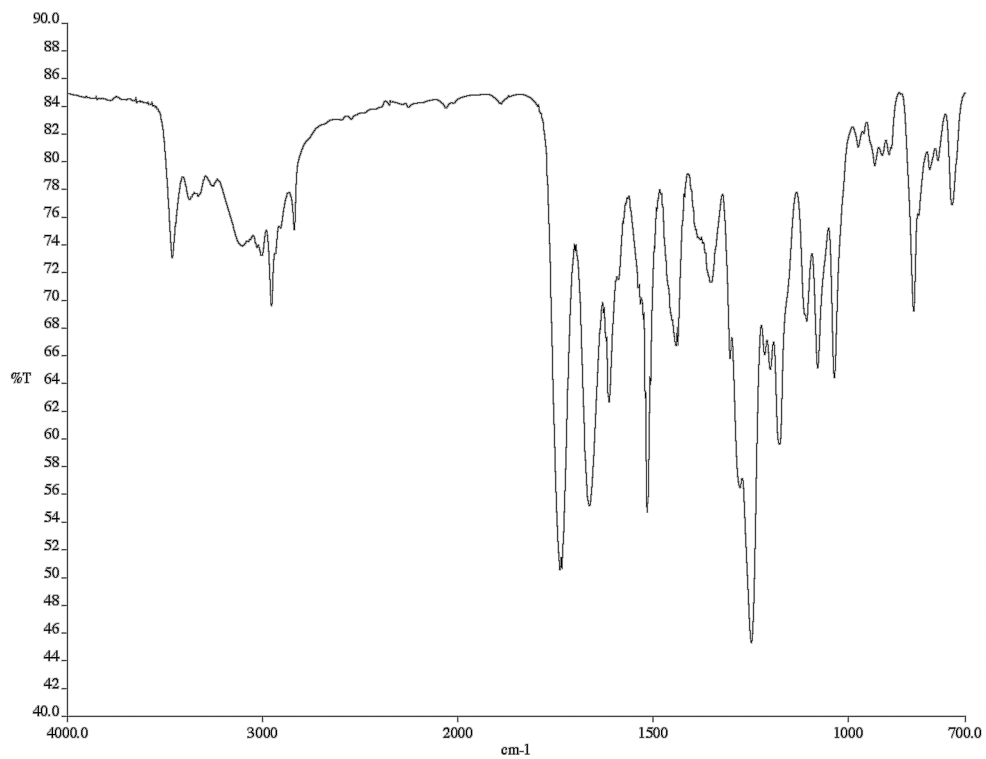Infrared spectrum (thin film/NaCl) of compound **6f**.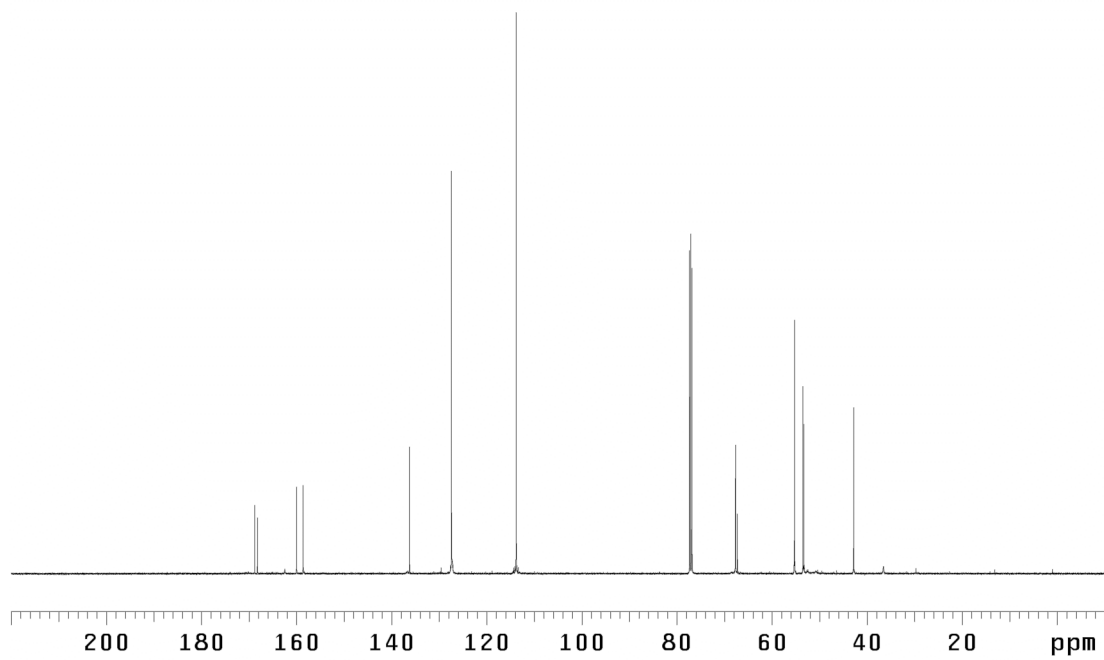<sup>13</sup>C NMR (126 MHz, CDCl<sub>3</sub>) of compound **6f**.

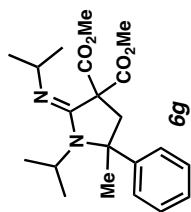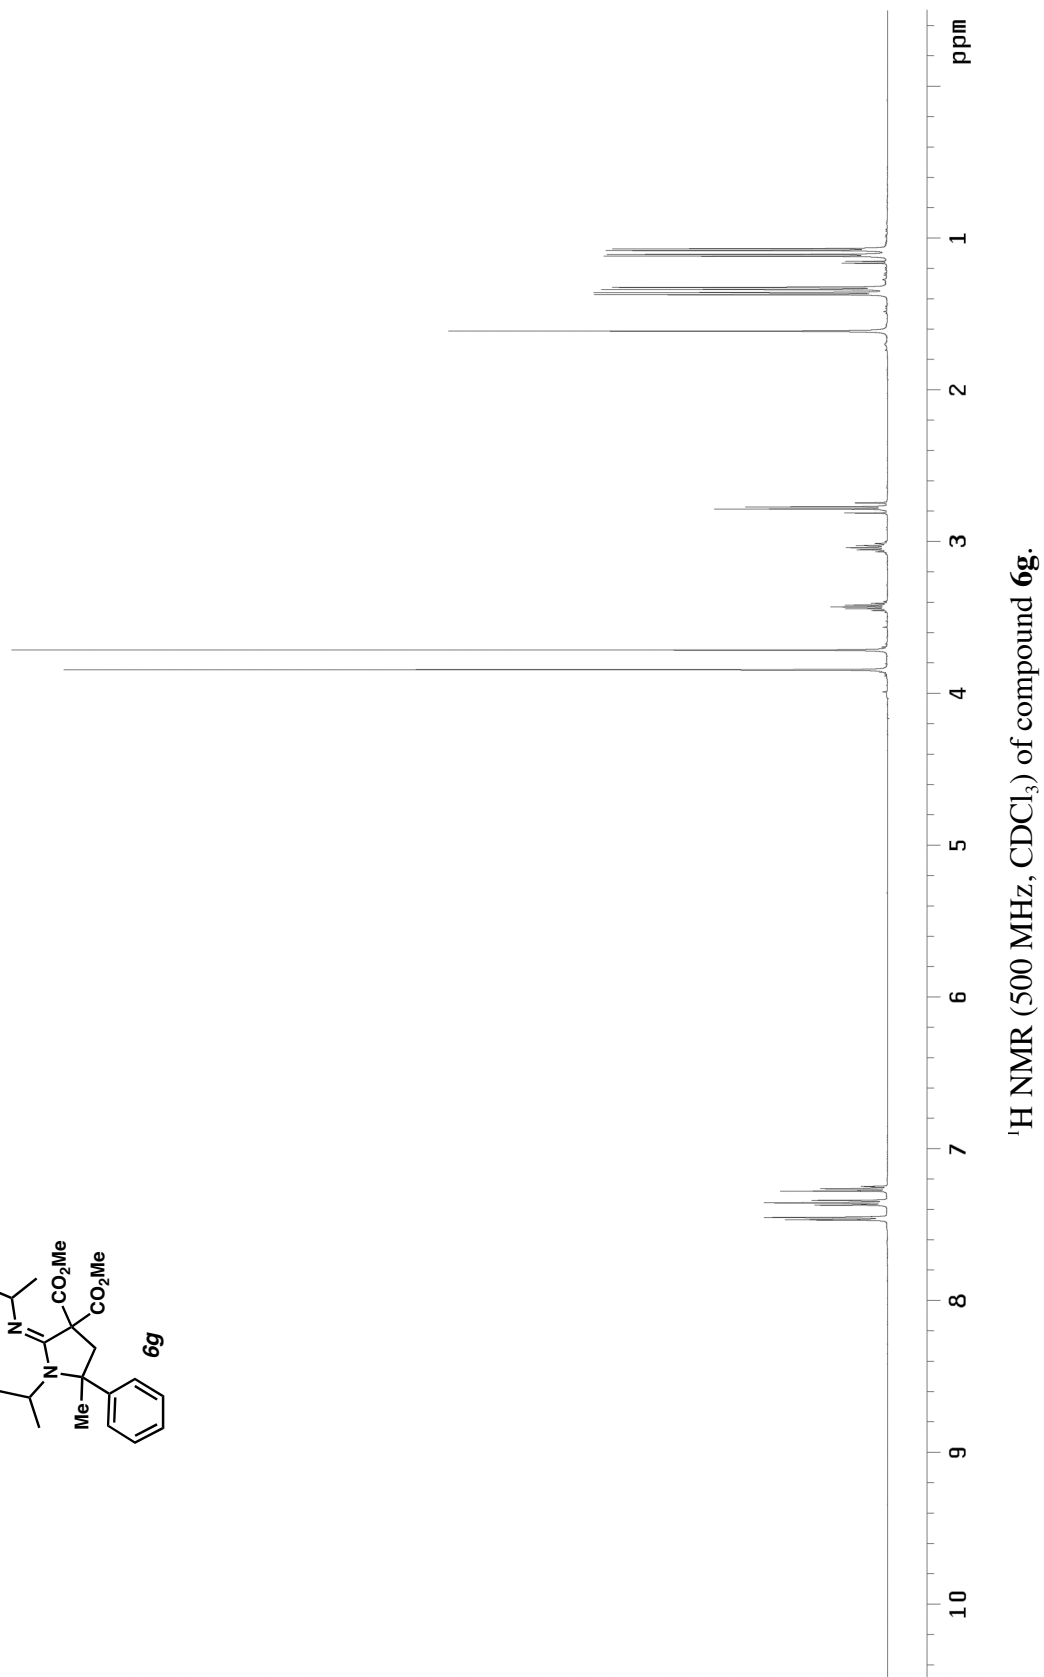

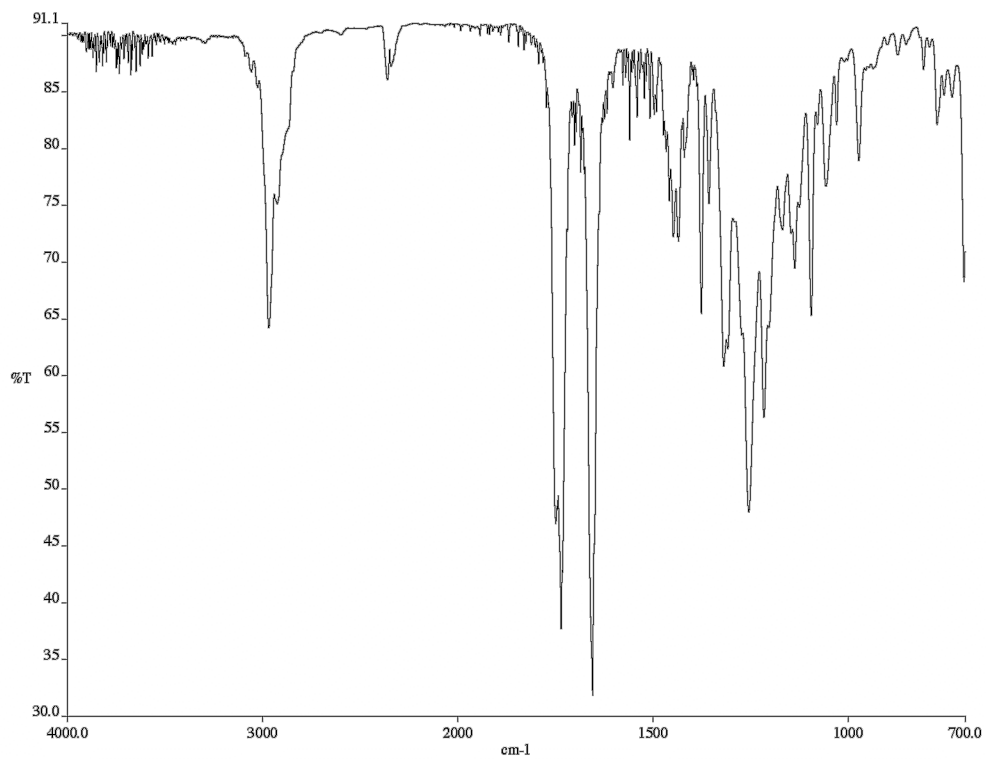Infrared spectrum (thin film/NaCl) of compound **6g**.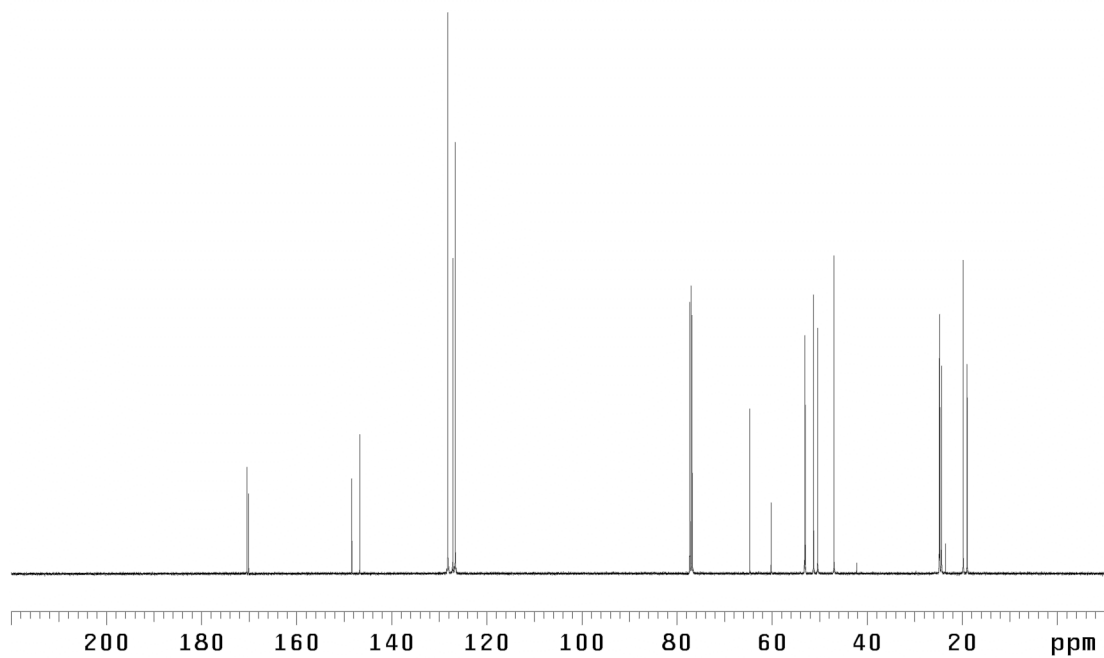<sup>13</sup>C NMR (126 MHz, CDCl<sub>3</sub>) of compound **6g**.

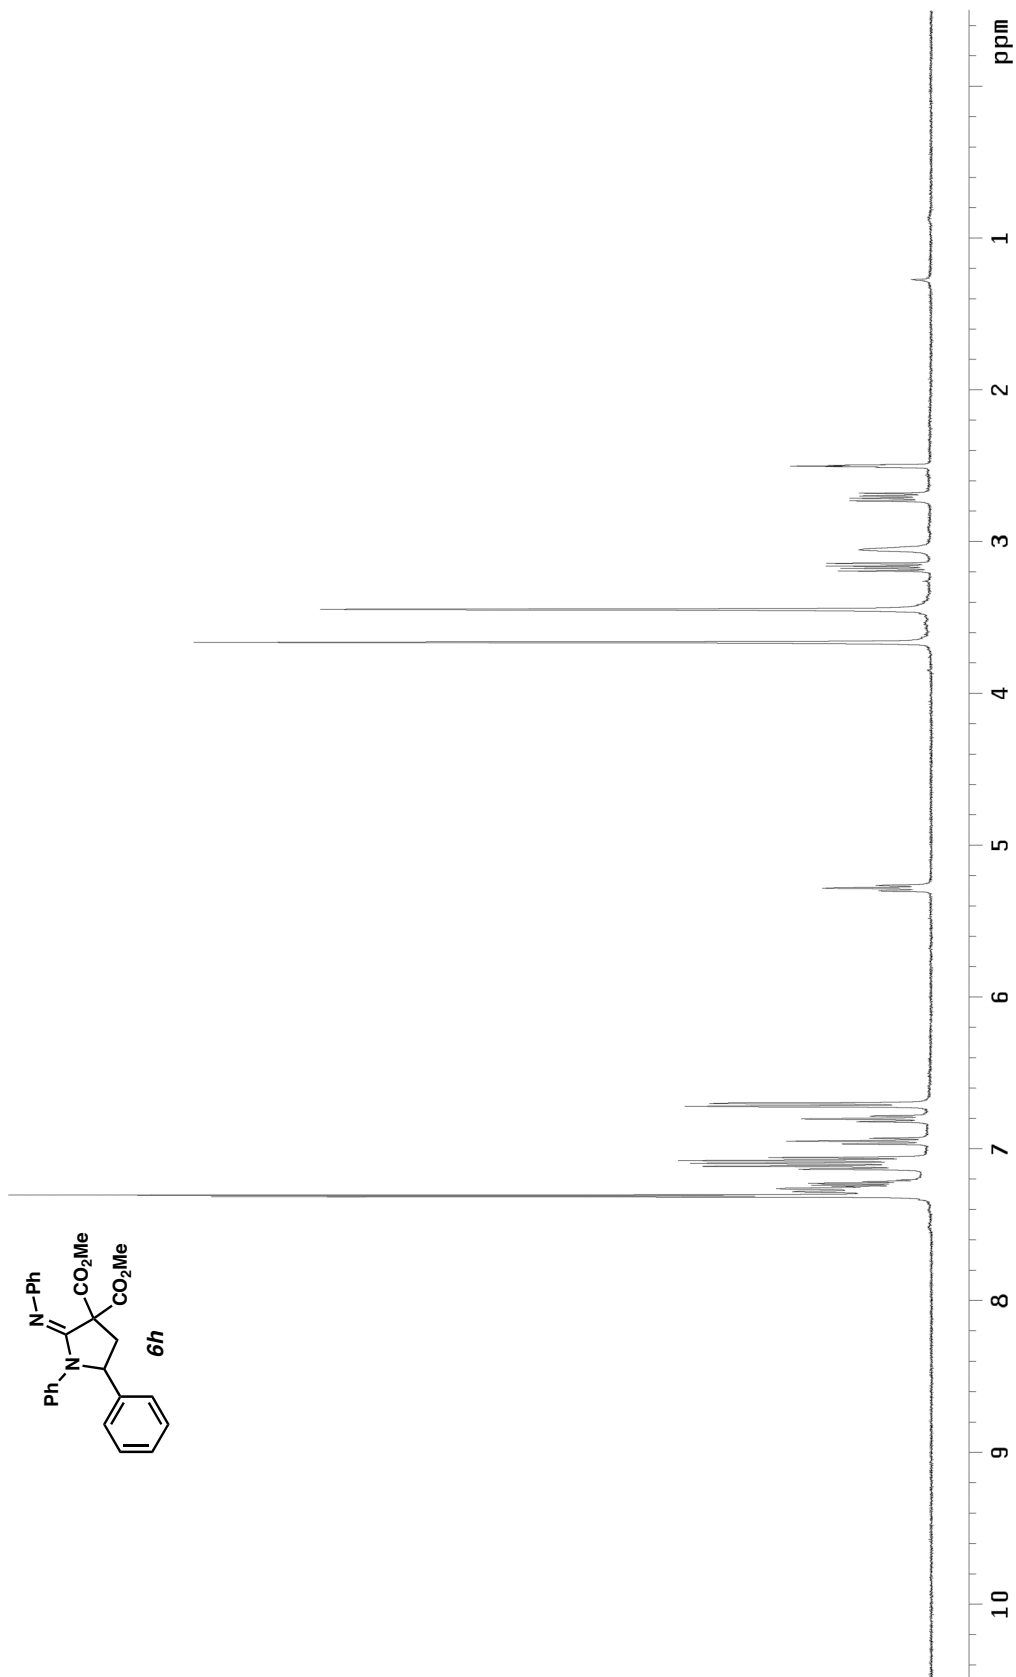 $^1\text{H}$  NMR (400 MHz,  $\text{DMSO-d}_6$ ,  $80\text{ }^\circ\text{C}$ ) of compound **6h**.



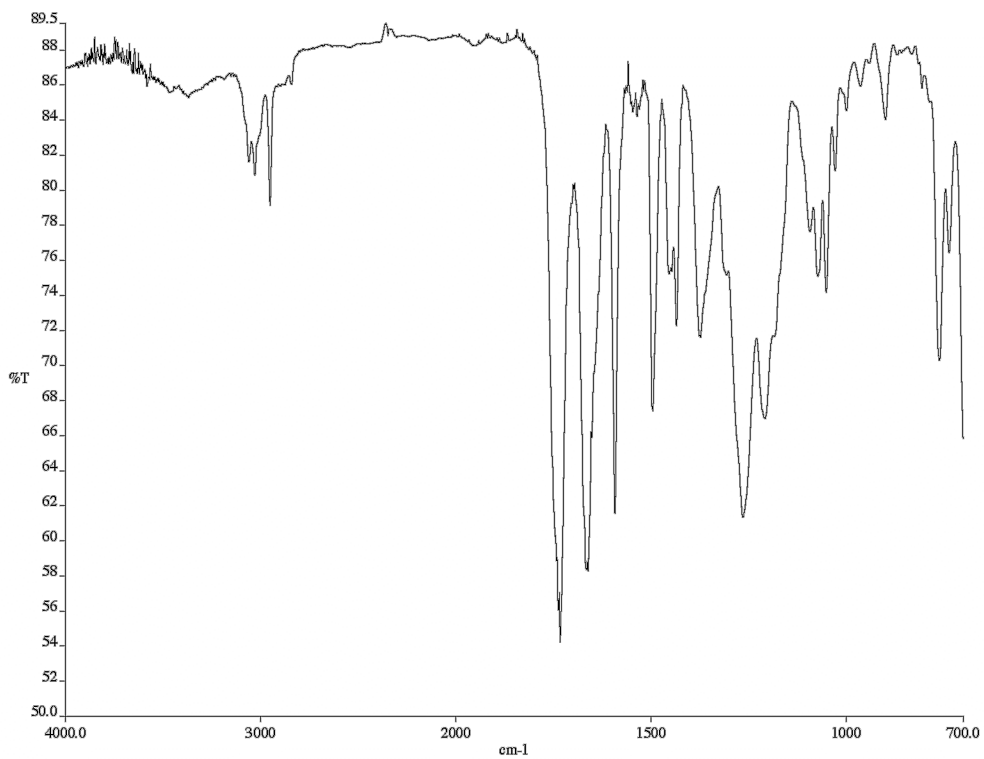Infrared spectrum (thin film/NaCl) of compound **6h**.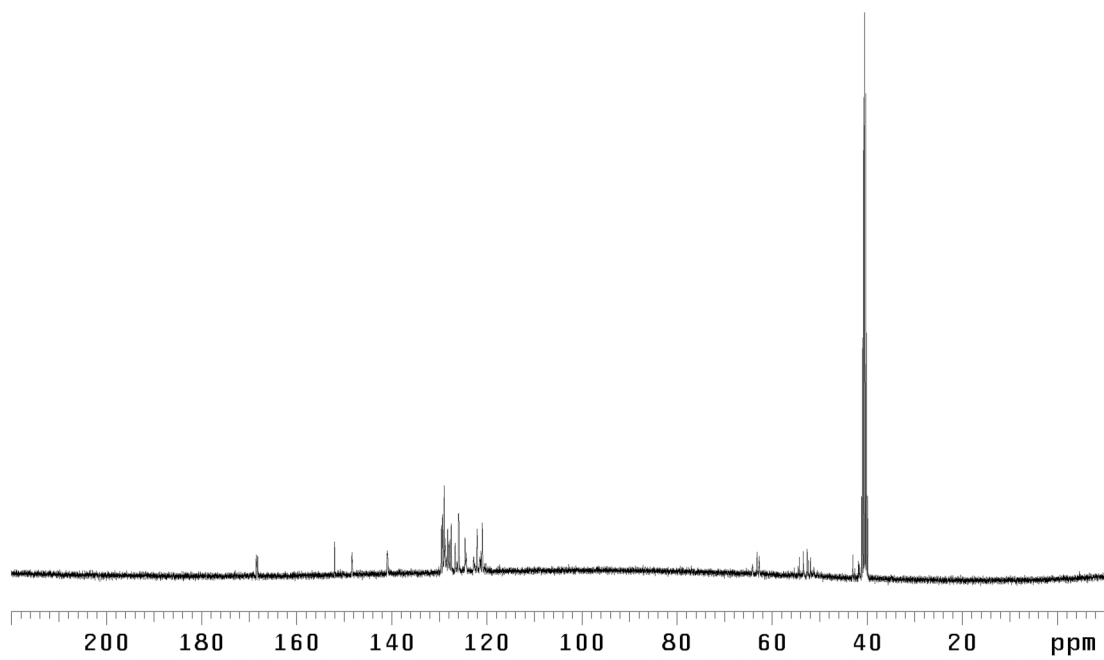<sup>13</sup>C NMR (101 MHz, DMSO-d<sub>6</sub>, 100 °C) of compound **6h**.

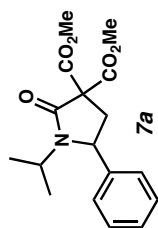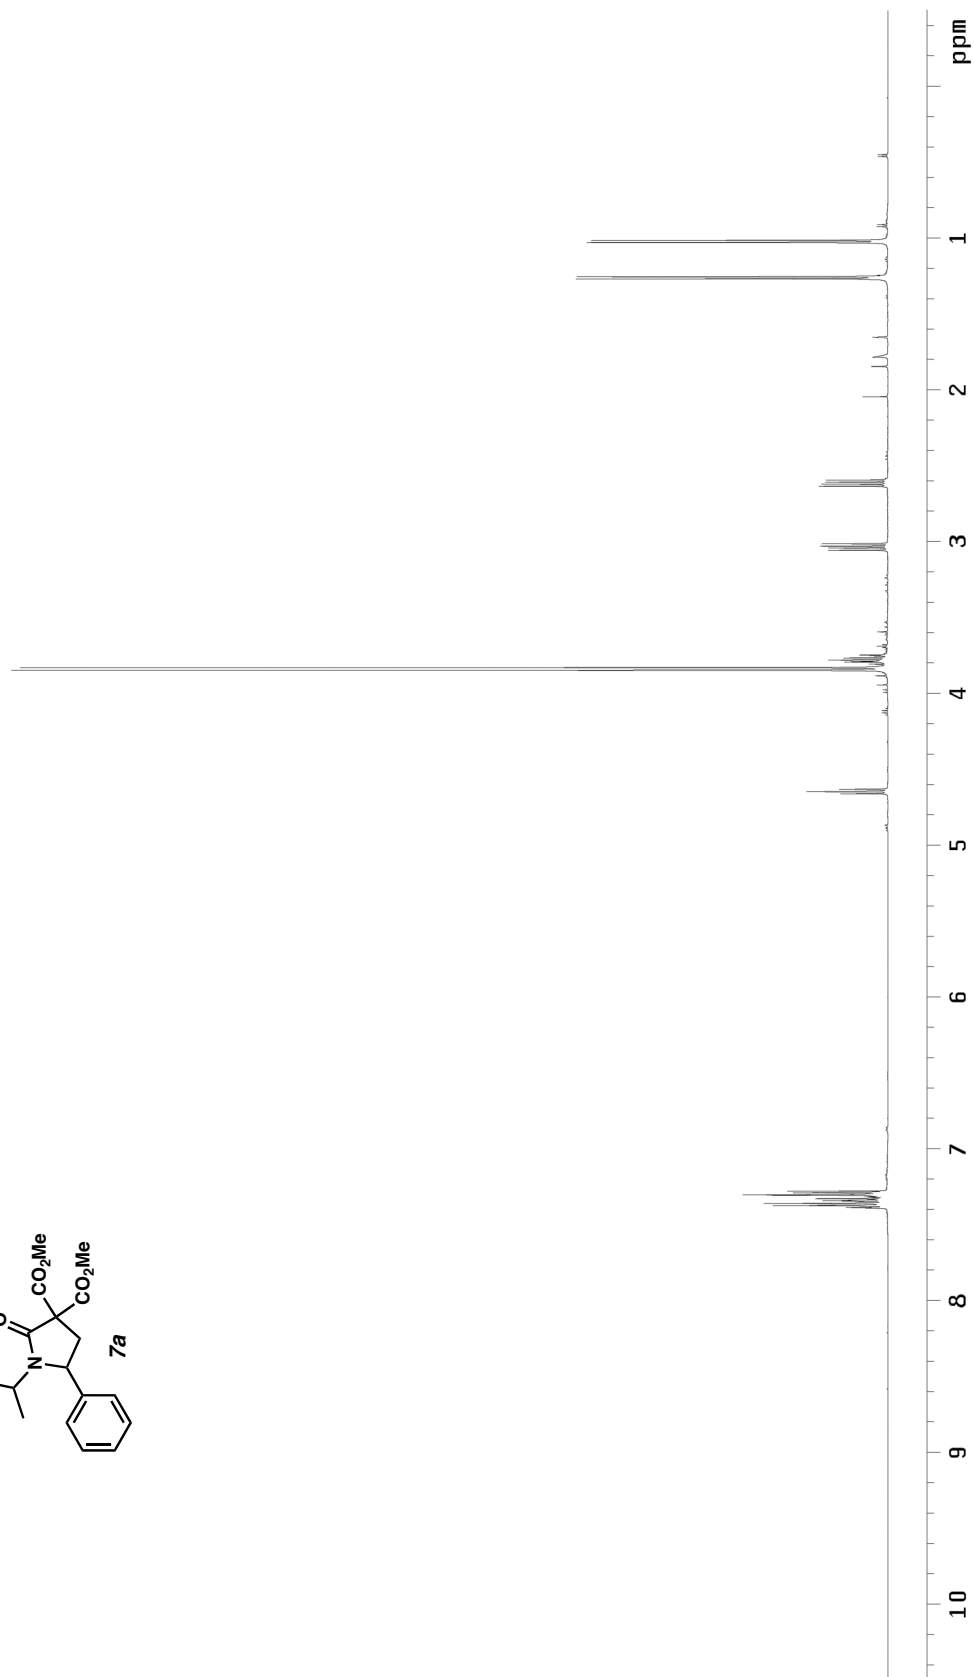

<sup>1</sup>H NMR (500 MHz, CDCl<sub>3</sub>) of compound **7a**.

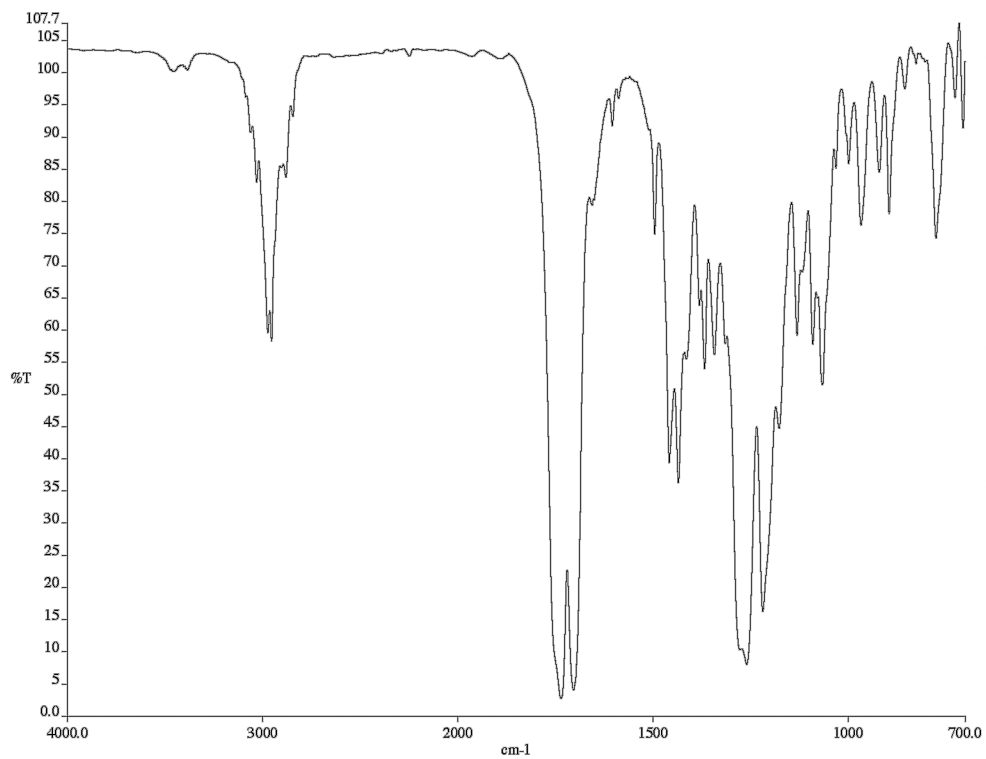Infrared spectrum (thin film/NaCl) of compound **7a**.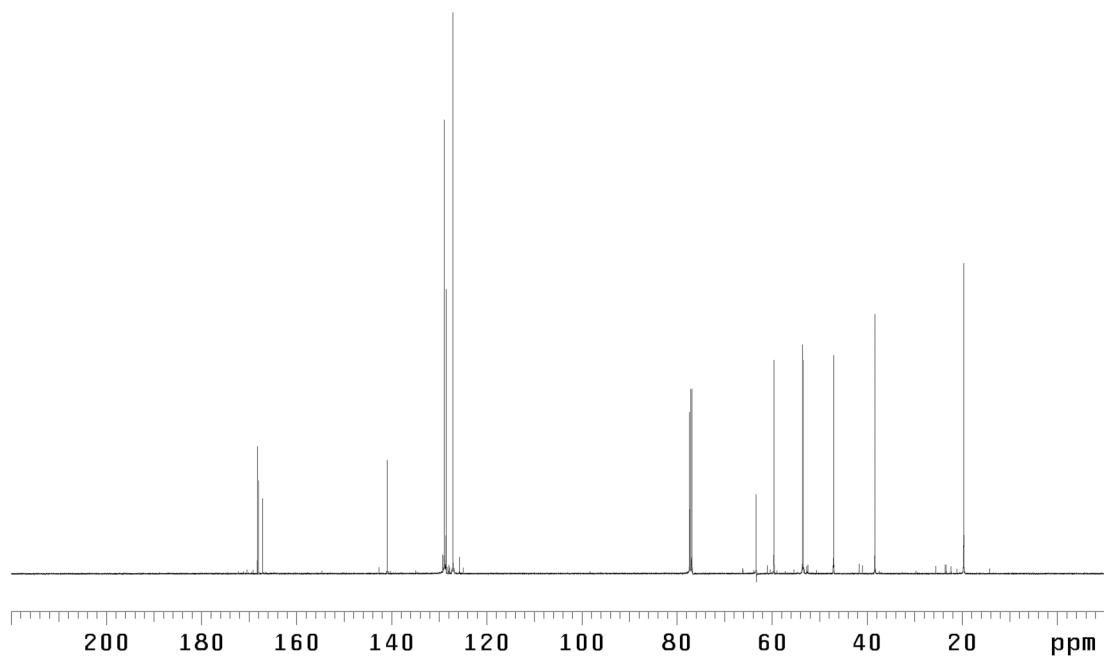<sup>13</sup>C NMR (126 MHz, CDCl<sub>3</sub>) of compound **7a**.

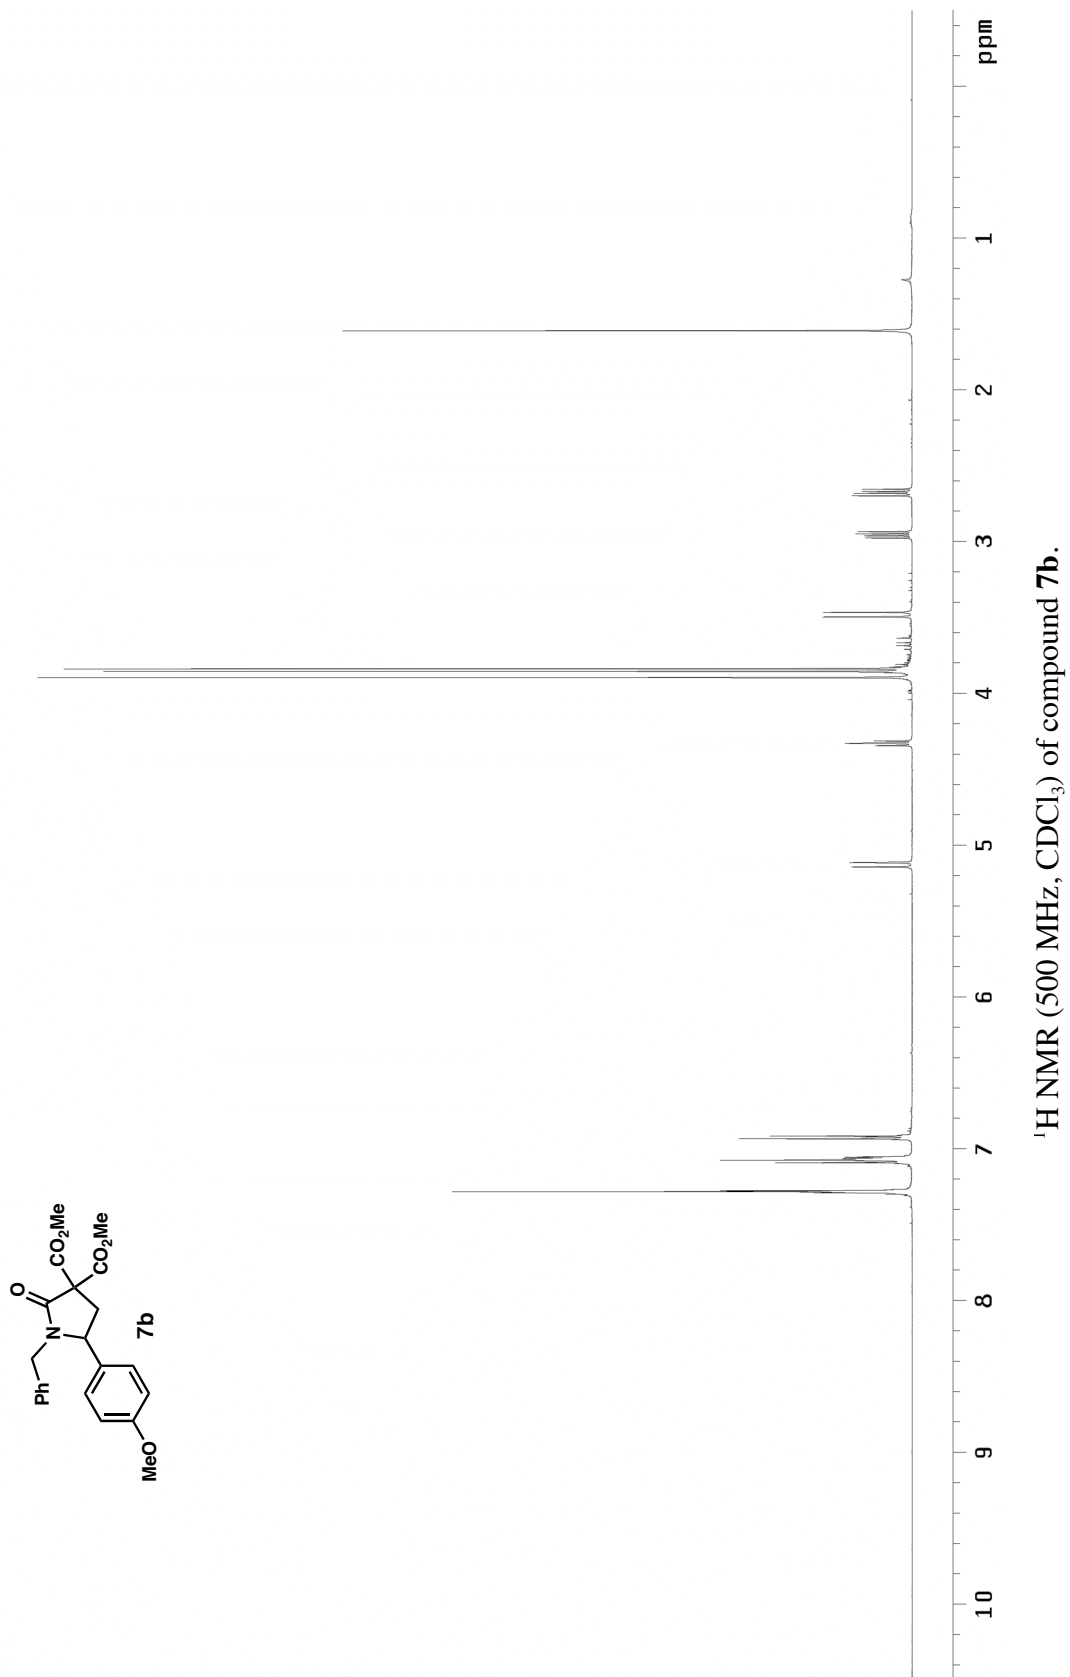

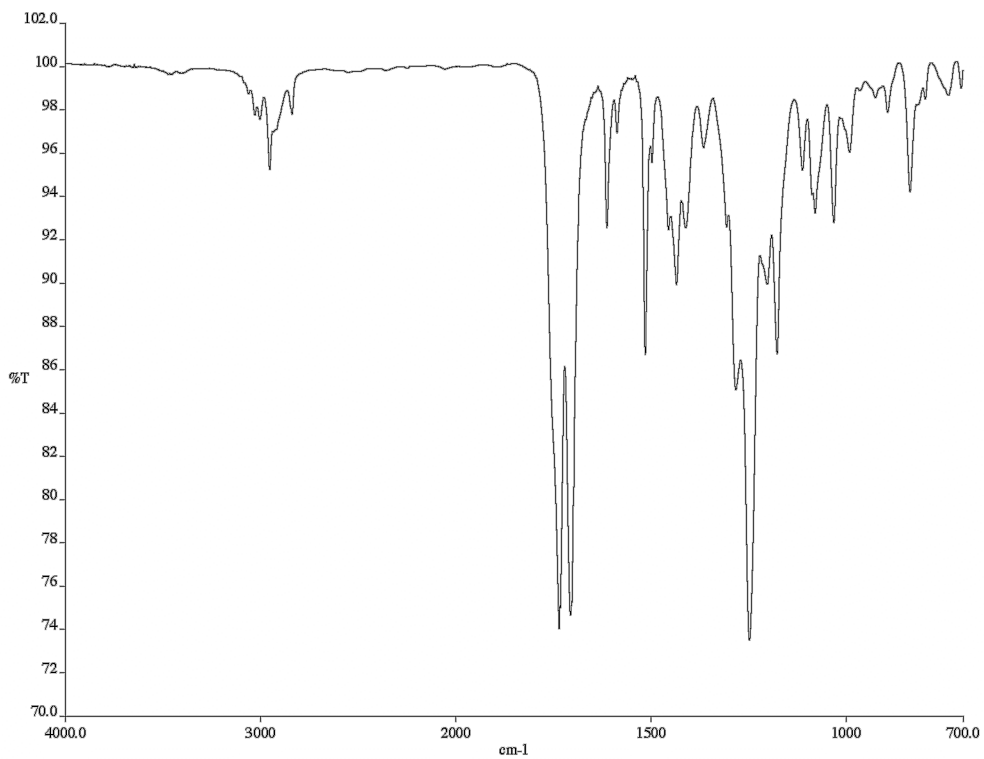Infrared spectrum (thin film/NaCl) of compound **7b**.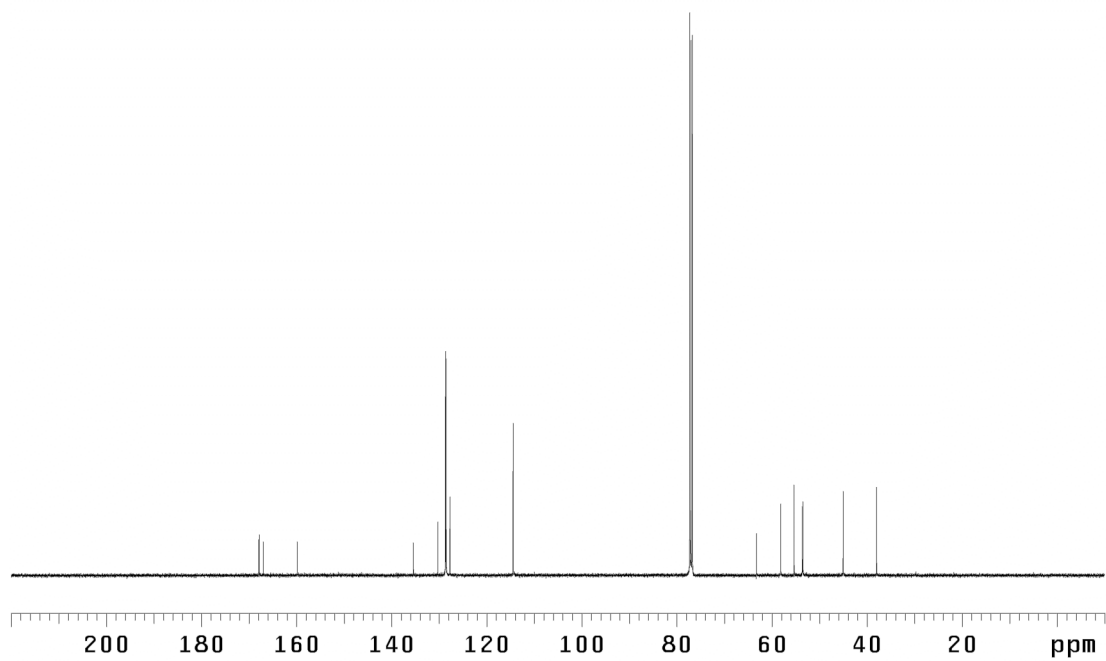 $^{13}\text{C}$  NMR (126 MHz,  $\text{CDCl}_3$ ) of compound **7b**.

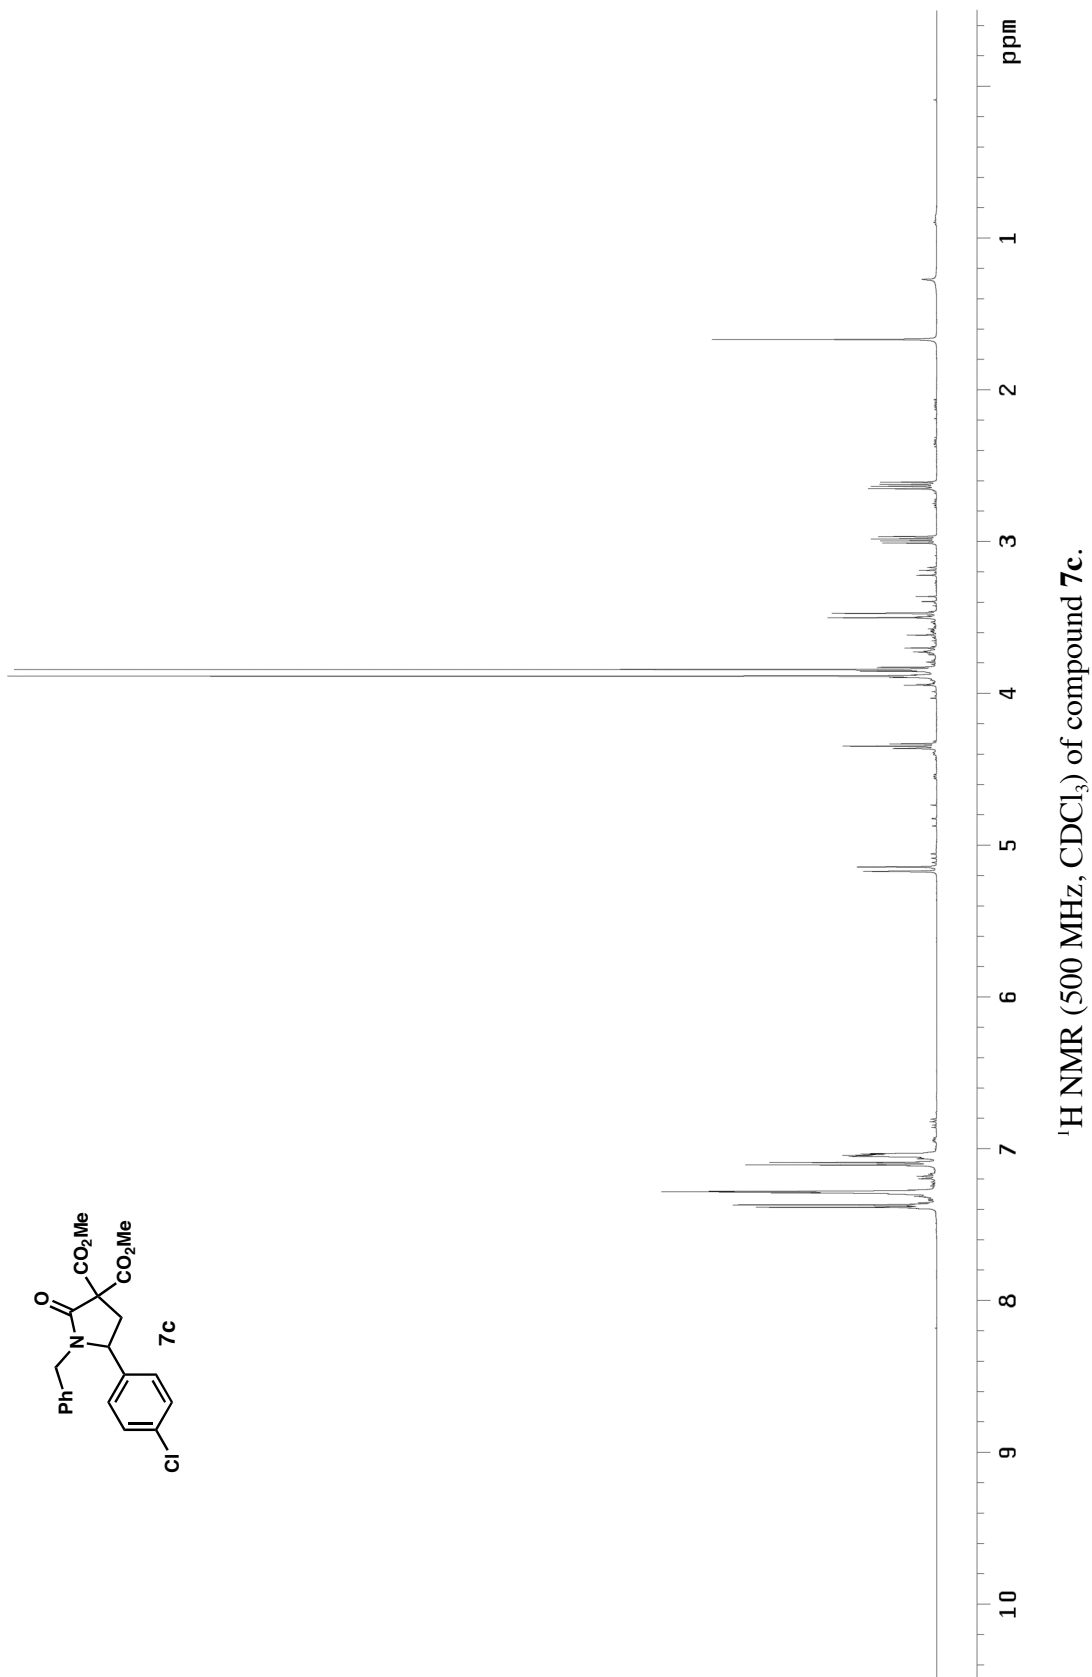

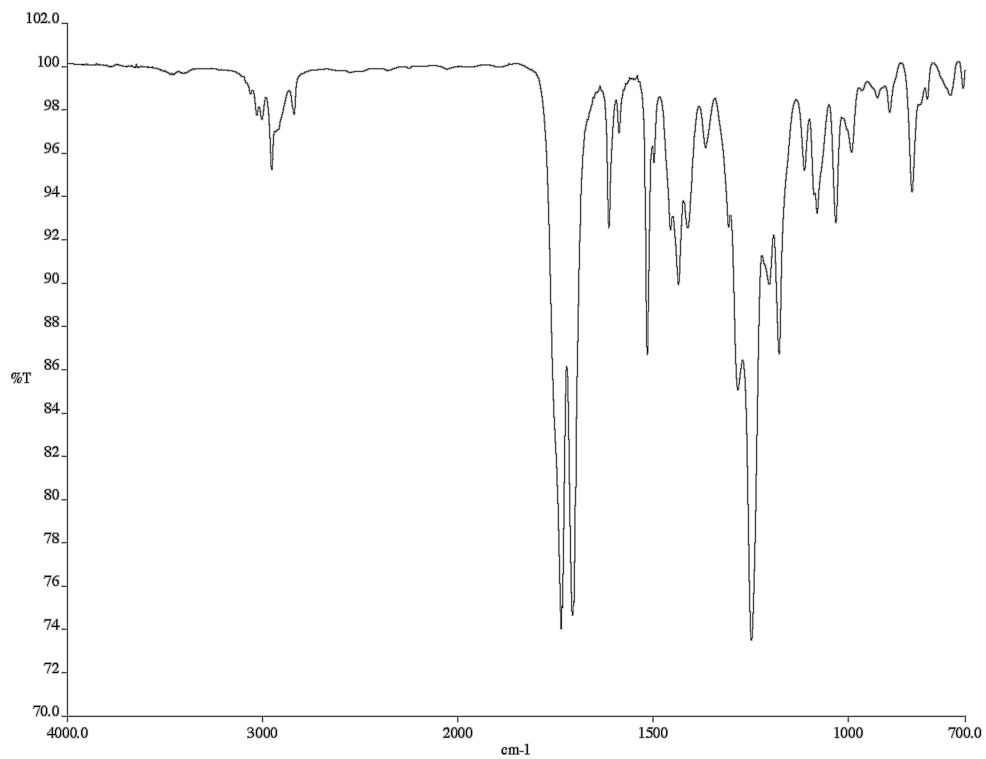Infrared spectrum (thin film/NaCl) of compound **7c**.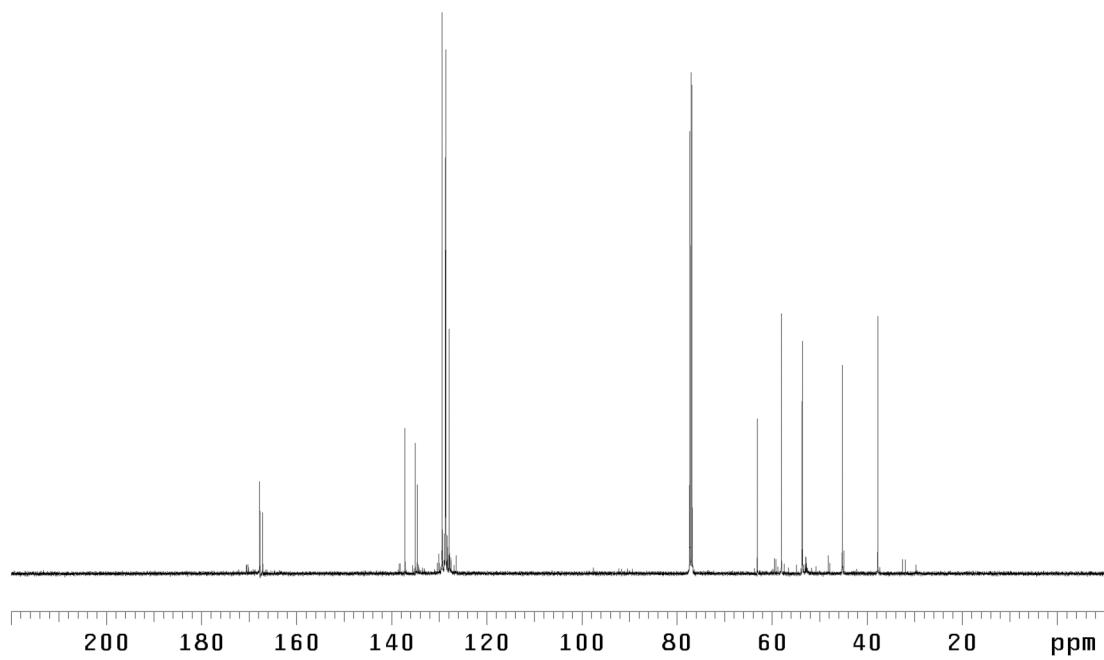<sup>13</sup>C NMR (126 MHz, CDCl<sub>3</sub>) of compound **7c**.

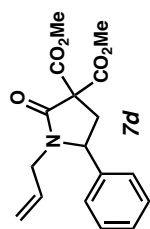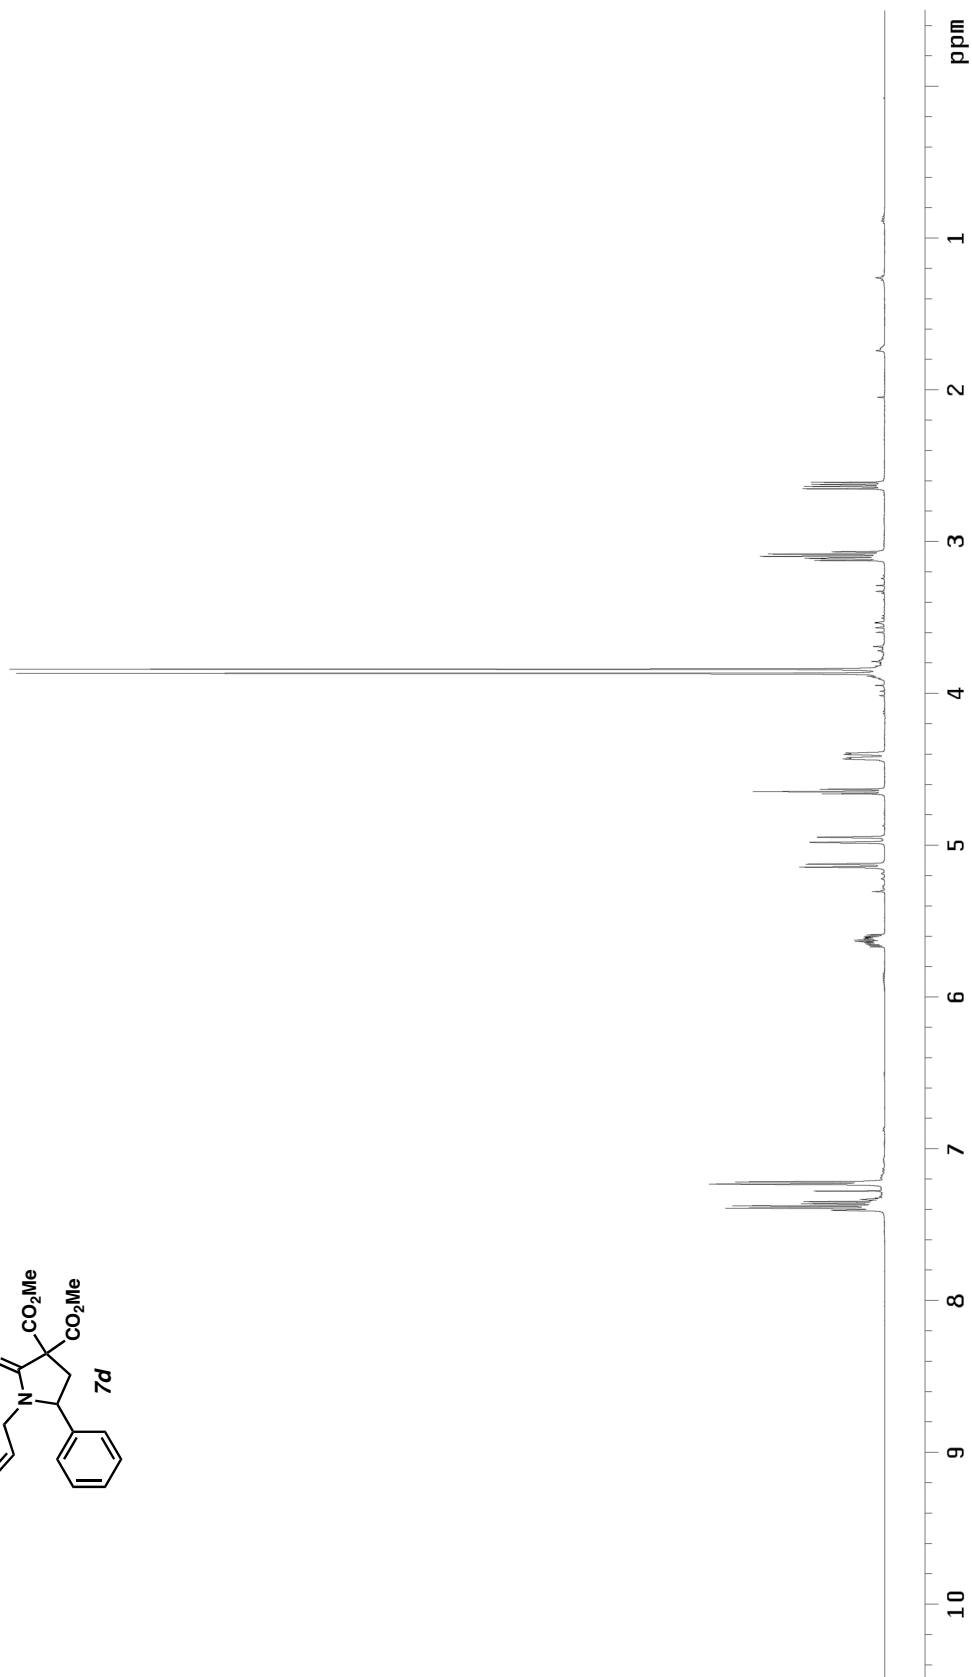

$^1\text{H}$  NMR (500 MHz,  $\text{CDCl}_3$ ) of compound **7d**.



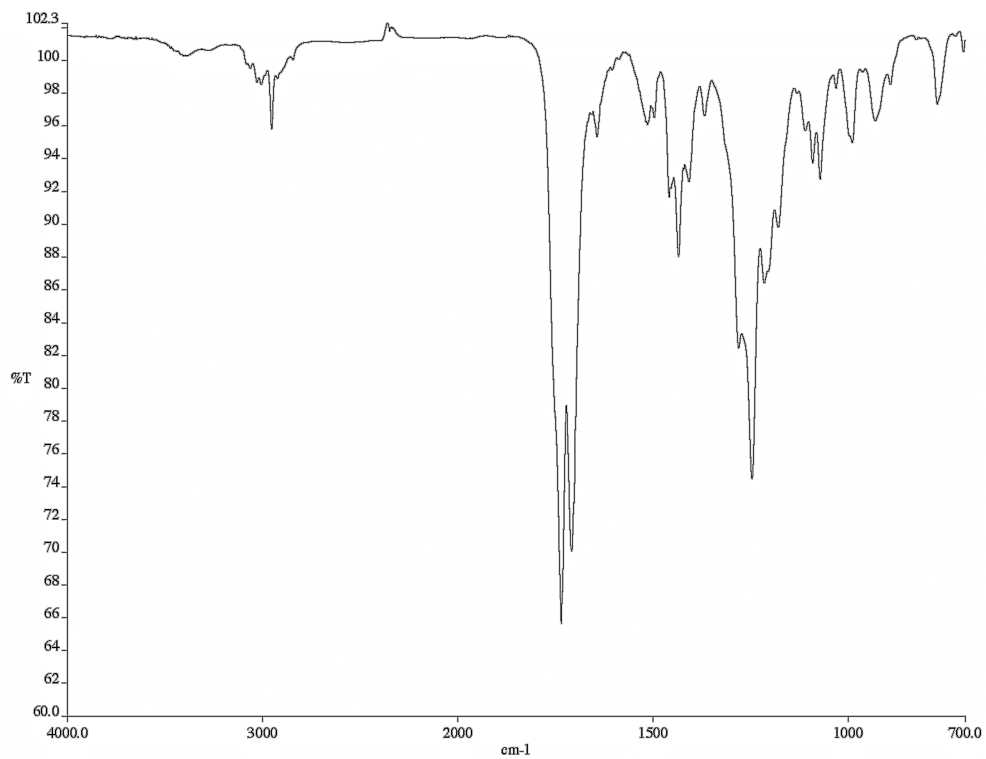Infrared spectrum (thin film/NaCl) of compound **7d**.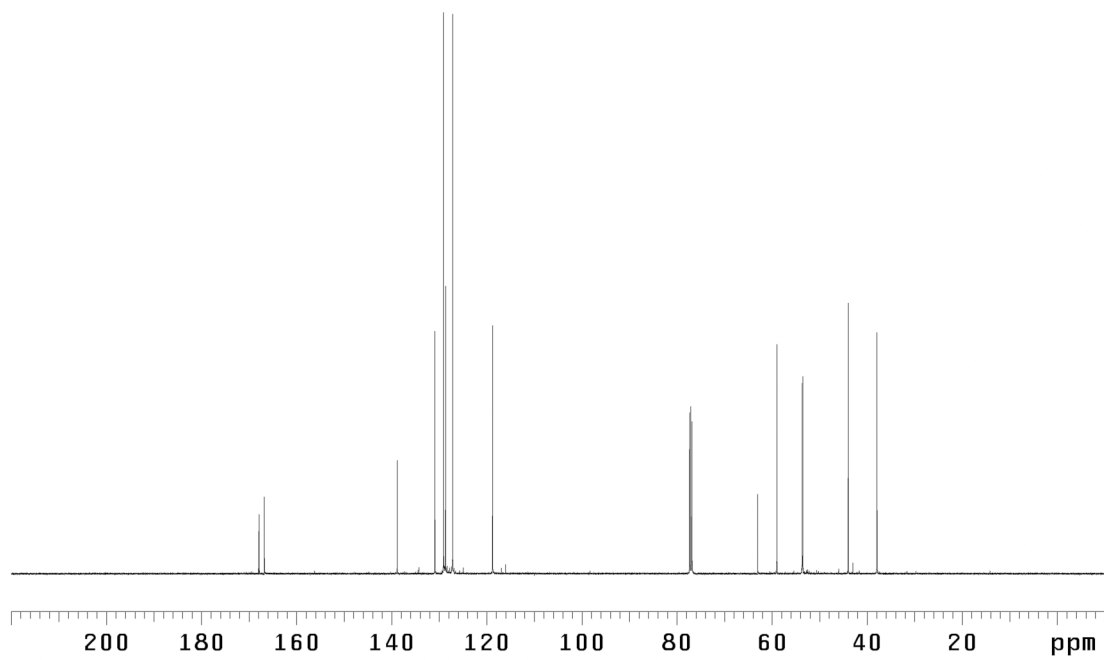<sup>13</sup>C NMR (126 MHz, CDCl<sub>3</sub>) of compound **7d**.

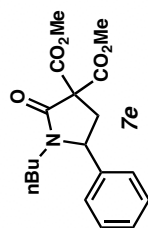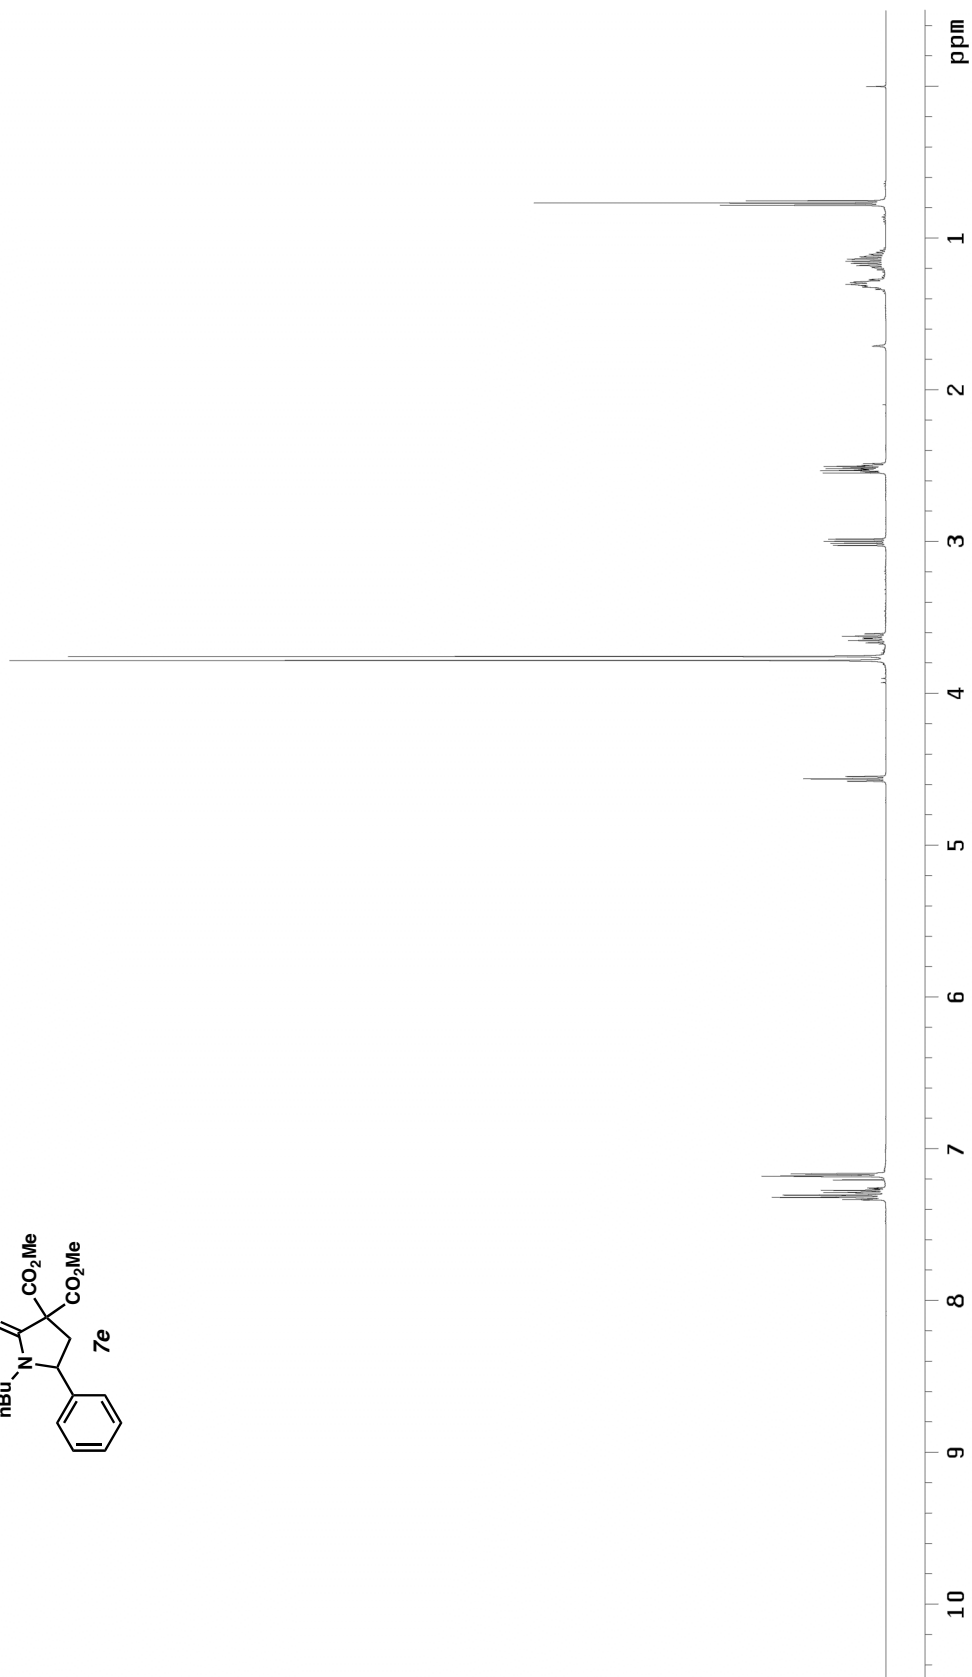

<sup>1</sup>H NMR (500 MHz, CDCl<sub>3</sub>) of compound **7e**.

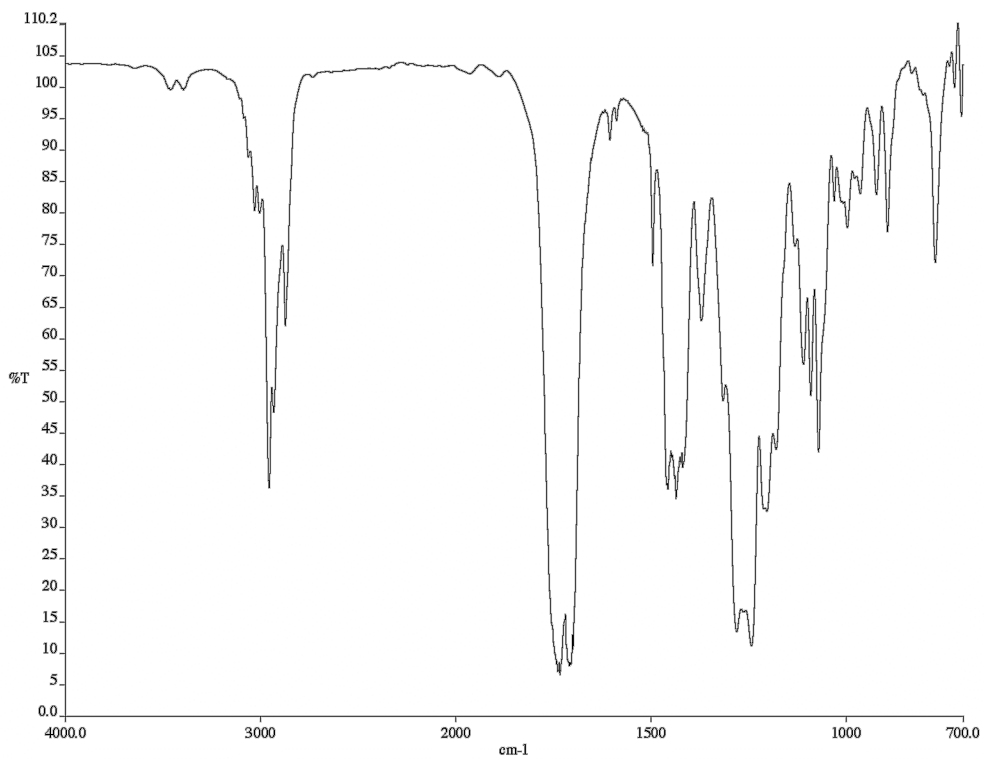Infrared spectrum (thin film/NaCl) of compound **7e**.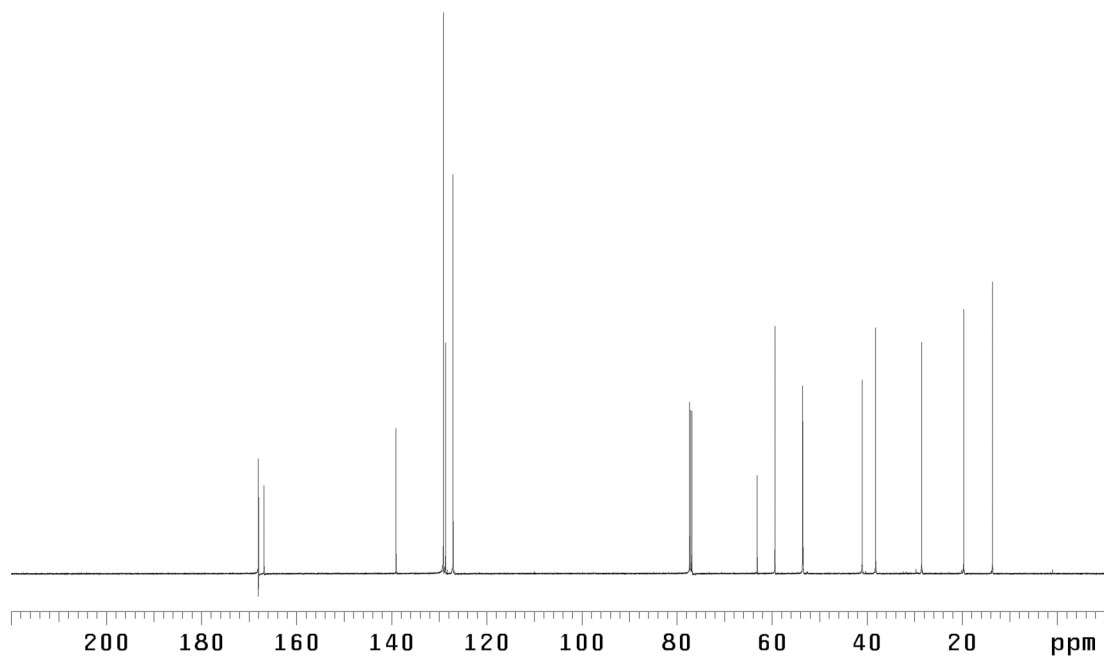<sup>13</sup>C NMR (126 MHz, CDCl<sub>3</sub>) of compound **7e**.

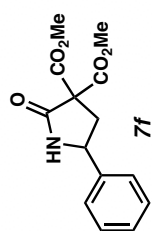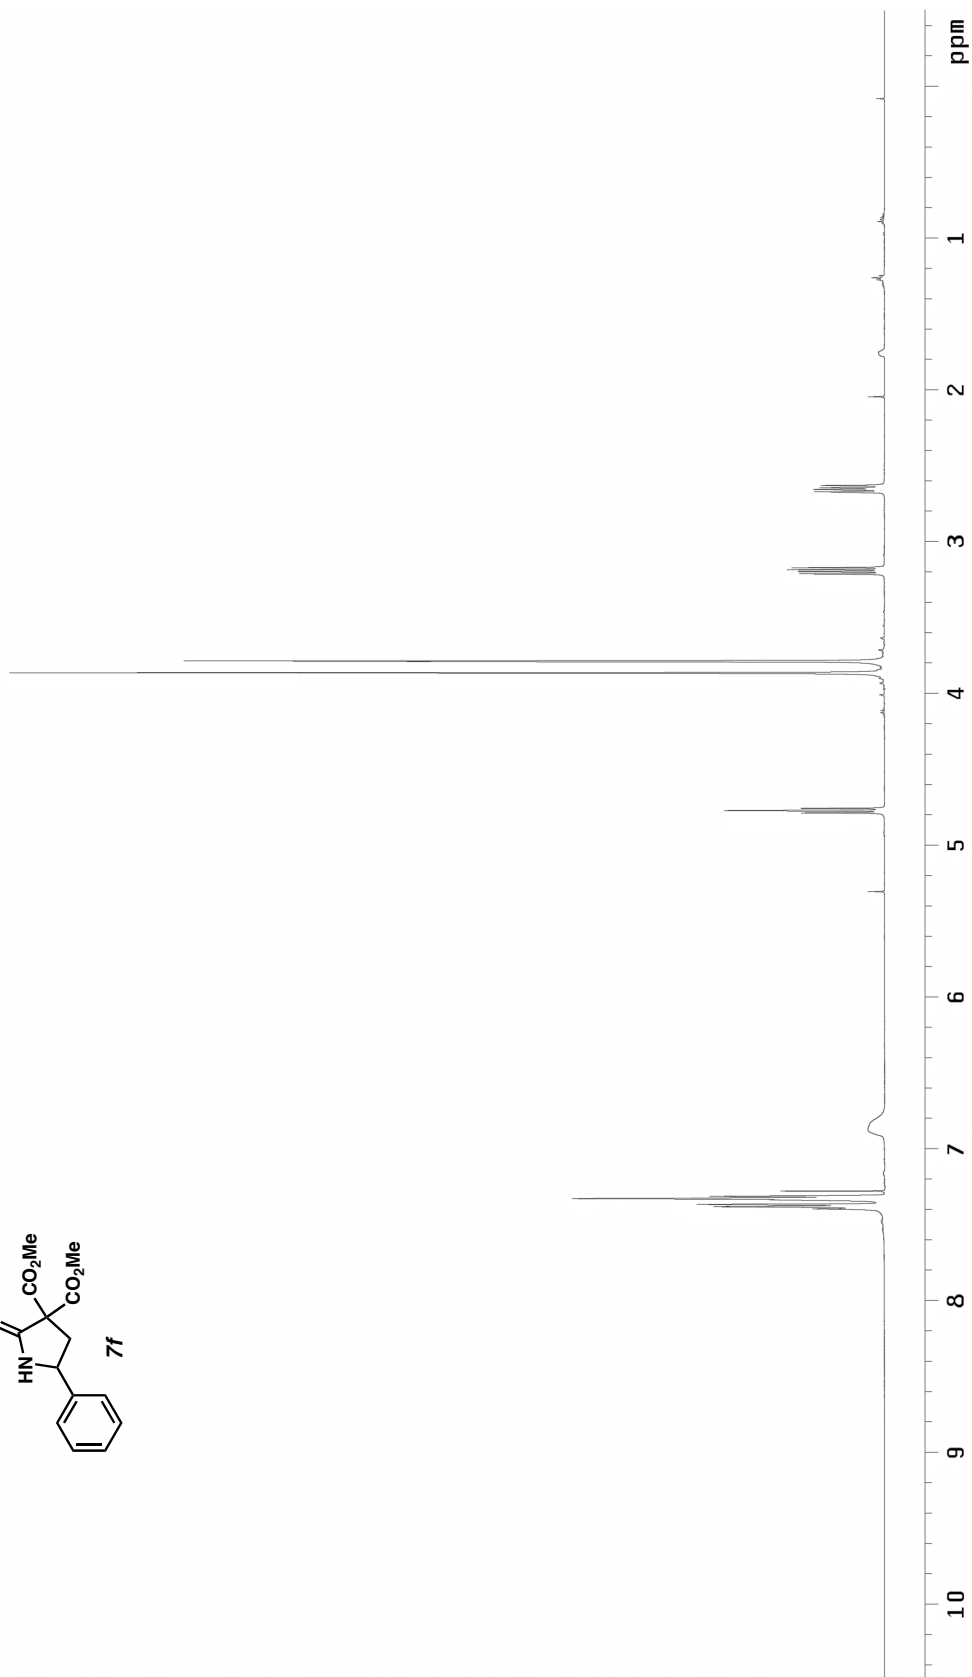

<sup>1</sup>H NMR (500 MHz, CDCl<sub>3</sub>) of compound **7f**.

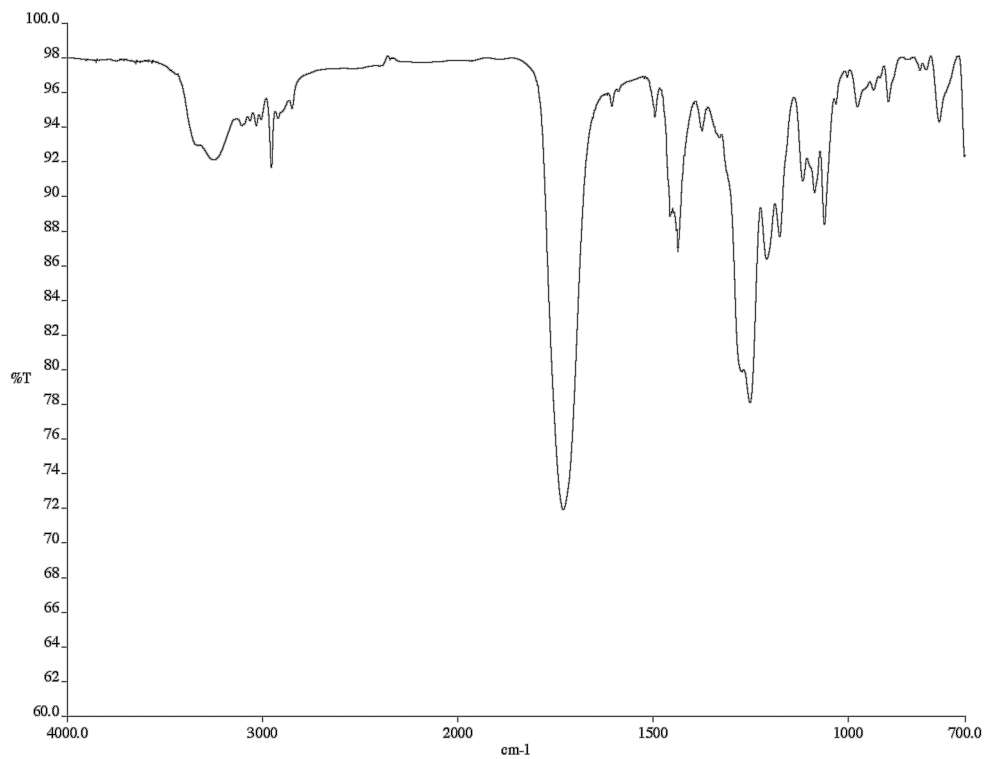Infrared spectrum (thin film/NaCl) of compound **7f**.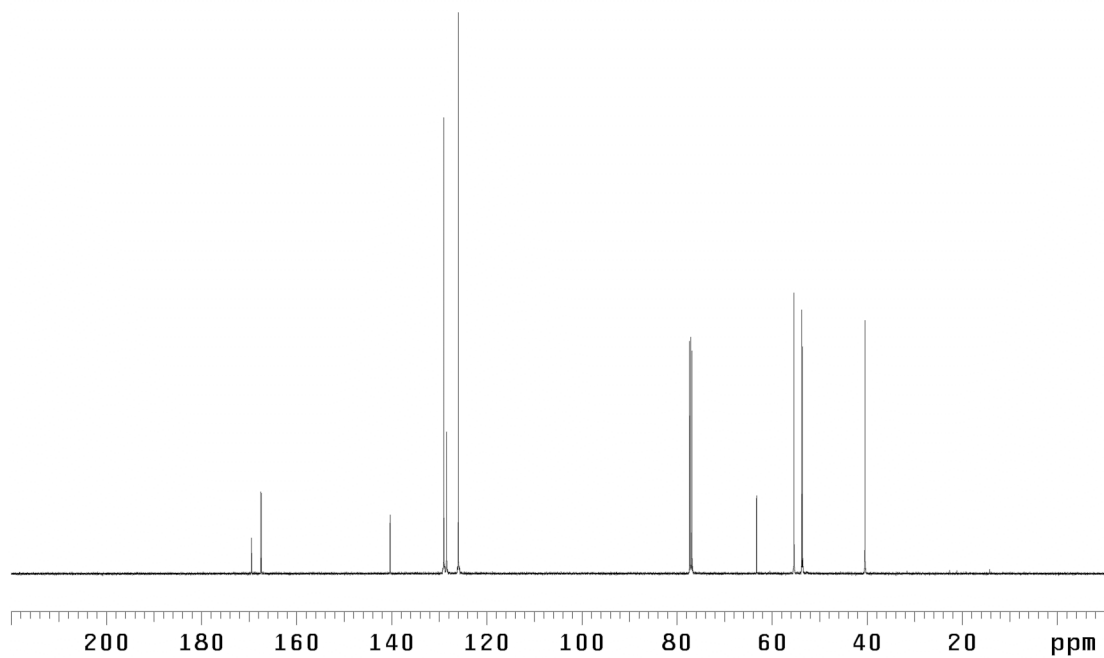<sup>13</sup>C NMR (126 MHz, CDCl<sub>3</sub>) of compound **7f**.

**Table 1. Crystal Data and Structure Analysis Details for 2h.**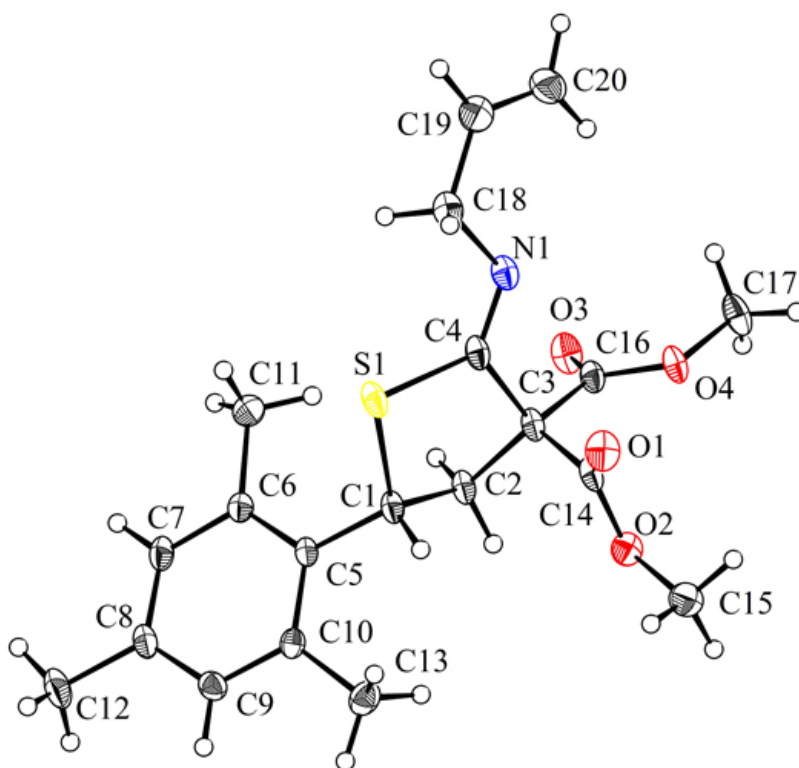

|                         |                                                    |
|-------------------------|----------------------------------------------------|
| Empirical formula       | C <sub>20</sub> H <sub>25</sub> N O <sub>4</sub> S |
| Formula weight          | 375.47                                             |
| Crystallization solvent | Benzene/Heptane/Ethyl Acetate                      |
| Crystal shape           | ?                                                  |
| Crystal color           | colourless                                         |
| Crystal size            | 0.08 x 0.19 x 0.46 mm                              |

#### Data Collection

|                                                                |                                                  |
|----------------------------------------------------------------|--------------------------------------------------|
| Preliminary photograph(s)                                      | rotation                                         |
| Type of diffractometer                                         | Bruker KAPPA APEX II                             |
| Wavelength                                                     | 0.71073 $\approx$ MO K                           |
| Data collection temperature                                    | 100.15 K                                         |
| Theta range for 5787 reflections used in lattice determination | 2.521 to 31.600 $^\circ$                         |
| Unit cell dimensions                                           | a = 14.5982(10) $\approx$ $\alpha$ = 90 $^\circ$ |

|                                        |                                                          |                           |
|----------------------------------------|----------------------------------------------------------|---------------------------|
|                                        | $b = 16.1620(12) \approx$                                | $\beta = 92.145(4)^\circ$ |
|                                        | $c = 8.2014(6) \approx$                                  | $\gamma = 90^\circ$       |
| Volume                                 | $1933.7(2) \approx^3$                                    |                           |
| Z                                      | 4                                                        |                           |
| Crystal system                         | monoclinic                                               |                           |
| Space group                            | P 1 21/c 1 (# 14)                                        |                           |
| Density (calculated)                   | 1.290 g/cm <sup>3</sup>                                  |                           |
| F(000)                                 | 800                                                      |                           |
| Theta range for data collection        | 1.4 to 37.4 $^\circ$                                     |                           |
| Completeness to theta = 25.00 $^\circ$ | 100.0%                                                   |                           |
| Index ranges                           | $-24 \leq h \leq 24, 0 \leq k \leq 27, 0 \leq l \leq 13$ |                           |
| Data collection scan type              | narrow and scans                                         |                           |
| Reflections collected                  | 15085                                                    |                           |
| Independent reflections                | 15085 [ $R_{int} = 0.0000$ ]                             |                           |
| Reflections > 2 $\sigma(I)$            | 10418                                                    |                           |
| Average $\sigma(I)/(\text{net } I)$    | 0.0676                                                   |                           |
| Absorption coefficient                 | 0.19 mm <sup>-1</sup>                                    |                           |
| Absorption correction                  | Semi-empirical from equivalents                          |                           |
| Max. and min. transmission             | 0.9848 and 0.9170                                        |                           |
| Reflections monitored for decay        | 0                                                        |                           |
| Decay of standards                     | 0%                                                       |                           |

### Structure Solution and Refinement

|                                                         |                                             |
|---------------------------------------------------------|---------------------------------------------|
| Primary solution method                                 | direct                                      |
| Secondary solution method                               | difmap                                      |
| Hydrogen placement                                      | geom                                        |
| Refinement method                                       | Full-matrix least-squares on F <sup>2</sup> |
| Data / restraints / parameters                          | 15085 / 0 / 241                             |
| Treatment of hydrogen atoms                             | constr                                      |
| Goodness-of-fit on F <sup>2</sup>                       | 1.06                                        |
| Final R indices [ $I > 2\sigma(I)$ , 10418 reflections] | $R1 = 0.0592, wR2 = 0.1221$                 |
| R indices (all data)                                    | $R1 = 0.1034, wR2 = 0.1431$                 |
| Type of weighting scheme used                           | calc                                        |
| Weighting scheme used                                   | calc                                        |
| $w = 1/[\sigma^2(F_o^2) + (0.0645P)^2 + 0.3700P]$       | where $P = (F_o^2 + 2F_c^2)/3$              |
| Max shift/error                                         | 0.001                                       |
| Average shift/error                                     | 0.000                                       |

Largest diff. peak and hole 0.49 and -0.37 e $\Sigma$ <sup>≈3</sup>

### Programs Used

|                      |                                   |
|----------------------|-----------------------------------|
| Cell refinement      | SAINT V8.18C (Bruker-AXS, 2007)   |
| Data collection      | APEX2 2012.2-0 (Bruker-AXS, 2007) |
| Data reduction       | SAINT V8.18C (Bruker-AXS, 2007)   |
| Structure solution   | SHELXS-97 (Sheldrick, 1990)       |
| Structure refinement | SHELXL-97 (Sheldrick, 1997)       |
| Graphics             | DIAMOND 3 (Crystal Impact, 1999)  |



**Table 2. Atomic coordinates ( $\times 10^4$ ) and equivalent isotropic displacement parameters ( $\approx^2 \times 10^3$ ) for rac13.  $U(\text{eq})$  is defined as one third of the trace of the orthogonalized  $U_{ij}$  tensor.**

|       | x        | y       | z       | $U_{\text{eq}}$ |
|-------|----------|---------|---------|-----------------|
| S(1)  | 7001(1)  | 6892(1) | 2895(1) | 22(1)           |
| O(1)  | 8360(1)  | 6282(1) | 6404(1) | 27(1)           |
| O(2)  | 7480(1)  | 5212(1) | 7100(1) | 22(1)           |
| O(3)  | 7866(1)  | 4219(1) | 2706(1) | 26(1)           |
| O(4)  | 8857(1)  | 4560(1) | 4768(1) | 22(1)           |
| N(1)  | 8660(1)  | 6157(1) | 2476(1) | 20(1)           |
| C(1)  | 6183(1)  | 6259(1) | 4018(2) | 18(1)           |
| C(2)  | 6567(1)  | 5375(1) | 4014(2) | 18(1)           |
| C(3)  | 7607(1)  | 5456(1) | 4275(2) | 17(1)           |
| C(4)  | 7894(1)  | 6152(1) | 3131(2) | 18(1)           |
| C(5)  | 5192(1)  | 6358(1) | 3430(1) | 15(1)           |
| C(6)  | 4890(1)  | 6274(1) | 1789(1) | 18(1)           |
| C(7)  | 3969(1)  | 6418(1) | 1363(2) | 20(1)           |
| C(8)  | 3336(1)  | 6643(1) | 2493(2) | 20(1)           |
| C(9)  | 3634(1)  | 6687(1) | 4121(2) | 19(1)           |
| C(10) | 4541(1)  | 6543(1) | 4608(1) | 17(1)           |
| C(11) | 5514(1)  | 6056(1) | 420(2)  | 26(1)           |
| C(12) | 2354(1)  | 6831(1) | 1995(2) | 29(1)           |
| C(13) | 4795(1)  | 6554(1) | 6414(1) | 24(1)           |
| C(14) | 7874(1)  | 5710(1) | 6034(2) | 18(1)           |
| C(15) | 7719(1)  | 5383(1) | 8800(2) | 26(1)           |
| C(16) | 8111(1)  | 4667(1) | 3805(2) | 18(1)           |
| C(17) | 9433(1)  | 3862(1) | 4390(2) | 29(1)           |
| C(18) | 8876(1)  | 6851(1) | 1424(2) | 23(1)           |
| C(19) | 9690(1)  | 6694(1) | 428(2)  | 27(1)           |
| C(20) | 10218(1) | 6036(1) | 521(2)  | 31(1)           |

**Table 3. Bond lengths [ $\approx$ ] and angles [ $\infty$ ] for rac13.**

---

|              |            |
|--------------|------------|
| S(1)-C(1)    | 1.8457(13) |
| S(1)-C(4)    | 1.7750(12) |
| O(1)-C(14)   | 1.1975(14) |
| O(2)-C(14)   | 1.3343(15) |
| O(2)-C(15)   | 1.4511(15) |
| O(3)-C(16)   | 1.1997(14) |
| O(4)-C(16)   | 1.3320(15) |
| O(4)-C(17)   | 1.4486(16) |
| N(1)-C(4)    | 1.2587(17) |
| N(1)-C(18)   | 1.4571(16) |
| C(1)-H(1)    | 1.0000     |
| C(1)-C(2)    | 1.5343(16) |
| C(1)-C(5)    | 1.5167(17) |
| C(2)-H(2A)   | 0.9900     |
| C(2)-H(2B)   | 0.9900     |
| C(2)-C(3)    | 1.5308(17) |
| C(3)-C(4)    | 1.5333(17) |
| C(3)-C(14)   | 1.5361(17) |
| C(3)-C(16)   | 1.5297(16) |
| C(5)-C(6)    | 1.4066(16) |
| C(5)-C(10)   | 1.4121(18) |
| C(6)-C(7)    | 1.3959(18) |
| C(6)-C(11)   | 1.5136(19) |
| C(7)-H(7)    | 0.9500     |
| C(7)-C(8)    | 1.3812(19) |
| C(8)-C(9)    | 1.3904(17) |
| C(8)-C(12)   | 1.5075(18) |
| C(9)-H(9)    | 0.9500     |
| C(9)-C(10)   | 1.3892(17) |
| C(10)-C(13)  | 1.5126(16) |
| C(11)-H(11A) | 0.9800     |
| C(11)-H(11B) | 0.9800     |
| C(11)-H(11C) | 0.9800     |
| C(12)-H(12A) | 0.9800     |
| C(12)-H(12B) | 0.9800     |
| C(12)-H(12C) | 0.9800     |
| C(13)-H(13A) | 0.9800     |
| C(13)-H(13B) | 0.9800     |
| C(13)-H(13C) | 0.9800     |
| C(15)-H(15A) | 0.9800     |
| C(15)-H(15B) | 0.9800     |

|                  |            |
|------------------|------------|
| C(15)-H(15C)     | 0.9800     |
| C(17)-H(17A)     | 0.9800     |
| C(17)-H(17B)     | 0.9800     |
| C(17)-H(17C)     | 0.9800     |
| C(18)-H(18A)     | 0.9900     |
| C(18)-H(18B)     | 0.9900     |
| C(18)-C(19)      | 1.489(2)   |
| C(19)-H(19)      | 0.9500     |
| C(19)-C(20)      | 1.313(2)   |
| C(20)-H(20A)     | 0.9500     |
| C(20)-H(20B)     | 0.9500     |
|                  |            |
| C(4)-S(1)-C(1)   | 93.31(6)   |
| C(14)-O(2)-C(15) | 114.91(10) |
| C(16)-O(4)-C(17) | 116.24(10) |
| C(4)-N(1)-C(18)  | 118.20(11) |
| S(1)-C(1)-H(1)   | 106.7      |
| C(2)-C(1)-S(1)   | 105.80(9)  |
| C(2)-C(1)-H(1)   | 106.7      |
| C(5)-C(1)-S(1)   | 114.20(8)  |
| C(5)-C(1)-H(1)   | 106.7      |
| C(5)-C(1)-C(2)   | 116.22(10) |
| C(1)-C(2)-H(2A)  | 110.5      |
| C(1)-C(2)-H(2B)  | 110.5      |
| H(2A)-C(2)-H(2B) | 108.7      |
| C(3)-C(2)-C(1)   | 106.28(9)  |
| C(3)-C(2)-H(2A)  | 110.5      |
| C(3)-C(2)-H(2B)  | 110.5      |
| C(2)-C(3)-C(4)   | 105.66(9)  |
| C(2)-C(3)-C(14)  | 111.69(10) |
| C(4)-C(3)-C(14)  | 108.25(9)  |
| C(16)-C(3)-C(2)  | 112.20(10) |
| C(16)-C(3)-C(4)  | 108.18(10) |
| C(16)-C(3)-C(14) | 110.60(9)  |
| N(1)-C(4)-S(1)   | 127.60(9)  |
| N(1)-C(4)-C(3)   | 122.25(10) |
| C(3)-C(4)-S(1)   | 110.15(9)  |
| C(6)-C(5)-C(1)   | 123.69(11) |
| C(6)-C(5)-C(10)  | 118.76(11) |
| C(10)-C(5)-C(1)  | 117.55(10) |
| C(5)-C(6)-C(11)  | 123.86(11) |
| C(7)-C(6)-C(5)   | 119.14(11) |
| C(7)-C(6)-C(11)  | 116.99(11) |

|                     |            |
|---------------------|------------|
| C(6)-C(7)-H(7)      | 118.7      |
| C(8)-C(7)-C(6)      | 122.59(11) |
| C(8)-C(7)-H(7)      | 118.7      |
| C(7)-C(8)-C(9)      | 117.69(11) |
| C(7)-C(8)-C(12)     | 121.68(12) |
| C(9)-C(8)-C(12)     | 120.63(12) |
| C(8)-C(9)-H(9)      | 119.1      |
| C(10)-C(9)-C(8)     | 121.88(11) |
| C(10)-C(9)-H(9)     | 119.1      |
| C(5)-C(10)-C(13)    | 121.74(11) |
| C(9)-C(10)-C(5)     | 119.79(11) |
| C(9)-C(10)-C(13)    | 118.41(11) |
| C(6)-C(11)-H(11A)   | 109.5      |
| C(6)-C(11)-H(11B)   | 109.5      |
| C(6)-C(11)-H(11C)   | 109.5      |
| H(11A)-C(11)-H(11B) | 109.5      |
| H(11A)-C(11)-H(11C) | 109.5      |
| H(11B)-C(11)-H(11C) | 109.5      |
| C(8)-C(12)-H(12A)   | 109.5      |
| C(8)-C(12)-H(12B)   | 109.5      |
| C(8)-C(12)-H(12C)   | 109.5      |
| H(12A)-C(12)-H(12B) | 109.5      |
| H(12A)-C(12)-H(12C) | 109.5      |
| H(12B)-C(12)-H(12C) | 109.5      |
| C(10)-C(13)-H(13A)  | 109.5      |
| C(10)-C(13)-H(13B)  | 109.5      |
| C(10)-C(13)-H(13C)  | 109.5      |
| H(13A)-C(13)-H(13B) | 109.5      |
| H(13A)-C(13)-H(13C) | 109.5      |
| H(13B)-C(13)-H(13C) | 109.5      |
| O(1)-C(14)-O(2)     | 124.42(11) |
| O(1)-C(14)-C(3)     | 124.85(12) |
| O(2)-C(14)-C(3)     | 110.72(10) |
| O(2)-C(15)-H(15A)   | 109.5      |
| O(2)-C(15)-H(15B)   | 109.5      |
| O(2)-C(15)-H(15C)   | 109.5      |
| H(15A)-C(15)-H(15B) | 109.5      |
| H(15A)-C(15)-H(15C) | 109.5      |
| H(15B)-C(15)-H(15C) | 109.5      |
| O(3)-C(16)-O(4)     | 125.53(11) |
| O(3)-C(16)-C(3)     | 124.03(11) |
| O(4)-C(16)-C(3)     | 110.43(10) |
| O(4)-C(17)-H(17A)   | 109.5      |

|                     |            |
|---------------------|------------|
| O(4)-C(17)-H(17B)   | 109.5      |
| O(4)-C(17)-H(17C)   | 109.5      |
| H(17A)-C(17)-H(17B) | 109.5      |
| H(17A)-C(17)-H(17C) | 109.5      |
| H(17B)-C(17)-H(17C) | 109.5      |
| N(1)-C(18)-H(18A)   | 109.0      |
| N(1)-C(18)-H(18B)   | 109.0      |
| N(1)-C(18)-C(19)    | 112.84(11) |
| H(18A)-C(18)-H(18B) | 107.8      |
| C(19)-C(18)-H(18A)  | 109.0      |
| C(19)-C(18)-H(18B)  | 109.0      |
| C(18)-C(19)-H(19)   | 117.1      |
| C(20)-C(19)-C(18)   | 125.79(13) |
| C(20)-C(19)-H(19)   | 117.1      |
| C(19)-C(20)-H(20A)  | 120.0      |
| C(19)-C(20)-H(20B)  | 120.0      |
| H(20A)-C(20)-H(20B) | 120.0      |

---

Symmetry transformations used to generate equivalent atoms:

**Table 4. Anisotropic displacement parameters ( $\approx^2 \times 10^4$ ) for rac13. The anisotropic displacement factor exponent takes the form:  $-2\pi^2 [ h^2 a^* U^{11} + \dots + 2 h k a^* b^* U^{12} ]$**

|       | U <sup>11</sup> | U <sup>22</sup> | U <sup>33</sup> | U <sup>23</sup> | U <sup>13</sup> | U <sup>12</sup> |
|-------|-----------------|-----------------|-----------------|-----------------|-----------------|-----------------|
| S(1)  | 146(1)          | 147(1)          | 372(2)          | 67(1)           | -20(1)          | 19(1)           |
| O(1)  | 275(6)          | 192(4)          | 326(5)          | -16(4)          | -66(4)          | -65(4)          |
| O(2)  | 204(5)          | 218(4)          | 232(4)          | -6(3)           | -28(3)          | -45(3)          |
| O(3)  | 261(5)          | 201(4)          | 313(5)          | -57(4)          | -71(4)          | 32(4)           |
| O(4)  | 175(5)          | 176(4)          | 300(5)          | -10(3)          | -55(3)          | 60(3)           |
| N(1)  | 170(5)          | 157(4)          | 275(5)          | 8(4)            | -34(4)          | -1(4)           |
| C(1)  | 140(6)          | 152(5)          | 228(5)          | 21(4)           | -52(4)          | -1(4)           |
| C(2)  | 142(6)          | 134(5)          | 259(6)          | 23(4)           | -55(4)          | -3(4)           |
| C(3)  | 136(6)          | 125(5)          | 245(5)          | 10(4)           | -47(4)          | 5(4)            |
| C(4)  | 160(6)          | 127(5)          | 256(6)          | 6(4)            | -50(5)          | 11(4)           |
| C(5)  | 138(5)          | 139(5)          | 181(5)          | 20(4)           | -28(4)          | 4(4)            |
| C(6)  | 174(6)          | 184(5)          | 173(5)          | 13(4)           | -19(4)          | 7(4)            |
| C(7)  | 185(6)          | 211(6)          | 210(5)          | 35(4)           | -70(5)          | -12(5)          |
| C(8)  | 145(6)          | 157(5)          | 286(6)          | 54(4)           | -41(5)          | -6(4)           |
| C(9)  | 177(6)          | 168(5)          | 237(5)          | 19(4)           | 25(5)           | 20(4)           |
| C(10) | 192(6)          | 127(5)          | 180(5)          | 16(4)           | -14(4)          | 13(4)           |
| C(11) | 258(7)          | 331(7)          | 186(5)          | -2(5)           | 10(5)           | 35(6)           |
| C(12) | 152(6)          | 289(7)          | 436(8)          | 87(6)           | -65(6)          | 12(5)           |
| C(13) | 311(8)          | 249(6)          | 171(5)          | -12(5)          | -13(5)          | 31(5)           |
| C(14) | 130(6)          | 132(5)          | 272(6)          | 0(4)            | -39(4)          | 27(4)           |
| C(15) | 236(7)          | 302(7)          | 241(6)          | -38(5)          | -11(5)          | -12(5)          |
| C(16) | 158(6)          | 137(5)          | 248(6)          | 31(4)           | -22(5)          | 14(4)           |
| C(17) | 232(7)          | 237(7)          | 401(8)          | -37(6)          | -48(6)          | 116(5)          |
| C(18) | 207(7)          | 182(5)          | 301(6)          | 22(5)           | -30(5)          | -21(5)          |
| C(19) | 219(7)          | 292(7)          | 309(7)          | 32(5)           | -34(5)          | -87(5)          |
| C(20) | 211(7)          | 391(8)          | 323(7)          | -5(6)           | 2(6)            | -20(6)          |

**Table 5. Hydrogen coordinates (  $\times 10^3$  ) and isotropic displacement parameters ( $\approx^2 \times 10^3$ ) for rac13.**

|        | x    | y   | z   | U <sub>iso</sub> |
|--------|------|-----|-----|------------------|
| H(1)   | 622  | 645 | 518 | 21               |
| H(2A)  | 631  | 504 | 490 | 22               |
| H(2B)  | 641  | 510 | 296 | 22               |
| H(7)   | 377  | 636 | 25  | 24               |
| H(9)   | 320  | 682 | 492 | 23               |
| H(11A) | 516  | 576 | -44 | 39               |
| H(11B) | 601  | 570 | 84  | 39               |
| H(11C) | 578  | 656 | -2  | 39               |
| H(12A) | 227  | 677 | 81  | 44               |
| H(12B) | 221  | 740 | 230 | 44               |
| H(12C) | 195  | 645 | 255 | 44               |
| H(13A) | 424  | 663 | 704 | 37               |
| H(13B) | 522  | 701 | 665 | 37               |
| H(13C) | 509  | 603 | 672 | 37               |
| H(15A) | 839  | 538 | 896 | 39               |
| H(15B) | 745  | 496 | 949 | 39               |
| H(15C) | 748  | 593 | 910 | 39               |
| H(17A) | 907  | 335 | 441 | 44               |
| H(17B) | 994  | 382 | 520 | 44               |
| H(17C) | 968  | 394 | 330 | 44               |
| H(18A) | 899  | 735 | 211 | 28               |
| H(18B) | 834  | 697 | 68  | 28               |
| H(19)  | 984  | 711 | -34 | 33               |
| H(20A) | 1009 | 561 | 128 | 37               |
| H(20B) | 1072 | 599 | -17 | 37               |

**Table 1. Crystal Data and Structure Analysis Details for (*R*)-6a•HBr.**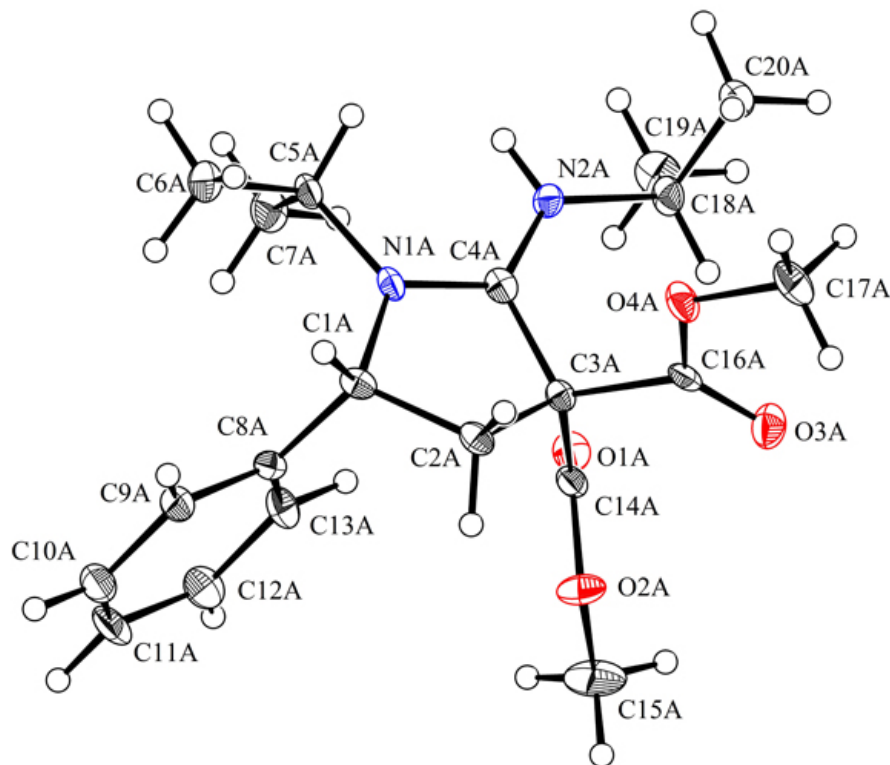

|                         |                                                                  |
|-------------------------|------------------------------------------------------------------|
| Empirical formula       | C <sub>20</sub> H <sub>31</sub> Br N <sub>2</sub> O <sub>5</sub> |
| Formula weight          | 459.38                                                           |
| Crystallization solvent | diethyl ether / dichloromethane                                  |
| Crystal shape           | prism                                                            |
| Crystal color           | colourless                                                       |
| Crystal size            | 0.17 x 0.18 x 0.47 mm                                            |

### Data Collection

|                                                                |                                                                                                                 |
|----------------------------------------------------------------|-----------------------------------------------------------------------------------------------------------------|
| Preliminary photograph(s)                                      | rotation                                                                                                        |
| Type of diffractometer                                         | Bruker KAPPA APEX II                                                                                            |
| Wavelength                                                     | 0.71073 $\approx$ MO K                                                                                          |
| Data collection temperature                                    | 100.15 K                                                                                                        |
| Theta range for 9397 reflections used in lattice determination | 2.620 to 31.334 $^\circ$                                                                                        |
| Unit cell dimensions                                           | a = 8.0748(6) $\approx$ $\alpha$ = 98.815(5) $^\circ$<br>b = 15.1323(12) $\approx$ $\beta$ = 92.189(5) $^\circ$ |



|                                       |                                                                    |                             |
|---------------------------------------|--------------------------------------------------------------------|-----------------------------|
|                                       | $c = 29.190(2) \approx$                                            | $\gamma = 105.250(4)^\circ$ |
| Volume                                | $3388.9(5) \approx^3$                                              |                             |
| Z                                     | 6                                                                  |                             |
| Crystal system                        | triclinic                                                          |                             |
| Space group                           | P 1 (# 1)                                                          |                             |
| Density (calculated)                  | $1.351 \text{ g/cm}^3$                                             |                             |
| F(000)                                | 1440                                                               |                             |
| Theta range for data collection       | $1.7$ to $35.3^\circ$                                              |                             |
| Completeness to theta = $25.00^\circ$ | 99.7%                                                              |                             |
| Index ranges                          | $-12 \leq h \leq 12$ , $-24 \leq k \leq 24$ , $-46 \leq l \leq 45$ |                             |
| Data collection scan type             | narrow and scans                                                   |                             |
| Reflections collected                 | 161414                                                             |                             |
| Independent reflections               | 54469 [ $R_{\text{int}} = 0.0430$ ]                                |                             |
| Reflections > $2\sigma(I)$            | 44420                                                              |                             |
| Average $\sigma(I)/(\text{net } I)$   | 0.0781                                                             |                             |
| Absorption coefficient                | $1.85 \text{ mm}^{-1}$                                             |                             |
| Absorption correction                 | Semi-empirical from equivalents                                    |                             |
| Max. and min. transmission            | 1.0000 and 0.8047                                                  |                             |
| Reflections monitored for decay       | 0                                                                  |                             |
| Decay of standards                    | 0%                                                                 |                             |

### Structure Solution and Refinement

|                                                         |                                                                      |
|---------------------------------------------------------|----------------------------------------------------------------------|
| Primary solution method                                 | direct                                                               |
| Secondary solution method                               | difmap                                                               |
| Hydrogen placement                                      | geom                                                                 |
| Refinement method                                       | Full-matrix least-squares on $F^2$                                   |
| Data / restraints / parameters                          | 54469 / 21 / 1585                                                    |
| Treatment of hydrogen atoms                             | mixed                                                                |
| Goodness-of-fit on $F^2$                                | 1.65                                                                 |
| Final R indices [ $I > 2\sigma(I)$ , 44420 reflections] | $R_1 = 0.0568$ , $wR_2 = 0.1138$                                     |
| R indices (all data)                                    | $R_1 = 0.0743$ , $wR_2 = 0.1159$                                     |
| Type of weighting scheme used                           | calc                                                                 |
| Weighting scheme used                                   | $\text{calc } w = 1/[\sigma^2(F_o^2) + (0.0000P)^2 + 0.0000P]$ where |
| $P = (F_o^2 + 2F_c^2)/3$                                |                                                                      |
| Max shift/error                                         | 0.001                                                                |
| Average shift/error                                     | 0.000                                                                |
| Absolute structure parameter                            | 0.029(3)                                                             |

Largest diff. peak and hole

3.05 and -1.34 e $\Sigma$  $\approx$ <sup>-3</sup>**Programs Used**

|                      |                                   |
|----------------------|-----------------------------------|
| Cell refinement      | SAINT V8.18C (Bruker-AXS, 2007)   |
| Data collection      | APEX2_2011.2-3 (Bruker-AXS, 2007) |
| Data reduction       | SAINT V8.18C (Bruker-AXS, 2007)   |
| Structure solution   | SHELXS-97 (Sheldrick, 1990)       |
| Structure refinement |                                   |
| Graphics             |                                   |

**Table 2. Atomic coordinates (x 10<sup>4</sup>) and equivalent isotropic displacement parameters ( $\approx$ 2x 10<sup>3</sup>) for afg04. U(eq) is defined as one third of the trace of the orthogonalized U<sup>ij</sup> tensor.**

|        | x       | y       | z       | U <sub>eq</sub> |
|--------|---------|---------|---------|-----------------|
| O(1A)  | 5205(3) | 3297(1) | 8553(1) | 18(1)           |
| O(2A)  | 8042(3) | 3464(1) | 8523(1) | 23(1)           |
| O(3A)  | 7013(3) | 1830(2) | 9013(1) | 23(1)           |
| O(4A)  | 6394(3) | 573(1)  | 8452(1) | 19(1)           |
| N(1A)  | 4511(3) | 1542(2) | 7520(1) | 13(1)           |
| N(2A)  | 2967(3) | 1288(2) | 8164(1) | 14(1)           |
| C(1A)  | 6285(4) | 1836(2) | 7379(1) | 14(1)           |
| C(2A)  | 7391(4) | 1877(2) | 7827(1) | 14(1)           |
| C(3A)  | 6203(4) | 1976(2) | 8227(1) | 12(1)           |
| C(4A)  | 4428(4) | 1573(2) | 7975(1) | 14(1)           |
| C(5A)  | 2951(4) | 1256(2) | 7188(1) | 16(1)           |
| C(6A)  | 3358(5) | 925(2)  | 6694(1) | 24(1)           |
| C(7A)  | 2076(4) | 2039(2) | 7207(1) | 23(1)           |
| C(8A)  | 6672(4) | 2728(2) | 7175(1) | 15(1)           |
| C(9A)  | 7542(4) | 2761(2) | 6775(1) | 18(1)           |
| C(10A) | 8003(4) | 3575(2) | 6590(1) | 21(1)           |
| C(11A) | 7600(4) | 4364(2) | 6807(1) | 23(1)           |
| C(12A) | 6731(4) | 4340(2) | 7206(1) | 22(1)           |
| C(13A) | 6259(4) | 3527(2) | 7390(1) | 18(1)           |
| C(14A) | 6408(4) | 2992(2) | 8455(1) | 14(1)           |
| C(15A) | 8393(5) | 4430(2) | 8746(1) | 34(1)           |
| C(16A) | 6583(4) | 1461(2) | 8621(1) | 14(1)           |
| C(17A) | 6827(5) | 27(2)   | 8784(1) | 25(1)           |
| C(18A) | 2705(4) | 1332(2) | 8666(1) | 18(1)           |
| C(19A) | 1333(5) | 1853(2) | 8773(1) | 26(1)           |
| C(20A) | 2143(4) | 350(2)  | 8781(1) | 23(1)           |
| O(1B)  | 2761(3) | 3136(1) | 5141(1) | 17(1)           |
| O(2B)  | 5580(3) | 3478(1) | 5045(1) | 21(1)           |
| O(3B)  | 5020(3) | 2039(1) | 5691(1) | 20(1)           |
| O(4B)  | 4388(3) | 642(1)  | 5224(1) | 15(1)           |
| N(1B)  | 2497(3) | 1144(2) | 4168(1) | 13(1)           |

|        |          |         |         |       |
|--------|----------|---------|---------|-------|
| N(2B)  | 861(3)   | 1029(2) | 4810(1) | 13(1) |
| C(1B)  | 4227(4)  | 1579(2) | 4036(1) | 12(1) |
| C(2B)  | 5323(4)  | 1771(2) | 4507(1) | 14(1) |
| C(3B)  | 4061(4)  | 1890(2) | 4879(1) | 11(1) |
| C(4B)  | 2345(4)  | 1315(2) | 4624(1) | 10(1) |
| C(5B)  | 1134(4)  | 495(2)  | 3828(1) | 16(1) |
| C(6B)  | 1108(6)  | -489(2) | 3872(1) | 34(1) |
| C(7B)  | 1377(5)  | 664(2)  | 3331(1) | 25(1) |
| C(8B)  | 4279(4)  | 2426(2) | 3819(1) | 16(1) |
| C(9B)  | 5329(4)  | 2597(2) | 3455(1) | 20(1) |
| C(10B) | 5427(5)  | 3384(2) | 3252(1) | 27(1) |
| C(11B) | 4507(5)  | 4012(2) | 3411(1) | 27(1) |
| C(12B) | 3444(5)  | 3838(2) | 3769(1) | 29(1) |
| C(13B) | 3321(4)  | 3048(2) | 3970(1) | 21(1) |
| C(14B) | 4016(4)  | 2910(2) | 5039(1) | 14(1) |
| C(15B) | 5731(5)  | 4454(2) | 5218(1) | 35(1) |
| C(16B) | 4545(4)  | 1538(2) | 5321(1) | 11(1) |
| C(17B) | 4834(4)  | 217(2)  | 5610(1) | 19(1) |
| C(18B) | 562(4)   | 1128(2) | 5308(1) | 16(1) |
| C(19B) | -769(4)  | 1662(2) | 5395(1) | 24(1) |
| C(20B) | 24(5)    | 159(2)  | 5438(1) | 23(1) |
| O(1C)  | 7414(3)  | 3248(1) | 1843(1) | 18(1) |
| O(2C)  | 10170(3) | 3462(1) | 1676(1) | 20(1) |
| O(3C)  | 9486(3)  | 1908(1) | 2270(1) | 18(1) |
| O(4C)  | 8375(3)  | 559(1)  | 1779(1) | 17(1) |
| N(1C)  | 6577(3)  | 1420(2) | 803(1)  | 12(1) |
| N(2C)  | 5107(3)  | 1248(2) | 1469(1) | 14(1) |
| C(1C)  | 8322(4)  | 1713(2) | 645(1)  | 14(1) |
| C(2C)  | 9463(4)  | 1764(2) | 1090(1) | 14(1) |
| C(3C)  | 8351(4)  | 1926(2) | 1498(1) | 12(1) |
| C(4C)  | 6541(4)  | 1503(2) | 1260(1) | 12(1) |
| C(5C)  | 4995(4)  | 1095(2) | 474(1)  | 16(1) |
| C(6C)  | 5401(5)  | 735(2)  | -8(1)   | 25(1) |
| C(7C)  | 4090(4)  | 1873(2) | 480(1)  | 23(1) |
| C(8C)  | 8674(4)  | 2610(2) | 448(1)  | 14(1) |
| C(9C)  | 9607(4)  | 2662(2) | 57(1)   | 17(1) |
| C(10C) | 10051(4) | 3492(2) | -124(1) | 22(1) |
| C(11C) | 9592(4)  | 4260(2) | 85(1)   | 21(1) |
| C(12C) | 8658(4)  | 4211(2) | 475(1)  | 19(1) |
| C(13C) | 8190(4)  | 3389(2) | 650(1)  | 17(1) |
| C(14C) | 8566(4)  | 2959(2) | 1696(1) | 15(1) |
| C(15C) | 10528(5) | 4459(2) | 1838(1) | 28(1) |
| C(16C) | 8817(4)  | 1481(2) | 1902(1) | 13(1) |
| C(17C) | 8809(5)  | 56(2)   | 2138(1) | 24(1) |
| C(18C) | 4905(4)  | 1339(2) | 1975(1) | 15(1) |
| C(19C) | 3653(5)  | 1915(2) | 2094(1) | 24(1) |
| C(20C) | 4316(4)  | 374(2)  | 2103(1) | 20(1) |
| O(1D)  | 1240(3)  | 5108(1) | 6240(1) | 20(1) |
| O(2D)  | 3700(3)  | 4743(1) | 6402(1) | 20(1) |
| O(3D)  | 4660(3)  | 6149(1) | 5724(1) | 18(1) |
| O(4D)  | 5282(3)  | 7583(1) | 6158(1) | 16(1) |
| N(1D)  | 3160(3)  | 7177(2) | 7194(1) | 15(1) |
| N(2D)  | 1547(3)  | 7222(2) | 6524(1) | 14(1) |
| C(1D)  | 4426(4)  | 6735(2) | 7354(1) | 16(1) |

|        |          |         |         |       |
|--------|----------|---------|---------|-------|
| C(2D)  | 5261(4)  | 6488(2) | 6909(1) | 15(1) |
| C(3D)  | 3823(4)  | 6343(2) | 6516(1) | 13(1) |
| C(4D)  | 2718(4)  | 6949(2) | 6737(1) | 12(1) |
| C(5D)  | 2529(5)  | 7876(2) | 7495(1) | 21(1) |
| C(6D)  | 3492(7)  | 8846(2) | 7419(1) | 44(1) |
| C(7D)  | 2737(6)  | 7782(3) | 8001(1) | 40(1) |
| C(8D)  | 3631(4)  | 5924(2) | 7600(1) | 16(1) |
| C(9D)  | 4577(4)  | 5780(2) | 7978(1) | 19(1) |
| C(10D) | 3931(5)  | 5037(2) | 8204(1) | 24(1) |
| C(11D) | 2319(5)  | 4419(2) | 8048(1) | 24(1) |
| C(12D) | 1365(4)  | 4564(2) | 7676(1) | 24(1) |
| C(13D) | 2023(4)  | 5321(2) | 7453(1) | 19(1) |
| C(14D) | 2742(4)  | 5328(2) | 6366(1) | 14(1) |
| C(15D) | 2805(5)  | 3759(2) | 6283(1) | 26(1) |
| C(16D) | 4603(4)  | 6663(2) | 6069(1) | 18(1) |
| C(17D) | 6055(4)  | 7985(2) | 5766(1) | 20(1) |
| C(18D) | 1059(4)  | 7056(2) | 6019(1) | 16(1) |
| C(19D) | -850(4)  | 6519(2) | 5928(1) | 22(1) |
| C(20D) | 1460(5)  | 7990(2) | 5849(1) | 23(1) |
| O(1E)  | 8189(3)  | 5002(1) | 2884(1) | 17(1) |
| O(2E)  | 10789(3) | 4812(1) | 3084(1) | 20(1) |
| O(3E)  | 11510(3) | 6349(1) | 2459(1) | 19(1) |
| O(4E)  | 11784(3) | 7706(1) | 2936(1) | 16(1) |
| N(1E)  | 9306(3)  | 6863(2) | 3901(1) | 14(1) |
| N(2E)  | 7912(3)  | 7004(2) | 3214(1) | 13(1) |
| C(1E)  | 10840(4) | 6612(2) | 4078(1) | 15(1) |
| C(2E)  | 11850(4) | 6544(2) | 3643(1) | 16(1) |
| C(3E)  | 10485(4) | 6346(2) | 3224(1) | 13(1) |
| C(4E)  | 9125(4)  | 6767(2) | 3441(1) | 12(1) |
| C(5E)  | 8093(4)  | 7202(2) | 4207(1) | 17(1) |
| C(6E)  | 8924(5)  | 7597(2) | 4695(1) | 24(1) |
| C(7E)  | 6434(4)  | 6429(2) | 4205(1) | 25(1) |
| C(8E)  | 10401(4) | 5743(2) | 4298(1) | 14(1) |
| C(9E)  | 11448(4) | 5716(2) | 4684(1) | 18(1) |
| C(10E) | 11196(5) | 4923(2) | 4890(1) | 24(1) |
| C(11E) | 9887(4)  | 4130(2) | 4696(1) | 25(1) |
| C(12E) | 8829(4)  | 4150(2) | 4313(1) | 22(1) |
| C(13E) | 9087(4)  | 4951(2) | 4113(1) | 20(1) |
| C(14E) | 9677(4)  | 5308(2) | 3044(1) | 13(1) |
| C(15E) | 10098(5) | 3806(2) | 2945(1) | 28(1) |
| C(16E) | 11305(4) | 6788(2) | 2820(1) | 13(1) |
| C(17E) | 12685(5) | 8211(2) | 2588(1) | 22(1) |
| C(18E) | 7528(4)  | 6881(2) | 2704(1) | 14(1) |
| C(19E) | 5668(4)  | 6298(2) | 2585(1) | 19(1) |
| C(20E) | 7882(4)  | 7829(2) | 2556(1) | 20(1) |
| O(1F)  | 3235(3)  | 5134(1) | -412(1) | 19(1) |
| O(2F)  | 5671(3)  | 4755(1) | -225(1) | 18(1) |
| O(3F)  | 6672(3)  | 6143(1) | -899(1) | 18(1) |
| O(4F)  | 7152(3)  | 7587(1) | -500(1) | 16(1) |
| N(1F)  | 5150(3)  | 7135(2) | 573(1)  | 13(1) |
| N(2F)  | 3519(3)  | 7236(2) | -81(1)  | 12(1) |
| C(1F)  | 6479(4)  | 6698(2) | 719(1)  | 14(1) |
| C(2F)  | 7291(4)  | 6503(2) | 261(1)  | 14(1) |
| C(3F)  | 5819(4)  | 6356(2) | -119(1) | 12(1) |

|        |         |         |         |       |
|--------|---------|---------|---------|-------|
| C(4F)  | 4727(4) | 6948(2) | 117(1)  | 12(1) |
| C(5F)  | 4508(5) | 7803(2) | 905(1)  | 21(1) |
| C(6F)  | 5459(6) | 8792(2) | 852(1)  | 36(1) |
| C(7F)  | 4692(5) | 7654(2) | 1401(1) | 27(1) |
| C(8F)  | 5722(4) | 5850(2) | 939(1)  | 16(1) |
| C(9F)  | 6733(5) | 5676(2) | 1296(1) | 21(1) |
| C(10F) | 6146(5) | 4885(2) | 1498(1) | 26(1) |
| C(11F) | 4527(5) | 4264(2) | 1334(1) | 32(1) |
| C(12F) | 3517(5) | 4448(2) | 988(1)  | 30(1) |
| C(13F) | 4112(4) | 5250(2) | 793(1)  | 22(1) |
| C(14F) | 4735(4) | 5344(2) | -269(1) | 14(1) |
| C(15F) | 4757(5) | 3776(2) | -342(1) | 23(1) |
| C(16F) | 6572(4) | 6673(2) | -552(1) | 11(1) |
| C(17F) | 7860(4) | 7967(2) | -903(1) | 20(1) |
| C(18F) | 3033(4) | 7127(2) | -582(1) | 15(1) |
| C(19F) | 1129(4) | 6619(2) | -683(1) | 21(1) |
| C(20F) | 3407(5) | 8094(2) | -714(1) | 23(1) |
| Br(1A) | 8079(1) | 123(1)  | 6649(1) | 21(1) |
| Br(1B) | 6474(1) | 134(1)  | 3290(1) | 18(1) |
| Br(1C) | 137(1)  | -30(1)  | -14(1)  | 21(1) |
| Br(1D) | 8418(1) | 8234(1) | 7949(1) | 23(1) |
| Br(1E) | 4521(1) | 8396(1) | 4618(1) | 20(1) |
| Br(1F) | 358(1)  | 8210(1) | 1391(1) | 21(1) |
| O(5A)  | 9657(3) | 349(1)  | 7734(1) | 19(1) |
| O(5B)  | 7574(3) | 112(2)  | 4381(1) | 21(1) |
| O(5C)  | 1767(3) | 255(2)  | 1077(1) | 20(1) |
| O(5D)  | 9265(3) | 8257(2) | 6859(1) | 25(1) |
| O(5E)  | 5655(3) | 8046(1) | 3544(1) | 18(1) |
| O(5F)  | 1187(3) | 8178(2) | 296(1)  | 24(1) |

---

**Table 3. Bond lengths [ $\approx$ ] and angles [ $\infty$ ] for afg04.**


---

|               |          |
|---------------|----------|
| O(1A)-C(14A)  | 1.207(4) |
| O(2A)-C(14A)  | 1.316(4) |
| O(2A)-C(15A)  | 1.456(3) |
| O(3A)-C(16A)  | 1.189(3) |
| O(4A)-C(16A)  | 1.326(3) |
| O(4A)-C(17A)  | 1.454(4) |
| N(1A)-C(1A)   | 1.479(4) |
| N(1A)-C(4A)   | 1.327(3) |
| N(1A)-C(5A)   | 1.483(4) |
| N(2A)-H(2A)   | 0.8800   |
| N(2A)-C(4A)   | 1.319(4) |
| N(2A)-C(18A)  | 1.482(4) |
| C(1A)-H(1A)   | 1.0000   |
| C(1A)-C(2A)   | 1.539(4) |
| C(1A)-C(8A)   | 1.521(4) |
| C(2A)-H(2AA)  | 0.9900   |
| C(2A)-H(2AB)  | 0.9900   |
| C(2A)-C(3A)   | 1.555(4) |
| C(3A)-C(4A)   | 1.513(4) |
| C(3A)-C(14A)  | 1.541(4) |
| C(3A)-C(16A)  | 1.548(4) |
| C(5A)-H(5A)   | 1.0000   |
| C(5A)-C(6A)   | 1.531(4) |
| C(5A)-C(7A)   | 1.527(4) |
| C(6A)-H(6AA)  | 0.9800   |
| C(6A)-H(6AB)  | 0.9800   |
| C(6A)-H(6AC)  | 0.9800   |
| C(7A)-H(7AA)  | 0.9800   |
| C(7A)-H(7AB)  | 0.9800   |
| C(7A)-H(7AC)  | 0.9800   |
| C(8A)-C(9A)   | 1.386(4) |
| C(8A)-C(13A)  | 1.401(4) |
| C(9A)-H(9A)   | 0.9500   |
| C(9A)-C(10A)  | 1.388(4) |
| C(10A)-H(10A) | 0.9500   |
| C(10A)-C(11A) | 1.386(5) |
| C(11A)-H(11A) | 0.9500   |
| C(11A)-C(12A) | 1.382(4) |
| C(12A)-H(12A) | 0.9500   |
| C(12A)-C(13A) | 1.385(4) |
| C(13A)-H(13A) | 0.9500   |
| C(15A)-H(15G) | 0.9800   |
| C(15A)-H(15H) | 0.9800   |
| C(15A)-H(15I) | 0.9800   |
| C(17A)-H(17G) | 0.9800   |
| C(17A)-H(17H) | 0.9800   |
| C(17A)-H(17I) | 0.9800   |
| C(18A)-H(18A) | 1.0000   |
| C(18A)-C(19A) | 1.535(5) |
| C(18A)-C(20A) | 1.529(4) |
| C(19A)-H(19G) | 0.9800   |

|               |          |
|---------------|----------|
| C(19A)-H(19H) | 0.9800   |
| C(19A)-H(19I) | 0.9800   |
| C(20A)-H(20G) | 0.9800   |
| C(20A)-H(20H) | 0.9800   |
| C(20A)-H(20I) | 0.9800   |
| O(1B)-C(14B)  | 1.186(4) |
| O(2B)-C(14B)  | 1.325(3) |
| O(2B)-C(15B)  | 1.456(4) |
| O(3B)-C(16B)  | 1.204(3) |
| O(4B)-C(16B)  | 1.314(3) |
| O(4B)-C(17B)  | 1.458(3) |
| N(1B)-C(1B)   | 1.473(4) |
| N(1B)-C(4B)   | 1.332(3) |
| N(1B)-C(5B)   | 1.485(3) |
| N(2B)-H(2B)   | 0.8800   |
| N(2B)-C(4B)   | 1.330(4) |
| N(2B)-C(18B)  | 1.473(3) |
| C(1B)-H(1B)   | 1.0000   |
| C(1B)-C(2B)   | 1.552(4) |
| C(1B)-C(8B)   | 1.505(4) |
| C(2B)-H(2BA)  | 0.9900   |
| C(2B)-H(2BB)  | 0.9900   |
| C(2B)-C(3B)   | 1.540(4) |
| C(3B)-C(4B)   | 1.524(4) |
| C(3B)-C(14B)  | 1.552(4) |
| C(3B)-C(16B)  | 1.544(4) |
| C(5B)-H(5B)   | 1.0000   |
| C(5B)-C(6B)   | 1.509(5) |
| C(5B)-C(7B)   | 1.523(4) |
| C(6B)-H(6BA)  | 0.9800   |
| C(6B)-H(6BB)  | 0.9800   |
| C(6B)-H(6BC)  | 0.9800   |
| C(7B)-H(7BA)  | 0.9800   |
| C(7B)-H(7BB)  | 0.9800   |
| C(7B)-H(7BC)  | 0.9800   |
| C(8B)-C(9B)   | 1.398(4) |
| C(8B)-C(13B)  | 1.401(4) |
| C(9B)-H(9B)   | 0.9500   |
| C(9B)-C(10B)  | 1.395(4) |
| C(10B)-H(10B) | 0.9500   |
| C(10B)-C(11B) | 1.391(5) |
| C(11B)-H(11B) | 0.9500   |
| C(11B)-C(12B) | 1.391(5) |
| C(12B)-H(12B) | 0.9500   |
| C(12B)-C(13B) | 1.393(4) |
| C(13B)-H(13B) | 0.9500   |
| C(15B)-H(15D) | 0.9800   |
| C(15B)-H(15E) | 0.9800   |
| C(15B)-H(15F) | 0.9800   |
| C(17B)-H(17D) | 0.9800   |
| C(17B)-H(17E) | 0.9800   |
| C(17B)-H(17F) | 0.9800   |
| C(18B)-H(18B) | 1.0000   |
| C(18B)-C(19B) | 1.513(5) |

|               |          |
|---------------|----------|
| C(18B)-C(20B) | 1.527(4) |
| C(19B)-H(19D) | 0.9800   |
| C(19B)-H(19E) | 0.9800   |
| C(19B)-H(19F) | 0.9800   |
| C(20B)-H(20D) | 0.9800   |
| C(20B)-H(20E) | 0.9800   |
| C(20B)-H(20F) | 0.9800   |
| O(1C)-C(14C)  | 1.194(4) |
| O(2C)-C(14C)  | 1.327(4) |
| O(2C)-C(15C)  | 1.457(3) |
| O(3C)-C(16C)  | 1.192(3) |
| O(4C)-C(16C)  | 1.334(3) |
| O(4C)-C(17C)  | 1.470(4) |
| N(1C)-C(1C)   | 1.476(4) |
| N(1C)-C(4C)   | 1.322(3) |
| N(1C)-C(5C)   | 1.492(4) |
| N(2C)-H(2C)   | 0.8800   |
| N(2C)-C(4C)   | 1.324(4) |
| N(2C)-C(18C)  | 1.481(3) |
| C(1C)-H(1C)   | 1.0000   |
| C(1C)-C(2C)   | 1.544(4) |
| C(1C)-C(8C)   | 1.517(4) |
| C(2C)-H(2CA)  | 0.9900   |
| C(2C)-H(2CB)  | 0.9900   |
| C(2C)-C(3C)   | 1.546(4) |
| C(3C)-C(4C)   | 1.524(4) |
| C(3C)-C(14C)  | 1.544(4) |
| C(3C)-C(16C)  | 1.525(4) |
| C(5C)-H(5C)   | 1.0000   |
| C(5C)-C(6C)   | 1.510(4) |
| C(5C)-C(7C)   | 1.539(4) |
| C(6C)-H(6CA)  | 0.9800   |
| C(6C)-H(6CB)  | 0.9800   |
| C(6C)-H(6CC)  | 0.9800   |
| C(7C)-H(7CA)  | 0.9800   |
| C(7C)-H(7CB)  | 0.9800   |
| C(7C)-H(7CC)  | 0.9800   |
| C(8C)-C(9C)   | 1.392(4) |
| C(8C)-C(13C)  | 1.391(4) |
| C(9C)-H(9C)   | 0.9500   |
| C(9C)-C(10C)  | 1.403(4) |
| C(10C)-H(10C) | 0.9500   |
| C(10C)-C(11C) | 1.373(5) |
| C(11C)-H(11C) | 0.9500   |
| C(11C)-C(12C) | 1.390(4) |
| C(12C)-H(12C) | 0.9500   |
| C(12C)-C(13C) | 1.383(4) |
| C(13C)-H(13C) | 0.9500   |
| C(15C)-H(15A) | 0.9800   |
| C(15C)-H(15B) | 0.9800   |
| C(15C)-H(15C) | 0.9800   |
| C(17C)-H(17A) | 0.9800   |
| C(17C)-H(17B) | 0.9800   |
| C(17C)-H(17C) | 0.9800   |



|               |          |
|---------------|----------|
| C(18C)-H(18C) | 1.0000   |
| C(18C)-C(19C) | 1.516(5) |
| C(18C)-C(20C) | 1.522(4) |
| C(19C)-H(19A) | 0.9800   |
| C(19C)-H(19B) | 0.9800   |
| C(19C)-H(19C) | 0.9800   |
| C(20C)-H(20A) | 0.9800   |
| C(20C)-H(20B) | 0.9800   |
| C(20C)-H(20C) | 0.9800   |
| O(1D)-C(14D)  | 1.197(4) |
| O(2D)-C(14D)  | 1.333(4) |
| O(2D)-C(15D)  | 1.454(3) |
| O(3D)-C(16D)  | 1.184(4) |
| O(4D)-C(16D)  | 1.335(3) |
| O(4D)-C(17D)  | 1.462(3) |
| N(1D)-C(1D)   | 1.460(4) |
| N(1D)-C(4D)   | 1.335(3) |
| N(1D)-C(5D)   | 1.478(4) |
| N(2D)-H(2D)   | 0.8800   |
| N(2D)-C(4D)   | 1.300(4) |
| N(2D)-C(18D)  | 1.477(4) |
| C(1D)-H(1D)   | 1.0000   |
| C(1D)-C(2D)   | 1.529(4) |
| C(1D)-C(8D)   | 1.525(4) |
| C(2D)-H(2DA)  | 0.9900   |
| C(2D)-H(2DB)  | 0.9900   |
| C(2D)-C(3D)   | 1.549(4) |
| C(3D)-C(4D)   | 1.531(4) |
| C(3D)-C(14D)  | 1.541(4) |
| C(3D)-C(16D)  | 1.559(4) |
| C(5D)-H(5D)   | 1.0000   |
| C(5D)-C(6D)   | 1.523(5) |
| C(5D)-C(7D)   | 1.514(4) |
| C(6D)-H(6DA)  | 0.9800   |
| C(6D)-H(6DB)  | 0.9800   |
| C(6D)-H(6DC)  | 0.9800   |
| C(7D)-H(7DA)  | 0.9800   |
| C(7D)-H(7DB)  | 0.9800   |
| C(7D)-H(7DC)  | 0.9800   |
| C(8D)-C(9D)   | 1.394(4) |
| C(8D)-C(13D)  | 1.384(4) |
| C(9D)-H(9D)   | 0.9500   |
| C(9D)-C(10D)  | 1.385(4) |
| C(10D)-H(10D) | 0.9500   |
| C(10D)-C(11D) | 1.400(5) |
| C(11D)-H(11D) | 0.9500   |
| C(11D)-C(12D) | 1.384(5) |
| C(12D)-H(12D) | 0.9500   |
| C(12D)-C(13D) | 1.397(4) |
| C(13D)-H(13D) | 0.9500   |
| C(15D)-H(15P) | 0.9800   |
| C(15D)-H(15Q) | 0.9800   |
| C(15D)-H(15R) | 0.9800   |
| C(17D)-H(17P) | 0.9800   |

|               |          |
|---------------|----------|
| C(17D)-H(17Q) | 0.9800   |
| C(17D)-H(17R) | 0.9800   |
| C(18D)-H(18D) | 1.0000   |
| C(18D)-C(19D) | 1.533(4) |
| C(18D)-C(20D) | 1.527(4) |
| C(19D)-H(19P) | 0.9800   |
| C(19D)-H(19Q) | 0.9800   |
| C(19D)-H(19R) | 0.9800   |
| C(20D)-H(20P) | 0.9800   |
| C(20D)-H(20Q) | 0.9800   |
| C(20D)-H(20R) | 0.9800   |
| O(1E)-C(14E)  | 1.215(4) |
| O(2E)-C(14E)  | 1.325(4) |
| O(2E)-C(15E)  | 1.462(3) |
| O(3E)-C(16E)  | 1.200(3) |
| O(4E)-C(16E)  | 1.325(3) |
| O(4E)-C(17E)  | 1.465(3) |
| N(1E)-C(1E)   | 1.485(4) |
| N(1E)-C(4E)   | 1.327(3) |
| N(1E)-C(5E)   | 1.486(4) |
| N(2E)-H(2E)   | 0.8800   |
| N(2E)-C(4E)   | 1.317(4) |
| N(2E)-C(18E)  | 1.481(4) |
| C(1E)-H(1E)   | 1.0000   |
| C(1E)-C(2E)   | 1.541(4) |
| C(1E)-C(8E)   | 1.515(4) |
| C(2E)-H(2EA)  | 0.9900   |
| C(2E)-H(2EB)  | 0.9900   |
| C(2E)-C(3E)   | 1.553(4) |
| C(3E)-C(4E)   | 1.520(4) |
| C(3E)-C(14E)  | 1.533(4) |
| C(3E)-C(16E)  | 1.532(4) |
| C(5E)-H(5E)   | 1.0000   |
| C(5E)-C(6E)   | 1.514(4) |
| C(5E)-C(7E)   | 1.528(4) |
| C(6E)-H(6EA)  | 0.9800   |
| C(6E)-H(6EB)  | 0.9800   |
| C(6E)-H(6EC)  | 0.9800   |
| C(7E)-H(7EA)  | 0.9800   |
| C(7E)-H(7EB)  | 0.9800   |
| C(7E)-H(7EC)  | 0.9800   |
| C(8E)-C(9E)   | 1.394(4) |
| C(8E)-C(13E)  | 1.394(4) |
| C(9E)-H(9E)   | 0.9500   |
| C(9E)-C(10E)  | 1.396(4) |
| C(10E)-H(10E) | 0.9500   |
| C(10E)-C(11E) | 1.398(5) |
| C(11E)-H(11E) | 0.9500   |
| C(11E)-C(12E) | 1.390(5) |
| C(12E)-H(12E) | 0.9500   |
| C(12E)-C(13E) | 1.396(4) |
| C(13E)-H(13E) | 0.9500   |
| C(15E)-H(15M) | 0.9800   |
| C(15E)-H(15N) | 0.9800   |

|               |          |
|---------------|----------|
| C(15E)-H(15O) | 0.9800   |
| C(17E)-H(17M) | 0.9800   |
| C(17E)-H(17N) | 0.9800   |
| C(17E)-H(17O) | 0.9800   |
| C(18E)-H(18E) | 1.0000   |
| C(18E)-C(19E) | 1.525(4) |
| C(18E)-C(20E) | 1.520(4) |
| C(19E)-H(19M) | 0.9800   |
| C(19E)-H(19N) | 0.9800   |
| C(19E)-H(19O) | 0.9800   |
| C(20E)-H(20M) | 0.9800   |
| C(20E)-H(20N) | 0.9800   |
| C(20E)-H(20O) | 0.9800   |
| O(1F)-C(14F)  | 1.209(4) |
| O(2F)-C(14F)  | 1.328(4) |
| O(2F)-C(15F)  | 1.451(3) |
| O(3F)-C(16F)  | 1.212(3) |
| O(4F)-C(16F)  | 1.321(3) |
| O(4F)-C(17F)  | 1.459(3) |
| N(1F)-C(1F)   | 1.481(4) |
| N(1F)-C(4F)   | 1.329(3) |
| N(1F)-C(5F)   | 1.497(4) |
| N(2F)-H(2F)   | 0.8800   |
| N(2F)-C(4F)   | 1.316(4) |
| N(2F)-C(18F)  | 1.473(3) |
| C(1F)-H(1F)   | 1.0000   |
| C(1F)-C(2F)   | 1.533(4) |
| C(1F)-C(8F)   | 1.517(4) |
| C(2F)-H(2FA)  | 0.9900   |
| C(2F)-H(2FB)  | 0.9900   |
| C(2F)-C(3F)   | 1.542(4) |
| C(3F)-C(4F)   | 1.526(4) |
| C(3F)-C(14F)  | 1.537(4) |
| C(3F)-C(16F)  | 1.513(4) |
| C(5F)-H(5F)   | 1.0000   |
| C(5F)-C(6F)   | 1.526(5) |
| C(5F)-C(7F)   | 1.506(4) |
| C(6F)-H(6FA)  | 0.9800   |
| C(6F)-H(6FB)  | 0.9800   |
| C(6F)-H(6FC)  | 0.9800   |
| C(7F)-H(7FA)  | 0.9800   |
| C(7F)-H(7FB)  | 0.9800   |
| C(7F)-H(7FC)  | 0.9800   |
| C(8F)-C(9F)   | 1.398(4) |
| C(8F)-C(13F)  | 1.383(4) |
| C(9F)-H(9F)   | 0.9500   |
| C(9F)-C(10F)  | 1.394(4) |
| C(10F)-H(10F) | 0.9500   |
| C(10F)-C(11F) | 1.410(5) |
| C(11F)-H(11F) | 0.9500   |
| C(11F)-C(12F) | 1.381(6) |
| C(12F)-H(12F) | 0.9500   |
| C(12F)-C(13F) | 1.397(4) |
| C(13F)-H(13F) | 0.9500   |

|                     |           |
|---------------------|-----------|
| C(15F)-H(15J)       | 0.9800    |
| C(15F)-H(15K)       | 0.9800    |
| C(15F)-H(15L)       | 0.9800    |
| C(17F)-H(17J)       | 0.9800    |
| C(17F)-H(17K)       | 0.9800    |
| C(17F)-H(17L)       | 0.9800    |
| C(18F)-H(18F)       | 1.0000    |
| C(18F)-C(19F)       | 1.521(4)  |
| C(18F)-C(20F)       | 1.527(4)  |
| C(19F)-H(19J)       | 0.9800    |
| C(19F)-H(19K)       | 0.9800    |
| C(19F)-H(19L)       | 0.9800    |
| C(20F)-H(20J)       | 0.9800    |
| C(20F)-H(20K)       | 0.9800    |
| C(20F)-H(20L)       | 0.9800    |
| O(5A)-H(5AA)        | 0.846(17) |
| O(5A)-H(5AB)        | 0.830(17) |
| O(5B)-H(5BA)        | 0.863(17) |
| O(5B)-H(5BB)        | 0.845(17) |
| O(5C)-H(5CA)        | 0.882(17) |
| O(5C)-H(5CB)        | 0.850(17) |
| O(5D)-H(5DA)        | 0.874(18) |
| O(5D)-H(5DB)        | 0.895(17) |
| O(5E)-H(5EA)        | 0.857(17) |
| O(5E)-H(5EB)        | 0.891(17) |
| O(5F)-H(5FA)        | 0.866(19) |
| O(5F)-H(5FB)        | 0.896(18) |
|                     |           |
| C(14A)-O(2A)-C(15A) | 115.9(3)  |
| C(16A)-O(4A)-C(17A) | 115.2(2)  |
| C(1A)-N(1A)-C(5A)   | 123.7(2)  |
| C(4A)-N(1A)-C(1A)   | 113.8(2)  |
| C(4A)-N(1A)-C(5A)   | 122.5(2)  |
| C(4A)-N(2A)-H(2A)   | 116.3     |
| C(4A)-N(2A)-C(18A)  | 127.4(3)  |
| C(18A)-N(2A)-H(2A)  | 116.3     |
| N(1A)-C(1A)-H(1A)   | 108.2     |
| N(1A)-C(1A)-C(2A)   | 102.6(2)  |
| N(1A)-C(1A)-C(8A)   | 113.9(2)  |
| C(2A)-C(1A)-H(1A)   | 108.2     |
| C(8A)-C(1A)-H(1A)   | 108.2     |
| C(8A)-C(1A)-C(2A)   | 115.3(2)  |
| C(1A)-C(2A)-H(2AA)  | 110.7     |
| C(1A)-C(2A)-H(2AB)  | 110.7     |
| C(1A)-C(2A)-C(3A)   | 105.2(2)  |
| H(2AA)-C(2A)-H(2AB) | 108.8     |
| C(3A)-C(2A)-H(2AA)  | 110.7     |
| C(3A)-C(2A)-H(2AB)  | 110.7     |
| C(4A)-C(3A)-C(2A)   | 101.9(2)  |
| C(4A)-C(3A)-C(14A)  | 109.6(2)  |
| C(4A)-C(3A)-C(16A)  | 114.3(2)  |
| C(14A)-C(3A)-C(2A)  | 113.6(2)  |
| C(14A)-C(3A)-C(16A) | 106.5(2)  |
| C(16A)-C(3A)-C(2A)  | 111.1(2)  |

|                      |          |
|----------------------|----------|
| N(1A)-C(4A)-C(3A)    | 110.6(2) |
| N(2A)-C(4A)-N(1A)    | 122.7(3) |
| N(2A)-C(4A)-C(3A)    | 126.8(2) |
| N(1A)-C(5A)-H(5A)    | 107.5    |
| N(1A)-C(5A)-C(6A)    | 111.8(3) |
| N(1A)-C(5A)-C(7A)    | 110.5(2) |
| C(6A)-C(5A)-H(5A)    | 107.5    |
| C(7A)-C(5A)-H(5A)    | 107.5    |
| C(7A)-C(5A)-C(6A)    | 111.9(3) |
| C(5A)-C(6A)-H(6AA)   | 109.5    |
| C(5A)-C(6A)-H(6AB)   | 109.5    |
| C(5A)-C(6A)-H(6AC)   | 109.5    |
| H(6AA)-C(6A)-H(6AB)  | 109.5    |
| H(6AA)-C(6A)-H(6AC)  | 109.5    |
| H(6AB)-C(6A)-H(6AC)  | 109.5    |
| C(5A)-C(7A)-H(7AA)   | 109.5    |
| C(5A)-C(7A)-H(7AB)   | 109.5    |
| C(5A)-C(7A)-H(7AC)   | 109.5    |
| H(7AA)-C(7A)-H(7AB)  | 109.5    |
| H(7AA)-C(7A)-H(7AC)  | 109.5    |
| H(7AB)-C(7A)-H(7AC)  | 109.5    |
| C(9A)-C(8A)-C(1A)    | 118.4(3) |
| C(9A)-C(8A)-C(13A)   | 119.2(3) |
| C(13A)-C(8A)-C(1A)   | 122.3(3) |
| C(8A)-C(9A)-H(9A)    | 119.8    |
| C(8A)-C(9A)-C(10A)   | 120.4(3) |
| C(10A)-C(9A)-H(9A)   | 119.8    |
| C(9A)-C(10A)-H(10A)  | 120.0    |
| C(11A)-C(10A)-C(9A)  | 120.0(3) |
| C(11A)-C(10A)-H(10A) | 120.0    |
| C(10A)-C(11A)-H(11A) | 119.9    |
| C(12A)-C(11A)-C(10A) | 120.1(3) |
| C(12A)-C(11A)-H(11A) | 119.9    |
| C(11A)-C(12A)-H(12A) | 119.9    |
| C(11A)-C(12A)-C(13A) | 120.1(3) |
| C(13A)-C(12A)-H(12A) | 119.9    |
| C(8A)-C(13A)-H(13A)  | 119.9    |
| C(12A)-C(13A)-C(8A)  | 120.1(3) |
| C(12A)-C(13A)-H(13A) | 119.9    |
| O(1A)-C(14A)-O(2A)   | 125.7(3) |
| O(1A)-C(14A)-C(3A)   | 123.3(3) |
| O(2A)-C(14A)-C(3A)   | 111.1(2) |
| O(2A)-C(15A)-H(15G)  | 109.5    |
| O(2A)-C(15A)-H(15H)  | 109.5    |
| O(2A)-C(15A)-H(15I)  | 109.5    |
| H(15G)-C(15A)-H(15H) | 109.5    |
| H(15G)-C(15A)-H(15I) | 109.5    |
| H(15H)-C(15A)-H(15I) | 109.5    |
| O(3A)-C(16A)-O(4A)   | 126.2(3) |
| O(3A)-C(16A)-C(3A)   | 123.8(2) |
| O(4A)-C(16A)-C(3A)   | 110.0(2) |
| O(4A)-C(17A)-H(17G)  | 109.5    |
| O(4A)-C(17A)-H(17H)  | 109.5    |
| O(4A)-C(17A)-H(17I)  | 109.5    |

|                      |          |
|----------------------|----------|
| H(17G)-C(17A)-H(17H) | 109.5    |
| H(17G)-C(17A)-H(17I) | 109.5    |
| H(17H)-C(17A)-H(17I) | 109.5    |
| N(2A)-C(18A)-H(18A)  | 109.3    |
| N(2A)-C(18A)-C(19A)  | 107.7(3) |
| N(2A)-C(18A)-C(20A)  | 109.9(2) |
| C(19A)-C(18A)-H(18A) | 109.3    |
| C(20A)-C(18A)-H(18A) | 109.3    |
| C(20A)-C(18A)-C(19A) | 111.3(3) |
| C(18A)-C(19A)-H(19G) | 109.5    |
| C(18A)-C(19A)-H(19H) | 109.5    |
| C(18A)-C(19A)-H(19I) | 109.5    |
| H(19G)-C(19A)-H(19H) | 109.5    |
| H(19G)-C(19A)-H(19I) | 109.5    |
| H(19H)-C(19A)-H(19I) | 109.5    |
| C(18A)-C(20A)-H(20G) | 109.5    |
| C(18A)-C(20A)-H(20H) | 109.5    |
| C(18A)-C(20A)-H(20I) | 109.5    |
| H(20G)-C(20A)-H(20H) | 109.5    |
| H(20G)-C(20A)-H(20I) | 109.5    |
| H(20H)-C(20A)-H(20I) | 109.5    |
| C(14B)-O(2B)-C(15B)  | 115.1(3) |
| C(16B)-O(4B)-C(17B)  | 115.6(2) |
| C(1B)-N(1B)-C(5B)    | 122.4(2) |
| C(4B)-N(1B)-C(1B)    | 113.4(2) |
| C(4B)-N(1B)-C(5B)    | 123.9(2) |
| C(4B)-N(2B)-H(2B)    | 116.3    |
| C(4B)-N(2B)-C(18B)   | 127.4(2) |
| C(18B)-N(2B)-H(2B)   | 116.3    |
| N(1B)-C(1B)-H(1B)    | 109.3    |
| N(1B)-C(1B)-C(2B)    | 101.5(2) |
| N(1B)-C(1B)-C(8B)    | 112.3(2) |
| C(2B)-C(1B)-H(1B)    | 109.3    |
| C(8B)-C(1B)-H(1B)    | 109.3    |
| C(8B)-C(1B)-C(2B)    | 114.9(2) |
| C(1B)-C(2B)-H(2BA)   | 110.8    |
| C(1B)-C(2B)-H(2BB)   | 110.8    |
| H(2BA)-C(2B)-H(2BB)  | 108.9    |
| C(3B)-C(2B)-C(1B)    | 104.9(2) |
| C(3B)-C(2B)-H(2BA)   | 110.8    |
| C(3B)-C(2B)-H(2BB)   | 110.8    |
| C(2B)-C(3B)-C(14B)   | 114.4(2) |
| C(2B)-C(3B)-C(16B)   | 110.6(2) |
| C(4B)-C(3B)-C(2B)    | 101.5(2) |
| C(4B)-C(3B)-C(14B)   | 110.4(2) |
| C(4B)-C(3B)-C(16B)   | 113.9(2) |
| C(16B)-C(3B)-C(14B)  | 106.2(2) |
| N(1B)-C(4B)-C(3B)    | 110.4(2) |
| N(2B)-C(4B)-N(1B)    | 122.7(2) |
| N(2B)-C(4B)-C(3B)    | 126.9(2) |
| N(1B)-C(5B)-H(5B)    | 108.1    |
| N(1B)-C(5B)-C(6B)    | 108.7(3) |
| N(1B)-C(5B)-C(7B)    | 112.4(2) |
| C(6B)-C(5B)-H(5B)    | 108.1    |

|                      |          |
|----------------------|----------|
| C(6B)-C(5B)-C(7B)    | 111.1(3) |
| C(7B)-C(5B)-H(5B)    | 108.1    |
| C(5B)-C(6B)-H(6BA)   | 109.5    |
| C(5B)-C(6B)-H(6BB)   | 109.5    |
| C(5B)-C(6B)-H(6BC)   | 109.5    |
| H(6BA)-C(6B)-H(6BB)  | 109.5    |
| H(6BA)-C(6B)-H(6BC)  | 109.5    |
| H(6BB)-C(6B)-H(6BC)  | 109.5    |
| C(5B)-C(7B)-H(7BA)   | 109.5    |
| C(5B)-C(7B)-H(7BB)   | 109.5    |
| C(5B)-C(7B)-H(7BC)   | 109.5    |
| H(7BA)-C(7B)-H(7BB)  | 109.5    |
| H(7BA)-C(7B)-H(7BC)  | 109.5    |
| H(7BB)-C(7B)-H(7BC)  | 109.5    |
| C(9B)-C(8B)-C(1B)    | 118.6(3) |
| C(9B)-C(8B)-C(13B)   | 118.9(3) |
| C(13B)-C(8B)-C(1B)   | 122.4(3) |
| C(8B)-C(9B)-H(9B)    | 120.0    |
| C(10B)-C(9B)-C(8B)   | 120.0(3) |
| C(10B)-C(9B)-H(9B)   | 120.0    |
| C(9B)-C(10B)-H(10B)  | 119.6    |
| C(11B)-C(10B)-C(9B)  | 120.8(3) |
| C(11B)-C(10B)-H(10B) | 119.6    |
| C(10B)-C(11B)-H(11B) | 120.3    |
| C(10B)-C(11B)-C(12B) | 119.3(3) |
| C(12B)-C(11B)-H(11B) | 120.3    |
| C(11B)-C(12B)-H(12B) | 119.9    |
| C(11B)-C(12B)-C(13B) | 120.2(3) |
| C(13B)-C(12B)-H(12B) | 119.9    |
| C(8B)-C(13B)-H(13B)  | 119.7    |
| C(12B)-C(13B)-C(8B)  | 120.6(3) |
| C(12B)-C(13B)-H(13B) | 119.7    |
| O(1B)-C(14B)-O(2B)   | 125.7(3) |
| O(1B)-C(14B)-C(3B)   | 124.5(2) |
| O(2B)-C(14B)-C(3B)   | 109.8(2) |
| O(2B)-C(15B)-H(15D)  | 109.5    |
| O(2B)-C(15B)-H(15E)  | 109.5    |
| O(2B)-C(15B)-H(15F)  | 109.5    |
| H(15D)-C(15B)-H(15E) | 109.5    |
| H(15D)-C(15B)-H(15F) | 109.5    |
| H(15E)-C(15B)-H(15F) | 109.5    |
| O(3B)-C(16B)-O(4B)   | 127.1(3) |
| O(3B)-C(16B)-C(3B)   | 123.2(2) |
| O(4B)-C(16B)-C(3B)   | 109.7(2) |
| O(4B)-C(17B)-H(17D)  | 109.5    |
| O(4B)-C(17B)-H(17E)  | 109.5    |
| O(4B)-C(17B)-H(17F)  | 109.5    |
| H(17D)-C(17B)-H(17E) | 109.5    |
| H(17D)-C(17B)-H(17F) | 109.5    |
| H(17E)-C(17B)-H(17F) | 109.5    |
| N(2B)-C(18B)-H(18B)  | 108.8    |
| N(2B)-C(18B)-C(19B)  | 108.8(3) |
| N(2B)-C(18B)-C(20B)  | 108.3(2) |
| C(19B)-C(18B)-H(18B) | 108.8    |

|                      |          |
|----------------------|----------|
| C(19B)-C(18B)-C(20B) | 113.3(3) |
| C(20B)-C(18B)-H(18B) | 108.8    |
| C(18B)-C(19B)-H(19D) | 109.5    |
| C(18B)-C(19B)-H(19E) | 109.5    |
| C(18B)-C(19B)-H(19F) | 109.5    |
| H(19D)-C(19B)-H(19E) | 109.5    |
| H(19D)-C(19B)-H(19F) | 109.5    |
| H(19E)-C(19B)-H(19F) | 109.5    |
| C(18B)-C(20B)-H(20D) | 109.5    |
| C(18B)-C(20B)-H(20E) | 109.5    |
| C(18B)-C(20B)-H(20F) | 109.5    |
| H(20D)-C(20B)-H(20E) | 109.5    |
| H(20D)-C(20B)-H(20F) | 109.5    |
| H(20E)-C(20B)-H(20F) | 109.5    |
| C(14C)-O(2C)-C(15C)  | 116.4(2) |
| C(16C)-O(4C)-C(17C)  | 114.6(2) |
| C(1C)-N(1C)-C(5C)    | 122.5(2) |
| C(4C)-N(1C)-C(1C)    | 114.1(2) |
| C(4C)-N(1C)-C(5C)    | 123.3(2) |
| C(4C)-N(2C)-H(2C)    | 116.0    |
| C(4C)-N(2C)-C(18C)   | 128.0(2) |
| C(18C)-N(2C)-H(2C)   | 116.0    |
| N(1C)-C(1C)-H(1C)    | 108.9    |
| N(1C)-C(1C)-C(2C)    | 101.6(2) |
| N(1C)-C(1C)-C(8C)    | 113.8(2) |
| C(2C)-C(1C)-H(1C)    | 108.9    |
| C(8C)-C(1C)-H(1C)    | 108.9    |
| C(8C)-C(1C)-C(2C)    | 114.5(2) |
| C(1C)-C(2C)-H(2CA)   | 110.6    |
| C(1C)-C(2C)-H(2CB)   | 110.6    |
| C(1C)-C(2C)-C(3C)    | 105.5(2) |
| H(2CA)-C(2C)-H(2CB)  | 108.8    |
| C(3C)-C(2C)-H(2CA)   | 110.6    |
| C(3C)-C(2C)-H(2CB)   | 110.6    |
| C(4C)-C(3C)-C(2C)    | 101.2(2) |
| C(4C)-C(3C)-C(14C)   | 109.0(2) |
| C(4C)-C(3C)-C(16C)   | 115.9(2) |
| C(14C)-C(3C)-C(2C)   | 114.2(2) |
| C(16C)-C(3C)-C(2C)   | 110.4(2) |
| C(16C)-C(3C)-C(14C)  | 106.4(2) |
| N(1C)-C(4C)-N(2C)    | 123.3(3) |
| N(1C)-C(4C)-C(3C)    | 110.4(2) |
| N(2C)-C(4C)-C(3C)    | 126.3(2) |
| N(1C)-C(5C)-H(5C)    | 107.5    |
| N(1C)-C(5C)-C(6C)    | 111.3(3) |
| N(1C)-C(5C)-C(7C)    | 110.1(2) |
| C(6C)-C(5C)-H(5C)    | 107.5    |
| C(6C)-C(5C)-C(7C)    | 112.6(3) |
| C(7C)-C(5C)-H(5C)    | 107.5    |
| C(5C)-C(6C)-H(6CA)   | 109.5    |
| C(5C)-C(6C)-H(6CB)   | 109.5    |
| C(5C)-C(6C)-H(6CC)   | 109.5    |
| H(6CA)-C(6C)-H(6CB)  | 109.5    |
| H(6CA)-C(6C)-H(6CC)  | 109.5    |



|                      |          |
|----------------------|----------|
| H(6CB)-C(6C)-H(6CC)  | 109.5    |
| C(5C)-C(7C)-H(7CA)   | 109.5    |
| C(5C)-C(7C)-H(7CB)   | 109.5    |
| C(5C)-C(7C)-H(7CC)   | 109.5    |
| H(7CA)-C(7C)-H(7CB)  | 109.5    |
| H(7CA)-C(7C)-H(7CC)  | 109.5    |
| H(7CB)-C(7C)-H(7CC)  | 109.5    |
| C(9C)-C(8C)-C(1C)    | 117.5(2) |
| C(13C)-C(8C)-C(1C)   | 123.6(2) |
| C(13C)-C(8C)-C(9C)   | 118.8(3) |
| C(8C)-C(9C)-H(9C)    | 120.0    |
| C(8C)-C(9C)-C(10C)   | 119.9(3) |
| C(10C)-C(9C)-H(9C)   | 120.0    |
| C(9C)-C(10C)-H(10C)  | 119.8    |
| C(11C)-C(10C)-C(9C)  | 120.4(3) |
| C(11C)-C(10C)-H(10C) | 119.8    |
| C(10C)-C(11C)-H(11C) | 120.0    |
| C(10C)-C(11C)-C(12C) | 119.9(3) |
| C(12C)-C(11C)-H(11C) | 120.0    |
| C(11C)-C(12C)-H(12C) | 120.1    |
| C(13C)-C(12C)-C(11C) | 119.8(3) |
| C(13C)-C(12C)-H(12C) | 120.1    |
| C(8C)-C(13C)-H(13C)  | 119.4    |
| C(12C)-C(13C)-C(8C)  | 121.1(3) |
| C(12C)-C(13C)-H(13C) | 119.4    |
| O(1C)-C(14C)-O(2C)   | 125.9(3) |
| O(1C)-C(14C)-C(3C)   | 123.2(3) |
| O(2C)-C(14C)-C(3C)   | 110.9(2) |
| O(2C)-C(15C)-H(15A)  | 109.5    |
| O(2C)-C(15C)-H(15B)  | 109.5    |
| O(2C)-C(15C)-H(15C)  | 109.5    |
| H(15A)-C(15C)-H(15B) | 109.5    |
| H(15A)-C(15C)-H(15C) | 109.5    |
| H(15B)-C(15C)-H(15C) | 109.5    |
| O(3C)-C(16C)-O(4C)   | 126.0(3) |
| O(3C)-C(16C)-C(3C)   | 124.1(2) |
| O(4C)-C(16C)-C(3C)   | 109.9(2) |
| O(4C)-C(17C)-H(17A)  | 109.5    |
| O(4C)-C(17C)-H(17B)  | 109.5    |
| O(4C)-C(17C)-H(17C)  | 109.5    |
| H(17A)-C(17C)-H(17B) | 109.5    |
| H(17A)-C(17C)-H(17C) | 109.5    |
| H(17B)-C(17C)-H(17C) | 109.5    |
| N(2C)-C(18C)-H(18C)  | 108.7    |
| N(2C)-C(18C)-C(19C)  | 109.0(2) |
| N(2C)-C(18C)-C(20C)  | 109.0(2) |
| C(19C)-C(18C)-H(18C) | 108.7    |
| C(19C)-C(18C)-C(20C) | 112.7(3) |
| C(20C)-C(18C)-H(18C) | 108.7    |
| C(18C)-C(19C)-H(19A) | 109.5    |
| C(18C)-C(19C)-H(19B) | 109.5    |
| C(18C)-C(19C)-H(19C) | 109.5    |
| H(19A)-C(19C)-H(19B) | 109.5    |
| H(19A)-C(19C)-H(19C) | 109.5    |

|                      |          |
|----------------------|----------|
| H(19B)-C(19C)-H(19C) | 109.5    |
| C(18C)-C(20C)-H(20A) | 109.5    |
| C(18C)-C(20C)-H(20B) | 109.5    |
| C(18C)-C(20C)-H(20C) | 109.5    |
| H(20A)-C(20C)-H(20B) | 109.5    |
| H(20A)-C(20C)-H(20C) | 109.5    |
| H(20B)-C(20C)-H(20C) | 109.5    |
| C(14D)-O(2D)-C(15D)  | 115.9(3) |
| C(16D)-O(4D)-C(17D)  | 114.6(2) |
| C(1D)-N(1D)-C(5D)    | 123.8(2) |
| C(4D)-N(1D)-C(1D)    | 113.7(2) |
| C(4D)-N(1D)-C(5D)    | 122.3(2) |
| C(4D)-N(2D)-H(2D)    | 116.2    |
| C(4D)-N(2D)-C(18D)   | 127.6(3) |
| C(18D)-N(2D)-H(2D)   | 116.2    |
| N(1D)-C(1D)-H(1D)    | 108.5    |
| N(1D)-C(1D)-C(2D)    | 102.4(2) |
| N(1D)-C(1D)-C(8D)    | 112.9(2) |
| C(2D)-C(1D)-H(1D)    | 108.5    |
| C(8D)-C(1D)-H(1D)    | 108.5    |
| C(8D)-C(1D)-C(2D)    | 115.6(2) |
| C(1D)-C(2D)-H(2DA)   | 110.9    |
| C(1D)-C(2D)-H(2DB)   | 110.9    |
| C(1D)-C(2D)-C(3D)    | 104.1(2) |
| H(2DA)-C(2D)-H(2DB)  | 109.0    |
| C(3D)-C(2D)-H(2DA)   | 110.9    |
| C(3D)-C(2D)-H(2DB)   | 110.9    |
| C(2D)-C(3D)-C(16D)   | 110.7(2) |
| C(4D)-C(3D)-C(2D)    | 102.1(2) |
| C(4D)-C(3D)-C(14D)   | 111.0(2) |
| C(4D)-C(3D)-C(16D)   | 112.7(2) |
| C(14D)-C(3D)-C(2D)   | 114.5(2) |
| C(14D)-C(3D)-C(16D)  | 106.1(2) |
| N(1D)-C(4D)-C(3D)    | 109.1(2) |
| N(2D)-C(4D)-N(1D)    | 124.0(3) |
| N(2D)-C(4D)-C(3D)    | 126.9(2) |
| N(1D)-C(5D)-H(5D)    | 108.5    |
| N(1D)-C(5D)-C(6D)    | 109.5(3) |
| N(1D)-C(5D)-C(7D)    | 111.0(3) |
| C(6D)-C(5D)-H(5D)    | 108.5    |
| C(7D)-C(5D)-H(5D)    | 108.5    |
| C(7D)-C(5D)-C(6D)    | 110.9(3) |
| C(5D)-C(6D)-H(6DA)   | 109.5    |
| C(5D)-C(6D)-H(6DB)   | 109.5    |
| C(5D)-C(6D)-H(6DC)   | 109.5    |
| H(6DA)-C(6D)-H(6DB)  | 109.5    |
| H(6DA)-C(6D)-H(6DC)  | 109.5    |
| H(6DB)-C(6D)-H(6DC)  | 109.5    |
| C(5D)-C(7D)-H(7DA)   | 109.5    |
| C(5D)-C(7D)-H(7DB)   | 109.5    |
| C(5D)-C(7D)-H(7DC)   | 109.5    |
| H(7DA)-C(7D)-H(7DB)  | 109.5    |
| H(7DA)-C(7D)-H(7DC)  | 109.5    |
| H(7DB)-C(7D)-H(7DC)  | 109.5    |

|                      |          |
|----------------------|----------|
| C(9D)-C(8D)-C(1D)    | 118.6(3) |
| C(13D)-C(8D)-C(1D)   | 121.9(3) |
| C(13D)-C(8D)-C(9D)   | 119.5(3) |
| C(8D)-C(9D)-H(9D)    | 119.7    |
| C(10D)-C(9D)-C(8D)   | 120.7(3) |
| C(10D)-C(9D)-H(9D)   | 119.7    |
| C(9D)-C(10D)-H(10D)  | 120.3    |
| C(9D)-C(10D)-C(11D)  | 119.5(3) |
| C(11D)-C(10D)-H(10D) | 120.3    |
| C(10D)-C(11D)-H(11D) | 119.9    |
| C(12D)-C(11D)-C(10D) | 120.1(3) |
| C(12D)-C(11D)-H(11D) | 119.9    |
| C(11D)-C(12D)-H(12D) | 120.1    |
| C(11D)-C(12D)-C(13D) | 119.9(3) |
| C(13D)-C(12D)-H(12D) | 120.1    |
| C(8D)-C(13D)-C(12D)  | 120.3(3) |
| C(8D)-C(13D)-H(13D)  | 119.9    |
| C(12D)-C(13D)-H(13D) | 119.9    |
| O(1D)-C(14D)-O(2D)   | 125.5(3) |
| O(1D)-C(14D)-C(3D)   | 123.7(3) |
| O(2D)-C(14D)-C(3D)   | 110.8(2) |
| O(2D)-C(15D)-H(15P)  | 109.5    |
| O(2D)-C(15D)-H(15Q)  | 109.5    |
| O(2D)-C(15D)-H(15R)  | 109.5    |
| H(15P)-C(15D)-H(15Q) | 109.5    |
| H(15P)-C(15D)-H(15R) | 109.5    |
| H(15Q)-C(15D)-H(15R) | 109.5    |
| O(3D)-C(16D)-O(4D)   | 127.4(3) |
| O(3D)-C(16D)-C(3D)   | 124.0(3) |
| O(4D)-C(16D)-C(3D)   | 108.5(2) |
| O(4D)-C(17D)-H(17P)  | 109.5    |
| O(4D)-C(17D)-H(17Q)  | 109.5    |
| O(4D)-C(17D)-H(17R)  | 109.5    |
| H(17P)-C(17D)-H(17Q) | 109.5    |
| H(17P)-C(17D)-H(17R) | 109.5    |
| H(17Q)-C(17D)-H(17R) | 109.5    |
| N(2D)-C(18D)-H(18D)  | 108.8    |
| N(2D)-C(18D)-C(19D)  | 108.8(2) |
| N(2D)-C(18D)-C(20D)  | 108.8(2) |
| C(19D)-C(18D)-H(18D) | 108.8    |
| C(20D)-C(18D)-H(18D) | 108.8    |
| C(20D)-C(18D)-C(19D) | 112.7(3) |
| C(18D)-C(19D)-H(19P) | 109.5    |
| C(18D)-C(19D)-H(19Q) | 109.5    |
| C(18D)-C(19D)-H(19R) | 109.5    |
| H(19P)-C(19D)-H(19Q) | 109.5    |
| H(19P)-C(19D)-H(19R) | 109.5    |
| H(19Q)-C(19D)-H(19R) | 109.5    |
| C(18D)-C(20D)-H(20P) | 109.5    |
| C(18D)-C(20D)-H(20Q) | 109.5    |
| C(18D)-C(20D)-H(20R) | 109.5    |
| H(20P)-C(20D)-H(20Q) | 109.5    |
| H(20P)-C(20D)-H(20R) | 109.5    |
| H(20Q)-C(20D)-H(20R) | 109.5    |

|                     |          |
|---------------------|----------|
| C(14E)-O(2E)-C(15E) | 115.7(2) |
| C(16E)-O(4E)-C(17E) | 115.6(2) |
| C(1E)-N(1E)-C(5E)   | 123.7(2) |
| C(4E)-N(1E)-C(1E)   | 113.6(2) |
| C(4E)-N(1E)-C(5E)   | 122.7(3) |
| C(4E)-N(2E)-H(2E)   | 116.0    |
| C(4E)-N(2E)-C(18E)  | 128.1(3) |
| C(18E)-N(2E)-H(2E)  | 116.0    |
| N(1E)-C(1E)-H(1E)   | 108.6    |
| N(1E)-C(1E)-C(2E)   | 102.3(2) |
| N(1E)-C(1E)-C(8E)   | 113.7(2) |
| C(2E)-C(1E)-H(1E)   | 108.6    |
| C(8E)-C(1E)-H(1E)   | 108.6    |
| C(8E)-C(1E)-C(2E)   | 114.8(2) |
| C(1E)-C(2E)-H(2EA)  | 110.7    |
| C(1E)-C(2E)-H(2EB)  | 110.7    |
| C(1E)-C(2E)-C(3E)   | 105.2(2) |
| H(2EA)-C(2E)-H(2EB) | 108.8    |
| C(3E)-C(2E)-H(2EA)  | 110.7    |
| C(3E)-C(2E)-H(2EB)  | 110.7    |
| C(4E)-C(3E)-C(2E)   | 101.4(2) |
| C(4E)-C(3E)-C(14E)  | 109.2(2) |
| C(4E)-C(3E)-C(16E)  | 114.9(2) |
| C(14E)-C(3E)-C(2E)  | 113.6(2) |
| C(16E)-C(3E)-C(2E)  | 109.9(2) |
| C(16E)-C(3E)-C(14E) | 107.9(2) |
| N(1E)-C(4E)-C(3E)   | 110.5(2) |
| N(2E)-C(4E)-N(1E)   | 123.4(3) |
| N(2E)-C(4E)-C(3E)   | 126.1(2) |
| N(1E)-C(5E)-H(5E)   | 107.7    |
| N(1E)-C(5E)-C(6E)   | 111.4(3) |
| N(1E)-C(5E)-C(7E)   | 110.5(2) |
| C(6E)-C(5E)-H(5E)   | 107.7    |
| C(6E)-C(5E)-C(7E)   | 111.8(3) |
| C(7E)-C(5E)-H(5E)   | 107.7    |
| C(5E)-C(6E)-H(6EA)  | 109.5    |
| C(5E)-C(6E)-H(6EB)  | 109.5    |
| C(5E)-C(6E)-H(6EC)  | 109.5    |
| H(6EA)-C(6E)-H(6EB) | 109.5    |
| H(6EA)-C(6E)-H(6EC) | 109.5    |
| H(6EB)-C(6E)-H(6EC) | 109.5    |
| C(5E)-C(7E)-H(7EA)  | 109.5    |
| C(5E)-C(7E)-H(7EB)  | 109.5    |
| C(5E)-C(7E)-H(7EC)  | 109.5    |
| H(7EA)-C(7E)-H(7EB) | 109.5    |
| H(7EA)-C(7E)-H(7EC) | 109.5    |
| H(7EB)-C(7E)-H(7EC) | 109.5    |
| C(9E)-C(8E)-C(1E)   | 117.9(2) |
| C(13E)-C(8E)-C(1E)  | 123.2(3) |
| C(13E)-C(8E)-C(9E)  | 118.8(3) |
| C(8E)-C(9E)-H(9E)   | 119.2    |
| C(8E)-C(9E)-C(10E)  | 121.6(3) |
| C(10E)-C(9E)-H(9E)  | 119.2    |
| C(9E)-C(10E)-H(10E) | 120.6    |

|                      |          |
|----------------------|----------|
| C(9E)-C(10E)-C(11E)  | 118.8(3) |
| C(11E)-C(10E)-H(10E) | 120.6    |
| C(10E)-C(11E)-H(11E) | 120.0    |
| C(12E)-C(11E)-C(10E) | 120.0(3) |
| C(12E)-C(11E)-H(11E) | 120.0    |
| C(11E)-C(12E)-H(12E) | 119.8    |
| C(11E)-C(12E)-C(13E) | 120.5(3) |
| C(13E)-C(12E)-H(12E) | 119.8    |
| C(8E)-C(13E)-C(12E)  | 120.2(3) |
| C(8E)-C(13E)-H(13E)  | 119.9    |
| C(12E)-C(13E)-H(13E) | 119.9    |
| O(1E)-C(14E)-O(2E)   | 125.6(2) |
| O(1E)-C(14E)-C(3E)   | 122.3(3) |
| O(2E)-C(14E)-C(3E)   | 112.1(2) |
| O(2E)-C(15E)-H(15M)  | 109.5    |
| O(2E)-C(15E)-H(15N)  | 109.5    |
| O(2E)-C(15E)-H(15O)  | 109.5    |
| H(15M)-C(15E)-H(15N) | 109.5    |
| H(15M)-C(15E)-H(15O) | 109.5    |
| H(15N)-C(15E)-H(15O) | 109.5    |
| O(3E)-C(16E)-O(4E)   | 126.0(3) |
| O(3E)-C(16E)-C(3E)   | 123.6(2) |
| O(4E)-C(16E)-C(3E)   | 110.3(2) |
| O(4E)-C(17E)-H(17M)  | 109.5    |
| O(4E)-C(17E)-H(17N)  | 109.5    |
| O(4E)-C(17E)-H(17O)  | 109.5    |
| H(17M)-C(17E)-H(17N) | 109.5    |
| H(17M)-C(17E)-H(17O) | 109.5    |
| H(17N)-C(17E)-H(17O) | 109.5    |
| N(2E)-C(18E)-H(18E)  | 108.7    |
| N(2E)-C(18E)-C(19E)  | 108.1(2) |
| N(2E)-C(18E)-C(20E)  | 109.4(2) |
| C(19E)-C(18E)-H(18E) | 108.7    |
| C(20E)-C(18E)-H(18E) | 108.7    |
| C(20E)-C(18E)-C(19E) | 113.2(3) |
| C(18E)-C(19E)-H(19M) | 109.5    |
| C(18E)-C(19E)-H(19N) | 109.5    |
| C(18E)-C(19E)-H(19O) | 109.5    |
| H(19M)-C(19E)-H(19N) | 109.5    |
| H(19M)-C(19E)-H(19O) | 109.5    |
| H(19N)-C(19E)-H(19O) | 109.5    |
| C(18E)-C(20E)-H(20M) | 109.5    |
| C(18E)-C(20E)-H(20N) | 109.5    |
| C(18E)-C(20E)-H(20O) | 109.5    |
| H(20M)-C(20E)-H(20N) | 109.5    |
| H(20M)-C(20E)-H(20O) | 109.5    |
| H(20N)-C(20E)-H(20O) | 109.5    |
| C(14F)-O(2F)-C(15F)  | 115.7(2) |
| C(16F)-O(4F)-C(17F)  | 116.4(2) |
| C(1F)-N(1F)-C(5F)    | 122.3(2) |
| C(4F)-N(1F)-C(1F)    | 113.4(2) |
| C(4F)-N(1F)-C(5F)    | 123.9(2) |
| C(4F)-N(2F)-H(2F)    | 116.3    |
| C(4F)-N(2F)-C(18F)   | 127.5(2) |

|                      |          |
|----------------------|----------|
| C(18F)-N(2F)-H(2F)   | 116.3    |
| N(1F)-C(1F)-H(1F)    | 109.2    |
| N(1F)-C(1F)-C(2F)    | 101.6(2) |
| N(1F)-C(1F)-C(8F)    | 112.3(2) |
| C(2F)-C(1F)-H(1F)    | 109.2    |
| C(8F)-C(1F)-H(1F)    | 109.2    |
| C(8F)-C(1F)-C(2F)    | 115.1(2) |
| C(1F)-C(2F)-H(2FA)   | 110.9    |
| C(1F)-C(2F)-H(2FB)   | 110.9    |
| C(1F)-C(2F)-C(3F)    | 104.4(2) |
| H(2FA)-C(2F)-H(2FB)  | 108.9    |
| C(3F)-C(2F)-H(2FA)   | 110.9    |
| C(3F)-C(2F)-H(2FB)   | 110.9    |
| C(4F)-C(3F)-C(2F)    | 101.8(2) |
| C(4F)-C(3F)-C(14F)   | 110.5(2) |
| C(14F)-C(3F)-C(2F)   | 115.0(2) |
| C(16F)-C(3F)-C(2F)   | 109.2(2) |
| C(16F)-C(3F)-C(4F)   | 114.2(2) |
| C(16F)-C(3F)-C(14F)  | 106.4(2) |
| N(1F)-C(4F)-C(3F)    | 109.5(2) |
| N(2F)-C(4F)-N(1F)    | 123.0(3) |
| N(2F)-C(4F)-C(3F)    | 127.5(2) |
| N(1F)-C(5F)-H(5F)    | 108.0    |
| N(1F)-C(5F)-C(6F)    | 108.8(3) |
| N(1F)-C(5F)-C(7F)    | 112.4(3) |
| C(6F)-C(5F)-H(5F)    | 108.0    |
| C(7F)-C(5F)-H(5F)    | 108.0    |
| C(7F)-C(5F)-C(6F)    | 111.4(3) |
| C(5F)-C(6F)-H(6FA)   | 109.5    |
| C(5F)-C(6F)-H(6FB)   | 109.5    |
| C(5F)-C(6F)-H(6FC)   | 109.5    |
| H(6FA)-C(6F)-H(6FB)  | 109.5    |
| H(6FA)-C(6F)-H(6FC)  | 109.5    |
| H(6FB)-C(6F)-H(6FC)  | 109.5    |
| C(5F)-C(7F)-H(7FA)   | 109.5    |
| C(5F)-C(7F)-H(7FB)   | 109.5    |
| C(5F)-C(7F)-H(7FC)   | 109.5    |
| H(7FA)-C(7F)-H(7FB)  | 109.5    |
| H(7FA)-C(7F)-H(7FC)  | 109.5    |
| H(7FB)-C(7F)-H(7FC)  | 109.5    |
| C(9F)-C(8F)-C(1F)    | 117.4(3) |
| C(13F)-C(8F)-C(1F)   | 122.6(3) |
| C(13F)-C(8F)-C(9F)   | 120.0(3) |
| C(8F)-C(9F)-H(9F)    | 119.9    |
| C(10F)-C(9F)-C(8F)   | 120.3(3) |
| C(10F)-C(9F)-H(9F)   | 119.9    |
| C(9F)-C(10F)-H(10F)  | 120.5    |
| C(9F)-C(10F)-C(11F)  | 119.0(3) |
| C(11F)-C(10F)-H(10F) | 120.5    |
| C(10F)-C(11F)-H(11F) | 119.7    |
| C(12F)-C(11F)-C(10F) | 120.6(3) |
| C(12F)-C(11F)-H(11F) | 119.7    |
| C(11F)-C(12F)-H(12F) | 120.1    |
| C(11F)-C(12F)-C(13F) | 119.8(3) |

|                      |          |
|----------------------|----------|
| C(13F)-C(12F)-H(12F) | 120.1    |
| C(8F)-C(13F)-C(12F)  | 120.3(3) |
| C(8F)-C(13F)-H(13F)  | 119.8    |
| C(12F)-C(13F)-H(13F) | 119.8    |
| O(1F)-C(14F)-O(2F)   | 125.8(2) |
| O(1F)-C(14F)-C(3F)   | 123.1(3) |
| O(2F)-C(14F)-C(3F)   | 111.1(2) |
| O(2F)-C(15F)-H(15J)  | 109.5    |
| O(2F)-C(15F)-H(15K)  | 109.5    |
| O(2F)-C(15F)-H(15L)  | 109.5    |
| H(15J)-C(15F)-H(15K) | 109.5    |
| H(15J)-C(15F)-H(15L) | 109.5    |
| H(15K)-C(15F)-H(15L) | 109.5    |
| O(3F)-C(16F)-O(4F)   | 124.5(2) |
| O(3F)-C(16F)-C(3F)   | 123.4(2) |
| O(4F)-C(16F)-C(3F)   | 112.0(2) |
| O(4F)-C(17F)-H(17J)  | 109.5    |
| O(4F)-C(17F)-H(17K)  | 109.5    |
| O(4F)-C(17F)-H(17L)  | 109.5    |
| H(17J)-C(17F)-H(17K) | 109.5    |
| H(17J)-C(17F)-H(17L) | 109.5    |
| H(17K)-C(17F)-H(17L) | 109.5    |
| N(2F)-C(18F)-H(18F)  | 109.5    |
| N(2F)-C(18F)-C(19F)  | 109.5(2) |
| N(2F)-C(18F)-C(20F)  | 108.1(2) |
| C(19F)-C(18F)-H(18F) | 109.5    |
| C(19F)-C(18F)-C(20F) | 110.7(3) |
| C(20F)-C(18F)-H(18F) | 109.5    |
| C(18F)-C(19F)-H(19J) | 109.5    |
| C(18F)-C(19F)-H(19K) | 109.5    |
| C(18F)-C(19F)-H(19L) | 109.5    |
| H(19J)-C(19F)-H(19K) | 109.5    |
| H(19J)-C(19F)-H(19L) | 109.5    |
| H(19K)-C(19F)-H(19L) | 109.5    |
| C(18F)-C(20F)-H(20J) | 109.5    |
| C(18F)-C(20F)-H(20K) | 109.5    |
| C(18F)-C(20F)-H(20L) | 109.5    |
| H(20J)-C(20F)-H(20K) | 109.5    |
| H(20J)-C(20F)-H(20L) | 109.5    |
| H(20K)-C(20F)-H(20L) | 109.5    |
| H(5AA)-O(5A)-H(5AB)  | 117(3)   |
| H(5BA)-O(5B)-H(5BB)  | 113(3)   |
| H(5CA)-O(5C)-H(5CB)  | 109(2)   |
| H(5DA)-O(5D)-H(5DB)  | 105(2)   |
| H(5EA)-O(5E)-H(5EB)  | 107(2)   |
| H(5FA)-O(5F)-H(5FB)  | 107(4)   |

---

Symmetry transformations used to generate equivalent atoms:

**Table 4. Anisotropic displacement parameters ( $\approx^2 \times 10^4$ ) for afg04. The anisotropic displacement factor exponent takes the form:  $-2\pi^2 [ h^2 a^{*2} U^{11} + \dots + 2 h k a^* b^* U^{12} ]$**

|        | U <sup>11</sup> | U <sup>22</sup> | U <sup>33</sup> | U <sup>23</sup> | U <sup>13</sup> | U <sup>12</sup> |
|--------|-----------------|-----------------|-----------------|-----------------|-----------------|-----------------|
| O(1A)  | 246(12)         | 132(9)          | 182(10)         | 11(8)           | 35(9)           | 80(8)           |
| O(2A)  | 202(12)         | 132(9)          | 284(12)         | -45(8)          | -6(10)          | -9(8)           |
| O(3A)  | 331(14)         | 195(10)         | 173(11)         | 39(8)           | -26(9)          | 90(9)           |
| O(4A)  | 285(12)         | 137(9)          | 176(10)         | 71(8)           | 42(9)           | 65(8)           |
| N(1A)  | 177(13)         | 123(10)         | 105(10)         | 40(8)           | 46(9)           | 41(9)           |
| N(2A)  | 155(12)         | 152(11)         | 102(10)         | 1(8)            | 21(9)           | 42(9)           |
| C(1A)  | 149(14)         | 90(11)          | 175(13)         | 15(9)           | 50(11)          | 44(10)          |
| C(2A)  | 140(14)         | 140(12)         | 166(13)         | 42(10)          | 68(11)          | 49(10)          |
| C(3A)  | 147(14)         | 99(11)          | 127(12)         | 30(9)           | 28(10)          | 48(9)           |
| C(4A)  | 192(15)         | 94(11)          | 134(12)         | 6(9)            | 48(11)          | 67(10)          |
| C(5A)  | 163(15)         | 194(13)         | 128(13)         | 75(10)          | 35(11)          | 34(11)          |
| C(6A)  | 268(18)         | 294(16)         | 135(14)         | 33(12)          | 30(13)          | 16(14)          |
| C(7A)  | 220(17)         | 257(16)         | 255(16)         | 115(13)         | -14(13)         | 95(13)          |
| C(8A)  | 149(14)         | 127(12)         | 145(13)         | 25(10)          | 14(11)          | 4(10)           |
| C(9A)  | 168(15)         | 212(14)         | 163(13)         | 51(11)          | 30(11)          | 29(11)          |
| C(10A) | 199(16)         | 235(15)         | 212(15)         | 95(12)          | 31(12)          | 45(12)          |
| C(11A) | 228(17)         | 202(14)         | 290(17)         | 162(12)         | 62(14)          | 43(12)          |
| C(12A) | 259(17)         | 168(13)         | 260(16)         | 73(11)          | 35(13)          | 94(12)          |
| C(13A) | 190(16)         | 203(13)         | 187(14)         | 96(11)          | 63(12)          | 100(11)         |
| C(14A) | 140(14)         | 141(12)         | 161(13)         | 67(10)          | 21(11)          | 28(10)          |
| C(15A) | 360(20)         | 110(13)         | 450(20)         | -96(14)         | 49(18)          | -22(13)         |
| C(16A) | 117(14)         | 129(12)         | 180(13)         | 69(10)          | 40(11)          | 3(10)           |
| C(17A) | 302(19)         | 203(14)         | 296(17)         | 153(13)         | 75(14)          | 93(13)          |
| C(18A) | 193(16)         | 232(14)         | 115(13)         | 25(11)          | 59(11)          | 65(12)          |
| C(19A) | 259(18)         | 254(16)         | 277(17)         | 30(13)          | 97(14)          | 104(14)         |
| C(20A) | 185(16)         | 288(16)         | 213(16)         | 120(12)         | 7(13)           | 4(13)           |
| O(1B)  | 177(11)         | 139(9)          | 201(11)         | -4(8)           | 21(9)           | 82(8)           |
| O(2B)  | 154(11)         | 78(8)           | 366(13)         | -25(8)          | 34(10)          | -8(7)           |
| O(3B)  | 257(12)         | 180(10)         | 138(10)         | -21(8)          | -66(9)          | 43(9)           |
| O(4B)  | 246(12)         | 108(8)          | 107(9)          | 31(7)           | -2(8)           | 55(8)           |
| N(1B)  | 116(12)         | 124(10)         | 121(10)         | 30(8)           | 7(9)            | -3(8)           |
| N(2B)  | 113(12)         | 158(11)         | 100(10)         | 4(8)            | 13(9)           | 1(9)            |
| C(1B)  | 119(13)         | 108(11)         | 130(12)         | 20(9)           | 38(10)          | 4(9)            |
| C(2B)  | 114(13)         | 121(11)         | 168(13)         | 28(10)          | 7(11)           | 21(10)          |
| C(3B)  | 104(13)         | 107(11)         | 104(11)         | 5(9)            | -30(10)         | 13(9)           |
| C(4B)  | 115(13)         | 72(10)          | 113(12)         | 21(9)           | 9(10)           | 35(9)           |
| C(5B)  | 144(14)         | 199(13)         | 96(12)          | -27(10)         | 6(10)           | -10(11)         |
| C(6B)  | 490(20)         | 151(14)         | 245(17)         | -70(12)         | -74(17)         | -43(15)         |
| C(7B)  | 207(17)         | 349(18)         | 140(14)         | 29(12)          | 38(12)          | -12(14)         |
| C(8B)  | 162(15)         | 128(12)         | 167(13)         | 19(10)          | -22(11)         | -9(10)          |
| C(9B)  | 205(16)         | 190(14)         | 179(14)         | 59(11)          | 19(12)          | -31(12)         |
| C(10B) | 277(19)         | 219(15)         | 241(16)         | 117(12)         | 7(14)           | -80(13)         |
| C(11B) | 350(20)         | 161(14)         | 267(17)         | 92(12)          | -67(15)         | -32(13)         |
| C(12B) | 400(20)         | 211(15)         | 274(18)         | 68(13)          | -41(15)         | 112(14)         |
| C(13B) | 270(18)         | 165(13)         | 208(15)         | 52(11)          | 16(13)          | 69(12)          |
| C(14B) | 155(14)         | 87(11)          | 158(13)         | 29(9)           | 11(11)          | 16(10)          |



|        |         |         |         |         |         |         |
|--------|---------|---------|---------|---------|---------|---------|
| C(15B) | 340(20) | 73(13)  | 550(20) | -81(14) | 87(18)  | -24(13) |
| C(16B) | 122(13) | 81(11)  | 116(12) | 1(9)    | 15(10)  | -4(9)   |
| C(17B) | 277(17) | 193(13) | 122(13) | 67(10)  | 20(12)  | 100(12) |
| C(18B) | 198(16) | 172(13) | 74(12)  | -18(10) | 23(11)  | 7(11)   |
| C(19B) | 122(15) | 279(16) | 282(17) | -48(13) | 56(13)  | 44(12)  |
| C(20B) | 232(17) | 285(16) | 180(15) | 103(12) | 63(13)  | 32(13)  |
| O(1C)  | 224(12) | 106(9)  | 222(11) | 35(8)   | 32(9)   | 54(8)   |
| O(2C)  | 191(12) | 114(9)  | 264(11) | 14(8)   | 58(9)   | -16(8)  |
| O(3C)  | 211(12) | 148(9)  | 152(10) | 8(7)    | -45(8)  | 31(8)   |
| O(4C)  | 276(12) | 117(9)  | 126(9)  | 37(7)   | 7(8)    | 61(8)   |
| N(1C)  | 160(12) | 110(10) | 107(10) | 28(8)   | 49(9)   | 39(9)   |
| N(2C)  | 150(12) | 162(11) | 83(10)  | 17(8)   | 14(9)   | 30(9)   |
| C(1C)  | 205(15) | 133(12) | 116(12) | 57(10)  | 76(11)  | 71(11)  |
| C(2C)  | 175(15) | 139(12) | 130(12) | 40(9)   | 53(11)  | 63(10)  |
| C(3C)  | 117(13) | 100(11) | 131(12) | 9(9)    | 13(10)  | 27(9)   |
| C(4C)  | 156(14) | 80(11)  | 120(12) | 33(9)   | 20(10)  | 37(10)  |
| C(5C)  | 183(15) | 176(13) | 95(12)  | 27(10)  | 4(11)   | 27(11)  |
| C(6C)  | 291(19) | 258(16) | 136(14) | -22(12) | 0(13)   | 3(13)   |
| C(7C)  | 197(17) | 208(14) | 280(17) | 79(12)  | -25(13) | 51(12)  |
| C(8C)  | 176(15) | 122(12) | 119(12) | 32(9)   | 19(11)  | 39(10)  |
| C(9C)  | 222(16) | 183(13) | 124(13) | 54(10)  | 83(11)  | 51(11)  |
| C(10C) | 269(18) | 221(14) | 201(15) | 137(12) | 107(13) | 49(13)  |
| C(11C) | 280(18) | 154(13) | 213(15) | 108(11) | 56(13)  | 43(12)  |
| C(12C) | 275(17) | 124(12) | 199(14) | 51(10)  | 31(12)  | 73(11)  |
| C(13C) | 246(17) | 155(13) | 161(13) | 49(10)  | 98(12)  | 102(11) |
| C(14C) | 205(15) | 111(12) | 96(12)  | 29(9)   | 1(11)   | -5(10)  |
| C(15C) | 320(20) | 139(13) | 348(19) | 12(12)  | 154(16) | -19(13) |
| C(16C) | 98(14)  | 131(12) | 192(14) | 64(10)  | 31(11)  | 54(10)  |
| C(17C) | 350(20) | 200(14) | 228(15) | 150(12) | 56(14)  | 115(13) |
| C(18C) | 160(15) | 214(13) | 83(12)  | 53(10)  | 0(10)   | 29(11)  |
| C(19C) | 311(19) | 283(16) | 89(13)  | -87(11) | 12(12)  | 92(14)  |
| C(20C) | 206(16) | 223(15) | 157(14) | 76(11)  | 13(12)  | 10(12)  |
| O(1D)  | 206(12) | 167(10) | 223(11) | 30(8)   | 2(9)    | 26(8)   |
| O(2D)  | 223(12) | 110(9)  | 280(12) | 53(8)   | 49(9)   | 69(8)   |
| O(3D)  | 225(12) | 131(9)  | 181(10) | 15(8)   | 12(9)   | 35(8)   |
| O(4D)  | 216(11) | 87(8)   | 170(10) | 36(7)   | 16(8)   | 4(8)    |
| N(1D)  | 224(14) | 153(11) | 80(10)  | 19(8)   | -16(9)  | 79(9)   |
| N(2D)  | 181(13) | 132(10) | 105(10) | 19(8)   | 5(9)    | 63(9)   |
| C(1D)  | 184(15) | 166(13) | 128(13) | 35(10)  | -17(11) | 64(11)  |
| C(2D)  | 134(14) | 177(13) | 175(13) | 64(10)  | -15(11) | 77(11)  |
| C(3D)  | 118(13) | 113(11) | 148(13) | 17(9)   | 2(10)   | 22(10)  |
| C(4D)  | 167(14) | 70(10)  | 127(12) | 23(9)   | -21(10) | 26(10)  |
| C(5D)  | 310(18) | 229(14) | 132(13) | -30(11) | -18(12) | 167(13) |
| C(6D)  | 750(30) | 164(15) | 360(20) | -54(14) | 0(20)   | 124(18) |
| C(7D)  | 780(30) | 490(20) | 120(15) | 39(14)  | 63(17)  | 510(20) |
| C(8D)  | 174(15) | 148(12) | 171(13) | 43(10)  | -12(11) | 77(11)  |
| C(9D)  | 209(16) | 158(13) | 192(14) | 28(11)  | -26(12) | 59(11)  |
| C(10D) | 312(19) | 235(15) | 202(15) | 74(12)  | -17(14) | 108(13) |
| C(11D) | 308(19) | 221(15) | 211(15) | 116(12) | 57(14)  | 76(13)  |
| C(12D) | 223(17) | 249(15) | 206(15) | 93(12)  | -12(13) | -12(13) |
| C(13D) | 159(15) | 240(14) | 152(14) | 86(11)  | -33(11) | 2(12)   |
| C(14D) | 174(15) | 132(12) | 115(12) | 57(9)   | 36(11)  | 20(10)  |
| C(15D) | 330(20) | 115(13) | 308(18) | 33(12)  | 31(15)  | 43(12)  |
| C(16D) | 137(15) | 141(13) | 296(17) | 48(12)  | 79(13)  | 57(11)  |

|        |         |         |         |         |         |         |
|--------|---------|---------|---------|---------|---------|---------|
| C(17D) | 227(17) | 170(13) | 199(15) | 86(11)  | 30(12)  | 31(12)  |
| C(18D) | 166(15) | 187(13) | 120(13) | 29(10)  | -25(11) | 64(11)  |
| C(19D) | 229(17) | 246(15) | 180(15) | 49(12)  | -67(13) | 67(13)  |
| C(20D) | 274(18) | 202(14) | 207(15) | 74(12)  | -23(13) | 51(12)  |
| O(1E)  | 127(11) | 105(9)  | 242(11) | 17(8)   | -31(9)  | -22(7)  |
| O(2E)  | 186(11) | 130(9)  | 271(12) | 11(8)   | -32(9)  | 54(8)   |
| O(3E)  | 205(12) | 141(9)  | 192(10) | 5(8)    | 50(9)   | 13(8)   |
| O(4E)  | 206(11) | 121(9)  | 142(9)  | 41(7)   | -18(8)  | -3(8)   |
| N(1E)  | 182(13) | 111(10) | 108(11) | 17(8)   | -20(9)  | 32(9)   |
| N(2E)  | 147(12) | 147(11) | 117(11) | 22(8)   | 4(9)    | 62(9)   |
| C(1E)  | 146(14) | 134(12) | 139(13) | 24(10)  | -37(11) | -6(10)  |
| C(2E)  | 113(14) | 146(12) | 192(14) | 63(10)  | -21(11) | -20(10) |
| C(3E)  | 118(13) | 97(11)  | 149(12) | 26(9)   | -8(10)  | -6(9)   |
| C(4E)  | 113(13) | 91(11)  | 131(12) | 15(9)   | -13(10) | -22(9)  |
| C(5E)  | 233(16) | 159(13) | 131(13) | 39(10)  | 28(11)  | 78(11)  |
| C(6E)  | 330(20) | 286(16) | 104(13) | 37(11)  | -32(13) | 89(14)  |
| C(7E)  | 231(18) | 286(17) | 260(17) | 79(13)  | 89(14)  | 70(13)  |
| C(8E)  | 150(14) | 136(12) | 139(12) | 34(10)  | -17(10) | 33(10)  |
| C(9E)  | 159(15) | 203(13) | 176(14) | 60(11)  | -20(11) | 35(11)  |
| C(10E) | 284(19) | 223(15) | 235(16) | 93(12)  | -43(13) | 83(13)  |
| C(11E) | 278(18) | 203(14) | 275(17) | 115(12) | -25(14) | 54(13)  |
| C(12E) | 209(17) | 175(13) | 258(16) | 114(12) | -28(13) | -8(12)  |
| C(13E) | 185(16) | 198(14) | 208(15) | 85(11)  | -32(12) | 43(12)  |
| C(14E) | 168(14) | 113(11) | 108(12) | 32(9)   | 3(10)   | 30(10)  |
| C(15E) | 330(20) | 83(12)  | 420(20) | 14(12)  | -59(16) | 79(12)  |
| C(16E) | 115(13) | 116(11) | 167(13) | 44(10)  | 15(11)  | 15(10)  |
| C(17E) | 259(18) | 179(14) | 194(15) | 105(11) | 14(13)  | -8(12)  |
| C(18E) | 173(15) | 177(13) | 87(12)  | 35(10)  | -15(10) | 75(11)  |
| C(19E) | 150(15) | 196(14) | 222(15) | -15(11) | -45(12) | 65(11)  |
| C(20E) | 226(17) | 224(14) | 194(15) | 100(12) | 23(12)  | 93(12)  |
| O(1F)  | 190(12) | 151(10) | 243(11) | 61(8)   | 13(9)   | 47(8)   |
| O(2F)  | 231(12) | 101(9)  | 213(11) | 20(8)   | 15(9)   | 35(8)   |
| O(3F)  | 243(12) | 163(9)  | 150(10) | -4(8)   | 55(9)   | 67(8)   |
| O(4F)  | 257(12) | 107(8)  | 99(9)   | 34(7)   | 29(8)   | 12(8)   |
| N(1F)  | 168(13) | 136(10) | 110(10) | 33(8)   | -17(9)  | 80(9)   |
| N(2F)  | 141(12) | 133(10) | 98(10)  | 20(8)   | -12(9)  | 52(9)   |
| C(1F)  | 147(14) | 163(12) | 135(12) | 46(10)  | 1(11)   | 71(10)  |
| C(2F)  | 167(14) | 134(12) | 121(12) | 35(9)   | 7(11)   | 39(10)  |
| C(3F)  | 126(13) | 91(11)  | 132(12) | 27(9)   | -2(10)  | 16(9)   |
| C(4F)  | 140(14) | 81(11)  | 132(12) | 26(9)   | 10(10)  | 17(9)   |
| C(5F)  | 326(18) | 192(14) | 160(14) | 0(11)   | 9(13)   | 160(13) |
| C(6F)  | 630(30) | 219(16) | 240(17) | 2(13)   | 13(18)  | 172(17) |
| C(7F)  | 380(20) | 330(17) | 125(14) | -28(12) | -34(14) | 192(15) |
| C(8F)  | 225(16) | 146(12) | 131(13) | 35(10)  | 39(11)  | 85(11)  |
| C(9F)  | 310(18) | 229(15) | 174(14) | 68(11)  | 42(13)  | 174(13) |
| C(10F) | 430(20) | 278(16) | 180(15) | 111(12) | 94(14)  | 237(15) |
| C(11F) | 550(30) | 199(15) | 261(17) | 104(13) | 208(17) | 145(15) |
| C(12F) | 430(20) | 203(15) | 258(17) | 91(13)  | 153(16) | 59(15)  |
| C(13F) | 246(18) | 229(15) | 183(15) | 69(12)  | 45(13)  | 60(13)  |
| C(14F) | 157(14) | 123(12) | 128(12) | 21(9)   | 13(11)  | 24(10)  |
| C(15F) | 350(20) | 72(11)  | 238(15) | 8(10)   | 62(14)  | 23(12)  |
| C(16F) | 132(14) | 155(12) | 50(11)  | 17(9)   | -21(10) | 62(10)  |
| C(17F) | 238(17) | 216(14) | 155(14) | 107(11) | 27(12)  | 22(12)  |
| C(18F) | 177(15) | 168(12) | 99(12)  | 22(10)  | -28(11) | 61(11)  |

|        |         |         |         |        |         |         |
|--------|---------|---------|---------|--------|---------|---------|
| C(19F) | 215(17) | 139(13) | 200(15) | -5(11) | -47(13) | -39(11) |
| C(20F) | 351(19) | 240(15) | 129(13) | 76(11) | -9(13)  | 130(13) |
| Br(1A) | 265(2)  | 205(1)  | 172(1)  | 6(1)   | -6(1)   | 118(1)  |
| Br(1B) | 212(2)  | 209(1)  | 143(1)  | 38(1)  | 18(1)   | 89(1)   |
| Br(1C) | 286(2)  | 173(1)  | 186(2)  | -11(1) | -24(1)  | 92(1)   |
| Br(1D) | 242(2)  | 223(2)  | 175(2)  | 45(1)  | 22(1)   | -12(1)  |
| Br(1E) | 225(2)  | 166(1)  | 142(1)  | 0(1)   | 31(1)   | -40(1)  |
| Br(1F) | 212(2)  | 228(2)  | 157(1)  | 45(1)  | -2(1)   | 10(1)   |
| O(5A)  | 202(12) | 160(10) | 207(11) | 8(8)   | 11(9)   | 47(8)   |
| O(5B)  | 155(11) | 210(10) | 200(11) | 29(8)  | -5(9)   | -74(9)  |
| O(5C)  | 189(12) | 159(10) | 246(12) | 43(8)  | 21(9)   | 55(9)   |
| O(5D)  | 342(15) | 272(12) | 219(12) | 50(9)  | 23(10)  | 202(11) |
| O(5E)  | 200(12) | 176(10) | 162(10) | 29(8)  | 54(9)   | 63(8)   |
| O(5F)  | 253(13) | 291(12) | 214(12) | 35(9)  | 37(10)  | 159(10) |

---

**Table 5. Hydrogen coordinates ( $\times 10^3$ ) and isotropic displacement parameters ( $\approx^2 \times 10^3$ ) for afg04.**

|        | x   | y   | z   | $U_{\text{iso}}$ |
|--------|-----|-----|-----|------------------|
| H(2A)  | 204 | 104 | 797 | 17               |
| H(1A)  | 646 | 133 | 714 | 16               |
| H(2AA) | 842 | 242 | 787 | 17               |
| H(2AB) | 776 | 130 | 782 | 17               |
| H(5A)  | 213 | 72  | 729 | 19               |
| H(6AA) | 404 | 146 | 657 | 37               |
| H(6AB) | 228 | 64  | 650 | 37               |
| H(6AC) | 402 | 47  | 670 | 37               |
| H(7AA) | 186 | 224 | 753 | 35               |
| H(7AB) | 98  | 182 | 702 | 35               |
| H(7AC) | 282 | 256 | 709 | 35               |
| H(9A)  | 782 | 222 | 663 | 22               |
| H(10A) | 859 | 359 | 632 | 25               |
| H(11A) | 792 | 492 | 668 | 27               |
| H(12A) | 646 | 488 | 735 | 26               |
| H(13A) | 565 | 351 | 766 | 21               |
| H(15G) | 784 | 477 | 855 | 51               |
| H(15H) | 964 | 472 | 878 | 51               |
| H(15I) | 794 | 446 | 905 | 51               |
| H(17G) | 691 | -57 | 862 | 37               |
| H(17H) | 593 | -8  | 900 | 37               |
| H(17I) | 793 | 36  | 896 | 37               |
| H(18A) | 381 | 168 | 885 | 21               |
| H(19G) | 173 | 248 | 870 | 38               |
| H(19H) | 114 | 190 | 910 | 38               |
| H(19I) | 25  | 151 | 859 | 38               |
| H(20G) | 99  | 3   | 863 | 35               |
| H(20H) | 211 | 38  | 912 | 35               |
| H(20I) | 296 | 1   | 867 | 35               |
| H(2B)  | -4  | 75  | 461 | 16               |
| H(1B)  | 460 | 112 | 381 | 15               |
| H(2BA) | 580 | 124 | 454 | 16               |
| H(2BB) | 628 | 234 | 453 | 16               |
| H(5B)  | 0   | 59  | 391 | 20               |
| H(6BA) | 226 | -58 | 383 | 50               |
| H(6BB) | 27  | -92 | 363 | 50               |
| H(6BC) | 78  | -61 | 418 | 50               |
| H(7BA) | 134 | 130 | 331 | 37               |
| H(7BB) | 45  | 22  | 312 | 37               |
| H(7BC) | 249 | 58  | 324 | 37               |
| H(9B)  | 598 | 218 | 334 | 25               |
| H(10B) | 613 | 349 | 300 | 32               |
| H(11B) | 460 | 456 | 328 | 33               |
| H(12B) | 280 | 426 | 388 | 35               |
| H(13B) | 258 | 293 | 421 | 25               |
| H(15D) | 494 | 467 | 503 | 53               |
| H(15E) | 692 | 482 | 520 | 53               |

|        |      |     |     |    |
|--------|------|-----|-----|----|
| H(15F) | 543  | 453 | 554 | 53 |
| H(17D) | 488  | -42 | 549 | 28 |
| H(17E) | 396  | 20  | 584 | 28 |
| H(17F) | 596  | 58  | 576 | 28 |
| H(18B) | 166  | 149 | 549 | 19 |
| H(19D) | -33  | 229 | 532 | 36 |
| H(19E) | -101 | 171 | 572 | 36 |
| H(19F) | -183 | 134 | 520 | 36 |
| H(20D) | -108 | -19 | 527 | 35 |
| H(20E) | -10  | 21  | 577 | 35 |
| H(20F) | 90   | -16 | 536 | 35 |
| H(2C)  | 416  | 99  | 128 | 16 |
| H(1C)  | 849  | 121 | 40  | 17 |
| H(2CA) | 1052 | 228 | 112 | 17 |
| H(2CB) | 979  | 118 | 109 | 17 |
| H(5C)  | 419  | 57  | 59  | 19 |
| H(6CA) | 606  | 125 | -15 | 37 |
| H(6CB) | 432  | 43  | -20 | 37 |
| H(6CC) | 608  | 29  | 1   | 37 |
| H(7CA) | 386  | 208 | 80  | 34 |
| H(7CB) | 300  | 164 | 28  | 34 |
| H(7CC) | 483  | 240 | 36  | 34 |
| H(9C)  | 994  | 214 | -9  | 21 |
| H(10C) | 1067 | 352 | -39 | 26 |
| H(11C) | 991  | 482 | -4  | 25 |
| H(12C) | 834  | 474 | 62  | 23 |
| H(13C) | 753  | 336 | 91  | 21 |
| H(15A) | 1026 | 476 | 158 | 42 |
| H(15B) | 1175 | 471 | 195 | 42 |
| H(15C) | 982  | 457 | 209 | 42 |
| H(17A) | 855  | -61 | 201 | 36 |
| H(17B) | 813  | 14  | 240 | 36 |
| H(17C) | 1004 | 30  | 224 | 36 |
| H(18C) | 605  | 167 | 215 | 18 |
| H(19A) | 412  | 254 | 202 | 36 |
| H(19B) | 349  | 197 | 243 | 36 |
| H(19C) | 254  | 161 | 192 | 36 |
| H(20A) | 317  | 5   | 195 | 30 |
| H(20B) | 427  | 43  | 244 | 30 |
| H(20C) | 513  | 2   | 200 | 30 |
| H(2D)  | 98   | 754 | 670 | 16 |
| H(1D)  | 531  | 721 | 758 | 19 |
| H(2DA) | 563  | 591 | 691 | 18 |
| H(2DB) | 628  | 700 | 687 | 18 |
| H(5D)  | 128  | 777 | 740 | 26 |
| H(6DA) | 471  | 898 | 753 | 65 |
| H(6DB) | 300  | 931 | 760 | 65 |
| H(6DC) | 339  | 888 | 709 | 65 |
| H(7DA) | 236  | 712 | 803 | 60 |
| H(7DB) | 204  | 812 | 818 | 60 |
| H(7DC) | 395  | 804 | 812 | 60 |
| H(9D)  | 568  | 620 | 808 | 22 |
| H(10D) | 458  | 495 | 846 | 29 |
| H(11D) | 188  | 390 | 820 | 28 |

|        |      |     |     |    |
|--------|------|-----|-----|----|
| H(12D) | 26   | 415 | 757 | 28 |
| H(13D) | 136  | 542 | 720 | 23 |
| H(15P) | 229  | 362 | 596 | 38 |
| H(15Q) | 190  | 360 | 649 | 38 |
| H(15R) | 363  | 339 | 631 | 38 |
| H(17P) | 515  | 793 | 552 | 30 |
| H(17Q) | 688  | 765 | 564 | 30 |
| H(17R) | 665  | 864 | 587 | 30 |
| H(18D) | 176  | 667 | 586 | 19 |
| H(19P) | -101 | 589 | 600 | 33 |
| H(19Q) | -123 | 649 | 560 | 33 |
| H(19R) | -153 | 684 | 613 | 33 |
| H(20P) | 67   | 834 | 598 | 34 |
| H(20Q) | 132  | 788 | 551 | 34 |
| H(20R) | 265  | 834 | 596 | 34 |
| H(2E)  | 725  | 727 | 339 | 16 |
| H(1E)  | 1153 | 714 | 432 | 18 |
| H(2EA) | 1241 | 603 | 363 | 19 |
| H(2EB) | 1274 | 713 | 364 | 19 |
| H(5E)  | 778  | 772 | 408 | 20 |
| H(6EA) | 909  | 709 | 485 | 36 |
| H(6EB) | 818  | 791 | 487 | 36 |
| H(6EC) | 1004 | 804 | 468 | 36 |
| H(7EA) | 600  | 615 | 388 | 38 |
| H(7EB) | 557  | 669 | 436 | 38 |
| H(7EC) | 667  | 595 | 437 | 38 |
| H(9E)  | 1236 | 625 | 481 | 22 |
| H(10E) | 1190 | 492 | 516 | 29 |
| H(11E) | 972  | 358 | 483 | 30 |
| H(12E) | 792  | 362 | 419 | 26 |
| H(13E) | 836  | 496 | 385 | 23 |
| H(15M) | 935  | 367 | 266 | 42 |
| H(15N) | 943  | 355 | 319 | 42 |
| H(15O) | 1105 | 352 | 290 | 42 |
| H(17M) | 1192 | 808 | 230 | 32 |
| H(17N) | 1372 | 801 | 252 | 32 |
| H(17O) | 1302 | 888 | 271 | 32 |
| H(18E) | 830  | 654 | 255 | 17 |
| H(19M) | 557  | 566 | 263 | 29 |
| H(19N) | 533  | 629 | 226 | 29 |
| H(19O) | 491  | 656 | 279 | 29 |
| H(20M) | 708  | 816 | 269 | 30 |
| H(20N) | 772  | 775 | 222 | 30 |
| H(20O) | 907  | 819 | 266 | 30 |
| H(2F)  | 294  | 753 | 11  | 15 |
| H(1F)  | 736  | 716 | 95  | 17 |
| H(2FA) | 771  | 594 | 25  | 17 |
| H(2FB) | 827  | 704 | 23  | 17 |
| H(5F)  | 326  | 770 | 82  | 25 |
| H(6FA) | 669  | 891 | 94  | 54 |
| H(6FB) | 499  | 923 | 105 | 54 |
| H(6FC) | 530  | 887 | 53  | 54 |
| H(7FA) | 413  | 700 | 142 | 40 |
| H(7FB) | 415  | 806 | 160 | 40 |

|        |        |        |        |    |
|--------|--------|--------|--------|----|
| H(7FC) | 592    | 780    | 150    | 40 |
| H(9F)  | 782    | 610    | 140    | 26 |
| H(10F) | 683    | 477    | 174    | 31 |
| H(11F) | 413    | 372    | 146    | 38 |
| H(12F) | 242    | 403    | 88     | 35 |
| H(13F) | 341    | 538    | 56     | 26 |
| H(15J) | 426    | 364    | -66    | 34 |
| H(15K) | 383    | 363    | -14    | 34 |
| H(15L) | 556    | 340    | -30    | 34 |
| H(17J) | 696    | 780    | -116   | 30 |
| H(17K) | 882    | 771    | -100   | 30 |
| H(17L) | 828    | 864    | -82    | 30 |
| H(18F) | 373    | 676    | -76    | 18 |
| H(19J) | 93     | 599    | -62    | 31 |
| H(19K) | 78     | 660    | -101   | 31 |
| H(19L) | 45     | 695    | -49    | 31 |
| H(20J) | 267    | 844    | -55    | 34 |
| H(20K) | 318    | 804    | -105   | 34 |
| H(20L) | 462    | 843    | -62    | 34 |
| H(5AA) | 998(5) | -14(2) | 771(1) | 29 |
| H(5AB) | 915(5) | 48(2)  | 797(1) | 29 |
| H(5BA) | 681(4) | -35(2) | 445(1) | 32 |
| H(5BB) | 758(5) | 62(1)  | 454(1) | 32 |
| H(5CA) | 145(5) | -29(1) | 117(1) | 29 |
| H(5CB) | 114(4) | 59(2)  | 119(1) | 29 |
| H(5DA) | 897(5) | 875(2) | 681(1) | 38 |
| H(5DB) | 901(5) | 820(2) | 715(1) | 38 |
| H(5EA) | 601(5) | 860(2) | 349(1) | 26 |
| H(5EB) | 528(5) | 808(2) | 383(1) | 26 |
| H(5FA) | 230(2) | 832(3) | 35(1)  | 35 |
| H(5FB) | 75(5)  | 820(3) | 57(1)  | 35 |

---
